# Supplementary material for: Efficient synthesis of tetracyclic γ-lactamsviagold-catalyzed oxidative cyclization of alkenyl diynes
Source: Royal Society of Chemistry journal article supplement (doi:10.1039/d2qo00123c), 2022-01-01

Supporting Information

**Efficient synthesis of tetracyclic  $\gamma$ -lactams via gold-catalyzed oxidative  
cyclization of alkenyl diynes**

Chong-Yang Shi,<sup>a,#</sup> Ji-Jia Zhou,<sup>a,#</sup> Pan Hong,<sup>a,#</sup> Bo-Han Zhu,<sup>b</sup> Feng-Lin Hong,<sup>a</sup>

Peng-Cheng Qian,<sup>\*b</sup> Qing Sun,<sup>\*c</sup> Xin Lu<sup>a</sup> and Long-Wu Ye<sup>\*a,d</sup>

<sup>a</sup> Key Laboratory for Chemical Biology of Fujian Province and State Key Laboratory of Physical Chemistry of Solid Surfaces, College of Chemistry and Chemical Engineering, Xiamen University, Xiamen 361005, China.

E-mail: [longwuye@xmu.edu.cn](mailto:longwuye@xmu.edu.cn)

<sup>b</sup> Institute of New Materials & Industry Technology, College of Chemistry & Materials Engineering, Wenzhou University, Wenzhou 325035, China.

E-mail: [qpc@wzu.edu.cn](mailto:qpc@wzu.edu.cn)

<sup>c</sup> Key Laboratory of Jiangxi Province for Persistent Pollutants Control and Resources Recycle, Nanchang Hangkong University, Nanchang 330063, China.

E-mail: [sunqing@nchu.edu.cn](mailto:sunqing@nchu.edu.cn)

<sup>d</sup> State Key Laboratory of Organometallic Chemistry, Shanghai Institute of Organic Chemistry, Chinese Academy of Sciences, Shanghai 200032, China.

| Content                                                 | Page number |
|---------------------------------------------------------|-------------|
| General                                                 | 2           |
| More Substrate Scope Study                              | 3           |
| Preparation of Starting Materials                       | 4           |
| General Procedure: Gold Catalysis                       | 18          |
| Crystal Data                                            | 34          |
| Computational Studies                                   | 35          |
| HPLC Chromatograms                                      | 85          |
| <sup>1</sup> H, <sup>13</sup> C and <sup>19</sup> F NMR | 88          |

**General Information.** Ethyl acetate (ACS grade), hexanes (ACS grade) and  $\text{HCCl}_3$  (ACS grade) were obtained commercially and used without further purification. Methylene chloride, tetrahydrofuran and diethyl ether were purified according to standard methods unless otherwise noted. Commercially available reagents were used without further purification. Reactions were monitored by thin layer chromatography (TLC) using silicycle pre-coated silica gel plates. Flash column chromatography was performed over silica gel (300-400 mesh). Infrared spectra were recorded on a NicoletAVATER FTIR330 spectrometer as thin film and are reported in reciprocal centimeter ( $\text{cm}^{-1}$ ). Mass spectra were recorded with Micromass QTOF<sub>2</sub> Quadrupole/Time-of-Flight Tandem mass spectrometer using electron spray ionization.

$^1\text{H}$  NMR spectra were recorded on a Bruker AV-400 spectrometer and a Bruker AV-500 spectrometer in chloroform- $\text{d}_3$ . Chemical shifts are reported in ppm with the internal TMS signal at 0.0 ppm as a standard. The data is being reported as (s = singlet, d = doublet, t = triplet, m = multiplet or unresolved, brs = broad singlet, coupling constant(s) in Hz, integration).

$^{13}\text{C}$  NMR spectra were recorded on a Bruker AV-400 spectrometer and a Bruker AV-500 spectrometer in chloroform- $\text{d}_3$ . Chemical shifts are reported in ppm with the internal chloroform signal at 77.0 ppm as a standard.

## More Substrate Scope Study

1. The use of Ph-substituted alkene-diyne **1w** only led to a complicated mixture of products (<10% yield of the desired product **2w**) under the relevant reaction conditions

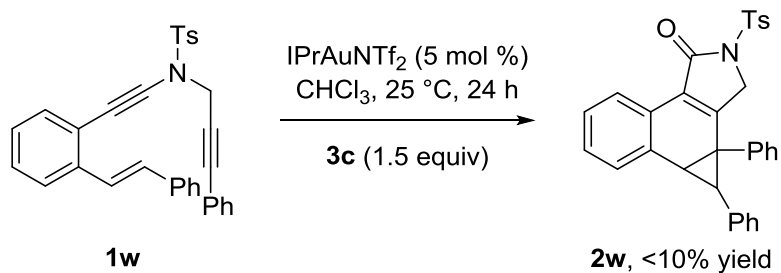

2. In the case of ynamide **1v**, the corresponding tricyclic compound **2v'** was obtained as the main byproduct.

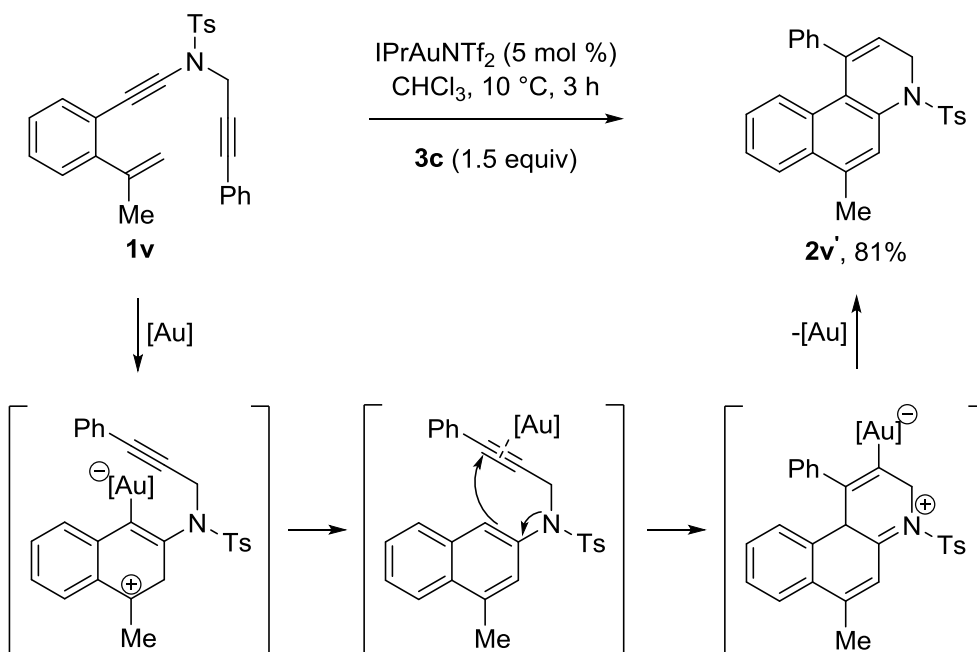

## Representative synthetic procedures for the preparation of alkenyl diynes 1.

1. Propargyl amide derivatives were prepared according to the following procedures.<sup>1</sup>

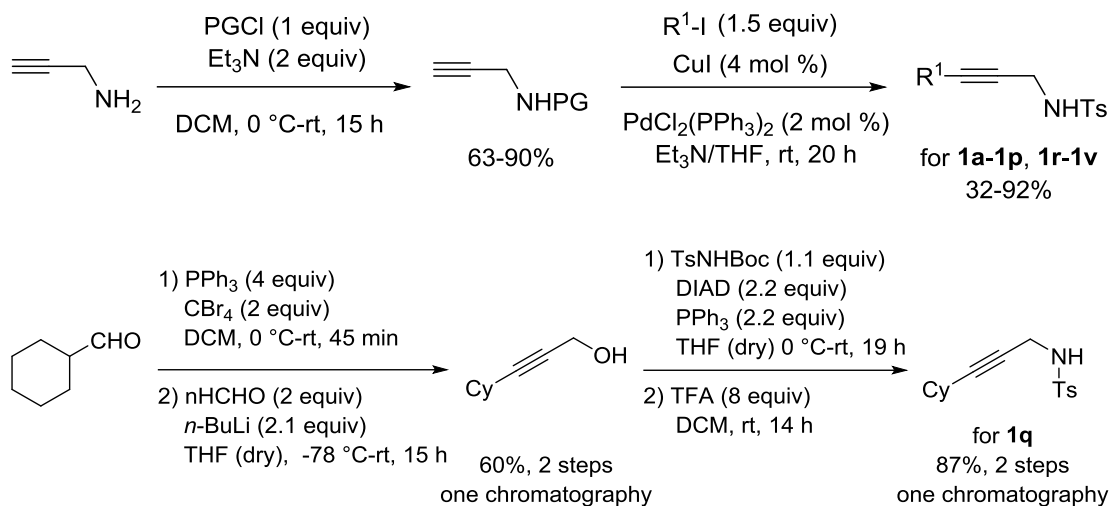

2. Alkenyl diynes 1a-1v were prepared according to the following procedures.<sup>2-3</sup>

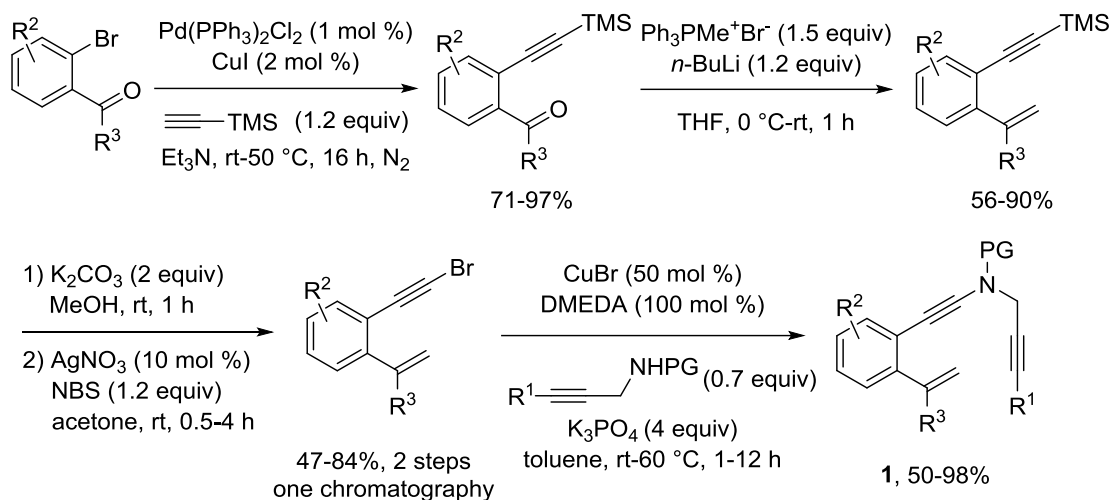

4-methyl-*N*-(3-phenylprop-2-yn-1-yl)-*N*-((2-vinylphenyl)ethynyl)benzenesulfonamide (1a)

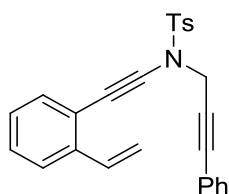

### 1a

The product **1a** was afforded as a pale yellow oil (74%, 304.1 mg). <sup>1</sup>H NMR (400 MHz, CDCl<sub>3</sub>) δ 7.91 (d, *J* = 8.4 Hz, 2H), 7.53 (d, *J* = 7.6 Hz, 1H), 7.39 (dd, *J* = 8.0, 1.2 Hz, 1H), 7.31 – 7.20 (m, 6H), 7.20 – 7.07 (m, 4H), 5.72 (dd, *J* = 17.6, 1.2 Hz, 1H), 5.11 (dd, *J* = 11.2, 1.2 Hz, 1H), 4.58 (s, 2H), 2.33 (s, 3H); <sup>13</sup>C NMR (100 MHz, CDCl<sub>3</sub>) δ 144.9, 138.9, 134.8, 134.2, 132.3, 131.6, 129.6, 128.6, 128.2, 128.1, 127.4, 124.4, 121.9, 121.3, 115.3, 86.5, 86.3, 81.1, 69.6, 42.9, 21.5; IR (neat): 3063, 2923, 2232, 1596, 1485, 1367, 1169, 1089, 920, 595; HRESIMS Calcd for [C<sub>26</sub>H<sub>21</sub>NNaO<sub>2</sub>S]<sup>+</sup> (M + Na<sup>+</sup>) 434.1185, found 434.1182.

### 4-methoxy-*N*-(3-phenylprop-2-yn-1-yl)-*N*-((2-vinylphenyl)ethynyl)benzenesulfonamide (**1b**)

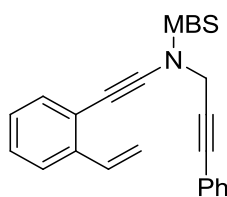

### 1b

The product **1b** was afforded as a pale yellow oil (81%, 345.9 mg). <sup>1</sup>H NMR (400 MHz, CDCl<sub>3</sub>) δ 7.99 – 7.90 (m, 2H), 7.51 (d, *J* = 8.0 Hz, 1H), 7.38 (dd, *J* = 7.6, 1.2 Hz, 1H), 7.29 – 7.09 (m, 8H), 6.92 – 6.82 (m, 2H), 5.72 (dd, *J* = 17.6, 0.8 Hz, 1H), 5.11 (dd, *J* = 10.8, 0.8 Hz, 1H), 4.55 (s, 2H), 3.68 (s, 3H); <sup>13</sup>C NMR (100 MHz, CDCl<sub>3</sub>) δ 163.7, 138.7, 134.6, 132.2, 131.5, 130.3, 128.5, 128.3, 127.9(9), 127.9(7), 127.3, 124.3, 121.7, 121.1, 115.2, 114.0, 86.4(1), 86.3(8), 81.2, 69.4, 55.4, 42.6; IR (neat): 2926, 2231, 1595, 1497, 1366, 1163, 1090, 920, 755, 593; HRESIMS Calcd for [C<sub>26</sub>H<sub>21</sub>NNaO<sub>3</sub>S]<sup>+</sup> (M + Na<sup>+</sup>) 450.1134, found 450.1130.

### *N*-(3-phenylprop-2-yn-1-yl)-*N*-((2-vinylphenyl)ethynyl)benzenesulfonamide (**1c**)

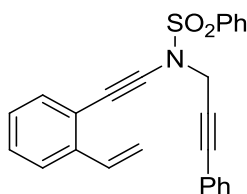

### 1c

The product **1c** was afforded as a pale yellow oil (98%, 389.1 mg).  $^1\text{H}$  NMR (400 MHz,  $\text{CDCl}_3$ )  $\delta$  8.04 (d,  $J = 7.2$  Hz, 2H), 7.66 – 7.44 (m, 4H), 7.39 (d,  $J = 7.2$  Hz, 1H), 7.35 – 7.04 (m, 8H), 5.72 (d,  $J = 17.2$  Hz, 1H), 5.10 (d,  $J = 10.8$  Hz, 1H), 4.61 (s, 2H);  $^{13}\text{C}$  NMR (100 MHz,  $\text{CDCl}_3$ )  $\delta$  138.9, 137.2, 134.8, 133.8, 132.4, 131.6, 129.0, 128.7, 128.2, 128.1, 127.4, 124.5, 121.8, 121.1, 115.4, 86.7, 86.0, 81.0, 69.7, 42.9; IR (neat): 2925, 2232, 1698, 1489, 1367, 1171, 1089, 920, 756, 596; HRESIMS Calcd for  $[\text{C}_{25}\text{H}_{19}\text{NNaO}_2\text{S}]^+$  ( $\text{M} + \text{Na}^+$ ) 420.1029, found 420.1025.

### *N*-(3-phenylprop-2-yn-1-yl)-*N*-((2-vinylphenyl)ethynyl)methanesulfonamide (**1d**)

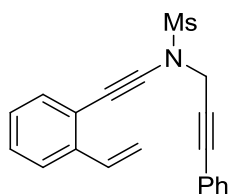

### 1d

The product **1d** was afforded as a pale yellow oil (75%, 251.3 mg).  $^1\text{H}$  NMR (400 MHz,  $\text{CDCl}_3$ )  $\delta$  7.58 – 7.53 (m, 1H), 7.49 – 7.41 (m, 3H), 7.37 – 7.16 (m, 6H), 5.78 (dd,  $J = 17.6, 0.8$  Hz, 1H), 5.23 (dd,  $J = 10.8, 0.8$  Hz, 1H), 4.62 (s, 2H), 3.26 (s, 3H);  $^{13}\text{C}$  NMR (100 MHz,  $\text{CDCl}_3$ )  $\delta$  139.0, 134.7, 132.3, 131.8, 129.1, 128.4, 128.3, 127.4, 124.6, 121.6, 120.8, 115.7, 87.1, 85.6, 81.5, 69.9, 42.9, 38.6; IR (neat): 2928, 2233, 1698, 1490, 1360, 1165, 1038, 920, 759, 517; HRESIMS Calcd for  $[\text{C}_{20}\text{H}_{17}\text{NNaO}_2\text{S}]^+$  ( $\text{M} + \text{Na}^+$ ) 358.0872, found 358.0874.

### 4-methyl-*N*-(3-(*p*-tolyl)prop-2-yn-1-yl)-*N*-((2-vinylphenyl)ethynyl)benzenesulfonamide (**1e**)

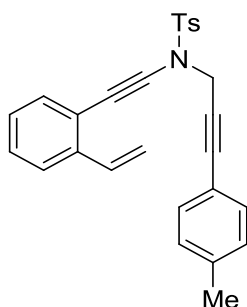

**1e**

The product **1e** was afforded as a pale yellow oil (98%, 416.5 mg). <sup>1</sup>H NMR (400 MHz, CDCl<sub>3</sub>) δ 7.91 (d, *J* = 8.0 Hz, 2H), 7.53 (d, *J* = 7.6 Hz, 1H), 7.39 (d, *J* = 7.2 Hz, 1H), 7.33 – 6.99 (m, 9H), 5.72 (d, *J* = 17.6 Hz, 1H), 5.12 (d, *J* = 10.8 Hz, 1H), 4.57 (s, 2H), 2.35 (s, 3H), 2.32 (s, 3H); <sup>13</sup>C NMR (100 MHz, CDCl<sub>3</sub>) δ 144.8, 138.9, 138.7, 134.9, 134.2, 132.3, 131.5, 129.6, 128.8, 128.2, 128.0, 127.3, 124.4, 121.3, 118.8, 115.3, 86.7, 86.3, 80.4, 69.6, 42.9, 21.5, 21.4; IR (neat): 2922, 2232, 1597, 1509, 1367, 1170, 1089, 919, 669, 588; HRESIMS Calcd for [C<sub>27</sub>H<sub>23</sub>NNaO<sub>2</sub>S]<sup>+</sup> (M + Na<sup>+</sup>) 448.1342, found 448.1340.

***N*-(3-(4-methoxyphenyl)prop-2-yn-1-yl)-4-methyl-*N*-((2-vinylphenyl)ethynyl)benzenesulfonamide (**1f**)**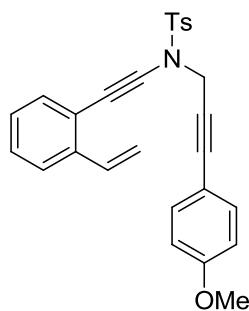**1f**

The product **1f** was afforded as a pale yellow oil (90%, 396.9 mg). <sup>1</sup>H NMR (400 MHz, CDCl<sub>3</sub>) δ 7.95 – 7.87 (m, 2H), 7.56 – 7.50 (m, 1H), 7.38 (dd, *J* = 7.6, 1.2 Hz, 1H), 7.30 – 7.07 (m, 7H), 6.81 – 6.72 (m, 2H), 5.73 (dd, *J* = 17.6, 0.8 Hz, 1H), 5.12 (dd, *J* = 10.8, 0.8 Hz, 1H), 4.56 (s, 2H), 3.77 (s, 3H), 2.35 (s, 3H); <sup>13</sup>C NMR (100 MHz, CDCl<sub>3</sub>) δ 159.8, 144.8, 138.8, 134.9, 134.2, 133.1, 132.3, 129.6, 128.2, 128.0, 127.3, 124.4, 121.3, 115.3, 114.0, 113.7, 86.5, 86.4, 79.7, 69.6, 55.2, 43.0, 21.5; IR (neat): 2924, 2232, 1605, 1509, 1366, 1292, 1249, 1168, 1088, 589; HRESIMS Calcd for [C<sub>27</sub>H<sub>23</sub>NNaO<sub>3</sub>S]<sup>+</sup> (M + Na<sup>+</sup>) 464.1291, found 464.1293.

***N*-(3-([1,1'-biphenyl]-4-yl)prop-2-yn-1-yl)-4-methyl-*N*-((2-vinylphenyl)ethynyl)benzenesulfonamide (**1g**)**

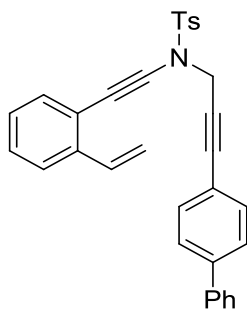

**1g**

The product **1g** was afforded as a pale yellow oil (96%, 467.5 mg).  $^1\text{H}$  NMR (400 MHz,  $\text{CDCl}_3$ )  $\delta$  7.97 – 7.87 (m, 2H), 7.64 – 7.05 (m, 16H), 5.73 (dd,  $J = 17.6, 0.8$  Hz, 1H), 5.14 (dd,  $J = 11.2, 0.8$  Hz, 1H), 4.58 (s, 2H), 2.31 (s, 3H);  $^{13}\text{C}$  NMR (100 MHz,  $\text{CDCl}_3$ )  $\delta$  144.9, 141.2, 139.9, 138.8, 134.8, 134.1, 132.3, 132.0, 129.6, 128.8, 128.2, 128.1, 127.7, 127.3, 126.8, 126.7, 124.4, 121.2, 120.7, 115.3, 86.4, 86.3, 81.8, 69.6, 42.8, 21.5; IR (neat): 3060, 2923, 2232, 1597, 1486, 1367, 1169, 1089, 919, 592; HRESIMS Calcd for  $[\text{C}_{32}\text{H}_{25}\text{NNaO}_2\text{S}]^+$  ( $\text{M} + \text{Na}^+$ ) 510.1498, found 510.1496.

***N*-(3-(4-fluorophenyl)prop-2-yn-1-yl)-4-methyl-*N*-((2-vinylphenyl)ethynyl)benzenesulfonamide (1h)**

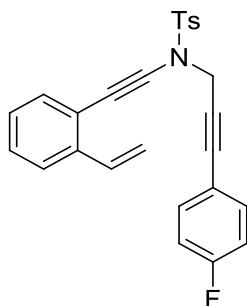

**1h**

The product **1h** was afforded as a pale yellow oil (69%, 296.1 mg).  $^1\text{H}$  NMR (400 MHz,  $\text{CDCl}_3$ )  $\delta$  7.90 (d,  $J = 8.0$  Hz, 2H), 7.51 (d,  $J = 8.0$  Hz, 1H), 7.38 (d,  $J = 7.6$  Hz, 1H), 7.31 – 7.05 (m, 7H), 6.99 – 6.85 (m, 2H), 5.73 (d,  $J = 17.6$  Hz, 1H), 5.11 (d,  $J = 10.8$  Hz, 1H), 4.55 (s, 2H), 2.31 (s, 3H);  $^{13}\text{C}$  NMR (100 MHz,  $\text{CDCl}_3$ )  $\delta$  162.4 (d,  $J = 249.0$  Hz), 144.8, 138.7, 134.6, 134.0, 133.5 (d,  $J = 8.0$  Hz), 132.1, 129.5, 128.1, 127.3, 124.3, 121.0, 117.8 (d,  $J = 3.0$  Hz), 115.3 (d,  $J = 22.0$  Hz), 115.2, 86.2, 85.3, 80.9, 69.5, 42.6, 21.3;  $^{19}\text{F}$  NMR (376 MHz,  $\text{CDCl}_3$ )  $\delta$  -110.1; IR (neat): 3064, 2924,



2232, 1599, 1368, 1231, 1171, 920, 670, 589; HRESIMS Calcd for  $[\text{C}_{26}\text{H}_{20}\text{FNNaO}_2\text{S}]^+$  ( $\text{M} + \text{Na}^+$ ) 452.1091, found 452.1094.

***N*-(3-(4-chlorophenyl)prop-2-yn-1-yl)-4-methyl-*N*-((2-vinylphenyl)ethynyl)benzenesulfonamide (1i)**

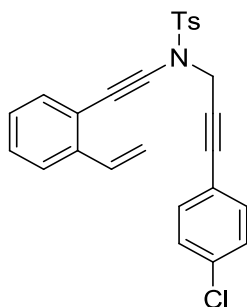

**1i**

The product **1i** was afforded as a pale yellow oil (79%, 351.6 mg).  $^1\text{H}$  NMR (400 MHz,  $\text{CDCl}_3$ )  $\delta$  7.90 (d,  $J = 7.6$  Hz, 2H), 7.52 (d,  $J = 8.0$  Hz, 1H), 7.38 (d,  $J = 7.6$  Hz, 1H), 7.30 – 7.03 (m, 9H), 5.73 (d,  $J = 17.6$  Hz, 1H), 5.12 (d,  $J = 11.2$  Hz, 1H), 4.56 (s, 2H), 2.33 (s, 3H);  $^{13}\text{C}$  NMR (100 MHz,  $\text{CDCl}_3$ )  $\delta$  144.9, 138.8, 134.7, 134.6, 134.1, 132.8, 132.2, 129.5, 128.4, 128.1(4), 128.1(0), 127.4, 124.4, 121.1, 120.3, 115.3, 86.1, 85.3, 82.2, 69.6, 42.7, 21.4; IR (neat): 2924, 2232, 1595, 1489, 1369, 1170, 1089, 920, 753, 600; HRESIMS Calcd for  $[\text{C}_{26}\text{H}_{20}\text{ClINNaO}_2\text{S}]^+$  ( $\text{M} + \text{Na}^+$ ) 468.0795, found 468.0792.

***N*-(3-(4-bromophenyl)prop-2-yn-1-yl)-4-methyl-*N*-((2-vinylphenyl)ethynyl)benzenesulfonamide (1j)**

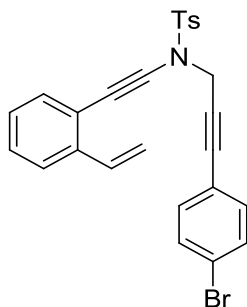

**1j**

The product **1j** was afforded as a pale yellow oil (92%, 449.9 mg).  $^1\text{H}$  NMR (400 MHz,  $\text{CDCl}_3$ )  $\delta$  7.90 (d,  $J = 8.4$  Hz, 2H), 7.52 (d,  $J = 7.6$  Hz, 1H), 7.41 – 7.32 (m, 3H), 7.30 – 7.20 (m, 3H), 7.20 – 7.06 (m, 2H), 7.01 (d,  $J = 8.4$  Hz, 2H), 5.73 (d,  $J = 17.6$  Hz, 1H), 5.12 (d,  $J = 10.8$  Hz, 1H), 4.55 (s, 2H), 2.34 (s, 3H);  $^{13}\text{C}$  NMR (100 MHz,  $\text{CDCl}_3$ )  $\delta$  144.9, 138.8, 134.8, 134.1, 133.0, 132.3, 131.3, 129.6, 128.2, 128.1, 127.4, 124.5, 122.9, 121.1, 120.8, 115.3, 86.2, 85.4, 82.4, 69.7, 42.7, 21.5; IR (neat): 3063, 2923, 2232, 1596, 1369, 1170, 1088, 920, 751, 662; HRESIMS Calcd for  $[\text{C}_{26}\text{H}_{20}\text{BrNNaO}_2\text{S}]^+$  ( $\text{M} + \text{Na}^+$ ) 512.0290, found 512.0293.

**4-methyl-*N*-(3-(*m*-tolyl)prop-2-yn-1-yl)-*N*-((2-vinylphenyl)ethynyl)benzenesulfonamide (**1k**)**

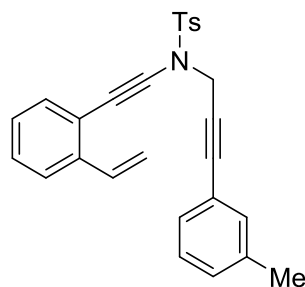

**1k**

The product **1k** was afforded as a pale yellow oil (93%, 395.3 mg).  $^1\text{H}$  NMR (400 MHz,  $\text{CDCl}_3$ )  $\delta$  7.96 – 7.87 (m, 2H), 7.53 (d,  $J = 7.6$  Hz, 1H), 7.39 (dd,  $J = 7.6, 1.2$  Hz, 1H), 7.30 – 7.20 (m, 3H), 7.20 – 7.06 (m, 4H), 7.01 – 6.93 (m, 2H), 5.73 (dd,  $J = 17.6, 0.8$  Hz, 1H), 5.12 (dd,  $J = 10.8, 0.8$  Hz, 1H), 4.57 (s, 2H), 2.34 (s, 3H), 2.27 (s, 3H);  $^{13}\text{C}$  NMR (100 MHz,  $\text{CDCl}_3$ )  $\delta$  144.8, 138.9, 137.7, 134.9, 134.2, 132.4, 132.2, 129.6, 129.5, 128.7, 128.2, 128.1, 128.0, 127.4, 124.4, 121.7, 121.3, 115.3, 86.8, 86.3, 80.7, 69.6, 42.9, 21.5, 21.1; IR (neat): 3059, 2922, 2232, 1597, 1484, 1367, 1170, 1089, 921, 594; HRESIMS Calcd for  $[\text{C}_{27}\text{H}_{23}\text{NNaO}_2\text{S}]^+$  ( $\text{M} + \text{Na}^+$ ) 448.1342, found 448.1340.

***N*-(3-(3-methoxyphenyl)prop-2-yn-1-yl)-4-methyl-*N*-((2-vinylphenyl)ethynyl)benzenesulfonamide (**1l**)**

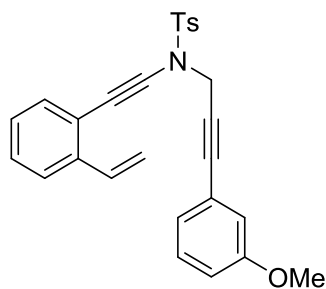

**1l**

The product **1a** was afforded as a pale yellow oil (89%, 392.5 mg).  $^1\text{H}$  NMR (400 MHz,  $\text{CDCl}_3$ )  $\delta$  7.90 (d,  $J = 8.4$  Hz, 2H), 7.50 (d,  $J = 7.6$  Hz, 1H), 7.38 (dd,  $J = 7.6$ , 1.2 Hz, 1H), 7.27 – 7.08 (m, 6H), 6.82 (dd,  $J = 8.4$ , 2.0 Hz, 1H), 6.78 – 6.73 (m, 1H), 6.71 – 6.66 (m, 1H), 5.72 (d,  $J = 17.6$  Hz, 1H), 5.13 (d,  $J = 10.8$  Hz, 1H), 4.56 (s, 2H), 3.69 (s, 3H), 2.30 (s, 3H);  $^{13}\text{C}$  NMR (100 MHz,  $\text{CDCl}_3$ )  $\delta$  159.0, 144.9, 138.7, 134.7, 134.0, 132.2, 129.5, 129.1, 128.0(3), 128.0(1), 127.3, 124.3, 123.9, 122.7, 121.1, 116.8, 115.3, 114.6, 86.4, 86.2, 80.8, 69.5, 55.0, 42.7, 21.3; IR (neat): 2926, 2232, 1596, 1480, 1368, 1290, 1169, 1046, 920, 685, 592; HRESIMS Calcd for  $[\text{C}_{27}\text{H}_{23}\text{NNaO}_3\text{S}]^+$  ( $\text{M} + \text{Na}^+$ ) 464.1291, found 464.1294.

***N*-(3-(2-methoxyphenyl)prop-2-yn-1-yl)-4-methyl-*N*-((2-vinylphenyl)ethynyl)benzenesulfonamide (**1m**)**

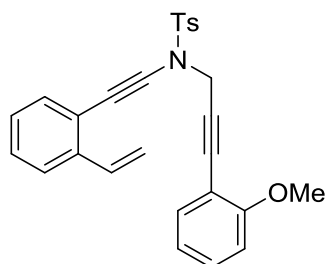

**1m**

The product **1m** was afforded as a pale yellow oil (98%, 432.2 mg).  $^1\text{H}$  NMR (400 MHz,  $\text{CDCl}_3$ )  $\delta$  7.91 (d,  $J = 8.4$  Hz, 2H), 7.51 (d,  $J = 7.6$  Hz, 1H), 7.37 (dd,  $J = 7.6$ , 0.8 Hz, 1H), 7.28 – 7.18 (m, 4H), 7.18 – 7.08 (m, 2H), 7.02 (dd,  $J = 8.0$ , 2.0 Hz, 1H), 6.83 – 6.74 (m, 2H), 5.71 (dd,  $J = 17.6$ , 1.2 Hz, 1H), 5.11 (dd,  $J = 11.2$ , 0.8 Hz, 1H), 4.62 (s, 2H), 3.73 (s, 3H), 2.30 (s, 3H);  $^{13}\text{C}$  NMR (100 MHz,  $\text{CDCl}_3$ )  $\delta$  159.9, 144.7, 138.7, 134.7, 134.0, 133.6, 132.1, 130.0, 129.4, 128.1, 127.9, 127.2, 124.3, 121.2,

120.0, 115.1, 110.9, 110.4, 86.2, 84.8, 83.1, 69.6, 55.4, 43.0, 21.4; IR (neat): 2927, 2232, 1596, 1493, 1366, 1265, 1169, 1089, 921, 753, 594; HRESIMS Calcd for  $[C_{27}H_{23}NNaO_3S]^+$  ( $M + Na^+$ ) 464.1291, found 464.1293.

***N*-(3-(3,4-dimethylphenyl)prop-2-yn-1-yl)-4-methyl-*N*-((2-vinylphenyl)ethynyl)benzenesulfonamide (**1n**)**

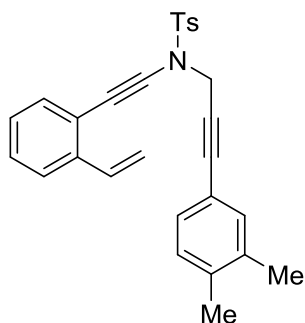

**1n**

The product **1n** was afforded as a pale yellow solid (96%, 421.4 mg; mp 84-85 °C).  $^1H$  NMR (400 MHz,  $CDCl_3$ )  $\delta$  7.91 (d,  $J = 8.0$  Hz, 2H), 7.53 (d,  $J = 7.6$  Hz, 1H), 7.39 (dd,  $J = 7.6, 1.2$  Hz, 1H), 7.31 – 7.20 (m, 3H), 7.20 – 7.08 (m, 2H), 7.03 – 6.96 (m, 1H), 6.97 – 6.88 (m, 2H), 5.73 (dd,  $J = 17.6, 0.8$  Hz, 1H), 5.13 (dd,  $J = 11.2, 0.8$  Hz, 1H), 4.57 (s, 2H), 2.36 (s, 3H), 2.22 (s, 3H), 2.18 (s, 3H);  $^{13}C$  NMR (100 MHz,  $CDCl_3$ )  $\delta$  144.8, 138.9, 137.5, 136.4, 134.9, 134.3, 132.7, 132.4, 129.6, 129.4, 129.1, 128.3, 128.0, 127.3, 124.5, 121.4, 119.2, 115.3, 86.9, 86.4, 80.1, 69.6, 43.0, 21.5, 19.7, 19.5; IR (neat): 2921, 2232, 1596, 1499, 1368, 1170, 1088, 921, 813, 670, 592; HRESIMS Calcd for  $[C_{28}H_{25}NNaO_2S]^+$  ( $M + Na^+$ ) 462.1498, found 462.1496.

**4-methyl-*N*-(3-(naphthalen-1-yl)prop-2-yn-1-yl)-*N*-((2-vinylphenyl)ethynyl)benzenesulfonamide (**1o**)**

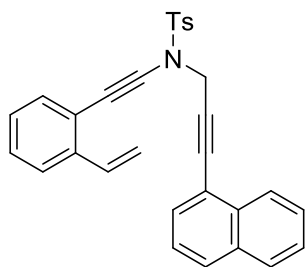

**1o**

The product **1o** was afforded as a pale yellow oil (96%, 442.6 mg). <sup>1</sup>H NMR (400 MHz, CDCl<sub>3</sub>) δ 7.97 – 7.87 (m, 3H), 7.75 (d, *J* = 8.4 Hz, 2H), 7.51 (d, *J* = 8.0 Hz, 1H), 7.45 – 7.37 (m, 3H), 7.35 – 7.10 (m, 5H), 7.06 (d, *J* = 8.4 Hz, 2H), 5.70 (dd, *J* = 17.6, 0.8 Hz, 1H), 5.09 (dd, *J* = 10.8, 0.8 Hz, 1H), 4.72 (s, 2H), 2.02 (s, 3H); <sup>13</sup>C NMR (100 MHz, CDCl<sub>3</sub>) δ 144.9, 138.8, 134.7, 133.9, 132.8(4), 132.8(0), 132.3, 130.5, 129.5, 129.0, 128.1, 128.0, 127.3, 126.6, 126.3, 125.9, 124.8, 124.4, 121.2, 119.5, 115.4, 86.4, 85.9, 84.8, 69.9, 43.1, 21.2; IR (neat): 3059, 2232, 1596, 1368, 1170, 1088, 918, 801, 773, 675, 594; HRESIMS Calcd for [C<sub>30</sub>H<sub>23</sub>NNaO<sub>2</sub>S]<sup>+</sup> (M + Na<sup>+</sup>) 484.1342, found 484.1344.

**4-methyl-*N*-(3-(thiophen-2-yl)prop-2-yn-1-yl)-*N*-((2-vinylphenyl)ethynyl)benzene sulfonamide (1p)**

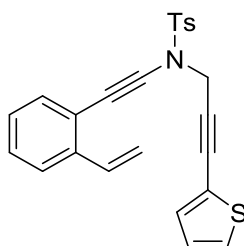

**1p**

The product **1p** was afforded as a pale yellow oil (96%, 400.3 mg). <sup>1</sup>H NMR (400 MHz, CDCl<sub>3</sub>) δ 7.90 (d, *J* = 8.4 Hz, 2H), 7.52 (d, *J* = 8.0 Hz, 1H), 7.38 (dd, *J* = 7.6, 0.8 Hz, 1H), 7.33 – 7.06 (m, 6H), 7.04 – 6.97 (m, 1H), 6.93 – 6.87 (m, 1H), 5.73 (d, *J* = 17.6 Hz, 1H), 5.16 (d, *J* = 11.2 Hz, 1H), 4.58 (s, 2H), 2.36 (s, 3H); <sup>13</sup>C NMR (100 MHz, CDCl<sub>3</sub>) δ 145.0, 138.9, 134.8, 134.0, 132.7, 132.3, 129.6, 128.1(2), 128.0(9), 127.6, 127.3, 126.8, 124.5, 121.7, 121.1, 115.3, 86.1, 85.0, 79.8, 69.7, 43.0, 21.6; IR (neat): 2922, 2229, 1367, 1168, 1089, 666, 594, 545; HRESIMS Calcd for [C<sub>24</sub>H<sub>19</sub>NNaO<sub>2</sub>S<sub>2</sub>]<sup>+</sup> (M + Na<sup>+</sup>) 440.0749, found 440.0751.

***N*-(3-cyclohexylprop-2-yn-1-yl)-4-methyl-*N*-((2-vinylphenyl)ethynyl)benzenesulfonamide (1q)**

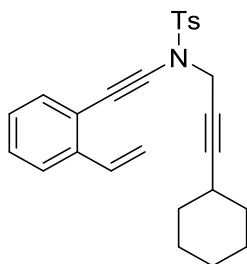

**1q**

The product **1q** was afforded as a pale yellow oil (84%, 350.3 mg).  $^1\text{H}$  NMR (400 MHz,  $\text{CDCl}_3$ )  $\delta$  7.92 – 7.84 (m, 2H), 7.58 – 7.51 (m, 1H), 7.37 (dd,  $J = 7.6, 0.8$  Hz, 1H), 7.34 – 7.29 (m, 2H), 7.28 – 7.21 (m, 1H), 7.21 – 7.08 (m, 2H), 5.78 (dd,  $J = 17.6, 1.2$  Hz, 1H), 5.27 (dd,  $J = 11.2, 1.2$  Hz, 1H), 4.35 (d,  $J = 2.0$  Hz, 2H), 2.42 (s, 3H), 2.26 – 2.12 (m, 1H), 1.63 – 1.48 (m, 4H), 1.47 – 1.36 (m, 1H), 1.27 – 1.10 (m, 5H);  $^{13}\text{C}$  NMR (100 MHz,  $\text{CDCl}_3$ )  $\delta$  144.6, 138.7, 135.0, 134.5, 132.2, 129.5, 128.1, 127.9, 127.3, 124.4, 121.5, 115.1, 91.4, 86.3, 71.9, 69.5, 42.4, 32.1, 28.7, 25.7, 24.5, 21.5; IR (neat): 2929, 2853, 2232, 1448, 1368, 1170, 1089, 922, 751, 661, 593; HRESIMS Calcd for  $[\text{C}_{26}\text{H}_{27}\text{NNaO}_2\text{S}]^+$  ( $\text{M} + \text{Na}^+$ ) 440.1655, found 440.1660.

**4-methyl-*N*-((5-methyl-2-vinylphenyl)ethynyl)-*N*-(3-phenylprop-2-yn-1-yl)benzenesulfonamide (1r)**

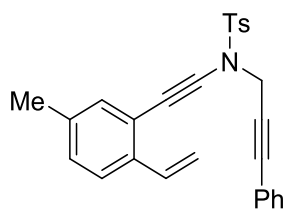

**1r**

The product **1r** was afforded as a pale yellow oil (82%, 341.9 mg).  $^1\text{H}$  NMR (400 MHz,  $\text{CDCl}_3$ )  $\delta$  7.90 (d,  $J = 8.4$  Hz, 2H), 7.41 (d,  $J = 8.0$  Hz, 1H), 7.29 – 7.17 (m, 6H), 7.17 – 7.05 (m, 3H), 7.05 – 6.99 (m, 1H), 5.67 (dd,  $J = 17.6, 1.2$  Hz, 1H), 5.05 (dd,  $J = 11.2, 1.2$  Hz, 1H), 4.55 (s, 2H), 2.29 (s, 3H), 2.24 (s, 3H);  $^{13}\text{C}$  NMR (100 MHz,  $\text{CDCl}_3$ )  $\delta$  144.8, 137.1, 136.0, 134.5, 134.1, 132.6, 131.5, 129.5, 129.0, 128.5, 128.1, 128.0, 124.3, 121.8, 120.9, 114.2, 86.5, 85.9, 81.1, 69.7, 42.7, 21.4, 20.7; IR (neat):

2922, 2235, 1700, 1490, 1364, 1168, 1089, 814, 758, 660, 591; HRESIMS Calcd for  $[C_{27}H_{23}NNaO_2S]^+$  ( $M + Na^+$ ) 448.1342, found 440.1340.

***N*-((5-methoxy-2-vinylphenyl)ethynyl)-4-methyl-*N*-(3-phenylprop-2-yn-1-yl)benzenesulfonamide (**1s**)**

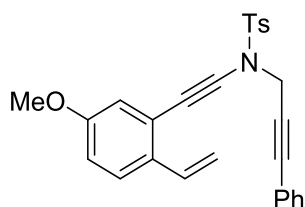

**1s**

The product **1s** was afforded as a pale yellow oil (95%, 403.8 mg).  $^1H$  NMR (400 MHz,  $CDCl_3$ )  $\delta$  7.95 – 7.88 (m, 2H), 7.46 (d,  $J = 8.8$  Hz, 1H), 7.32 – 7.20 (m, 5H), 7.19 – 7.13 (m, 2H), 7.05 (dd,  $J = 17.6, 10.8$  Hz, 1H), 6.89 (d,  $J = 2.8$  Hz, 1H), 6.82 (dd,  $J = 8.8, 2.8$  Hz, 1H), 5.59 (dd,  $J = 17.6, 0.8$  Hz, 1H), 4.99 (dd,  $J = 10.8, 0.8$  Hz, 1H), 4.58 (s, 2H), 3.74 (s, 3H), 2.33 (s, 3H);  $^{13}C$  NMR (100 MHz,  $CDCl_3$ )  $\delta$  158.6, 144.9, 134.2(0), 134.1(5), 131.9, 131.6, 129.6, 128.6, 128.2, 128.1, 125.7, 122.2, 121.9, 116.0, 115.4, 113.1, 86.6, 86.1, 81.1, 69.7, 55.3, 42.8, 21.5; IR (neat): 2930, 2236, 1600, 1490, 1366, 1168, 1089, 758, 660, 590; HRESIMS Calcd for  $[C_{27}H_{23}NNaO_3S]^+$  ( $M + Na^+$ ) 464.1291, found 464.1299.

***N*-((5-fluoro-2-vinylphenyl)ethynyl)-4-methyl-*N*-(3-phenylprop-2-yn-1-yl)benzenesulfonamide (**1t**)**

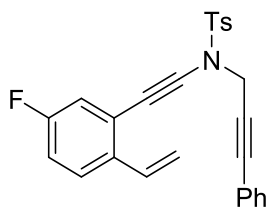

**1t**

The product **1t** was afforded as a pale yellow oil (93%, 399.0 mg).  $^1H$  NMR (400 MHz,  $CDCl_3$ )  $\delta$  7.94 – 7.86 (m, 2H), 7.51 – 7.43 (m, 1H), 7.31 – 7.20 (m, 5H), 7.19 – 7.13 (m, 2H), 7.12 – 7.01 (m, 2H), 6.98 – 6.89 (m, 1H), 5.65 (d,  $J = 17.6$  Hz, 1H),

5.10 (d,  $J = 11.2$  Hz, 1H), 4.57 (s, 2H), 2.33 (s, 3H);  $^{13}\text{C}$  NMR (100 MHz,  $\text{CDCl}_3$ )  $\delta$  161.6 (d,  $J = 246.0$  Hz), 145.1, 135.1 (d,  $J = 3.0$  Hz), 134.2, 133.8, 131.6, 129.7, 128.7, 128.1(3), 128.0(9), 126.2 (d,  $J = 9.0$  Hz), 122.9 (d,  $J = 10.0$  Hz), 121.8, 118.2 (d,  $J = 23.0$  Hz), 115.5 (d,  $J = 21.0$  Hz), 115.0, 87.2, 86.7, 80.9, 68.9, 42.7, 21.5;  $^{19}\text{F}$  NMR (376 MHz,  $\text{CDCl}_3$ )  $\delta$  -114.7; IR (neat): 2921, 2237, 1600, 1488, 1369, 1169, 662, 589, 544; HRESIMS Calcd for  $[\text{C}_{26}\text{H}_{20}\text{FNNaO}_2\text{S}]^+$  ( $\text{M} + \text{Na}^+$ ) 452.1091, found 452.1095.

***N*-((4,5-dimethoxy-2-vinylphenyl)ethynyl)-4-methyl-*N*-(3-phenylprop-2-yn-1-yl)benzenesulfonamide (**1u**)**

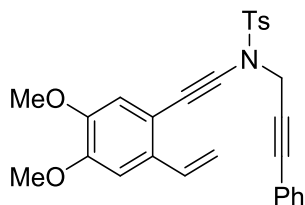

**1u**

The product **1u** was afforded as a pale yellow oil (80%, 376.8 mg).  $^1\text{H}$  NMR (400 MHz,  $\text{CDCl}_3$ )  $\delta$  7.91 (d,  $J = 8.0$  Hz, 2H), 7.33 – 6.97 (m, 9H), 6.85 (s, 1H), 5.60 (d,  $J = 17.6$  Hz, 1H), 4.99 (d,  $J = 10.8$  Hz, 1H), 4.57 (s, 2H), 3.87 (s, 3H), 3.78 (s, 3H), 2.32 (s, 3H);  $^{13}\text{C}$  NMR (100 MHz,  $\text{CDCl}_3$ )  $\delta$  149.4, 148.3, 144.7, 134.3, 134.0, 132.9, 131.4, 129.4, 128.4, 128.1, 127.9, 121.7, 114.5, 113.4, 113.1, 106.5, 86.4, 84.8, 81.2, 69.2, 55.6(3), 55.6(0), 42.8, 21.3; IR (neat): 2928, 2235, 1598, 1361, 1266, 1212, 1167, 1089, 663, 588; HRESIMS Calcd for  $[\text{C}_{28}\text{H}_{25}\text{NNaO}_4\text{S}]^+$  ( $\text{M} + \text{Na}^+$ ) 494.1397, found 494.1395.

**4-methyl-*N*-(3-phenylprop-2-yn-1-yl)-*N*-((2-(prop-1-en-2-yl)phenyl)ethynyl)benzenesulfonamide (**1v**)**



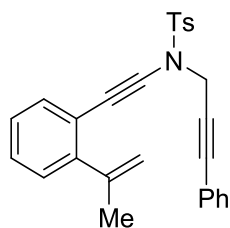

**1v**

The product **1v** was afforded as a pale yellow oil (90%, 382.5 mg).  $^1\text{H}$  NMR (400 MHz,  $\text{CDCl}_3$ )  $\delta$  7.79 (d,  $J = 8.4$  Hz, 2H), 7.28 (d,  $J = 7.6$  Hz, 1H), 7.17 – 6.97 (m, 10H), 5.08 – 4.92 (m, 2H), 4.41 (s, 2H), 2.18 (s, 3H), 1.98 (s, 3H);  $^{13}\text{C}$  NMR (100 MHz,  $\text{CDCl}_3$ )  $\delta$  145.3, 144.7, 144.6, 134.3, 132.5, 131.4, 129.4, 128.4, 128.0, 127.9, 127.7, 127.6, 126.6, 121.8, 120.0, 115.6, 86.2, 85.0, 81.2, 70.4, 42.7, 23.2, 21.3; IR (neat): 3061, 2919, 2232, 1597, 1490, 1368, 1170, 1038, 916, 757, 593; HRESIMS Calcd for  $[\text{C}_{27}\text{H}_{23}\text{NNaO}_2\text{S}]^+$  ( $\text{M} + \text{Na}^+$ ) 448.1342, found 448.1346.

**(E)-4-methyl-N-(3-phenylprop-2-yn-1-yl)-N-((2-styrylphenyl)ethynyl)benzenesulfonamide (1w)**

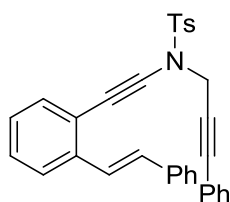

**1w**

The product **1w** was afforded as a pale yellow oil (93%, 273.0 mg).  $^1\text{H}$  NMR (400 MHz,  $\text{CDCl}_3$ )  $\delta$  7.89 (d,  $J = 8.4$  Hz, 2H), 7.68 (d,  $J = 8.0$  Hz, 1H), 7.66 – 7.58 (m, 1H), 7.53 – 7.45 (m, 2H), 7.45 – 7.38 (m, 1H), 7.33 – 7.26 (m, 2H), 7.23 – 7.10 (m, 11H), 4.62 (s, 2H), 2.23 (s, 3H);  $^{13}\text{C}$  NMR (100 MHz,  $\text{CDCl}_3$ )  $\delta$  144.8, 138.6, 137.1, 134.3, 132.3, 131.6, 130.4, 129.6, 128.5, 128.1, 127.7, 127.1, 126.8, 126.4, 124.6, 121.8, 121.5, 86.7, 86.5, 81.0, 69.8, 42.8, 21.4; IR (neat): 3059, 3030, 2231, 1596, 1367, 1169, 1088, 758, 690, 592; HRESIMS Calcd for  $[\text{C}_{32}\text{H}_{25}\text{NNaO}_2\text{S}]^+$  ( $\text{M} + \text{Na}^+$ ) 510.1498, found 510.1500.

### 3. General procedure for the synthesis of tetrahydrobenzo[*e*]cyclopropa[*g*]isoindol-1(3*bH*)-ones **2**.

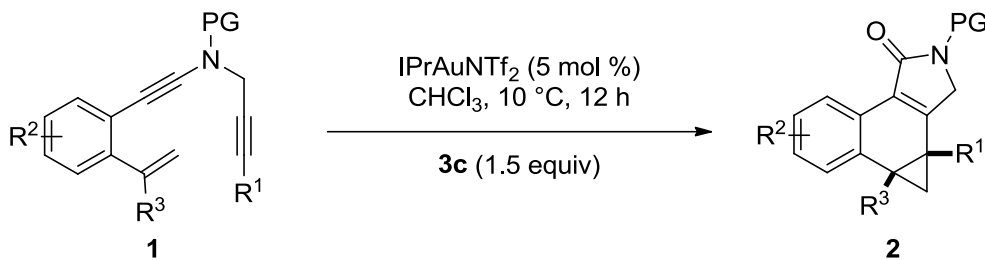

Compound **3c** (0.3 mmol, 49.2 mg) was added to a solution of the diyne **1** (0.2 mmol) in CHCl<sub>3</sub> (2 ml) at 10 °C temperature, then IPrAuNTf<sub>2</sub> (0.01 mmol, 8.7 mg) was added into the mixture. Next, the reaction was stirred at 10 °C for about 12 h and the progress of the reaction was monitored by TLC. Upon completed, the mixture was evaporated in vacuum. The residue was purified by flash chromatography on silica gel (eluent: PE/EtOAc) to afford the desired product **2**.

#### 3*b*-phenyl-2-tosyl-2,3,4,4*a*-tetrahydrobenzo[*e*]cyclopropa[*g*]isoindol-1(3*bH*)-one (**1a**)

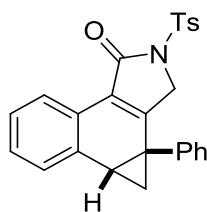

**2a**

Compound **2a** was prepared in 71% yield (60.6 mg) according to the general procedure. Pale yellow solid (mp 121-123 °C). <sup>1</sup>H NMR (400 MHz, CDCl<sub>3</sub>) δ 8.49 (d, *J* = 7.6 Hz, 1H), 7.95 (d, *J* = 8.4 Hz, 2H), 7.45 – 7.18 (m, 10H), 4.48 (d, *J* = 19.2 Hz, 1H), 4.11 (d, *J* = 19.2 Hz, 1H), 2.83 (dd, *J* = 9.2, 5.6 Hz, 1H), 2.39 (s, 3H), 2.28 (dd, *J* = 9.2, 4.0 Hz, 1H), 0.46 – 0.35 (m, 1H); <sup>13</sup>C NMR (100 MHz, CDCl<sub>3</sub>) δ 166.9, 156.5, 144.9, 139.4, 135.5, 134.9, 129.6, 129.5, 129.0, 128.5, 128.1, 128.0, 127.6, 126.4, 124.4, 124.2, 121.9, 50.7, 31.8, 31.6, 21.6, 16.8; IR (neat): 2924, 1720, 1579, 1493, 1365, 1243, 1170, 1091, 676, 582, 545; HRESIMS Calcd for [C<sub>26</sub>H<sub>21</sub>NNaO<sub>3</sub>S]<sup>+</sup> (M + Na<sup>+</sup>) 450.1134, found 450.1135.

**2-((4-methoxyphenyl)sulfonyl)-3b-phenyl-2,3,4,4a-tetrahydrobenzo[e]cyclopropa  
[g]isoindol-1(3bH)-one (2b)**

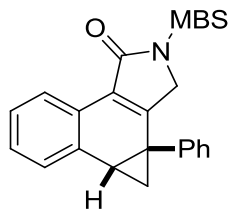

**2b**

Compound **2b** was prepared in 69% yield (61.1 mg) according to the general procedure. Pale yellow oil.  $^1\text{H}$  NMR (400 MHz,  $\text{CDCl}_3$ )  $\delta$  8.54 – 8.43 (m, 1H), 8.01 (d,  $J = 8.8$  Hz, 2H), 7.45 – 7.21 (m, 8H), 6.97 (d,  $J = 8.8$  Hz, 2H), 4.48 (d,  $J = 19.2$  Hz, 1H), 4.10 (d,  $J = 19.2$  Hz, 1H), 3.84 (s, 3H), 2.84 (dd,  $J = 9.2, 5.6$  Hz, 1H), 2.29 (dd,  $J = 9.2, 4.0$  Hz, 1H), 0.43 (dd,  $J = 5.6, 4.0$  Hz, 1H);  $^{13}\text{C}$  NMR (100 MHz,  $\text{CDCl}_3$ )  $\delta$  167.0, 163.9, 156.4, 139.6, 134.9, 130.4, 130.1, 129.6, 129.0, 128.6, 128.2, 127.7, 126.5, 124.5, 124.3, 122.0, 114.2, 55.6, 50.7, 31.9, 31.7, 16.9; IR (neat): 3062, 2929, 1717, 1594, 1496, 1361, 1262, 1162, 1091, 677, 583; HRESIMS Calcd for  $[\text{C}_{26}\text{H}_{21}\text{NNaO}_4\text{S}]^+$  ( $\text{M} + \text{Na}^+$ ) 466.1083, found 466.1086.

**3b-phenyl-2-(phenylsulfonyl)-2,3,4,4a-tetrahydrobenzo[e]cyclopropa[g]isoindol-1  
(3bH)-one (2c)**

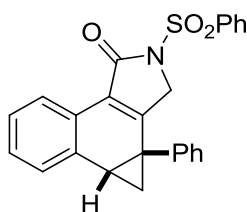

**2c**

Compound **2c** was prepared in 73% yield (60.3 mg) according to the general procedure. Pale yellow oil.  $^1\text{H}$  NMR (400 MHz,  $\text{CDCl}_3$ )  $\delta$  8.53 – 8.45 (m, 1H), 8.11 – 8.04 (m, 2H), 7.66 – 7.58 (m, 1H), 7.57 – 7.48 (m, 2H), 7.45 – 7.23 (m, 8H), 4.50 (d,  $J = 19.2$  Hz, 1H), 4.12 (d,  $J = 19.2$  Hz, 1H), 2.85 (dd,  $J = 9.2, 5.6$  Hz, 1H), 2.29 (dd,  $J = 9.2, 4.0$  Hz, 1H), 0.44 (dd,  $J = 5.6, 4.0$  Hz, 1H);  $^{13}\text{C}$  NMR (100 MHz,  $\text{CDCl}_3$ )  $\delta$

166.9, 156.6, 139.5, 138.5, 134.9, 133.8, 129.6, 129.1, 128.6, 128.2, 128.0, 127.7, 126.5, 124.4, 124.2, 121.9, 50.8, 31.9, 31.7, 16.9; IR (neat): 3064, 1719, 1492, 1447, 1362, 1170, 1117, 1091, 604, 588, 567; HRESIMS Calcd for  $[C_{25}H_{19}NNaO_3S]^+$  ( $M + Na^+$ ) 436.0978, found 436.0980.

**2-(methylsulfonyl)-3b-phenyl-2,3,4,4a-tetrahydrobenzo[e]cyclopropa[g]isoindol-1(3bH)-one (2d)**

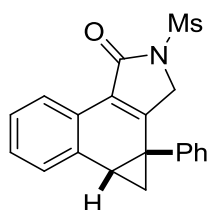

**2d**

Compound **2d** was prepared in 60% yield (42.1 mg) according to the general procedure. Pale yellow solid. (mp 169-171 °C).  $^1H$  NMR (400 MHz,  $CDCl_3$ )  $\delta$  8.57 – 8.51 (m, 1H), 7.50 – 7.44 (m, 1H), 7.40 – 7.29 (m, 7H), 4.46 (d,  $J = 19.2$  Hz, 1H), 4.08 (d,  $J = 19.2$  Hz, 1H), 3.34 (s, 3H), 2.90 (dd,  $J = 9.2, 5.6$  Hz, 1H), 2.34 (dd,  $J = 9.2, 4.4$  Hz, 1H), 0.49 (dd,  $J = 5.6, 4.4$  Hz, 1H);  $^{13}C$  NMR (100 MHz,  $CDCl_3$ )  $\delta$  168.1, 157.1, 139.4, 135.0, 129.6, 129.1, 128.7, 128.3, 127.8, 126.7, 124.4, 124.2, 121.9, 50.1, 41.0, 32.0, 31.8, 17.0; IR (neat): 2927, 1715, 1493, 1446, 1349, 1167, 1119, 1044, 701, 570, 543; HRESIMS Calcd for  $[C_{20}H_{17}NNaO_3S]^+$  ( $M + Na^+$ ) 374.0821, found 374.0825.

**3b-(p-tolyl)-2-tosyl-2,3,4,4a-tetrahydrobenzo[e]cyclopropa[g]isoindol-1(3bH)-one (2e)**

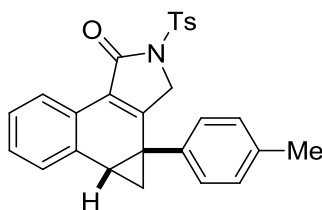

**2e**

Compound **2e** was prepared in 71% yield (62.6 mg) according to the general procedure. Pale yellow oil.  $^1\text{H}$  NMR (400 MHz,  $\text{CDCl}_3$ )  $\delta$  8.53 – 8.43 (m, 1H), 7.95 (d,  $J = 8.4$  Hz, 2H), 7.43 – 7.37 (m, 1H), 7.34 – 7.13 (m, 8H), 4.47 (d,  $J = 19.2$  Hz, 1H), 4.11 (d,  $J = 19.2$  Hz, 1H), 2.80 (dd,  $J = 9.2, 5.6$  Hz, 1H), 2.40 (s, 3H), 2.37 (s, 3H), 2.26 (dd,  $J = 9.2, 4.0$  Hz, 1H), 0.38 (dd,  $J = 5.6, 4.0$  Hz, 1H);  $^{13}\text{C}$  NMR (100 MHz,  $\text{CDCl}_3$ )  $\delta$  167.0, 156.9, 144.9, 138.0, 136.6, 135.6, 135.0, 129.7, 129.6, 129.4, 128.5, 128.0, 127.6, 126.4, 124.4, 124.2, 121.8, 50.7, 31.8, 31.6, 21.6, 21.1, 17.0; IR (neat): 3028, 2922, 1720, 1597, 1493, 1362, 1170, 1091, 675, 582, 545; HRESIMS Calcd for  $[\text{C}_{27}\text{H}_{23}\text{NNaO}_3\text{S}]^+$  ( $\text{M} + \text{Na}^+$ ) 464.1291, found 464.1292.

**3b-(4-methoxyphenyl)-2-tosyl-2,3,4,4a-tetrahydrobenzo[e]cyclopropa[g]isoindol-1(3bH)-one (2f)**

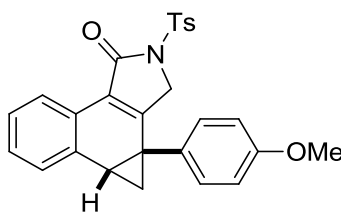

**2f**

Compound **2f** was prepared in 70% yield (64.0 mg) according to the general procedure. Pale yellow oil.  $^1\text{H}$  NMR (400 MHz,  $\text{CDCl}_3$ )  $\delta$  8.48 (dd,  $J = 7.6, 1.6$  Hz, 1H), 7.95 (d,  $J = 8.4$  Hz, 2H), 7.41 (dd,  $J = 7.6, 1.6$  Hz, 1H), 7.35 – 7.21 (m, 6H), 6.93 – 6.85 (m, 2H), 4.47 (d,  $J = 19.2$  Hz, 1H), 4.10 (d,  $J = 19.2$  Hz, 1H), 3.83 (s, 3H), 2.81 (dd,  $J = 9.2, 5.6$  Hz, 1H), 2.41 (s, 3H), 2.25 (dd,  $J = 9.2, 4.0$  Hz, 1H), 0.39 (dd,  $J = 5.6, 4.0$  Hz, 1H);  $^{13}\text{C}$  NMR (100 MHz,  $\text{CDCl}_3$ )  $\delta$  167.0, 159.5, 157.0, 144.9, 135.7, 135.1, 131.8, 130.7, 129.7, 128.5, 128.1, 127.6, 126.5, 124.5, 124.3, 121.8, 114.4, 55.4, 50.8, 32.0, 31.3, 21.6, 17.2; IR (neat): 2922, 1513, 1369, 1246, 1172, 1093, 1060, 669, 608, 582, 538; HRESIMS Calcd for  $[\text{C}_{27}\text{H}_{23}\text{NNaO}_4\text{S}]^+$  ( $\text{M} + \text{Na}^+$ ) 480.1240, found 480.1244.

**3b-([1,1'-biphenyl]-4-yl)-2-tosyl-2,3,4,4a-tetrahydrobenzo[e]cyclopropa[g]isoindol-1(3bH)-one (2g)**

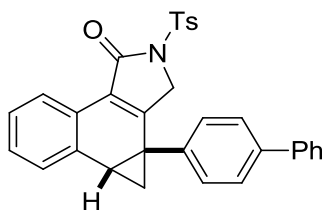

**2g**

Compound **2g** was prepared in 65% yield (65.4 mg) according to the general procedure. Pale yellow oil.  $^1\text{H}$  NMR (400 MHz,  $\text{CDCl}_3$ )  $\delta$  8.54 – 8.46 (m, 1H), 7.96 (d,  $J = 8.4$  Hz, 2H), 7.62 – 7.55 (m, 4H), 7.50 – 7.19 (m, 10H), 4.52 (d,  $J = 19.2$  Hz, 1H), 4.19 (d,  $J = 19.2$  Hz, 1H), 2.86 (dd,  $J = 9.2, 5.6$  Hz, 1H), 2.39 (s, 3H), 2.31 (dd,  $J = 9.2, 4.4$  Hz, 1H), 0.44 (dd,  $J = 5.6, 4.4$  Hz, 1H);  $^{13}\text{C}$  NMR (100 MHz,  $\text{CDCl}_3$ )  $\delta$  167.0, 156.4, 144.9, 141.2, 140.2, 138.4, 135.6, 134.9, 130.0, 129.7, 128.8, 128.6, 128.0, 127.7(1), 127.6(7), 127.6, 127.1, 126.5, 124.5, 124.2, 122.0, 50.8, 31.8, 31.5, 21.6, 16.9; IR (neat): 3029, 2922, 1719, 1597, 1489, 1362, 1169, 1091, 675, 600, 582, 545; HRESIMS Calcd for  $[\text{C}_{32}\text{H}_{25}\text{NNaO}_3\text{S}]^+$  ( $\text{M} + \text{Na}^+$ ) 526.1447, found 526.1450.

**3b-(4-fluorophenyl)-2-tosyl-2,3,4,4a-tetrahydrobenzo[e]cyclopropa[g]isoindol-1(3bH)-one (2h)**

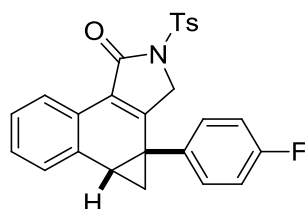

**2h**

Compound **2h** was prepared in 72% yield (64.1 mg) according to the general procedure. Pale yellow oil.  $^1\text{H}$  NMR (400 MHz,  $\text{CDCl}_3$ )  $\delta$  8.48 (d,  $J = 7.2$  Hz, 1H), 7.95 (d,  $J = 8.4$  Hz, 2H), 7.45 – 7.38 (m, 1H), 7.36 – 7.20 (m, 6H), 7.11 – 7.01 (m, 2H), 4.47 (d,  $J = 19.2$  Hz, 1H), 4.08 (d,  $J = 19.2$  Hz, 1H), 2.82 (dd,  $J = 9.2, 5.6$  Hz, 1H), 2.40 (s, 3H), 2.24 (dd,  $J = 9.2, 4.0$  Hz, 1H), 0.46 – 0.39 (m, 1H);  $^{13}\text{C}$  NMR (100 MHz,  $\text{CDCl}_3$ )  $\delta$  166.8, 162.4 (d,  $J = 246.0$  Hz), 155.9, 145.0, 135.5(4), 135.4(5) (d,  $J = 4.0$  Hz), 134.7, 131.3 (d,  $J = 9.0$  Hz), 129.7, 128.6, 128.0, 127.6, 126.6, 124.5, 124.1, 122.1, 116.0 (d,  $J = 21.0$  Hz), 50.6, 31.7, 31.0, 21.6, 17.1;  $^{19}\text{F}$  NMR (376 MHz,

CDCl<sub>3</sub>)  $\delta$  -113.0; IR (neat): 2924, 1720, 1597, 1511, 1362, 1222, 1170, 1091, 675, 582, 545; HRESIMS Calcd for [C<sub>26</sub>H<sub>20</sub>FNNaO<sub>3</sub>S]<sup>+</sup> (M + Na<sup>+</sup>) 468.1040, found 468.1045.

**3b-(4-chlorophenyl)-2-tosyl-2,3,4,4a-tetrahydrobenzo[e]cyclopropa[g]isoindol-1(3bH)-one (2i)**

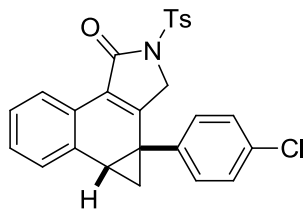

**2i**

Compound **2i** was prepared in 82% yield (75.6 mg) according to the general procedure. Pale yellow oil. <sup>1</sup>H NMR (400 MHz, CDCl<sub>3</sub>)  $\delta$  8.54 – 8.43 (m, 1H), 7.95 (d, *J* = 8.0 Hz, 2H), 7.46 – 7.19 (m, 9H), 4.47 (d, *J* = 19.2 Hz, 1H), 4.09 (d, *J* = 19.2 Hz, 1H), 2.82 (dd, *J* = 9.6, 5.6 Hz, 1H), 2.41 (s, 3H), 2.24 (dd, *J* = 9.6, 4.4 Hz, 1H), 0.44 (dd, *J* = 5.6, 4.4 Hz, 1H); <sup>13</sup>C NMR (100 MHz, CDCl<sub>3</sub>)  $\delta$  166.8, 155.5, 145.0, 138.0, 135.5, 134.6, 134.3, 131.0, 129.7, 129.3, 128.7, 128.1, 127.7, 126.7, 124.5, 124.1, 122.3, 50.6, 31.7, 31.1, 21.6, 16.9; IR (neat): 2922, 1719, 1491, 1362, 1169, 1118, 1091, 1013, 679, 582, 545; HRESIMS Calcd for [C<sub>26</sub>H<sub>20</sub>ClNNaO<sub>3</sub>S]<sup>+</sup> (M + Na<sup>+</sup>) 484.0745, found 484.0743.

**3b-(4-bromophenyl)-2-tosyl-2,3,4,4a-tetrahydrobenzo[e]cyclopropa[g]isoindol-1(3bH)-one (2j)**

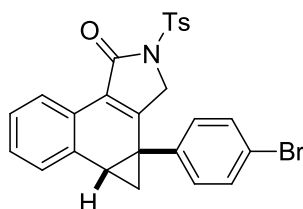

**2j**

Compound **2j** was prepared in 70% yield (70.7 mg) according to the general procedure. Pale yellow oil. <sup>1</sup>H NMR (400 MHz, CDCl<sub>3</sub>)  $\delta$  8.48 (dd, *J* = 7.6, 1.2 Hz,

1H), 7.95 (d,  $J = 8.0$  Hz, 2H), 7.55 – 7.46 (m, 2H), 7.41 (dd,  $J = 7.6, 1.2$  Hz, 1H), 7.36 – 7.17 (m, 6H), 4.47 (d,  $J = 19.2$  Hz, 1H), 4.09 (d,  $J = 19.2$  Hz, 1H), 2.82 (dd,  $J = 9.2, 5.6$  Hz, 1H), 2.41 (s, 3H), 2.24 (dd,  $J = 9.2, 4.4$  Hz, 1H), 0.44 (dd,  $J = 5.6, 4.4$  Hz, 1H);  $^{13}\text{C}$  NMR (100 MHz,  $\text{CDCl}_3$ )  $\delta$  166.8, 155.4, 145.0, 138.5, 135.5, 134.6, 132.2, 131.3, 129.7, 128.7, 128.1, 127.7, 126.7, 124.5, 124.1, 122.4, 122.3, 50.6, 31.7, 31.1, 21.6, 16.8; IR (neat): 2925, 1733, 1596, 1489, 1361, 1169, 1118, 1091, 667, 583, 546; HRESIMS Calcd for  $[\text{C}_{26}\text{H}_{20}\text{BrNNaO}_3\text{S}]^+$  ( $\text{M} + \text{Na}^+$ ) 528.0239, found 528.0237.

**3b-(*m*-tolyl)-2-tosyl-2,3,4,4a-tetrahydrobenzo[*e*]cyclopropa[*g*]isoindol-1(3b*H*)-one (2k)**

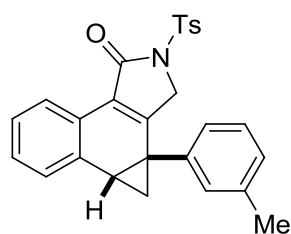

**2k**

Compound **2k** was prepared in 69% yield (60.9 mg) according to the general procedure. Pale yellow oil.  $^1\text{H}$  NMR (400 MHz,  $\text{CDCl}_3$ )  $\delta$  8.53 – 8.44 (m, 1H), 7.96 (d,  $J = 8.0$  Hz, 2H), 7.46 – 7.38 (m, 1H), 7.36 – 7.21 (m, 5H), 7.19 – 7.07 (m, 3H), 4.48 (d,  $J = 19.2$  Hz, 1H), 4.13 (d,  $J = 19.2$  Hz, 1H), 2.82 (dd,  $J = 9.6, 5.6$  Hz, 1H), 2.41 (s, 3H), 2.36 (s, 3H), 2.27 (dd,  $J = 9.6, 4.4$  Hz, 1H), 0.41 (dd,  $J = 5.6, 4.4$  Hz, 1H);  $^{13}\text{C}$  NMR (100 MHz,  $\text{CDCl}_3$ )  $\delta$  167.0, 156.8, 144.9, 139.5, 138.8, 135.7, 135.0, 130.3, 129.7, 129.0, 128.9, 128.5, 128.1, 127.7, 126.6, 126.5, 124.5, 124.3, 121.9, 50.8, 31.9, 31.7, 21.6, 21.3, 16.9; IR (neat): 2923, 2854, 1720, 1597, 1492, 1362, 1170, 1091, 676, 582, 544; HRESIMS Calcd for  $[\text{C}_{27}\text{H}_{23}\text{NNaO}_3\text{S}]^+$  ( $\text{M} + \text{Na}^+$ ) 464.1291, found 464.1293.

**3b-(3-methoxyphenyl)-2-tosyl-2,3,4,4a-tetrahydrobenzo[*e*]cyclopropa[*g*]isoindol-1(3b*H*)-one (2l)**



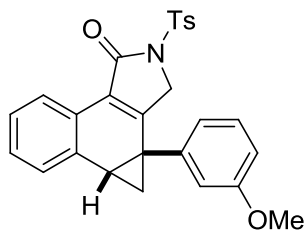

**2l**

Compound **2l** was prepared in 75% yield (68.6 mg) according to the general procedure. Pale yellow oil.  $^1\text{H}$  NMR (400 MHz,  $\text{CDCl}_3$ )  $\delta$  8.48 (dd,  $J = 7.6, 1.6$  Hz, 1H), 7.95 (d,  $J = 8.4$  Hz, 2H), 7.41 (dd,  $J = 7.6, 1.6$  Hz, 1H), 7.36 – 7.17 (m, 5H), 6.95 – 6.79 (m, 3H), 4.49 (d,  $J = 19.2$  Hz, 1H), 4.14 (d,  $J = 19.2$  Hz, 1H), 3.80 (s, 3H), 2.84 (dd,  $J = 9.6, 5.6$  Hz, 1H), 2.40 (s, 3H), 2.27 (dd,  $J = 9.6, 4.4$  Hz, 1H), 0.40 (dd,  $J = 5.6, 4.4$  Hz, 1H);  $^{13}\text{C}$  NMR (100 MHz,  $\text{CDCl}_3$ )  $\delta$  167.0, 160.0, 156.5, 144.9, 140.9, 135.5, 134.9, 130.1, 129.7, 128.5, 128.0, 127.7, 126.5, 124.4, 124.2, 121.9, 121.8, 115.4, 113.4, 55.3, 50.7, 31.9, 31.6, 21.6, 16.9; IR (neat): 2923, 1719, 1597, 1489, 1362, 1329, 1169, 1091, 676, 582, 545; HRESIMS Calcd for  $[\text{C}_{27}\text{H}_{23}\text{NNaO}_4\text{S}]^+$  ( $\text{M} + \text{Na}^+$ ) 480.1240, found 480.1244.

**3b-(2-methoxyphenyl)-2-tosyl-2,3,4,4a-tetrahydrobenzo[*e*]cyclopropa[*g*]isoindol-1(3*bH*)-one (2m)**

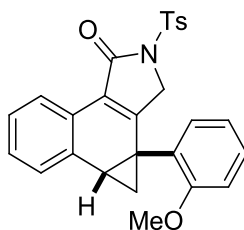

**2m**

Compound **2m** was prepared in 72% yield (65.8 mg) according to the general procedure. Pale yellow solid. (mp 215-217 °C).  $^1\text{H}$  NMR (500 MHz,  $\text{CDCl}_3$ )  $\delta$  8.47 (d,  $J = 7.5$  Hz, 1H), 7.94 (d,  $J = 8.5$  Hz, 2H), 7.41 (d,  $J = 7.0$  Hz, 1H), 7.36 – 7.20 (m, 6H), 6.99 – 6.86 (m, 2H), 4.86 – 4.20 (m, 1H), 4.05 (d,  $J = 19.0$  Hz, 1H), 3.96 – 3.48 (m, 3H), 3.04 – 2.54 (m, 1H), 2.40 (s, 3H), 2.32 – 1.97 (m, 1H), 0.61 – 0.27 (m, 1H);  $^{13}\text{C}$  NMR (125 MHz,  $\text{CDCl}_3$ )  $\delta$  167.3, 158.7, 158.1, 144.8, 135.7, 135.5, 129.7, 129.6, 128.1, 128.0, 127.5, 126.2, 124.4, 124.2, 120.9, 120.6, 110.8, 55.4, 50.7, 31.7, 28.2,

21.6; IR (neat): 3060, 2925, 1719, 1598, 1492, 1362, 1170, 1091, 937, 676, 583; HRESIMS Calcd for  $[C_{27}H_{23}NNaO_4S]^+$  ( $M + Na^+$ ) 480.1240, found 480.1242.

**3b-(3,4-dimethylphenyl)-2-tosyl-2,3,4,4a-tetrahydrobenzo[e]cyclopropa[g]isoindol-1(3bH)-one (2n)**

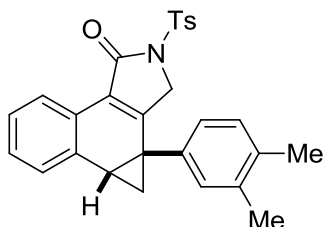

**2n**

Compound **2n** was prepared in 65% yield (59.2 mg) according to the general procedure. Pale yellow oil.  $^1H$  NMR (400 MHz,  $CDCl_3$ )  $\delta$  8.48 (dd,  $J = 7.2, 1.6$  Hz, 1H), 7.95 (d,  $J = 8.4$  Hz, 2H), 7.41 (dd,  $J = 7.2, 1.6$  Hz, 1H), 7.35 – 7.21 (m, 4H), 7.16 – 7.01 (m, 3H), 4.47 (d,  $J = 19.2$  Hz, 1H), 4.13 (d,  $J = 19.2$  Hz, 1H), 2.80 (dd,  $J = 9.6, 5.6$  Hz, 1H), 2.41 (s, 3H), 2.33 – 2.21 (m, 7H), 0.38 (dd,  $J = 5.6, 4.0$  Hz, 1H);  $^{13}C$  NMR (100 MHz,  $CDCl_3$ )  $\delta$  167.1, 157.1, 144.9, 137.3, 137.1, 136.7, 135.7, 135.1, 130.8, 130.2, 129.7, 128.5, 128.1, 127.6, 126.8, 126.4, 124.4, 124.3, 121.7, 50.8, 31.8, 31.7, 21.6, 19.7, 19.4, 16.9; IR (neat): 2922, 1719, 1597, 1493, 1452, 1363, 1170, 1091, 675, 582, 544; HRESIMS Calcd for  $[C_{28}H_{25}NNaO_3S]^+$  ( $M + Na^+$ ) 478.1447, found 478.1448.

**3b-(naphthalen-1-yl)-2-tosyl-2,3,4,4a-tetrahydrobenzo[e]cyclopropa[g]isoindol-1(3bH)-one (2o)**

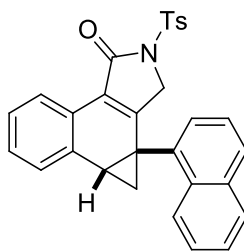

**2o**

Compound **2o** was prepared in 70% yield (66.8 mg), d.r. = 6.2:1 according to the general procedure. Pale yellow oil.  $^1\text{H}$  NMR (400 MHz,  $\text{CDCl}_3$ )  $\delta$  8.61 – 8.53 (m, 1H), 7.93 – 7.81 (m, 4H), 7.64 (dd,  $J = 7.2, 0.8$  Hz, 1H), 7.54 – 7.41 (m, 3H), 7.41 – 7.23 (m, 6H), 4.41 (d,  $J = 19.2$  Hz, 1H), 3.75 (d,  $J = 19.2$  Hz, 1H), 2.82 (dd,  $J = 9.2, 5.6$  Hz, 1H), 2.48 (dd,  $J = 9.2, 4.4$  Hz, 1H), 2.40 (s, 3H), 0.59 (dd,  $J = 5.6, 4.4$  Hz, 1H);  $^{13}\text{C}$  NMR (100 MHz,  $\text{CDCl}_3$ )  $\delta$  167.1, 157.5, 144.9, 135.5, 135.4, 134.7, 134.0, 132.6, 129.6, 129.3, 128.9, 128.8, 128.1, 128.0, 127.3, 127.2, 126.8, 126.2, 125.3, 124.6, 124.4, 123.6, 121.8, 50.7, 32.2, 30.0, 21.6, 17.1; IR (neat): 3060, 2924, 2854, 1720, 1596, 1363, 1170, 1091, 676, 582, 544; HRESIMS Calcd for  $[\text{C}_{30}\text{H}_{23}\text{NNaO}_3\text{S}]^+$  ( $\text{M} + \text{Na}^+$ ) 500.1291, found 500.1294.

**3b-(thiophen-2-yl)-2-tosyl-2,3,4,4a-tetrahydrobenzo[e]cyclopropa[g]isoindol-1(3bH)-one (2p)**

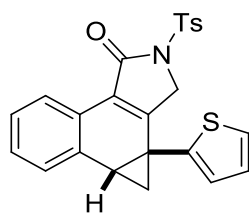

**2p**

Compound **2p** was prepared in 65% yield (56.3 mg) according to the general procedure. Pale yellow oil.  $^1\text{H}$  NMR (400 MHz,  $\text{CDCl}_3$ )  $\delta$  8.54 – 8.46 (m, 1H), 7.97 (d,  $J = 8.4$  Hz, 2H), 7.41 (dd,  $J = 7.6, 1.6$  Hz, 1H), 7.37 – 7.24 (m, 5H), 7.03 – 6.97 (m, 2H), 4.57 (d,  $J = 19.2$  Hz, 1H), 4.35 (d,  $J = 19.2$  Hz, 1H), 2.95 (dd,  $J = 9.2, 5.6$  Hz, 1H), 2.42 (s, 3H), 2.36 (dd,  $J = 9.2, 4.0$  Hz, 1H), 0.51 (dd,  $J = 5.6, 4.0$  Hz, 1H);  $^{13}\text{C}$  NMR (100 MHz,  $\text{CDCl}_3$ )  $\delta$  166.8, 155.3, 145.0, 143.2, 135.6, 134.4, 129.7, 128.7, 128.1, 127.7, 127.5, 127.2, 126.7, 126.0, 124.6, 124.1, 122.1, 50.6, 33.6, 26.0, 21.6, 19.1; IR (neat): 2923, 2852, 1719, 1493, 1362, 1169, 1118, 1091, 674, 580, 545; HRESIMS Calcd for  $[\text{C}_{24}\text{H}_{19}\text{NNaO}_3\text{S}_2]^+$  ( $\text{M} + \text{Na}^+$ ) 456.0699, found 456.0700.

**7-methyl-3b-phenyl-2-tosyl-2,3,4,4a-tetrahydrobenzo[e]cyclopropa[g]isoindol-1(3bH)-one (2r)**

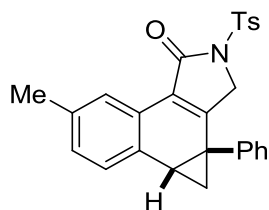

**2r**

Compound **2r** was prepared in 76% yield (67.0 mg) according to the general procedure. Pale yellow oil.  $^1\text{H}$  NMR (400 MHz,  $\text{CDCl}_3$ )  $\delta$  8.33 (s, 1H), 7.95 (d,  $J = 8.0$  Hz, 2H), 7.42 – 7.27 (m, 8H), 7.12 (d,  $J = 7.2$  Hz, 1H), 4.47 (d,  $J = 19.2$  Hz, 1H), 4.11 (d,  $J = 19.2$  Hz, 1H), 2.82 (dd,  $J = 9.2, 6.0$  Hz, 1H), 2.41 (s, 3H), 2.34 (s, 3H), 2.25 (dd,  $J = 9.2, 4.0$  Hz, 1H), 0.45 – 0.33 (m, 1H);  $^{13}\text{C}$  NMR (100 MHz,  $\text{CDCl}_3$ )  $\delta$  167.1, 156.7, 144.9, 139.7, 136.3, 135.7, 132.0, 129.7, 129.6, 129.4, 129.0, 128.2, 128.1, 127.5, 124.9, 124.1, 122.0, 50.8, 31.7, 31.5, 21.6, 21.2, 17.1; IR (neat): 3056, 2922, 1718, 1498, 1363, 1170, 1093, 814, 660, 593, 544; HRESIMS Calcd for  $[\text{C}_{27}\text{H}_{23}\text{NNaO}_3\text{S}]^+$  ( $\text{M} + \text{Na}^+$ ) 464.1291, found 464.1294.

**7-methoxy-3b-phenyl-2-tosyl-2,3,4,4a-tetrahydrobenzo[e]cyclopropa[g]isoindol-1-one (3bH)-one (2s)**

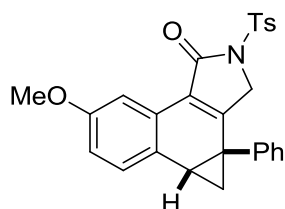

**2s**

Compound **2s** was prepared in 76% yield (69.5 mg) according to the general procedure. Pale yellow oil.  $^1\text{H}$  NMR (500 MHz,  $\text{CDCl}_3$ )  $\delta$  8.11 (d,  $J = 2.5$  Hz, 1H), 7.95 (d,  $J = 8.0$  Hz, 2H), 7.40 – 7.29 (m, 8H), 6.89 (dd,  $J = 8.0, 2.5$  Hz, 1H), 4.46 (d,  $J = 19.2$  Hz, 1H), 4.11 (d,  $J = 19.2$  Hz, 1H), 3.83 (s, 3H), 2.82 (dd,  $J = 9.5, 5.5$  Hz, 1H), 2.42 (s, 3H), 2.24 (dd,  $J = 9.5, 4.5$  Hz, 1H), 0.39 (dd,  $J = 5.5, 4.5$  Hz, 1H);  $^{13}\text{C}$  NMR (125 MHz,  $\text{CDCl}_3$ )  $\delta$  167.1, 158.4, 157.3, 145.0, 139.6, 135.6, 129.7, 129.6, 129.0, 128.5, 128.2, 128.0, 127.2, 125.2, 121.9, 116.0, 108.3, 55.5, 50.8, 31.6, 31.3, 21.6,

17.0; IR (neat): 2926, 1716, 1601, 1497, 1361, 1169, 1093, 1033, 662, 590, 545; HRESIMS Calcd for  $[C_{27}H_{23}NNaO_4S]^+$  ( $M + Na^+$ ) 480.1240, found 480.1240.

**7-fluoro-3b-phenyl-2-tosyl-2,3,4,4a-tetrahydrobenzo[e]cyclopropa[g]isoindol-1(3bH)-one (2t)**

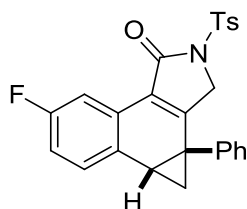

**2t**

Compound **2t** was prepared in 64% yield (56.9 mg) according to the general procedure. Pale yellow solid. (mp 202-203 °C).  $^1H$  NMR (400 MHz,  $CDCl_3$ )  $\delta$  8.22 (dd,  $J = 10.0, 2.8$  Hz, 1H), 7.95 (d,  $J = 8.4$  Hz, 2H), 7.42 – 7.28 (m, 8H), 7.04 – 6.95 (m, 1H), 4.49 (d,  $J = 19.2$  Hz, 1H), 4.12 (d,  $J = 19.2$  Hz, 1H), 2.84 (dd,  $J = 9.6, 6.0$  Hz, 1H), 2.42 (s, 3H), 2.29 (dd,  $J = 9.6, 4.4$  Hz, 1H), 0.41 (dd,  $J = 6.0, 4.4$  Hz, 1H);  $^{13}C$  NMR (100 MHz,  $CDCl_3$ )  $\delta$  166.6, 161.5 (d,  $J = 242.0$  Hz), 157.8, 145.1, 139.3, 135.5, 130.6 (d,  $J = 3.0$  Hz), 129.7, 129.6, 129.1, 128.9 (d,  $J = 8.0$  Hz), 128.3, 128.1, 125.7 (d,  $J = 9.0$  Hz), 121.4 (d,  $J = 3.0$  Hz), 115.5 (d,  $J = 22.0$  Hz), 111.3 (d,  $J = 24.0$  Hz), 50.8, 31.9, 31.2, 21.6, 17.0;  $^{19}F$  NMR (376 MHz,  $CDCl_3$ )  $\delta$  -114.9; IR (neat): 3064, 2923, 1718, 1496, 1435, 1362, 1170, 1092, 660, 594, 544; HRESIMS Calcd for  $[C_{26}H_{20}FNNaO_3S]^+$  ( $M + Na^+$ ) 468.1040, found 468.1042.

**6,7-dimethyl-3b-phenyl-2-tosyl-2,3,4,4a-tetrahydrobenzo[e]cyclopropa[g]isoindol-1(3bH)-one (2u)**

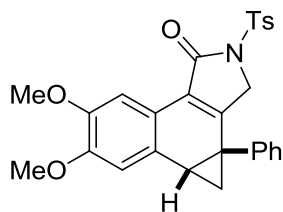

**2u**

Compound **2u** was prepared in 66% yield (60.0 mg) according to the general procedure. Pale yellow oil.  $^1\text{H}$  NMR (500 MHz,  $\text{CDCl}_3$ )  $\delta$  8.11 (s, 1H), 7.95 (d,  $J = 8.5$  Hz, 2H), 7.41 – 7.30 (m, 7H), 6.93 (s, 1H), 4.45 (d,  $J = 19.0$  Hz, 1H), 4.11 (d,  $J = 19.0$  Hz, 1H), 3.92 (s, 6H), 2.78 (dd,  $J = 9.5, 5.5$  Hz, 1H), 2.42 (s, 3H), 2.24 (dd,  $J = 9.5, 4.5$  Hz, 1H), 0.43 – 0.33 (m, 1H);  $^{13}\text{C}$  NMR (125 MHz,  $\text{CDCl}_3$ )  $\delta$  167.3, 154.2, 149.3, 147.6, 144.9, 139.8, 135.7, 129.8, 129.6, 129.0, 128.1(4), 128.1(2), 128.0, 121.9, 117.1, 110.4, 107.3, 56.0, 55.9, 50.7, 31.8, 31.5, 21.6, 16.2; IR (neat): 2922, 2851, 1716, 1516, 1362, 1270, 1168, 1144, 1093, 664, 585, 544; HRESIMS Calcd for  $[\text{C}_{28}\text{H}_{25}\text{NNaO}_5\text{S}]^+$  ( $\text{M} + \text{Na}^+$ ) 510.1346, found 510.1350.

#### 6-methyl-1-phenyl-4-tosyl-3,4-dihydrobenzo[*f*]quinolone (**2v'**)

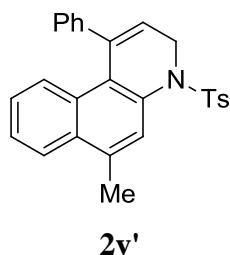

The product **2v'** was afforded as a pale yellow solid (81%, 68.9 mg; mp 194-195 °C).  $^1\text{H}$  NMR (400 MHz,  $\text{CDCl}_3$ )  $\delta$  8.01 – 7.90 (m, 2H), 7.42 – 7.30 (m, 3H), 7.21 – 7.04 (m, 4H), 7.04 – 6.96 (m, 1H), 6.83 (d,  $J = 8.0$  Hz, 2H), 6.70 – 6.43 (m, 2H), 5.72 (t,  $J = 5.6$  Hz, 1H), 4.46 (d,  $J = 5.6$  Hz, 2H), 2.77 (s, 3H), 2.08 (s, 3H);  $^{13}\text{C}$  NMR (100 MHz,  $\text{CDCl}_3$ )  $\delta$  143.2, 141.0, 138.6, 136.5, 135.8, 135.6, 132.0, 129.5, 129.1, 128.2, 127.8, 127.4, 127.1, 127.0, 125.7, 125.2(0), 125.1(7), 124.7, 124.3, 123.2, 45.5, 21.2, 19.9; IR (neat): 2924, 1597, 1351, 1164, 1089, 927, 738, 664, 580; HRESIMS Calcd for  $[\text{C}_{27}\text{H}_{23}\text{NNaO}_2\text{S}]^+$  ( $\text{M} + \text{Na}^+$ ) 448.1342, found 448.1340.

#### Synthesis of chiral $\gamma$ -lactams (+)-2.

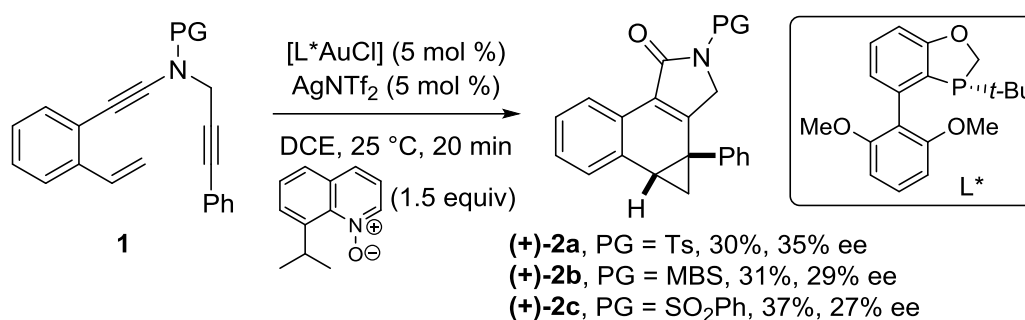

To a dry flask, the powdered L\*AuCl (0.01 mmol, 5.6 mg), AgNTf<sub>2</sub> (0.01 mmol, 3.9 mg) was added. Then DCE (1.5 mL) was injected into the flask and the mixture was stirred at 25 °C for about 10 min. Then 8-isopropylquinoline *N*-oxide (0.3 mmol, 56.1 mg) and the diyne **1** (0.2 mmol) was dissolved in DCE (1.5 mL), the solution was added to the previous mixture. The reaction was stirred at 25 °C for about 20 min and the progress of the reaction was monitored by TLC. Upon completed, the mixture was evaporated in vacuum. The residue was purified by flash chromatography on silica gel (eluent: PE/EtOAc and PE/DCM) to afford the desired chiral (+)-**2**.

#### chiral $\gamma$ -lactam (+)-**2a**

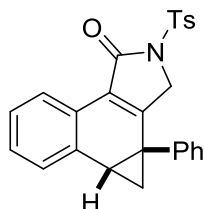

(+)-**2a**

Compound (+)-**2a** was prepared in 30% yield (26.0 mg) according to the above procedure. The product was isolated through silica gel column chromatography (PE:EA = 15:1 and PE:DCM = 2:1) as a pale yellow solid.  $[\alpha]_D^{25} = +29.3^\circ$  ( $c = 1.0$ , CHCl<sub>3</sub>). 35% ee (determined by HPLC (IC, *n*-hexane/2-propanol = 70/30, flow rate = 1.0 mL/min,  $\lambda = 254$  nm)  $t_R = 20.13$  min (minor), 22.05 min (major)).

#### chiral $\gamma$ -lactam (+)-**2b**

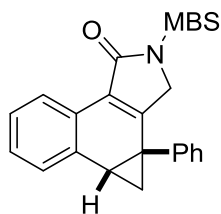

(+)-**2b**

Compound (+)-**2b** was prepared in 31% yield (27.5 mg) according to the above procedure. The product was isolated through silica gel column chromatography (PE:EA = 15:1 and PE:DCM = 2:1) as a pale yellow oil.  $[\alpha]_D^{25} = +16.0^\circ$  ( $c = 1.0$ ,  $\text{CHCl}_3$ ). 29% ee (determined by HPLC (IC, *n*-hexane/2-propanol = 70/30, flow rate = 1.0 mL/min,  $I = 254$  nm)  $t_R = 35.23$  min (minor), 40.56 min (major)).

#### chiral $\gamma$ -lactam (+)-**2c**

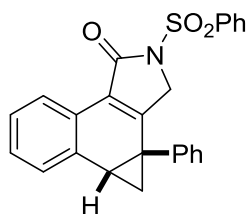

(+)-**2c**

Compound (+)-**2c** was prepared in 37% yield (30.5 mg) according to the above procedure. The product was isolated through silica gel column chromatography (PE:EA = 15:1 and PE:DCM = 2:1) as a pale yellow oil.  $[\alpha]_D^{25} = +16.3^\circ$  ( $c = 1.0$ ,  $\text{CHCl}_3$ ). 27% ee (determined by HPLC (IC, *n*-hexane/2-propanol = 80/20, flow rate = 1.0 mL/min,  $I = 254$  nm)  $t_R = 32.47$  min (minor), 34.74 min (major)).

#### 4-phenyl-2-tosyl-2,3,5,6-tetrahydrobenzo[3,4]cyclohepta[1,2-*c*]pyrrol-1(4*H*)-one

(**3a**)

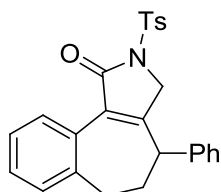

**3a**



Compound **3a** was prepared in 85% yield (54.2 mg) according to the known procedure (0.20 mmol scale). Pale yellow solid. (mp 196-197 °C). <sup>1</sup>H NMR (500 MHz, CDCl<sub>3</sub>) δ 8.08 (d, *J* = 7.0 Hz, 1H), 7.95 (d, *J* = 8.5 Hz, 2H), 7.33 – 7.19 (m, 7H), 7.15 – 7.07 (m, 3H), 4.24 – 4.12 (m, 2H), 3.97 – 3.89 (m, 1H), 2.86 – 2.69 (m, 2H), 2.53 – 2.42 (m, 1H), 2.40 (s, 3H), 2.08 – 1.93 (m, 1H); <sup>13</sup>C NMR (125 MHz, CDCl<sub>3</sub>) δ 168.3, 157.7, 145.0, 143.1, 141.9, 135.2, 129.7, 129.5, 129.2(0), 129.1(7), 128.7, 128.5(2), 128.5(0), 128.2, 127.7, 127.5, 126.2, 51.8, 49.8, 37.9, 33.2, 21.6; IR (neat): 3059, 2929, 1720, 1597, 1450, 1361, 1170, 1129, 669, 592, 543; HRESIMS Calcd for [C<sub>26</sub>H<sub>23</sub>NNaO<sub>3</sub>S]<sup>+</sup> (M + Na<sup>+</sup>) 452.1291, found 452.1293.

## Crystal data and structure refinement for 2a. CCDC Number = 2133059

ORTEP drawing of **2a** (thermal ellipsoids set at 50% probability). Recrystallization from *n*-hexane/DCM afforded single crystals suitable for X-ray diffraction analysis.

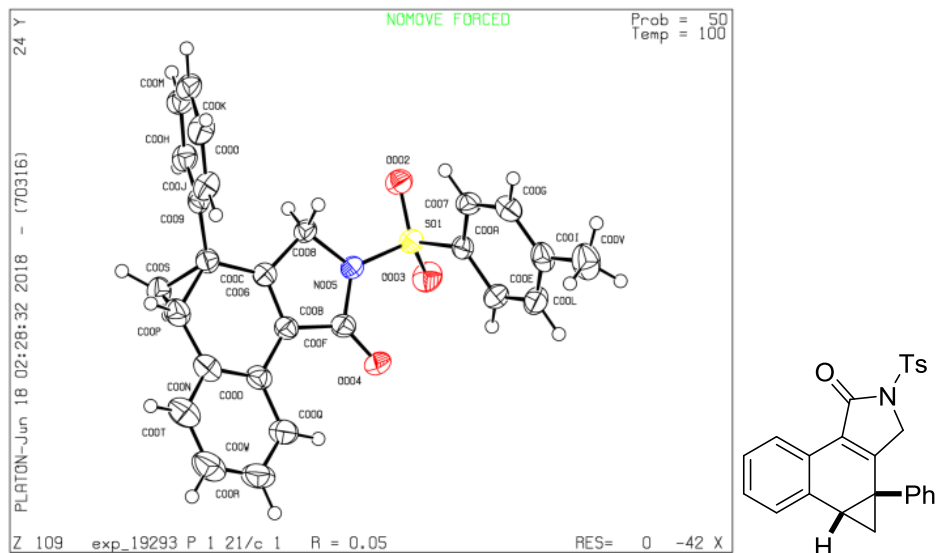

Bond precision: C-C = 0.0031 Å

Wavelength=0.71073

Cell: a=13.7021 (10) b=15.1512 (11) c=11.1435 (8)  
alpha=90 beta=93.894 (6) gamma=90  
Temperature: 100 K

|                        | Calculated                                                     | Reported                                           |
|------------------------|----------------------------------------------------------------|----------------------------------------------------|
| Volume                 | 2308.1 (3)                                                     | 2308.1 (3)                                         |
| Space group            | P 21/c                                                         | P 1 21/c 1                                         |
| Hall group             | -P 2ybc                                                        | -P 2ybc                                            |
| Moiety formula         | C <sub>26</sub> H <sub>21</sub> N O <sub>3</sub> S [+ solvent] | C <sub>26</sub> H <sub>21</sub> N O <sub>3</sub> S |
| Sum formula            | C <sub>26</sub> H <sub>21</sub> N O <sub>3</sub> S [+ solvent] | C <sub>26</sub> H <sub>21</sub> N O <sub>3</sub> S |
| Mr                     | 427.50                                                         | 427.50                                             |
| Dx, g cm <sup>-3</sup> | 1.230                                                          | 1.230                                              |
| Z                      | 4                                                              | 4                                                  |
| Mu (mm <sup>-1</sup> ) | 0.167                                                          | 0.167                                              |
| F <sub>000</sub>       | 896.0                                                          | 896.0                                              |
| F <sub>000</sub> '     | 896.88                                                         |                                                    |
| h, k, lmax             | 19, 21, 15                                                     | 17, 21, 15                                         |
| Nref                   | 6730                                                           | 5784                                               |
| Tmin, Tmax             | 0.943, 0.967                                                   | 0.763, 1.000                                       |
| Tmin'                  | 0.943                                                          |                                                    |

Correction method= # Reported T Limits: Tmin=0.763 Tmax=1.000  
AbsCorr = MULTI-SCAN

Data completeness= 0.859

Theta (max)= 29.983

R(reflections)= 0.0548 ( 4265)

wR2(reflections)= 0.1413 ( 5784)

S = 0.998

Npar= 281

## Computational Details

All calculations were carried out with the Gaussian 09 programs.<sup>4</sup> The geometries of all the species were fully optimized by using density functional theory (DFT) of the M06 method.<sup>5</sup> The 6-31G(d,p)<sup>6</sup> basis set was used for all atoms except for gold which were described by the Stuttgart/Dresden small-core RECP (relativistic effective core potential) plus valence double- $\zeta$  basis set (SDD).<sup>7</sup> Frequency calculations at the same level were performed to confirm each stationary point to be either a local minimum or a transition state (TS). The transition states were verified by intrinsic reaction coordinate (IRC) calculations.<sup>8</sup> The intermediates were characterized by all real frequencies. The solvent effect of chloroform ( $\epsilon = 4.7113$ ) was studied by performing the self-consistent reaction field (SCRF) of the SMD method of Truhlar and Cramer<sup>9</sup> at the same computational level.

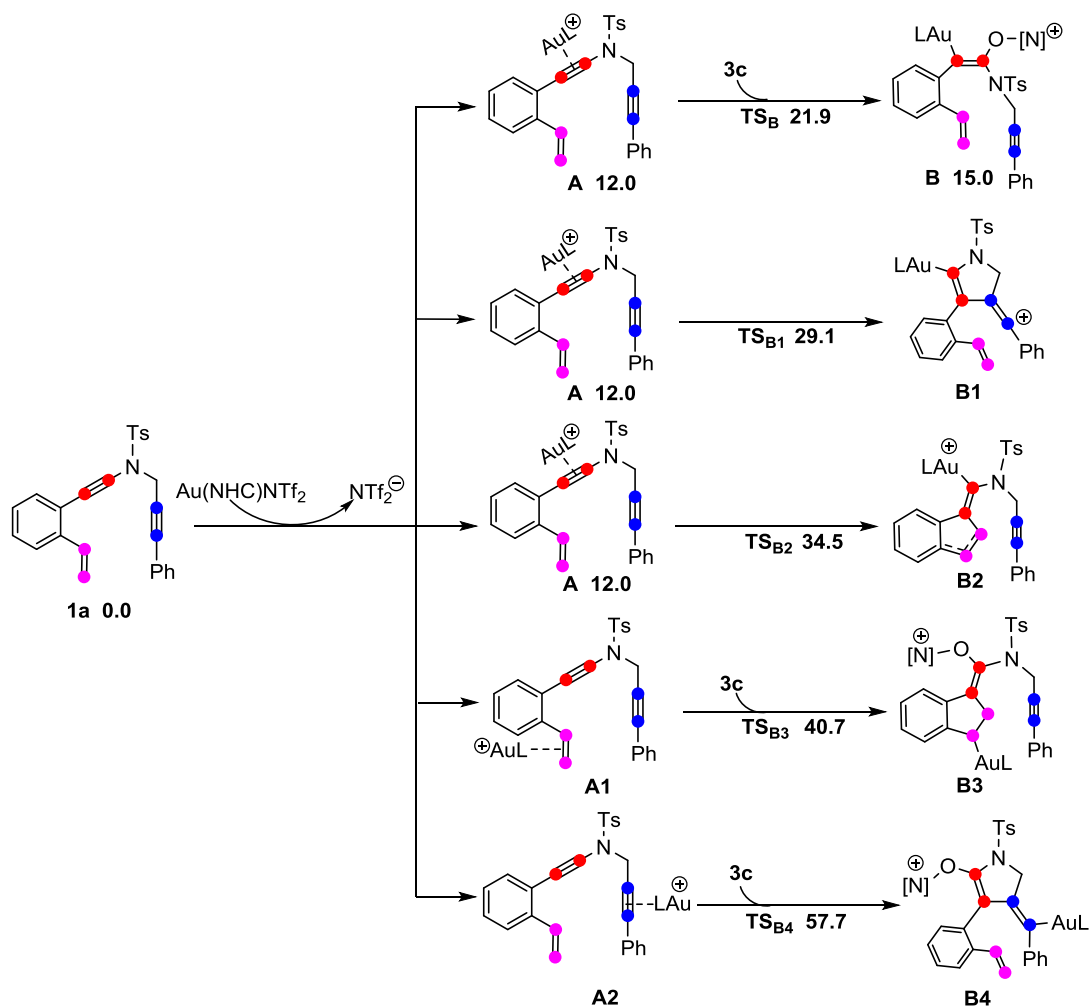

**Scheme S1.** The possible coordination of Au catalyst with substrate **1a** and energies for the formation of metal carbene-like intermediates. Our calculations demonstrate that the catalytic Au<sup>I</sup> species preferentially bound to the electron-rich amide-tethered C-C triple bond of the substrate **1a** to form the precursor **A** and subsequent nucleophilic attack of *N*-oxide **3c** on the gold-ligated ynamide **A** via **TS<sub>B</sub>** to give a vinyl metal intermediate **B** is the most favored pathway.

#### Reference:

1. B. M. Trost and R. C. Livingston, An Atom-economic and Selective Ruthenium-Catalyzed Redox Isomerization of Propargylic Alcohols. An Efficient Strategy for the Synthesis of Leukotrienes, *J. Am. Chem. Soc.*, 2008, **130**, 11970–11978.
2. E. K. Aratikatla, T. R. Valkute, S. K. Puri, K. Srivastava and A. K. Bhattacharya, Norepinephrine Alkaloids as Antiplasmodial Agents: Synthesis of Syncarpamide and Insight into the Structure-Activity Relationships of Its Analogues as Antiplasmodial Agents, *Eur. J. Med. Chem.*, 2017, **138**, 1089–1105.
3. F.-L. Hong, Z.-S. Wang, D.-D. Wei, T.-Y. Zhai, G.-C. Deng, X. Lu, R.-S. Liu and L.-W. Ye, Generation of Donor/Donor Copper Carbenes through Copper-Catalyzed Diyne Cyclization: Enantioselective and Divergent Synthesis of Chiral Polycyclic Pyrroles, *J. Am. Chem. Soc.*, 2019, **141**, 16961–16970.
4. Gaussian 09, Revision E.01, M. J. Frisch, G. W. Trucks, H. B. Schlegel, G. E. Scuseria, M. A. Robb, J. R. Cheeseman, G. Scalmani, V. Barone, B. Mennucci, G. A. Petersson, H. Nakatsuji, M. Caricato, X. Li, H. P. Hratchian, A. F. Izmaylov, J. Bloino, G. Zheng, J. L. Sonnenberg, M. Hada, M. Ehara, K. Toyota, R. Fukuda, J. Hasegawa, M. Ishida, T. Nakajima, Y. Honda, O. Kitao, H. Nakai, T. Vreven, J. A. Montgomery, Jr., J. E. Peralta, F. Ogliaro, M. Bearpark, J. J. Heyd, E. Brothers, K. N. Kudin, V. N. Staroverov, R. Kobayashi, J. Normand, K. Raghavachari, A. Rendell, J. C. Burant, S. S. Iyengar, J. Tomasi, M. Cossi, N. Rega, J. M. Millam, M. Klene, J. E. Knox, J. B. Cross, V. Bakken, C. Adamo, J. Jaramillo, R. Gomperts, R. E. Stratmann, O. Yazyev, A. J. Austin, R. Cammi, C. Pomelli, J. W. Ochterski, R. L. Martin, K.

Morokuma, V. G. Zakrzewski, G. A. Voth, P. Salvador, J. J. Dannenberg, S. Dapprich, A. D. Daniels, O. Farkas, J. B. Foresman, J. V. Ortiz, J. Cioslowski, and D. J. Fox, *Gaussian, Inc., Wallingford CT*, 2009.

5. Y. Zhao and D. G. Truhlar, The M06 Suite of Density Functionals for Main Group Thermochemistry, Thermochemical Kinetics, Noncovalent Interactions, Excited States, and Transition Elements: Two New Functionals and Systematic Testing of Four M06-Class Functionals and 12 Other Functionals, *Theor. Chem. Acc.*, 2008, **120**, 215–241.

6. a) R. Ditchfield, W. J. Hehre and J. A. Pople, Self-Consistent Molecular-Orbital Methods. IX. An Extended Gaussian-Type Basis for Molecular-Orbital Studies of Organic Molecules, *J. Chem. Phys.*, 1971, **54**, 724–728; b) W. J. Hehre, R. Ditchfield and J. A. Pople, Self-Consistent Molecular Orbital Methods. XII. Further Extensions of Gaussian-Type Basis Sets for Use in Molecular Orbital Studies of Organic Molecules, *J. Chem. Phys.*, 1972, **56**, 2257–2261; c) P. C. Hariharan and J. A. Pople, The Influence of Polarization Functions on Molecular Orbital Hydrogenation Energies, *Theo. Chim. Acta.*, 1973, **28**, 213–222; d) P. C. Hariharan and J. A. Pople, Accuracy of  $AH_n$  Equilibrium Geometries by Single Determinant Molecular Orbital Theory, *Mol. Phys.*, 1974, **27**, 209–214; e) M. S. Gordon, The Isomers of Silacyclopropane, *Chem. Phys. Lett.*, 1980, **76**, 163–168.

7. P. Fuentealba, H. Preuss, H. Stoll and L. von Szentpaly, A Proper Account of Core-Polarization with Pseudopotentials: Single Valence-Electron Alkali Compounds, *Chem. Phys. Lett.*, 1989, **89**, 418–422.

8. C. Gonzalez and H. B. Schlegel, Reaction Path Following in Mass-Weighted Internal Coordinates, *J. Phys. Chem.*, 1990, **94**, 5523–5527.

9. A. V. Marenich, C. J. Cramer and D. G. Truhlar, Universal Solvation Model Based on Solute Electron Density and on a Continuum Model of the Solvent Defined by the Bulk Dielectric Constant and Atomic Surface Tensions, *J. Phys. Chem. B.*, 2009, **113**, 6378–6396.

## Cartesian Coordinates and Thermochemical Data (Energies in Hartree)

**1a**

Number of imaginary frequencies: 0

|   |             |             |             |
|---|-------------|-------------|-------------|
| C | -1.04455200 | -4.86063700 | -0.06491800 |
| C | -0.83209100 | -3.54183800 | -0.43663000 |
| C | -0.42014900 | -2.59198500 | 0.50986400  |
| C | -0.21171300 | -2.97763600 | 1.85605200  |
| C | -0.44104100 | -4.31338500 | 2.20222300  |
| C | -0.84830100 | -5.24768400 | 1.25974000  |
| H | -1.37195000 | -5.58565400 | -0.80633900 |
| H | -0.98249700 | -3.22641200 | -1.46683300 |
| H | -0.31914800 | -4.61544500 | 3.24088600  |
| H | -1.02589400 | -6.27768100 | 1.56041100  |
| C | -0.19228700 | -1.24597400 | 0.10655100  |
| C | 0.00950500  | -0.09036700 | -0.20601200 |
| N | 0.23302200  | 1.19283200  | -0.54628900 |
| C | 0.48677300  | 1.47705300  | -1.98061800 |
| C | 1.65706600  | 0.76990200  | -2.48382400 |
| C | 2.65119900  | 0.13713300  | -2.76767700 |
| C | 3.83599700  | -0.60598900 | -3.05084200 |
| C | 4.93918600  | 0.00594800  | -3.66398200 |
| C | 3.91811400  | -1.95355500 | -2.66940800 |
| C | 6.09672700  | -0.72441900 | -3.90233400 |
| H | 4.87449600  | 1.05381700  | -3.95020200 |
| C | 5.08116700  | -2.67472400 | -2.90709300 |
| H | 3.06383600  | -2.41845600 | -2.18102100 |
| C | 6.17016200  | -2.06416900 | -3.52646000 |
| H | 6.94684000  | -0.24515300 | -4.38271200 |
| H | 5.13724900  | -3.71947600 | -2.61023600 |
| H | 7.07777400  | -2.63279800 | -3.71614700 |

|   |             |             |             |
|---|-------------|-------------|-------------|
| S | 1.09940400  | 2.13138700  | 0.61928900  |
| O | 0.57252600  | 1.70750700  | 1.90507200  |
| O | 0.97504000  | 3.50449600  | 0.15615100  |
| C | 2.77378300  | 1.60883800  | 0.45837500  |
| C | 3.16072200  | 0.39260200  | 1.02390800  |
| C | 3.64093700  | 2.35467000  | -0.33431000 |
| C | 4.44036500  | -0.07742900 | 0.77389300  |
| H | 2.47171200  | -0.17253400 | 1.64791100  |
| C | 4.92003900  | 1.86696300  | -0.56525900 |
| H | 3.31436700  | 3.29882700  | -0.76360000 |
| C | 5.33170400  | 0.64357100  | -0.03107100 |
| H | 4.75798100  | -1.02769500 | 1.20058600  |
| H | 5.61130300  | 2.44059500  | -1.18074800 |
| C | 6.68754800  | 0.08860600  | -0.33016500 |
| H | 7.30246200  | 0.80059400  | -0.89023800 |
| H | 7.22139100  | -0.18094900 | 0.58900300  |
| H | 6.60101200  | -0.82560700 | -0.93315800 |
| H | -0.42210200 | 1.18653500  | -2.52127100 |
| H | 0.58565000  | 2.56324900  | -2.08728200 |
| C | 0.21832100  | -1.98138600 | 2.84281600  |
| C | 0.85923100  | -2.24125300 | 3.98585500  |
| H | 0.00053100  | -0.94057000 | 2.59129900  |
| H | 1.12951100  | -1.43866800 | 4.66758000  |
| H | 1.14622400  | -3.24967700 | 4.28196600  |

Electronic Energy (0K) = -1605.723755

Electronic Energy (0K) + ZPE = -1605.325306

Enthalpy (298K) = -1605.297580

Free Energy (298K) = -1605.384319

**Au(NHC)NTf<sub>2</sub>**

Number of imaginary frequencies: 0

|    |             |             |             |
|----|-------------|-------------|-------------|
| C  | -1.50232000 | -2.21032400 | 0.87790100  |
| F  | -0.21952200 | -2.49716800 | 1.04400700  |
| F  | -1.88544100 | -1.36613900 | 1.81970400  |
| F  | -2.20898600 | -3.32264400 | 0.96391700  |
| S  | -1.80932700 | -1.48868900 | -0.80584500 |
| O  | -3.25079900 | -1.47512600 | -0.95705900 |
| O  | -0.96874500 | -2.27336400 | -1.69476300 |
| N  | -1.15929000 | 0.01543400  | -0.62811000 |
| O  | -3.15607800 | 1.32272800  | -1.64189300 |
| O  | -1.01506500 | 2.47775900  | -0.95810900 |
| S  | -1.99909100 | 1.42278400  | -0.77601300 |
| C  | -2.65167000 | 1.69408600  | 0.92962200  |
| F  | -3.54213600 | 0.76691600  | 1.22928700  |
| F  | -1.65178400 | 1.64844400  | 1.79802400  |
| F  | -3.21795500 | 2.88692900  | 0.97360600  |
| Au | 0.94169900  | 0.13888700  | -0.25907300 |
| C  | 5.06123200  | -0.48406200 | 0.34527800  |
| C  | 5.03692700  | 0.86658400  | 0.44999700  |
| H  | 5.87516700  | -1.19188000 | 0.41505700  |
| H  | 5.82574600  | 1.58497700  | 0.62248300  |
| C  | 3.27412700  | 2.63785300  | 0.29126000  |
| H  | 2.19673000  | 2.65845200  | 0.10803800  |
| H  | 3.48553100  | 3.08682200  | 1.26580700  |
| H  | 3.78432600  | 3.20549800  | -0.49193500 |
| C  | 3.34768600  | -2.27412400 | -0.04577400 |
| H  | 3.19414700  | -2.73491800 | 0.93501700  |
| H  | 2.41382500  | -2.30650500 | -0.61427300 |
| H  | 4.11902100  | -2.82428800 | -0.59010900 |
| N  | 3.72345100  | 1.25560800  | 0.27237400  |



|   |            |             |            |
|---|------------|-------------|------------|
| N | 3.76311800 | -0.88780100 | 0.10259900 |
| C | 2.93616500 | 0.17974600  | 0.06106400 |

Electronic Energy (0K) = -2267.1796324

Electronic Energy (0K) + ZPE = -2266.992654

Enthalpy (298K) = -2266.968023

Free Energy (298K) = -2267.047666

### **NTf<sub>2</sub><sup>-</sup>**

Number of imaginary frequencies: 0

|   |             |             |             |
|---|-------------|-------------|-------------|
| C | -2.08301900 | 0.74971500  | 0.18406100  |
| F | -2.38116700 | 0.83708100  | 1.47145700  |
| F | -1.26505900 | 1.74303700  | -0.13850800 |
| F | -3.20050100 | 0.86749200  | -0.52440600 |
| S | -1.30847000 | -0.87478200 | -0.20139700 |
| O | -1.05011900 | -0.82819100 | -1.63624700 |
| O | -2.26844100 | -1.84805500 | 0.30746200  |
| N | -0.03037300 | -0.79525000 | 0.76714400  |
| O | 1.74227400  | -1.60981900 | -0.93979500 |
| O | 2.32547400  | -1.10171300 | 1.45296400  |
| S | 1.49295500  | -0.85526300 | 0.28262600  |
| C | 1.89265500  | 0.88663800  | -0.16683100 |
| F | 1.23023700  | 1.24958500  | -1.25486800 |
| F | 1.57730800  | 1.70916000  | 0.82421700  |
| F | 3.19579700  | 0.98604200  | -0.40546100 |

Electronic Energy (0K) = -1826.852068

Electronic Energy (0K) + ZPE = -1826.795769

Enthalpy (298K) = -1826.781250

Free Energy (298K) = -1826.836518

### **A**

Number of imaginary frequencies: 0

|   |             |             |             |
|---|-------------|-------------|-------------|
| C | 0.67018200  | -2.32399200 | -2.72036800 |
| C | 0.46097100  | -1.75739400 | -1.47241600 |
| C | 1.45998400  | -0.99739900 | -0.84884000 |
| C | 2.69738800  | -0.78669900 | -1.50591900 |
| C | 2.88168000  | -1.36305200 | -2.76611100 |
| C | 1.88899800  | -2.12828500 | -3.36502000 |
| H | -0.11480700 | -2.90967800 | -3.19157900 |
| H | -0.48458800 | -1.90407200 | -0.95150400 |
| H | 3.81865900  | -1.18145200 | -3.28903800 |
| H | 2.06144000  | -2.56090000 | -4.34781600 |
| C | 1.23002800  | -0.46256200 | 0.48077400  |
| C | 1.87130400  | 0.11732200  | 1.40858600  |
| N | 2.41998200  | 0.74856500  | 2.39743500  |
| C | 2.82321500  | 0.04698200  | 3.64528600  |
| C | 1.67456300  | -0.29140600 | 4.47117400  |
| C | 0.70940500  | -0.55182500 | 5.15835600  |
| C | -0.41179300 | -0.85928800 | 5.98790800  |
| C | -1.64690900 | -0.22574300 | 5.78073200  |
| C | -0.28793000 | -1.80754300 | 7.01523400  |
| C | -2.73372600 | -0.53710200 | 6.58886200  |
| H | -1.74233800 | 0.50848400  | 4.98106300  |
| C | -1.38109600 | -2.11453000 | 7.81469100  |
| H | 0.67051100  | -2.29614300 | 7.17619400  |
| C | -2.60523700 | -1.48249700 | 7.60371900  |
| H | -3.68733000 | -0.03899900 | 6.42504400  |
| H | -1.27677800 | -2.85013700 | 8.60868300  |
| H | -3.45775900 | -1.72462600 | 8.23396700  |
| S | 2.33387400  | 2.53136300  | 2.40827100  |
| O | 3.43308200  | 2.92479700  | 3.26908900  |

|    |             |             |            |
|----|-------------|-------------|------------|
| O  | 2.27135500  | 2.88136900  | 1.00267300 |
| C  | 0.79627700  | 2.84898000  | 3.18945300 |
| C  | 0.75911500  | 2.96077500  | 4.57799000 |
| C  | -0.36019300 | 2.88917100  | 2.40942100 |
| C  | -0.47358700 | 3.11269200  | 5.19565000 |
| H  | 1.67664300  | 2.93056500  | 5.16091500 |
| C  | -1.57856900 | 3.05030400  | 3.05174600 |
| H  | -0.29965100 | 2.82102100  | 1.32541000 |
| C  | -1.65418600 | 3.14982200  | 4.44647300 |
| H  | -0.52653900 | 3.19286400  | 6.27970800 |
| H  | -2.49345700 | 3.10314000  | 2.46329000 |
| C  | -2.98615200 | 3.27971700  | 5.11280800 |
| H  | -2.91796400 | 3.10688000  | 6.19167300 |
| H  | -3.70575800 | 2.56549200  | 4.69061100 |
| H  | -3.40644000 | 4.28211000  | 4.96137300 |
| H  | 3.52697000  | 0.70261100  | 4.17153400 |
| H  | 3.38159500  | -0.84512300 | 3.34003400 |
| Au | -0.63951300 | -0.67920500 | 1.54615000 |
| C  | -2.47371600 | -1.02758500 | 2.40968700 |
| C  | -4.11251800 | -1.90964800 | 3.66796600 |
| C  | -4.62698800 | -0.83165300 | 3.02748700 |
| H  | -4.55326800 | -2.60338400 | 4.37067400 |
| H  | -5.61778500 | -0.39923400 | 3.03667600 |
| N  | -2.79412900 | -2.01417900 | 3.27572500 |
| N  | -3.60768400 | -0.30576800 | 2.25824000 |
| C  | -1.90100200 | -3.06286000 | 3.73926000 |
| H  | -0.90889400 | -2.89554700 | 3.31145400 |
| H  | -1.83413800 | -3.04014900 | 4.83172500 |
| H  | -2.27566400 | -4.03787500 | 3.41430500 |
| C  | -3.78774800 | 0.79911800  | 1.33166600 |

|   |             |             |             |
|---|-------------|-------------|-------------|
| H | -2.81100100 | 1.09358000  | 0.93675400  |
| H | -4.42976300 | 0.49010100  | 0.50119400  |
| H | -4.25087900 | 1.64573000  | 1.84761500  |
| C | 3.75358800  | 0.03469500  | -0.90528200 |
| C | 5.05856800  | -0.22637100 | -1.00642900 |
| H | 3.43205600  | 0.92512400  | -0.35959500 |
| H | 5.80113000  | 0.43513000  | -0.56745800 |
| H | 5.42984900  | -1.11222600 | -1.52050000 |

Electronic Energy (0K) = -2046.0350526

Electronic Energy (0K) + ZPE = -2045.505919

Enthalpy (298K) = -2045.468392

Free Energy (298K) = -2045.576284

### 3c

Number of imaginary frequencies: 0

|    |             |             |             |
|----|-------------|-------------|-------------|
| O  | -0.00075000 | 2.99895100  | 0.00002300  |
| C  | 1.18003700  | 1.04384900  | -0.00007500 |
| C  | -1.18036700 | 1.04330600  | 0.00002800  |
| C  | 1.17706100  | -0.33669300 | 0.00001300  |
| C  | -1.17674600 | -0.33695600 | -0.00003900 |
| H  | -2.07243600 | 1.65831100  | 0.00032500  |
| C  | 0.00021100  | -1.07435900 | 0.00000300  |
| H  | 0.00025900  | -2.15905400 | 0.00001300  |
| N  | -0.00047200 | 1.73473400  | -0.00000300 |
| H  | 2.07171200  | 1.65944900  | -0.00031000 |
| Cl | -2.70847000 | -1.15705700 | -0.00001200 |
| Cl | 2.70897600  | -1.15637400 | 0.00002500  |

Electronic Energy (0K) = -1242.358683

Electronic Energy (0K) + ZPE = -1242.285077

Enthalpy (298K) = -1242.276717

Free Energy (298K) = -1242.318163

**TS<sub>B</sub>**

Number of imaginary frequencies: 1

|   |             |             |             |
|---|-------------|-------------|-------------|
| C | 2.40793500  | -3.77202700 | -1.30151900 |
| C | 2.18725400  | -3.02838500 | -0.14971600 |
| C | 1.91433500  | -1.65814700 | -0.22862400 |
| C | 1.84096500  | -1.01999200 | -1.48359900 |
| C | 2.07945500  | -1.79143900 | -2.62969600 |
| C | 2.35680000  | -3.14764700 | -2.54758300 |
| H | 2.62911700  | -4.83437400 | -1.22805400 |
| H | 2.23364400  | -3.49959200 | 0.83130500  |
| H | 2.05648900  | -1.30893200 | -3.60565100 |
| H | 2.53946600  | -3.71912300 | -3.45462300 |
| C | 1.67074900  | -0.91657800 | 1.01839700  |
| C | 2.53063900  | -0.41804500 | 1.85181700  |
| N | 2.74865700  | 0.17274100  | 3.01199700  |
| C | 2.82159400  | -0.59384500 | 4.27375700  |
| C | 1.51569100  | -0.75935900 | 4.89715900  |
| C | 0.43440800  | -0.85939200 | 5.43758800  |
| C | -0.82739100 | -0.98309800 | 6.09400500  |
| C | -1.92693200 | -0.21808700 | 5.67550800  |
| C | -0.97896700 | -1.87884200 | 7.16362000  |
| C | -3.15233500 | -0.34997100 | 6.31759700  |
| H | -1.80444300 | 0.47418600  | 4.84256700  |
| C | -2.20778900 | -2.00444800 | 7.79797500  |
| H | -0.12563600 | -2.47094700 | 7.48680600  |
| C | -3.29636200 | -1.24260000 | 7.37761200  |
| H | -4.00122700 | 0.24539100  | 5.98705800  |
| H | -2.31685900 | -2.70063600 | 8.62614600  |

|    |             |             |            |
|----|-------------|-------------|------------|
| H  | -4.25648600 | -1.34337500 | 7.87837500 |
| S  | 2.91724100  | 1.89746600  | 3.06049400 |
| O  | 3.91412600  | 2.16484800  | 4.08225300 |
| O  | 3.10755300  | 2.29519100  | 1.67411900 |
| C  | 1.34050900  | 2.44659600  | 3.61383500 |
| C  | 1.11183900  | 2.58931100  | 4.97997100 |
| C  | 0.33012700  | 2.64778100  | 2.67331700 |
| C  | -0.16337600 | 2.93258300  | 5.40885900 |
| H  | 1.91626500  | 2.43151500  | 5.69467300 |
| C  | -0.93084700 | 3.00469900  | 3.12562400 |
| H  | 0.53580900  | 2.54381200  | 1.61000300 |
| C  | -1.19999500 | 3.13522400  | 4.49281800 |
| H  | -0.36355000 | 3.03399900  | 6.47401200 |
| H  | -1.72837600 | 3.18467700  | 2.40661700 |
| C  | -2.58432600 | 3.47160300  | 4.94743900 |
| H  | -2.71172900 | 3.29943200  | 6.02085300 |
| H  | -3.32845700 | 2.87061200  | 4.40697000 |
| H  | -2.81968700 | 4.52492200  | 4.74822100 |
| H  | 3.51928100  | -0.07584500 | 4.94326000 |
| H  | 3.27987700  | -1.55978300 | 4.03010100 |
| Au | -0.34359800 | -0.77502700 | 1.63094200 |
| C  | -2.34494400 | -0.78631100 | 2.15282400 |
| C  | -4.30042400 | -1.34084500 | 3.11794100 |
| C  | -4.50676100 | -0.20738500 | 2.40520200 |
| H  | -4.96585500 | -1.93169100 | 3.73235600 |
| H  | -5.39496100 | 0.38875100  | 2.24899300 |
| N  | -2.97267200 | -1.67963700 | 2.95055800 |
| N  | -3.29709000 | 0.11658900  | 1.82043000 |
| C  | -2.36410100 | -2.84975900 | 3.56047500 |
| H  | -1.29259900 | -2.84283600 | 3.34363400 |

|    |             |             |             |
|----|-------------|-------------|-------------|
| H  | -2.51558500 | -2.82126800 | 4.64433400  |
| H  | -2.81179300 | -3.75966500 | 3.14984200  |
| C  | -3.12607500 | 1.20786500  | 0.87763400  |
| H  | -2.05718500 | 1.37610700  | 0.72251200  |
| H  | -3.59147300 | 0.95584300  | -0.08033700 |
| H  | -3.59125300 | 2.11533400  | 1.27402900  |
| C  | 1.56932800  | 0.42099500  | -1.55586300 |
| C  | 1.37562800  | 1.14136300  | -2.66517800 |
| H  | 1.53409800  | 0.94072300  | -0.59539500 |
| H  | 1.19245400  | 2.21140500  | -2.60798700 |
| H  | 1.39046400  | 0.70761900  | -3.66408000 |
| C  | 5.53542100  | -1.62789900 | -1.90249000 |
| C  | 5.45571300  | -0.42567100 | -2.59694400 |
| C  | 5.00784800  | 0.68403100  | -1.89425700 |
| C  | 4.63321200  | 0.59324500  | -0.56449600 |
| C  | 5.16243700  | -1.71261300 | -0.57562300 |
| H  | 5.74140900  | -0.35714900 | -3.64244500 |
| H  | 5.19258800  | -2.61723600 | 0.02073200  |
| N  | 4.70980100  | -0.60537900 | 0.05891600  |
| O  | 4.37652800  | -0.70490200 | 1.32296800  |
| H  | 4.27339700  | 1.42085400  | 0.04207300  |
| Cl | 6.09887600  | -3.05742800 | -2.69652100 |
| Cl | 4.89784000  | 2.22271100  | -2.67563800 |

Electronic Energy (0K) = -3288.4018137

Electronic Energy (0K) + ZPE = -3287.798373

Enthalpy (298K) = -3287.752655

Free Energy (298K) = -3287.878653

## **B**

Number of imaginary frequencies: 0

|   |             |             |             |
|---|-------------|-------------|-------------|
| C | 2.49800200  | -3.83531500 | -1.17977400 |
| C | 2.28361200  | -3.04085400 | -0.06031000 |
| C | 1.87982800  | -1.70496300 | -0.18893200 |
| C | 1.65433000  | -1.16950500 | -1.47654200 |
| C | 1.87486600  | -1.99017200 | -2.59203700 |
| C | 2.30375600  | -3.30238400 | -2.45364000 |
| H | 2.81927700  | -4.86777400 | -1.06032500 |
| H | 2.43879100  | -3.44601100 | 0.93992100  |
| H | 1.68685100  | -1.58972200 | -3.58697000 |
| H | 2.47023500  | -3.91573500 | -3.33610800 |
| C | 1.68726600  | -0.89999300 | 1.03446800  |
| C | 2.72557500  | -0.41952300 | 1.71821700  |
| N | 2.74485500  | 0.17754500  | 2.97299300  |
| C | 2.71524500  | -0.63706900 | 4.19677500  |
| C | 1.39646100  | -0.76012700 | 4.81067900  |
| C | 0.33156800  | -0.84927400 | 5.38513700  |
| C | -0.91794400 | -0.96848900 | 6.06551600  |
| C | -2.01667600 | -0.18057700 | 5.68966400  |
| C | -1.06059500 | -1.89022600 | 7.11457900  |
| C | -3.23092100 | -0.31594500 | 6.35192300  |
| H | -1.90322200 | 0.52935400  | 4.87073100  |
| C | -2.27888100 | -2.02092900 | 7.76797300  |
| H | -0.20781500 | -2.49952700 | 7.40615100  |
| C | -3.36658300 | -1.23663700 | 7.38884500  |
| H | -4.07835700 | 0.29924800  | 6.05600400  |
| H | -2.38063500 | -2.73862300 | 8.57872200  |
| H | -4.31879000 | -1.34094100 | 7.90387900  |
| S | 2.91920600  | 1.84851300  | 3.12079600  |
| O | 3.90069200  | 2.09608200  | 4.16795200  |
| O | 3.13632800  | 2.33966400  | 1.76192600  |



|    |             |             |            |
|----|-------------|-------------|------------|
| C  | 1.35085400  | 2.42931400  | 3.68208400 |
| C  | 1.12506200  | 2.57292800  | 5.04733100 |
| C  | 0.34168000  | 2.65467900  | 2.74661400 |
| C  | -0.14332400 | 2.93734600  | 5.48137000 |
| H  | 1.92799100  | 2.39570400  | 5.75900000 |
| C  | -0.91142800 | 3.03591400  | 3.20103200 |
| H  | 0.54349400  | 2.54415600  | 1.68279500 |
| C  | -1.17690200 | 3.16483500  | 4.56925600 |
| H  | -0.34061700 | 3.03445700  | 6.54760000 |
| H  | -1.70708700 | 3.23326100  | 2.48432100 |
| C  | -2.55404800 | 3.52283600  | 5.03058300 |
| H  | -2.67768500 | 3.35150900  | 6.10478200 |
| H  | -3.31018000 | 2.93121400  | 4.49672300 |
| H  | -2.77709100 | 4.57913500  | 4.83279900 |
| H  | 3.42827000  | -0.21276200 | 4.91665300 |
| H  | 3.10604800  | -1.62601400 | 3.92717100 |
| Au | -0.29667300 | -0.74001800 | 1.66020200 |
| C  | -2.31182000 | -0.74010500 | 2.17408800 |
| C  | -4.28652300 | -1.31223100 | 3.09697200 |
| C  | -4.47930300 | -0.16201700 | 2.40844500 |
| H  | -4.96209300 | -1.91484500 | 3.68851600 |
| H  | -5.36360700 | 0.44019700  | 2.25327200 |
| N  | -2.95683400 | -1.64994800 | 2.94059600 |
| N  | -3.25956500 | 0.17178100  | 1.84935000 |
| C  | -2.35992900 | -2.83560200 | 3.53056400 |
| H  | -1.29302600 | -2.84626600 | 3.29265800 |
| H  | -2.48947500 | -2.81585500 | 4.61769000 |
| H  | -2.83196400 | -3.73337600 | 3.12026000 |
| C  | -3.07686600 | 1.27957300  | 0.92887900 |
| H  | -2.00613600 | 1.45604300  | 0.79549800 |

|    |             |             |             |
|----|-------------|-------------|-------------|
| H  | -3.52451400 | 1.04281700  | -0.04163000 |
| H  | -3.55279500 | 2.17839800  | 1.33256800  |
| C  | 1.23039600  | 0.22803600  | -1.62046600 |
| C  | 1.35929300  | 0.98187700  | -2.71701000 |
| H  | 0.77747200  | 0.67448900  | -0.73019200 |
| H  | 0.99673900  | 2.00641900  | -2.74124900 |
| H  | 1.82912100  | 0.61324200  | -3.62915600 |
| C  | 5.37245900  | -1.44037900 | -1.90190500 |
| C  | 5.24984400  | -0.22753100 | -2.57476100 |
| C  | 4.71660700  | 0.85656800  | -1.88842700 |
| C  | 4.29604500  | 0.72882100  | -0.57439700 |
| C  | 4.96755400  | -1.55595900 | -0.58530100 |
| H  | 5.57181400  | -0.13113300 | -3.60835500 |
| H  | 5.03216600  | -2.45684200 | 0.01449100  |
| N  | 4.43590500  | -0.47316800 | 0.01023900  |
| O  | 4.13688200  | -0.60804100 | 1.33315000  |
| H  | 3.87210200  | 1.52148300  | 0.04124100  |
| Cl | 6.03223300  | -2.82137300 | -2.69295000 |
| Cl | 4.55873900  | 2.38936400  | -2.65906100 |

Electronic Energy (0K) = -3288.4146607

Electronic Energy (0K) + ZPE = -3287.809365

Enthalpy (298K) = -3287.763699

Free Energy (298K) = -3287.889657

### **TS<sub>BI</sub>**

Number of imaginary frequencies: 1

|   |            |            |             |
|---|------------|------------|-------------|
| C | 1.36287100 | 0.08147500 | -0.56402900 |
| C | 0.21272600 | 0.52847500 | -0.98844500 |
| N | 0.07714000 | 1.76639300 | -1.58137800 |
| C | 1.24030000 | 2.66933400 | -1.37971400 |

|   |             |             |             |
|---|-------------|-------------|-------------|
| C | 2.39445000  | 1.83678200  | -1.06399000 |
| C | 3.57107800  | 1.51957100  | -0.88391000 |
| C | 4.81486400  | 0.92692100  | -0.59939700 |
| C | 5.54685300  | 0.29700600  | -1.62508200 |
| C | 5.28835700  | 0.89673800  | 0.72631900  |
| C | 6.72828800  | -0.35831200 | -1.32174600 |
| H | 5.16708900  | 0.32809300  | -2.64364900 |
| C | 6.46832100  | 0.23210400  | 1.01727500  |
| H | 4.71526800  | 1.39107600  | 1.50759800  |
| C | 7.18397400  | -0.39411600 | -0.00345800 |
| H | 7.29560700  | -0.84772000 | -2.10882400 |
| H | 6.83554900  | 0.19902100  | 2.03944900  |
| S | -1.44494000 | 2.50968300  | -1.70886300 |
| O | -2.35579100 | 1.50367600  | -2.23146300 |
| O | -1.17456400 | 3.74311400  | -2.43045800 |
| C | -1.90652500 | 2.90197800  | -0.04754800 |
| C | -2.65783900 | 1.98635300  | 0.69070500  |
| C | -1.45797500 | 4.09354000  | 0.51941900  |
| C | -2.94254200 | 2.26878300  | 2.01779000  |
| H | -3.02103200 | 1.07414400  | 0.22091900  |
| C | -1.75418000 | 4.35573700  | 1.85147100  |
| H | -0.90528700 | 4.81549000  | -0.07733200 |
| C | -2.48998900 | 3.44984700  | 2.61941600  |
| H | -3.53329800 | 1.56584100  | 2.60352000  |
| H | -1.41298000 | 5.28515700  | 2.30367300  |
| C | -2.81366200 | 3.73594700  | 4.05144500  |
| H | -2.54945500 | 2.88766400  | 4.69420400  |
| H | -2.28470000 | 4.62166400  | 4.41625000  |
| H | -3.88913700 | 3.90989200  | 4.18194700  |
| H | 1.40662100  | 3.26291600  | -2.28352400 |

|    |             |             |             |
|----|-------------|-------------|-------------|
| H  | 1.05122100  | 3.35761800  | -0.53960400 |
| H  | 8.10924300  | -0.91537400 | 0.23107200  |
| C  | 2.11900100  | -0.85683600 | 0.20158400  |
| C  | 3.00118000  | -1.73628500 | -0.44886600 |
| C  | 1.98475100  | -0.89358300 | 1.61456400  |
| C  | 3.73712000  | -2.66055000 | 0.27427700  |
| H  | 3.08796600  | -1.67688100 | -1.53220100 |
| C  | 2.72862600  | -1.84639500 | 2.31838600  |
| C  | 3.59095400  | -2.71491200 | 1.66073300  |
| H  | 4.42474600  | -3.33153300 | -0.23403000 |
| H  | 2.65423000  | -1.88271800 | 3.40313200  |
| H  | 4.16749200  | -3.43437500 | 2.23775300  |
| C  | 1.09122100  | 0.04285400  | 2.30351400  |
| H  | 0.91027400  | 0.99490100  | 1.79856900  |
| C  | 0.48521000  | -0.19414900 | 3.47066600  |
| H  | 0.59488600  | -1.13824000 | 4.00329100  |
| H  | -0.15017500 | 0.55622300  | 3.93426900  |
| Au | -1.24292900 | -0.95519700 | -0.64072700 |
| C  | -2.61413000 | -2.43085200 | -0.22849500 |
| C  | -3.57479000 | -4.26938200 | 0.63609900  |
| C  | -4.50538400 | -3.64012800 | -0.12224100 |
| H  | -3.62169300 | -5.18138500 | 1.21432300  |
| H  | -5.53390700 | -3.88772300 | -0.34405800 |
| N  | -3.89625600 | -2.51539000 | -0.64336900 |
| N  | -2.42162500 | -3.51393200 | 0.55697400  |
| C  | -1.18107800 | -3.81399400 | 1.25545400  |
| H  | -0.33795500 | -3.76034100 | 0.56067200  |
| H  | -1.02410300 | -3.10322900 | 2.07343900  |
| H  | -1.24297800 | -4.82508400 | 1.66313500  |
| C  | -4.56575100 | -1.54605400 | -1.49519800 |

|   |             |             |             |
|---|-------------|-------------|-------------|
| H | -3.82310100 | -0.84544100 | -1.88654700 |
| H | -5.05192900 | -2.05969200 | -2.32885800 |
| H | -5.31777600 | -0.99556300 | -0.92158600 |

Electronic Energy (0K) = -2046.0079467

Electronic Energy (0K) + ZPE = -2045.479566

Enthalpy (298K) = -2045.442564

Free Energy (298K) = -2045.549140

### **TS<sub>B2</sub>**

Number of imaginary frequencies: 1

|   |             |             |             |
|---|-------------|-------------|-------------|
| C | 1.13636300  | 0.36643400  | 1.05938400  |
| C | 0.32801100  | 0.87760200  | 0.15308800  |
| N | 0.23300700  | 2.13145500  | -0.36084400 |
| C | 1.34059900  | 3.11599000  | -0.25962000 |
| C | 2.61500600  | 2.48829300  | -0.55965900 |
| C | 3.63899600  | 1.86877600  | -0.75787400 |
| C | 4.82550400  | 1.10257300  | -0.96221900 |
| C | 5.55689500  | 1.20817800  | -2.15366300 |
| C | 5.25090400  | 0.20966000  | 0.03369600  |
| C | 6.69165600  | 0.43064800  | -2.34167000 |
| H | 5.22291400  | 1.89994800  | -2.92353900 |
| C | 6.38168100  | -0.56956300 | -0.16640700 |
| H | 4.68027600  | 0.13134200  | 0.95886600  |
| C | 7.10415700  | -0.45949700 | -1.35251700 |
| H | 7.25603400  | 0.51646000  | -3.26707700 |
| H | 6.70129300  | -1.26406300 | 0.60733900  |
| S | -1.18260200 | 2.57563800  | -1.23599500 |
| O | -1.39093700 | 1.64706700  | -2.33950600 |
| O | -1.00351800 | 3.99385600  | -1.51026900 |
| C | -2.45257300 | 2.33012500  | -0.03191000 |

|   |             |             |             |
|---|-------------|-------------|-------------|
| C | -3.59393400 | 1.62237000  | -0.39246900 |
| C | -2.30179700 | 2.87757800  | 1.24122900  |
| C | -4.59737400 | 1.44810500  | 0.55286600  |
| H | -3.68906200 | 1.21349000  | -1.39542700 |
| C | -3.31256200 | 2.68787500  | 2.17057600  |
| H | -1.39858500 | 3.42674200  | 1.50668300  |
| C | -4.47179500 | 1.97204600  | 1.84219500  |
| H | -5.49556300 | 0.89353600  | 0.28665700  |
| H | -3.20643100 | 3.10050200  | 3.17233600  |
| C | -5.56343400 | 1.79933000  | 2.84956600  |
| H | -5.15999500 | 1.66543100  | 3.85895400  |
| H | -6.20776300 | 2.68770700  | 2.87565900  |
| H | -6.19897700 | 0.94059700  | 2.61118800  |
| H | 1.12454400  | 3.92986000  | -0.95804100 |
| H | 1.34133100  | 3.55505800  | 0.74835700  |
| H | 7.99148300  | -1.06881600 | -1.50723400 |
| C | 1.95703200  | -0.73448100 | 1.39522100  |
| C | 2.20757500  | -1.83000100 | 0.53561800  |
| C | 2.55586900  | -0.70562200 | 2.68782100  |
| C | 2.94114600  | -2.89818800 | 1.00341000  |
| H | 1.79539300  | -1.82662300 | -0.47161600 |
| C | 3.28378900  | -1.81796100 | 3.14707900  |
| C | 3.47737900  | -2.89448400 | 2.30803300  |
| H | 3.11308200  | -3.75597100 | 0.35794300  |
| H | 3.71909100  | -1.79912700 | 4.14360800  |
| H | 4.06283000  | -3.74627500 | 2.64534100  |
| C | 2.32624600  | 0.51432100  | 3.38497100  |
| H | 2.25575100  | 0.53290800  | 4.47161500  |
| C | 2.03075100  | 1.60523000  | 2.61318700  |
| H | 1.56634100  | 2.49630700  | 3.03403600  |

|    |             |             |             |
|----|-------------|-------------|-------------|
| H  | 2.58107700  | 1.76508500  | 1.68029200  |
| Au | -0.99005500 | -0.72790100 | -0.30632500 |
| C  | -2.21880000 | -2.30855300 | -0.78538000 |
| C  | -3.68465700 | -3.64169500 | -1.84548700 |
| C  | -3.23152000 | -4.31503000 | -0.76062100 |
| H  | -4.39556200 | -3.91597000 | -2.61205400 |
| H  | -3.45992900 | -5.30263100 | -0.38528600 |
| N  | -3.05132100 | -2.41461400 | -1.84416600 |
| N  | -2.33597000 | -3.48048600 | -0.12196400 |
| C  | -1.57233800 | -3.85097000 | 1.05773400  |
| H  | -0.73194400 | -4.49575600 | 0.78146300  |
| H  | -1.18852200 | -2.94165000 | 1.52801500  |
| H  | -2.22034600 | -4.37775900 | 1.76262200  |
| C  | -3.26967100 | -1.39066900 | -2.85310800 |
| H  | -4.29413700 | -1.01095300 | -2.78869800 |
| H  | -2.56144700 | -0.57322000 | -2.69001000 |
| H  | -3.10621000 | -1.81459200 | -3.84780200 |

Electronic Energy (0K) = -2045.9953734

Electronic Energy (0K) + ZPE = -2045.468564

Enthalpy (298K) = -2045.431255

Free Energy (298K) = -2045.540560

### **TS<sub>B3</sub>**

Number of imaginary frequencies: 1

|   |             |            |             |
|---|-------------|------------|-------------|
| C | 1.35253300  | 3.68421600 | -1.87741200 |
| C | 0.72902900  | 2.52021800 | -1.43866300 |
| C | -0.62459800 | 2.58177400 | -1.01953900 |
| C | -1.33102900 | 3.78836500 | -1.04210400 |
| C | -0.68547100 | 4.93813900 | -1.47868700 |
| C | 0.64628100  | 4.88455000 | -1.89287500 |

|   |             |             |             |
|---|-------------|-------------|-------------|
| H | 2.39119400  | 3.65045800  | -2.20181300 |
| H | -2.37109600 | 3.80057200  | -0.71997500 |
| H | -1.22179800 | 5.88365900  | -1.49896000 |
| H | 1.14119300  | 5.79240900  | -2.23088700 |
| C | -1.19178700 | 1.32879000  | -0.60201100 |
| C | -2.05550300 | 0.51862800  | -0.22703400 |
| N | -2.79779200 | -0.47403900 | 0.21573700  |
| C | -2.60278500 | -0.97791200 | 1.60642800  |
| C | -1.22521300 | -1.36645500 | 1.86338600  |
| C | -0.04746600 | -1.61090000 | 2.02048900  |
| C | 1.35561200  | -1.84711100 | 2.14900600  |
| C | 1.98034400  | -2.81914100 | 1.35269200  |
| C | 2.13151000  | -1.07011400 | 3.02405500  |
| C | 3.35508700  | -3.00486500 | 1.42584300  |
| H | 1.37185200  | -3.42263000 | 0.68127600  |
| C | 3.50595900  | -1.26479700 | 3.09296300  |
| H | 1.64632300  | -0.31781300 | 3.64261400  |
| C | 4.12070200  | -2.22706300 | 2.29288100  |
| H | 3.82844100  | -3.76455500 | 0.80718800  |
| H | 4.10295000  | -0.66234600 | 3.77465300  |
| H | 5.19898600  | -2.36885900 | 2.34650500  |
| S | -3.45183700 | -1.56526200 | -0.99763400 |
| O | -3.93180100 | -0.70141500 | -2.05898900 |
| O | -4.33908800 | -2.44259100 | -0.25323600 |
| C | -2.01774200 | -2.43392700 | -1.52900000 |
| C | -1.22365500 | -1.87532100 | -2.53285400 |
| C | -1.63390700 | -3.58146000 | -0.83971000 |
| C | -0.00905600 | -2.47709700 | -2.82563100 |
| H | -1.54867700 | -0.98622000 | -3.06816300 |
| C | -0.41609500 | -4.16847000 | -1.15524100 |



|    |             |             |             |
|----|-------------|-------------|-------------|
| H  | -2.27392700 | -4.00364500 | -0.06825000 |
| C  | 0.42180700  | -3.61277300 | -2.12757500 |
| H  | 0.62649700  | -2.05772400 | -3.60421100 |
| H  | -0.09956200 | -5.06580900 | -0.62619600 |
| C  | 1.76627700  | -4.20216300 | -2.41023600 |
| H  | 2.55613100  | -3.45701400 | -2.24374400 |
| H  | 1.97087800  | -5.06714300 | -1.77137000 |
| H  | 1.84795500  | -4.52113400 | -3.45639000 |
| H  | -2.90570500 | -0.16494200 | 2.27865200  |
| H  | -3.31266400 | -1.80024300 | 1.75422900  |
| O  | -4.33002400 | 2.74386000  | -0.69082800 |
| C  | 1.27208300  | 1.13901900  | -1.44706800 |
| C  | 0.61300900  | 0.35652000  | -0.45622100 |
| H  | 1.29562700  | 0.69206300  | -2.44864800 |
| H  | 0.48598000  | -0.72043500 | -0.58022700 |
| H  | 0.62099600  | 0.69550100  | 0.57908000  |
| C  | -4.81386500 | 1.88699700  | 1.37604000  |
| C  | -5.91874500 | 1.11410000  | -0.56005500 |
| C  | -5.52873700 | 0.98295100  | 2.13854300  |
| C  | -6.62547100 | 0.20795900  | 0.20474400  |
| H  | -6.01299800 | 1.21883400  | -1.63390700 |
| C  | -6.44671400 | 0.10479200  | 1.57904200  |
| H  | -6.99897200 | -0.61083200 | 2.17944100  |
| N  | -5.00372700 | 1.93957500  | 0.02483900  |
| Au | 3.21961100  | 0.80175900  | -0.55858900 |
| C  | 5.06316100  | 0.50971100  | 0.33978800  |
| N  | 5.99502100  | -0.42711500 | 0.05533100  |
| C  | 6.77616000  | 0.66712200  | 1.78986500  |
| C  | 7.05698600  | -0.34650000 | 0.93441200  |
| H  | 7.32809800  | 1.07016600  | 2.62748300  |

|    |             |             |             |
|----|-------------|-------------|-------------|
| H  | 7.90261400  | -1.01721500 | 0.87187500  |
| N  | 5.55117100  | 1.17759600  | 1.40983000  |
| C  | 5.89470500  | -1.41605200 | -1.00351600 |
| H  | 4.90364000  | -1.33804700 | -1.45824500 |
| H  | 6.66142000  | -1.23950600 | -1.76339900 |
| H  | 6.02428600  | -2.41849200 | -0.58412300 |
| C  | 4.88980600  | 2.28555500  | 2.07847300  |
| H  | 5.32257000  | 3.23926200  | 1.76164300  |
| H  | 3.82640800  | 2.26640900  | 1.82406200  |
| H  | 5.00597900  | 2.17692400  | 3.16012700  |
| H  | -4.07770100 | 2.58022500  | 1.76814800  |
| Cl | -7.76196900 | -0.82443400 | -0.60271000 |
| Cl | -5.23576400 | 0.95082800  | 3.85313000  |

Electronic Energy (0K) = -3288.3736749

Electronic Energy (0K) + ZPE = -3287.769472

Enthalpy (298K) = -3287.724122

Free Energy (298K) = -3287.848792

#### **TS<sub>B4</sub>**

Number of imaginary frequencies: 1

|   |             |             |             |
|---|-------------|-------------|-------------|
| C | -2.99307000 | -0.14711000 | 2.39353700  |
| C | -1.93193400 | -0.02366100 | 1.49045600  |
| C | -1.89098800 | 1.10949700  | 0.62860200  |
| C | -2.96610600 | 2.02278800  | 0.67372500  |
| C | -4.01704200 | 1.85912600  | 1.56270200  |
| C | -4.03019700 | 0.77582900  | 2.44228800  |
| H | -2.99628700 | -0.99237700 | 3.08113200  |
| H | -2.95717500 | 2.87036300  | -0.01240200 |
| H | -4.82724200 | 2.58630300  | 1.57692600  |
| H | -4.84133500 | 0.65166100  | 3.15594900  |

|   |             |             |             |
|---|-------------|-------------|-------------|
| C | -0.84953700 | 1.26443700  | -0.33585300 |
| C | 0.24121000  | 1.89351700  | -0.57883300 |
| N | 1.01821300  | 1.94503100  | -1.76103600 |
| C | 0.21601600  | 1.52818000  | -2.91108800 |
| C | -0.39532300 | 0.20276500  | -2.74472200 |
| C | -0.80053300 | -0.97946900 | -2.76248300 |
| C | -1.60380400 | -2.01918500 | -2.15771400 |
| C | -1.23643700 | -3.36737700 | -2.25080500 |
| C | -2.74092600 | -1.65763400 | -1.42222100 |
| C | -1.99038500 | -4.33936400 | -1.60519800 |
| H | -0.35034800 | -3.63895000 | -2.82500700 |
| C | -3.49606900 | -2.63646600 | -0.79134100 |
| H | -3.01155100 | -0.60673700 | -1.34080800 |
| C | -3.12185500 | -3.97571500 | -0.87860500 |
| H | -1.69759000 | -5.38439700 | -1.67365400 |
| H | -4.37246800 | -2.34840900 | -0.21471600 |
| H | -3.71346100 | -4.73914300 | -0.37848700 |
| S | 2.64328800  | 1.37888400  | -1.70521800 |
| O | 3.45074600  | 2.45756000  | -1.16016100 |
| O | 2.92222500  | 0.87695400  | -3.05101100 |
| C | 2.68876200  | 0.02829000  | -0.55638700 |
| C | 3.19661000  | 0.25079700  | 0.72130100  |
| C | 2.22873100  | -1.22928400 | -0.94130800 |
| C | 3.22535900  | -0.80240500 | 1.62483000  |
| H | 3.57086800  | 1.23467300  | 0.99299700  |
| C | 2.25662600  | -2.26782000 | -0.01990600 |
| H | 1.85077100  | -1.39729300 | -1.94940600 |
| C | 2.74625600  | -2.06940200 | 1.27528000  |
| H | 3.62564100  | -0.64239200 | 2.62563000  |
| H | 1.89039200  | -3.25239600 | -0.30873400 |

|    |             |             |             |
|----|-------------|-------------|-------------|
| C  | 2.75016300  | -3.17656500 | 2.28117200  |
| H  | 3.73683800  | -3.28793900 | 2.74619400  |
| H  | 2.03843100  | -2.96484400 | 3.08980900  |
| H  | 2.47292400  | -4.13559900 | 1.83176600  |
| H  | -0.57449900 | 2.27912300  | -3.03196400 |
| H  | 0.83180100  | 1.55315100  | -3.81541200 |
| O  | 0.99978200  | 2.92985800  | 0.38890600  |
| C  | -0.88325000 | -1.04304400 | 1.38453400  |
| C  | -0.95924900 | -2.30910400 | 1.80854300  |
| H  | 0.02306200  | -0.73310500 | 0.85832900  |
| H  | -1.84472200 | -2.71613500 | 2.29664600  |
| H  | -0.13057300 | -2.99778000 | 1.65101000  |
| C  | -0.60217400 | 4.54820800  | 0.84895000  |
| C  | -0.00520900 | 2.94531600  | 2.49398000  |
| C  | -1.52436700 | 5.11157700  | 1.70464500  |
| C  | -0.92419400 | 3.48322500  | 3.37302600  |
| C  | -1.69475200 | 4.56469100  | 2.97070600  |
| H  | -1.02719000 | 3.03994700  | 4.35760700  |
| H  | -2.42610500 | 4.99033800  | 3.65102300  |
| N  | 0.14743700  | 3.47507100  | 1.24474500  |
| Au | 0.57940100  | -1.38862100 | -4.41121600 |
| C  | 1.81735500  | -2.02997800 | -5.91333200 |
| N  | 1.49056100  | -2.31731000 | -7.19136600 |
| C  | 3.64391300  | -2.70556200 | -7.02754300 |
| C  | 2.60157000  | -2.73603000 | -7.89439700 |
| H  | 4.68936600  | -2.94534100 | -7.16058000 |
| H  | 2.54831000  | -3.00658800 | -8.93944300 |
| N  | 3.14373700  | -2.26928000 | -5.81852400 |
| C  | 3.93240000  | -2.11016800 | -4.60370000 |
| H  | 3.71898400  | -1.14095400 | -4.14273800 |

|    |             |             |             |
|----|-------------|-------------|-------------|
| H  | 3.70574800  | -2.91424600 | -3.89661300 |
| H  | 4.99104500  | -2.15530900 | -4.86720800 |
| C  | 0.15874900  | -2.21049600 | -7.76319300 |
| H  | -0.22483000 | -3.20376200 | -8.01361400 |
| H  | -0.49909300 | -1.74110000 | -7.02741100 |
| H  | 0.19245200  | -1.59491900 | -8.66610200 |
| H  | -2.10233400 | 5.96447400  | 1.36500100  |
| Cl | -0.34583600 | 5.13782100  | -0.72776100 |
| Cl | 0.97813700  | 1.62563100  | 2.91682300  |

Electronic Energy (0K) = -3288.3407044

Electronic Energy (0K) + ZPE = -3287.739855

Enthalpy (298K) = -3287.693633

Free Energy (298K) = -3287.821611

### **TSc**

Number of imaginary frequencies: 1

|   |             |             |             |
|---|-------------|-------------|-------------|
| C | -0.45212900 | -3.81134300 | -1.67630400 |
| C | -0.30609100 | -3.04219600 | -0.53049900 |
| C | 0.30868300  | -1.78362600 | -0.58674800 |
| C | 0.73062100  | -1.26648400 | -1.83236600 |
| C | 0.53148300  | -2.04473400 | -2.98216300 |
| C | -0.03434200 | -3.30911900 | -2.90854900 |
| H | -0.90776700 | -4.79659100 | -1.61071500 |
| H | -0.64657600 | -3.41959800 | 0.43301500  |
| H | 0.80774800  | -1.63214300 | -3.95108200 |
| H | -0.17388900 | -3.89445300 | -3.81419800 |
| C | 0.50031800  | -1.03112700 | 0.66418100  |
| C | 1.76516700  | -0.97950100 | 1.20778700  |
| N | 2.17589300  | -0.12769100 | 2.25824000  |
| C | 2.36415100  | -0.67676000 | 3.60816100  |

|   |             |             |            |
|---|-------------|-------------|------------|
| C | 1.18334700  | -0.52510200 | 4.45405500 |
| C | 0.22819600  | -0.34608000 | 5.18064300 |
| C | -0.88237400 | -0.12587600 | 6.05155500 |
| C | -1.80566000 | 0.89808500  | 5.78697100 |
| C | -1.05953800 | -0.93460800 | 7.18457600 |
| C | -2.87863400 | 1.10760400  | 6.64523600 |
| H | -1.66844900 | 1.52358800  | 4.90446300 |
| C | -2.13680900 | -0.72000100 | 8.03423100 |
| H | -0.34305500 | -1.72731100 | 7.38839000 |
| C | -3.04845400 | 0.30014700  | 7.76787400 |
| H | -3.58520900 | 1.90889400  | 6.43802100 |
| H | -2.26433200 | -1.35014700 | 8.91122400 |
| H | -3.88706100 | 0.46916300  | 8.43936400 |
| S | 2.55617500  | 1.48688800  | 1.98100600 |
| O | 3.82998400  | 1.72191700  | 2.65623100 |
| O | 2.45289100  | 1.67291500  | 0.53852600 |
| C | 1.32281000  | 2.45563600  | 2.78688500 |
| C | 1.47442300  | 2.76947600  | 4.13456900 |
| C | 0.19730500  | 2.85151700  | 2.06639100 |
| C | 0.46427400  | 3.47461200  | 4.77531300 |
| H | 2.36853000  | 2.46748000  | 4.67482300 |
| C | -0.78946000 | 3.57318300  | 2.72200100 |
| H | 0.11203500  | 2.61485400  | 1.00743100 |
| C | -0.68169600 | 3.87659400  | 4.08367400 |
| H | 0.55893100  | 3.70964000  | 5.83406200 |
| H | -1.66677300 | 3.90879700  | 2.17141100 |
| C | -1.78956800 | 4.60293700  | 4.77856800 |
| H | -1.70613800 | 4.51921400  | 5.86715000 |
| H | -2.76735500 | 4.20763100  | 4.47294000 |
| H | -1.78447800 | 5.67115900  | 4.52662200 |

|    |             |             |             |
|----|-------------|-------------|-------------|
| H  | 3.23252600  | -0.19242100 | 4.07456400  |
| H  | 2.63330000  | -1.73412100 | 3.49331300  |
| Au | -1.21136200 | -0.34392800 | 1.59182900  |
| C  | -3.02879200 | 0.20284500  | 2.45060600  |
| C  | -4.83727500 | 0.24989200  | 3.79089200  |
| C  | -4.92213200 | 1.31433200  | 2.95702800  |
| H  | -5.48478800 | -0.08743300 | 4.58847800  |
| H  | -5.66750900 | 2.09179200  | 2.86204100  |
| N  | -3.67294900 | -0.41690600 | 3.46586100  |
| N  | -3.80734700 | 1.26574700  | 2.14166400  |
| C  | -3.25210800 | -1.65826000 | 4.09346000  |
| H  | -2.17976500 | -1.79537700 | 3.93181800  |
| H  | -3.45356000 | -1.61108800 | 5.16730600  |
| H  | -3.79483600 | -2.50349400 | 3.65825800  |
| C  | -3.58324900 | 2.17334800  | 1.03060100  |
| H  | -2.56227800 | 2.03711800  | 0.66377200  |
| H  | -4.28621100 | 1.95652900  | 0.22028500  |
| H  | -3.72450000 | 3.20701200  | 1.36018600  |
| C  | 1.33238300  | 0.06998300  | -1.90189700 |
| C  | 2.18486400  | 0.49758700  | -2.83809400 |
| H  | 1.07978300  | 0.75400400  | -1.09025700 |
| H  | 2.58520900  | 1.50845300  | -2.80359000 |
| H  | 2.51527800  | -0.13199600 | -3.66489400 |
| C  | 4.72007900  | -1.78501500 | -2.34287100 |
| C  | 5.65673700  | -0.78358500 | -2.11003100 |
| C  | 5.65023900  | -0.14474600 | -0.87418000 |
| C  | 4.72780800  | -0.51354300 | 0.09925500  |
| C  | 3.79497900  | -2.11779700 | -1.36104300 |
| H  | 6.37602100  | -0.50461000 | -2.87576200 |
| H  | 3.01405800  | -2.86761900 | -1.48078600 |

|    |            |             |             |
|----|------------|-------------|-------------|
| N  | 3.85811100 | -1.46376900 | -0.21239600 |
| O  | 2.63177500 | -1.92412200 | 0.87362200  |
| H  | 4.69633200 | -0.07395200 | 1.09469500  |
| Cl | 4.66035600 | -2.60353300 | -3.86350900 |
| Cl | 6.78213700 | 1.11061100  | -0.52535000 |

Electronic Energy (0K) = -3288.3956552

Electronic Energy (0K) + ZPE = -3287.791655

Enthalpy (298K) = -3287.746615

Free Energy (298K) = -3287.869655

### [N]

Number of imaginary frequencies: 0

|    |             |             |             |
|----|-------------|-------------|-------------|
| C  | 1.14641700  | 1.38029400  | 0.00018900  |
| C  | -1.14661900 | 1.38001400  | -0.00024100 |
| C  | 1.18077700  | -0.01123300 | 0.00014900  |
| C  | -1.18067100 | -0.01118500 | -0.00010300 |
| H  | -2.07375300 | 1.95202800  | -0.00038800 |
| C  | 0.00002100  | -0.73970200 | 0.00002000  |
| H  | -0.00002900 | -1.82604300 | -0.00005000 |
| N  | -0.00018800 | 2.05624200  | 0.00001000  |
| H  | 2.07348300  | 1.95236000  | 0.00046300  |
| Cl | -2.71498900 | -0.83714100 | 0.00006500  |
| Cl | 2.71511100  | -0.83704500 | -0.00007600 |

Electronic Energy (0K) = -1167.2318682

Electronic Energy (0K) + ZPE = -1167.162383

Enthalpy (298K) = -1167.154891

Free Energy (298K) = -1167.194318

### C

Number of imaginary frequencies: 0



|   |             |             |             |
|---|-------------|-------------|-------------|
| C | -1.09663900 | -2.74916100 | 3.14778500  |
| C | -0.33879700 | -2.06251400 | 2.19981000  |
| C | -0.96302000 | -0.99037300 | 1.47699500  |
| C | -2.33863100 | -0.72765000 | 1.70997000  |
| C | -3.06569500 | -1.42736200 | 2.65024100  |
| C | -2.43050400 | -2.43176500 | 3.38192700  |
| H | -0.63918400 | -3.57670600 | 3.68483400  |
| H | -2.80362800 | 0.07893000  | 1.14544400  |
| H | -4.11414000 | -1.19952000 | 2.81954200  |
| H | -2.98707000 | -2.99172000 | 4.13005800  |
| C | -0.28283100 | -0.13024400 | 0.57296200  |
| C | 1.18667300  | 0.04189200  | 0.63114200  |
| N | 1.98286600  | -0.26408500 | -0.45323500 |
| C | 1.47574000  | -0.82075100 | -1.72389700 |
| C | 0.21776600  | -1.51537700 | -1.52448000 |
| C | -0.83401100 | -2.11513800 | -1.40701300 |
| C | -2.09884500 | -2.69803700 | -1.13370000 |
| C | -2.18730300 | -3.85001800 | -0.33697300 |
| C | -3.27139600 | -2.07267200 | -1.59256000 |
| C | -3.43310100 | -4.35662900 | 0.00668700  |
| H | -1.27455800 | -4.32863400 | 0.01289100  |
| C | -4.51067900 | -2.59439300 | -1.25198600 |
| H | -3.19045900 | -1.17992500 | -2.21118000 |
| C | -4.59217400 | -3.73194200 | -0.44926400 |
| H | -3.50062700 | -5.24389600 | 0.63126300  |
| H | -5.41794700 | -2.11413200 | -1.61039200 |
| H | -5.56548400 | -4.13555000 | -0.18043400 |
| S | 3.62676700  | 0.28715000  | -0.43529800 |
| O | 3.63200000  | 1.70705600  | -0.13426500 |
| O | 4.14733600  | -0.19516100 | -1.70654700 |

|    |             |             |             |
|----|-------------|-------------|-------------|
| C  | 4.35415300  | -0.63720100 | 0.87708200  |
| C  | 4.48990800  | -0.07104500 | 2.14035800  |
| C  | 4.79116500  | -1.93296200 | 0.59917500  |
| C  | 5.07882500  | -0.82757300 | 3.14502600  |
| H  | 4.14222800  | 0.94003200  | 2.32875600  |
| C  | 5.37682200  | -2.66853300 | 1.61787700  |
| H  | 4.69113300  | -2.34651300 | -0.40206200 |
| C  | 5.52509900  | -2.12963000 | 2.90275000  |
| H  | 5.19943200  | -0.39852300 | 4.13794800  |
| H  | 5.73446500  | -3.67726100 | 1.41765100  |
| C  | 6.12141700  | -2.95313400 | 3.99902200  |
| H  | 6.42817800  | -2.33449800 | 4.84805800  |
| H  | 5.39232500  | -3.68571400 | 4.37120000  |
| H  | 6.99193000  | -3.51865700 | 3.64844600  |
| H  | 1.34680500  | -0.01525600 | -2.46142800 |
| H  | 2.23251600  | -1.50636300 | -2.12175600 |
| O  | 1.61541600  | 0.58839300  | 1.63862000  |
| C  | 1.03593600  | -2.49574700 | 1.93762300  |
| C  | 1.87557900  | -2.93603500 | 2.87839700  |
| H  | 1.37842100  | -2.46322700 | 0.90214500  |
| H  | 1.60244200  | -2.96015800 | 3.93231900  |
| H  | 2.88340300  | -3.25556600 | 2.61896000  |
| Au | -1.11858000 | 1.39955100  | -0.54564200 |
| C  | -3.28607900 | 4.28449700  | -2.83001900 |
| C  | -2.02254700 | 4.70252900  | -3.08647000 |
| H  | -4.24356400 | 4.65904100  | -3.16385200 |
| H  | -1.64977800 | 5.52167300  | -3.68530000 |
| C  | -4.31695900 | 2.43211700  | -1.50394000 |
| H  | -3.95863800 | 1.68756200  | -0.78734900 |
| H  | -5.02318700 | 3.10220100  | -1.00639000 |

|   |             |            |             |
|---|-------------|------------|-------------|
| H | -4.81983200 | 1.92493900 | -2.33291000 |
| C | 0.27140900  | 3.98347100 | -2.39565200 |
| H | 0.56750500  | 4.86646600 | -1.82203100 |
| H | 0.70394100  | 3.09252700 | -1.93107200 |
| H | 0.64006700  | 4.07366000 | -3.42069500 |
| C | -1.88210000 | 2.91744200 | -1.72756300 |
| N | -1.17708300 | 3.85145400 | -2.40517000 |
| N | -3.17903900 | 3.19073500 | -1.99532600 |

Electronic Energy (0K) = -2121.2356099

Electronic Energy (0K) + ZPE = -2120.701940

Enthalpy (298K) = -2120.663201

Free Energy (298K) = -2120.774683

### **TS<sub>b</sub>**

Number of imaginary frequencies: 1

|   |             |             |             |
|---|-------------|-------------|-------------|
| C | -1.80384500 | -1.66433900 | 1.97040800  |
| C | -1.05715300 | -1.01033700 | 0.98850300  |
| C | -1.68773800 | 0.02165100  | 0.22921900  |
| C | -3.05237900 | 0.29474600  | 0.46334200  |
| C | -3.77167700 | -0.36592800 | 1.44380700  |
| C | -3.13519800 | -1.34127900 | 2.20800000  |
| H | -1.33596900 | -2.46803300 | 2.53477700  |
| H | -3.52503800 | 1.07725200  | -0.12875800 |
| H | -4.81846200 | -0.12745900 | 1.61152900  |
| H | -3.68433300 | -1.87135200 | 2.98285800  |
| C | -0.99791800 | 0.82898200  | -0.74919500 |
| C | 0.44963100  | 1.11889500  | -0.57475800 |
| N | 1.28550200  | 0.85160200  | -1.63983400 |
| C | 0.78374000  | 0.13864100  | -2.81867100 |
| C | -0.54622700 | -0.38413200 | -2.51392300 |

|   |             |             |             |
|---|-------------|-------------|-------------|
| C | -1.58987800 | -1.03179100 | -2.56151700 |
| C | -2.86270900 | -1.59805600 | -2.36215800 |
| C | -2.99549000 | -2.73880500 | -1.54884300 |
| C | -4.00874200 | -0.96116900 | -2.87924500 |
| C | -4.25897900 | -3.21862000 | -1.24198300 |
| H | -2.10198800 | -3.22567800 | -1.16394500 |
| C | -5.26477700 | -1.45660300 | -2.57145000 |
| H | -3.89045800 | -0.08410100 | -3.51310200 |
| C | -5.38878700 | -2.57893300 | -1.75030800 |
| H | -4.36673900 | -4.09269600 | -0.60543000 |
| H | -6.15276600 | -0.97027500 | -2.96711600 |
| H | -6.37777900 | -2.96058700 | -1.50802100 |
| S | 2.91057000  | 1.41276600  | -1.62217200 |
| O | 2.89567900  | 2.82886400  | -1.30714400 |
| O | 3.43382400  | 0.94106400  | -2.89611200 |
| C | 3.64166100  | 0.49287600  | -0.30915000 |
| C | 3.69111400  | 1.02860300  | 0.97449400  |
| C | 4.15174100  | -0.77350900 | -0.59765500 |
| C | 4.26632000  | 0.27238400  | 1.98680400  |
| H | 3.28215200  | 2.01487300  | 1.17156300  |
| C | 4.72183800  | -1.50994400 | 0.42980900  |
| H | 4.12406800  | -1.16138000 | -1.61359400 |
| C | 4.78320800  | -1.00167700 | 1.73368100  |
| H | 4.31833500  | 0.67887300  | 2.99505000  |
| H | 5.13663100  | -2.49479900 | 0.22133400  |
| C | 5.35723900  | -1.82834200 | 2.83939400  |
| H | 5.66921200  | -1.20972900 | 3.68664700  |
| H | 4.61037200  | -2.54220000 | 3.21326200  |
| H | 6.21876500  | -2.41365000 | 2.50016100  |
| H | 0.73511100  | 0.81423600  | -3.68326700 |

|    |             |             |             |
|----|-------------|-------------|-------------|
| H  | 1.45875500  | -0.68804900 | -3.07351600 |
| O  | 0.81213200  | 1.69184500  | 0.43981500  |
| C  | 0.32066200  | -1.44300900 | 0.72958900  |
| C  | 1.17178800  | -1.86721400 | 1.66672500  |
| H  | 0.65956000  | -1.42553800 | -0.30822900 |
| H  | 0.91036500  | -1.87776700 | 2.72393900  |
| H  | 2.17543900  | -2.19430300 | 1.40116800  |
| Au | -1.86020900 | 2.41043000  | -1.81565100 |
| C  | -4.07502200 | 5.37236800  | -3.94826200 |
| C  | -2.81723600 | 5.80316900  | -4.21025200 |
| H  | -5.03903000 | 5.75713200  | -4.25016100 |
| H  | -2.45636900 | 6.64645600  | -4.78228600 |
| C  | -5.07769200 | 3.46141800  | -2.68306200 |
| H  | -4.71065400 | 2.72046100  | -1.96695100 |
| H  | -5.80127900 | 4.11412700  | -2.18755600 |
| H  | -5.56396700 | 2.94872100  | -3.51885400 |
| C  | -0.51003600 | 5.06082600  | -3.58606400 |
| H  | -0.20328800 | 5.91118200  | -2.97025600 |
| H  | -0.07052500 | 4.14510900  | -3.18005800 |
| H  | -0.15999800 | 5.20772500  | -4.61119900 |
| C  | -2.64936100 | 3.96643200  | -2.92464900 |
| N  | -1.95833100 | 4.92765000  | -3.57757900 |
| N  | -3.95137400 | 4.24645400  | -3.15889000 |

Electronic Energy (0K) = -2121.2338429

Electronic Energy (0K) + ZPE = -2120.700924

Enthalpy (298K) = -2120.662849

Free Energy (298K) = -2120.774108

## D

Number of imaginary frequencies: 0

|   |             |             |             |
|---|-------------|-------------|-------------|
| C | 0.38669800  | 3.51241800  | 2.94372400  |
| C | -0.01557800 | 2.72182300  | 1.86033600  |
| C | 0.70034700  | 1.53295800  | 1.57914400  |
| C | 1.80310300  | 1.21227700  | 2.37392100  |
| C | 2.20039800  | 2.01786500  | 3.43608200  |
| C | 1.48340500  | 3.17244100  | 3.72447200  |
| H | -0.19545700 | 4.39937700  | 3.18746400  |
| H | 2.36194100  | 0.30374500  | 2.14714100  |
| H | 3.05963500  | 1.73568400  | 4.04008700  |
| H | 1.76814200  | 3.80233000  | 4.56416200  |
| C | 0.30903500  | 0.66461600  | 0.41651600  |
| C | -1.06861200 | 0.10658100  | 0.41041200  |
| N | -1.52620000 | 0.07383500  | -0.92836900 |
| C | -0.54203500 | 0.57832100  | -1.88040100 |
| C | 0.46649700  | 1.23629200  | -0.95388400 |
| C | 1.27934000  | 2.18423700  | -1.29509800 |
| C | 2.13498600  | 3.20519500  | -1.59322200 |
| C | 1.69598300  | 4.55460200  | -1.44202900 |
| C | 3.46289400  | 2.93318300  | -2.03928300 |
| C | 2.56011200  | 5.58705600  | -1.72879300 |
| H | 0.67970600  | 4.73198800  | -1.09487900 |
| C | 4.31099800  | 3.97934900  | -2.32211200 |
| H | 3.77773700  | 1.89815300  | -2.14540300 |
| C | 3.85751000  | 5.29565100  | -2.16677800 |
| H | 2.24343100  | 6.61973400  | -1.61841200 |
| H | 5.32512800  | 3.79243300  | -2.66204100 |
| H | 4.53461700  | 6.11618100  | -2.39299400 |
| S | -2.63875500 | -1.10411400 | -1.44456300 |
| O | -2.21789500 | -2.41157000 | -0.95489200 |
| O | -2.73745400 | -0.86992400 | -2.88044800 |

|    |             |             |             |
|----|-------------|-------------|-------------|
| C  | -4.13311800 | -0.62135800 | -0.64896800 |
| C  | -4.64416300 | -1.39293200 | 0.38712000  |
| C  | -4.78237300 | 0.52711700  | -1.10201000 |
| C  | -5.84218900 | -1.00537200 | 0.97395600  |
| H  | -4.10797700 | -2.27472100 | 0.72674500  |
| C  | -5.97130100 | 0.89892600  | -0.49769700 |
| H  | -4.36449400 | 1.11080000  | -1.91946100 |
| C  | -6.51852500 | 0.13887200  | 0.54511300  |
| H  | -6.25974500 | -1.59936500 | 1.78465500  |
| H  | -6.49581700 | 1.79035800  | -0.83807900 |
| C  | -7.80241700 | 0.56344100  | 1.18383600  |
| H  | -7.68424400 | 1.52649700  | 1.69609100  |
| H  | -8.59060700 | 0.69796700  | 0.43335900  |
| H  | -8.15069600 | -0.16874400 | 1.91844800  |
| H  | -0.05580400 | -0.23005300 | -2.44514500 |
| H  | -0.98575000 | 1.28673400  | -2.58470200 |
| O  | -1.72753900 | -0.27945000 | 1.35465200  |
| C  | -1.16489700 | 3.15413500  | 1.04770200  |
| C  | -1.47120300 | 4.42907700  | 0.79111000  |
| H  | -1.82045000 | 2.38122400  | 0.64162500  |
| H  | -0.85778400 | 5.25399200  | 1.15341300  |
| H  | -2.35368000 | 4.69204500  | 0.21291600  |
| Au | 1.32784000  | -1.27815700 | 0.25798600  |
| C  | 3.38608600  | -5.00496300 | 0.47499700  |
| C  | 2.68838800  | -5.19728800 | -0.67066400 |
| H  | 4.06704500  | -5.64845600 | 1.01392900  |
| H  | 2.63645200  | -6.04432500 | -1.33987300 |
| C  | 3.61526200  | -3.14674200 | 2.13211400  |
| H  | 4.68046100  | -2.93355400 | 2.00180100  |
| H  | 3.07843700  | -2.21727100 | 2.33924600  |

|   |            |             |             |
|---|------------|-------------|-------------|
| H | 3.48216000 | -3.83406600 | 2.97178500  |
| C | 1.07485000 | -3.82640100 | -2.02453500 |
| H | 0.09913900 | -3.47503300 | -1.67485600 |
| H | 1.50532200 | -3.09081400 | -2.71131500 |
| H | 0.94399900 | -4.77297400 | -2.55237400 |
| N | 3.06846500 | -3.73813700 | 0.92325600  |
| N | 1.96363400 | -4.04337400 | -0.89224700 |
| C | 2.19414000 | -3.13943600 | 0.08588200  |

Electronic Energy (0K) = -2121.2597237

Electronic Energy (0K) + ZPE = -2120.726281

Enthalpy (298K) = -2120.687613

Free Energy (298K) = -2120.801262

## E

Number of imaginary frequencies: 0

|   |             |             |             |
|---|-------------|-------------|-------------|
| C | -2.16317100 | -3.25589400 | 2.77434200  |
| C | -1.47050000 | -2.16474800 | 2.23197000  |
| C | -0.15944300 | -2.38777300 | 1.75223500  |
| C | 0.43526600  | -3.64296400 | 1.92486400  |
| C | -0.26141100 | -4.69838100 | 2.49765700  |
| C | -1.57677700 | -4.50694400 | 2.90726800  |
| H | -3.18216300 | -3.09832000 | 3.12474100  |
| H | 1.45336800  | -3.79238400 | 1.57124100  |
| H | 0.21805100  | -5.66737700 | 2.61147100  |
| H | -2.14201800 | -5.32683400 | 3.34367800  |
| C | 0.62086000  | -1.39531200 | 1.00363600  |
| C | 1.98606600  | -0.99675000 | 1.45348000  |
| N | 2.38992700  | 0.00798100  | 0.57880600  |
| C | 1.39477000  | 0.30019200  | -0.43557400 |
| C | 0.30623000  | -0.68873600 | -0.11823300 |



|   |             |             |             |
|---|-------------|-------------|-------------|
| C | -0.97385600 | -0.62601000 | -0.77373000 |
| C | -1.64179500 | -1.82608600 | -1.14367200 |
| C | -0.97299100 | -3.07632800 | -1.20492600 |
| C | -3.03130900 | -1.78880700 | -1.42642800 |
| C | -1.67095300 | -4.23176000 | -1.49284200 |
| H | 0.10056400  | -3.11482900 | -1.03979800 |
| C | -3.72867600 | -2.95065800 | -1.69076100 |
| H | -3.54093900 | -0.82602900 | -1.39508900 |
| C | -3.04766800 | -4.17042400 | -1.72311400 |
| H | -1.15317500 | -5.18546400 | -1.54406100 |
| H | -4.79757900 | -2.91849000 | -1.88172600 |
| H | -3.59513700 | -5.08385700 | -1.94436500 |
| S | 3.91917300  | 0.76440600  | 0.61853200  |
| O | 4.12384100  | 1.27073500  | 1.96247300  |
| O | 3.87605100  | 1.66598800  | -0.52345400 |
| C | 5.04469300  | -0.55183600 | 0.29739100  |
| C | 5.63371500  | -1.22719300 | 1.36171100  |
| C | 5.31013200  | -0.89479300 | -1.02890600 |
| C | 6.51409900  | -2.26455300 | 1.08247200  |
| H | 5.40213600  | -0.94671700 | 2.38526700  |
| C | 6.18958400  | -1.93450700 | -1.28224500 |
| H | 4.84618100  | -0.34315900 | -1.84364200 |
| C | 6.80395900  | -2.63218400 | -0.23383800 |
| H | 6.98988700  | -2.79934000 | 1.90224300  |
| H | 6.41628600  | -2.21045800 | -2.31096200 |
| C | 7.75296500  | -3.74915400 | -0.53193000 |
| H | 8.58442400  | -3.40238700 | -1.15737200 |
| H | 8.17162000  | -4.17842900 | 0.38339000  |
| H | 7.25296500  | -4.55298800 | -1.08627700 |
| H | 1.01916400  | 1.33041300  | -0.34808200 |

|    |             |             |             |
|----|-------------|-------------|-------------|
| H  | 1.79720700  | 0.17238500  | -1.44955700 |
| O  | 2.63931300  | -1.46055500 | 2.36340400  |
| C  | -2.17407000 | -0.87562500 | 2.23503000  |
| C  | -1.65564900 | 0.35651400  | 2.28936800  |
| H  | -3.26263300 | -0.96779700 | 2.26188500  |
| H  | -2.31023000 | 1.22293700  | 2.35858900  |
| H  | -0.58378100 | 0.55326000  | 2.31441700  |
| Au | -1.76554800 | 1.26999500  | -0.99219500 |
| C  | -2.69461200 | 5.43384000  | -0.96325400 |
| C  | -3.66397400 | 5.01184400  | -1.81282900 |
| H  | -2.45253900 | 6.41860300  | -0.58934100 |
| H  | -4.44349600 | 5.55187500  | -2.33129100 |
| N  | -1.98530800 | 4.31285500  | -0.58544300 |
| N  | -3.51933600 | 3.64520900  | -1.93034500 |
| C  | -2.48445500 | 3.20571800  | -1.18026800 |
| C  | -0.81971800 | 4.33284700  | 0.28593500  |
| H  | -0.86291900 | 5.22075400  | 0.92015500  |
| H  | -0.82087100 | 3.44092100  | 0.91895800  |
| H  | 0.10046600  | 4.35769100  | -0.30616700 |
| C  | -4.34176600 | 2.79686900  | -2.77985800 |
| H  | -3.78391100 | 2.49715100  | -3.67197900 |
| H  | -4.65128500 | 1.90647200  | -2.22641800 |
| H  | -5.23076200 | 3.35447100  | -3.08165000 |

Electronic Energy (0K) = -2121.298672

Electronic Energy (0K) + ZPE = -2120.763179

Enthalpy (298K) = -2120.725397

Free Energy (298K) = -2120.834074

**TS<sub>F</sub>**

Number of imaginary frequencies: 1

|   |             |             |             |
|---|-------------|-------------|-------------|
| C | -1.82183800 | -3.94958400 | 3.66552800  |
| C | -1.34912000 | -2.77254900 | 3.06862600  |
| C | 0.03426300  | -2.46783500 | 3.11753500  |
| C | 0.86584200  | -3.33288000 | 3.84550300  |
| C | 0.36589400  | -4.45946500 | 4.48625100  |
| C | -0.98216900 | -4.78364000 | 4.38702500  |
| H | -2.88250700 | -4.18143300 | 3.58348400  |
| H | 1.92701200  | -3.11803300 | 3.89970600  |
| H | 1.04360500  | -5.09703700 | 5.04872400  |
| H | -1.37583600 | -5.67825900 | 4.86255200  |
| C | 0.65045700  | -1.41287500 | 2.30229600  |
| C | 2.07522600  | -0.99368700 | 2.47372900  |
| N | 2.36742300  | -0.16804800 | 1.39059800  |
| C | 1.23327100  | 0.02888900  | 0.51831100  |
| C | 0.16265300  | -0.78512800 | 1.19891500  |
| C | -1.15608000 | -0.71851600 | 0.57221000  |
| C | -1.54371600 | -1.77792400 | -0.34523300 |
| C | -0.75620900 | -2.93740100 | -0.49737200 |
| C | -2.71132500 | -1.64608800 | -1.12602600 |
| C | -1.11212800 | -3.91395100 | -1.41456000 |
| H | 0.13893700  | -3.05812700 | 0.11069200  |
| C | -3.07527300 | -2.63350400 | -2.02405200 |
| H | -3.32439400 | -0.75211400 | -1.00441800 |
| C | -2.27148700 | -3.76556900 | -2.17349100 |
| H | -0.49233500 | -4.79869000 | -1.53359900 |
| H | -3.97912500 | -2.52542300 | -2.61780600 |
| H | -2.55286200 | -4.53686100 | -2.88639300 |
| S | 3.87990100  | 0.55824300  | 1.11602800  |
| O | 4.27658200  | 1.26895300  | 2.31713800  |
| O | 3.68041500  | 1.27206500  | -0.13778600 |

|    |             |             |             |
|----|-------------|-------------|-------------|
| C  | 4.95385000  | -0.81301000 | 0.85048000  |
| C  | 5.80364300  | -1.23449600 | 1.86646300  |
| C  | 4.91643500  | -1.45331900 | -0.38898900 |
| C  | 6.64236100  | -2.31582100 | 1.62499700  |
| H  | 5.80703900  | -0.72273400 | 2.82454200  |
| C  | 5.75717700  | -2.53173900 | -0.60551200 |
| H  | 4.24738400  | -1.10179900 | -1.17191300 |
| C  | 6.63294300  | -2.97644300 | 0.39442200  |
| H  | 7.31866900  | -2.65516900 | 2.40726900  |
| H  | 5.74614400  | -3.04067200 | -1.56814000 |
| C  | 7.54098300  | -4.13524400 | 0.13054700  |
| H  | 8.23405800  | -3.90984700 | -0.68930500 |
| H  | 8.13383700  | -4.39530200 | 1.01265700  |
| H  | 6.97100100  | -5.02232800 | -0.17144900 |
| H  | 0.95691300  | 1.08902300  | 0.44639200  |
| H  | 1.42281700  | -0.33781300 | -0.50276900 |
| O  | 2.87396100  | -1.28028500 | 3.34247300  |
| C  | -2.36823900 | -1.93220800 | 2.46379900  |
| C  | -2.44230700 | -0.57794400 | 2.48489700  |
| H  | -3.20029800 | -2.47100000 | 2.00410900  |
| H  | -3.34853200 | -0.08383300 | 2.14375900  |
| H  | -1.72190500 | 0.03261100  | 3.02491800  |
| Au | -1.82992700 | 1.25515700  | 0.21353700  |
| C  | -2.29068700 | 5.41672900  | -0.56014300 |
| C  | -3.41169400 | 4.95903700  | -1.17017300 |
| H  | -1.89291500 | 6.41599800  | -0.45360100 |
| H  | -4.19705900 | 5.47685800  | -1.70213800 |
| N  | -1.65631900 | 4.31609600  | -0.02100600 |
| N  | -3.43062800 | 3.59119700  | -0.98856900 |
| C  | -2.35098000 | 3.18765300  | -0.28355000 |

|   |             |            |             |
|---|-------------|------------|-------------|
| C | -0.38108100 | 4.36289400 | 0.67813100  |
| H | -0.23906800 | 5.36351300 | 1.09195400  |
| H | -0.38558900 | 3.63814900 | 1.49575400  |
| H | 0.44086600  | 4.13656600 | -0.00817600 |
| C | -4.45446700 | 2.70068700 | -1.51279900 |
| H | -4.04912200 | 2.09276800 | -2.32733300 |
| H | -4.82579100 | 2.04811800 | -0.71801800 |
| H | -5.28258800 | 3.30246400 | -1.89254100 |

Electronic Energy (0K) = -2121.2870888

Electronic Energy (0K) + ZPE = -2120.752906

Enthalpy (298K) = -2120.715454

Free Energy (298K) = -2120.825255

## F

Number of imaginary frequencies: 0

|   |             |             |             |
|---|-------------|-------------|-------------|
| C | -1.25369100 | -3.89391300 | 3.44024800  |
| C | -1.32609400 | -2.76445400 | 2.54395000  |
| C | -0.28171300 | -1.74296200 | 2.62650400  |
| C | 0.54210300  | -1.75792800 | 3.80016000  |
| C | 0.48173700  | -2.79145600 | 4.68673500  |
| C | -0.39556200 | -3.90099000 | 4.48976400  |
| H | -1.97530500 | -4.69591200 | 3.29515600  |
| H | 1.26097400  | -0.95732800 | 3.93566600  |
| H | 1.14031600  | -2.78685200 | 5.55247600  |
| H | -0.38630800 | -4.72877300 | 5.19365100  |
| C | 0.04207800  | -0.93570200 | 1.52982500  |
| C | 1.30287800  | -0.16211900 | 1.42935400  |
| N | 1.56179900  | -0.02702200 | 0.05527200  |
| C | 0.66006200  | -0.84052900 | -0.76224000 |
| C | -0.50318600 | -1.01870100 | 0.19480900  |

|   |             |             |             |
|---|-------------|-------------|-------------|
| C | -1.82773300 | -1.30223100 | -0.13665500 |
| C | -2.26192800 | -1.74816600 | -1.48182200 |
| C | -1.46732400 | -2.59311500 | -2.26567700 |
| C | -3.50231400 | -1.33095500 | -1.99087300 |
| C | -1.88895200 | -2.99244000 | -3.52920300 |
| H | -0.52538300 | -2.97067700 | -1.87444200 |
| C | -3.92006500 | -1.72738700 | -3.25337500 |
| H | -4.13894600 | -0.67868600 | -1.39333100 |
| C | -3.11202600 | -2.55677200 | -4.02839800 |
| H | -1.26168600 | -3.65396100 | -4.12181000 |
| H | -4.87975000 | -1.38772900 | -3.63562300 |
| H | -3.44114800 | -2.87003900 | -5.01626000 |
| S | 2.98660900  | 0.64842800  | -0.57403300 |
| O | 3.20245300  | 1.91111800  | 0.10839800  |
| O | 2.77511000  | 0.60619100  | -2.01471900 |
| C | 4.26142400  | -0.48869200 | -0.13892000 |
| C | 4.93538300  | -0.33726400 | 1.07040800  |
| C | 4.55426300  | -1.53276000 | -1.01620300 |
| C | 5.92537100  | -1.25421900 | 1.39636800  |
| H | 4.68769400  | 0.48248000  | 1.73830900  |
| C | 5.54664700  | -2.43611900 | -0.66828600 |
| H | 4.02665900  | -1.61853700 | -1.96317700 |
| C | 6.24652800  | -2.30973700 | 0.53776800  |
| H | 6.46491000  | -1.14831600 | 2.33574500  |
| H | 5.79327900  | -3.25303500 | -1.34447100 |
| C | 7.33766300  | -3.27301800 | 0.88125600  |
| H | 7.06113500  | -4.30122600 | 0.62253800  |
| H | 8.25165000  | -3.03706800 | 0.32099600  |
| H | 7.58630200  | -3.23824400 | 1.94662900  |
| H | 0.40309600  | -0.33990800 | -1.70043300 |

|    |             |             |             |
|----|-------------|-------------|-------------|
| H  | 1.13044900  | -1.80951400 | -0.99272900 |
| O  | 2.01941700  | 0.28628700  | 2.30276400  |
| C  | -2.42609900 | -2.66683900 | 1.73580700  |
| C  | -2.80029300 | -1.41975500 | 1.03296500  |
| H  | -3.07780200 | -3.53592700 | 1.64558800  |
| H  | -3.83337100 | -1.45232400 | 0.67990900  |
| H  | -2.69222500 | -0.56301400 | 1.71213100  |
| Au | -1.59568500 | 1.07340500  | -0.27551100 |
| C  | -1.28395500 | 5.23486200  | -0.86545400 |
| C  | -2.63066700 | 5.12222900  | -0.97549900 |
| H  | -0.63127600 | 6.09382500  | -0.93199000 |
| H  | -3.39799900 | 5.86140500  | -1.15613000 |
| N  | -0.79670200 | 3.96831200  | -0.61698300 |
| N  | -2.93373200 | 3.78733600  | -0.79357100 |
| C  | -1.80873800 | 3.07721800  | -0.57530800 |
| C  | 0.61139600  | 3.62698900  | -0.45489000 |
| H  | 1.17998100  | 4.54207400  | -0.27865300 |
| H  | 0.73473300  | 2.96332500  | 0.40515900  |
| H  | 0.99069700  | 3.13342000  | -1.35537500 |
| C  | -4.28012200 | 3.24330700  | -0.83900100 |
| H  | -4.70053600 | 3.36243100  | -1.84152000 |
| H  | -4.23273800 | 2.18031000  | -0.58735300 |
| H  | -4.91403900 | 3.75969300  | -0.11318300 |

Electronic Energy (0K) = -2121.3379493

Electronic Energy (0K) + ZPE = -2120.799270

Enthalpy (298K) = -2120.762688

Free Energy (298K) = -2120.868336

**TS<sub>G</sub>**

Number of imaginary frequencies: 1

|   |             |             |             |
|---|-------------|-------------|-------------|
| C | -1.30896700 | -3.87694400 | 3.26219400  |
| C | -1.30477400 | -2.84629700 | 2.27038500  |
| C | -0.28892200 | -1.81872200 | 2.35400400  |
| C | 0.46481200  | -1.72549200 | 3.56074800  |
| C | 0.33544200  | -2.66976900 | 4.54272300  |
| C | -0.53201700 | -3.77978100 | 4.37976400  |
| H | -2.02138700 | -4.69164900 | 3.14533800  |
| H | 1.18688100  | -0.92214400 | 3.65977700  |
| H | 0.93352600  | -2.58806200 | 5.44714700  |
| H | -0.59160200 | -4.53902500 | 5.15539400  |
| C | 0.12622800  | -1.15175200 | 1.17691200  |
| C | 1.47070400  | -0.52573300 | 1.02232800  |
| N | 1.76481400  | -0.58895300 | -0.34352300 |
| C | 0.75475200  | -1.30229300 | -1.12437100 |
| C | -0.39998400 | -1.35774800 | -0.13925500 |
| C | -1.70667400 | -1.76670700 | -0.44854300 |
| C | -2.07867300 | -2.26905100 | -1.78341400 |
| C | -1.36061000 | -3.29712600 | -2.40497600 |
| C | -3.16954800 | -1.69951500 | -2.45505900 |
| C | -1.71932700 | -3.73932800 | -3.67263100 |
| H | -0.53630000 | -3.77264400 | -1.87632400 |
| C | -3.51584600 | -2.13089700 | -3.72867200 |
| H | -3.73399700 | -0.89917200 | -1.97619700 |
| C | -2.79180000 | -3.15287400 | -4.33876600 |
| H | -1.16269600 | -4.54720000 | -4.14120000 |
| H | -4.35377000 | -1.67033000 | -4.24648800 |
| H | -3.06828700 | -3.49561300 | -5.33297500 |
| S | 3.14751100  | 0.10914100  | -1.04410000 |
| O | 3.27115600  | 1.45846200  | -0.52049000 |
| O | 2.96286900  | -0.12265500 | -2.46945400 |



|    |             |             |             |
|----|-------------|-------------|-------------|
| C  | 4.48376200  | -0.87913000 | -0.45892400 |
| C  | 5.19204200  | -0.48201700 | 0.67228000  |
| C  | 4.79699400  | -2.04963300 | -1.14808200 |
| C  | 6.23808700  | -1.28028200 | 1.11309500  |
| H  | 4.93022100  | 0.43672700  | 1.18945000  |
| C  | 5.84475200  | -2.83216800 | -0.68730800 |
| H  | 4.24199200  | -2.32786000 | -2.04146200 |
| C  | 6.57665600  | -2.46268500 | 0.44706700  |
| H  | 6.80915400  | -0.98069400 | 1.99005000  |
| H  | 6.11043800  | -3.74304300 | -1.22097600 |
| C  | 7.68821000  | -3.32974600 | 0.94670700  |
| H  | 7.30761200  | -4.07507500 | 1.65736500  |
| H  | 8.16890400  | -3.87730200 | 0.12927100  |
| H  | 8.45259000  | -2.74525300 | 1.46898900  |
| H  | 0.51343500  | -0.77644600 | -2.05344200 |
| H  | 1.11920900  | -2.30820200 | -1.37694300 |
| O  | 2.20896500  | -0.05521500 | 1.86431300  |
| C  | -2.31990500 | -2.86216300 | 1.32021800  |
| C  | -2.76271600 | -1.65020800 | 0.61032000  |
| H  | -2.86430500 | -3.79144900 | 1.15391300  |
| H  | -3.76883400 | -1.74535000 | 0.19783600  |
| H  | -2.69117200 | -0.74407900 | 1.22564400  |
| Au | -1.03054200 | 0.92147400  | -0.12581800 |
| C  | -1.16704600 | 5.12171900  | -0.47977000 |
| C  | -2.49173300 | 4.86298900  | -0.60647700 |
| H  | -0.61609300 | 6.05137700  | -0.49531700 |
| H  | -3.33787400 | 5.52032900  | -0.74769500 |
| N  | -0.53754200 | 3.90620500  | -0.30523500 |
| N  | -2.63999400 | 3.49338100  | -0.51243100 |
| C  | -1.44045000 | 2.90444500  | -0.32773100 |

|   |             |            |             |
|---|-------------|------------|-------------|
| C | 0.90241900  | 3.72669400 | -0.18314900 |
| H | 1.33152100  | 4.60033600 | 0.31203400  |
| H | 1.10502900  | 2.83619100 | 0.41726100  |
| H | 1.35740000  | 3.60341400 | -1.17016400 |
| C | -3.91949800 | 2.80771900 | -0.57163300 |
| H | -4.45553600 | 3.10223400 | -1.47776600 |
| H | -3.73733100 | 1.72948600 | -0.59372400 |
| H | -4.52223700 | 3.05707300 | 0.30645900  |

Electronic Energy (0K) = -2121.3330851

Electronic Energy (0K) + ZPE = -2120.795459

Enthalpy (298K) = -2120.759202

Free Energy (298K) = -2120.864659

## 2a

Number of imaginary frequencies: 0

|   |             |             |             |
|---|-------------|-------------|-------------|
| C | -2.15366500 | -3.33346900 | 3.38623200  |
| C | -1.68955200 | -2.52552500 | 2.34855500  |
| C | -0.51449300 | -1.76742100 | 2.54295600  |
| C | 0.12854400  | -1.79307200 | 3.78635200  |
| C | -0.37058200 | -2.57547800 | 4.81907300  |
| C | -1.50645300 | -3.35614600 | 4.61667400  |
| H | -3.04802900 | -3.93480700 | 3.22721800  |
| H | 1.03167600  | -1.20399700 | 3.92195600  |
| H | 0.13516300  | -2.58556800 | 5.78195700  |
| H | -1.89312000 | -3.97933000 | 5.42009200  |
| C | 0.03331700  | -1.07488900 | 1.38679200  |
| C | 1.30862800  | -0.34146300 | 1.30913100  |
| N | 1.44296800  | 0.02558400  | -0.04182300 |
| C | 0.35512500  | -0.48537100 | -0.86716100 |
| C | -0.51276700 | -1.14187200 | 0.15082200  |

|   |             |             |             |
|---|-------------|-------------|-------------|
| C | -1.80521400 | -1.76552000 | -0.14538500 |
| C | -1.97578400 | -2.34505900 | -1.51397700 |
| C | -1.40919900 | -3.58601100 | -1.81884600 |
| C | -2.64251300 | -1.63774600 | -2.51537900 |
| C | -1.51809200 | -4.11489000 | -3.10019900 |
| H | -0.88526800 | -4.13633800 | -1.03725700 |
| C | -2.74995600 | -2.16461700 | -3.79920500 |
| H | -3.07973400 | -0.66721500 | -2.28238400 |
| C | -2.18928500 | -3.40433500 | -4.09272200 |
| H | -1.07943700 | -5.08465800 | -3.32532300 |
| H | -3.27278700 | -1.60578600 | -4.57232000 |
| H | -2.27633100 | -3.81824300 | -5.09493700 |
| S | 2.81215400  | 0.77898900  | -0.68609600 |
| O | 3.06643600  | 1.99729400  | 0.06203500  |
| O | 2.53956500  | 0.83095000  | -2.11636900 |
| C | 4.11735900  | -0.37261400 | -0.38711100 |
| C | 4.97127700  | -0.18798900 | 0.69449000  |
| C | 4.25459900  | -1.46010500 | -1.24934700 |
| C | 5.98458600  | -1.11417500 | 0.90879200  |
| H | 4.84213200  | 0.66529700  | 1.35364500  |
| C | 5.26919100  | -2.37435900 | -1.01459600 |
| H | 3.58265900  | -1.57753800 | -2.09694900 |
| C | 6.14791600  | -2.21474300 | 0.06443600  |
| H | 6.66321100  | -0.98272000 | 1.74963200  |
| H | 5.39076800  | -3.22748600 | -1.68031100 |
| C | 7.24989200  | -3.20200900 | 0.28770000  |
| H | 6.88253400  | -4.23190200 | 0.21087800  |
| H | 8.03611500  | -3.08670200 | -0.46944900 |
| H | 7.71385900  | -3.07453600 | 1.27088100  |
| H | -0.16451800 | 0.32304100  | -1.39976500 |

|   |             |             |             |
|---|-------------|-------------|-------------|
| H | 0.71819800  | -1.19919500 | -1.62115700 |
| O | 2.12364700  | -0.08906700 | 2.17569500  |
| C | -2.43254900 | -2.47074100 | 1.06968700  |
| C | -2.99734000 | -1.17920800 | 0.56563300  |
| H | -3.02076000 | -3.35785300 | 0.83345600  |
| H | -3.94646000 | -1.23280900 | 0.03737300  |
| H | -2.84047100 | -0.28362800 | 1.16285400  |

Electronic Energy (0K) = -1681.0820912

Electronic Energy (0K) + ZPE = -1680.674455

Enthalpy (298K) = -1680.647984

Free Energy (298K) = -1680.731092

(+)-**2a**: HPLC (IC, *n*-hexane/2-propanol = 70/30, flow rate = 1.0 mL/min, I = 254 nm)

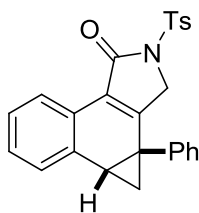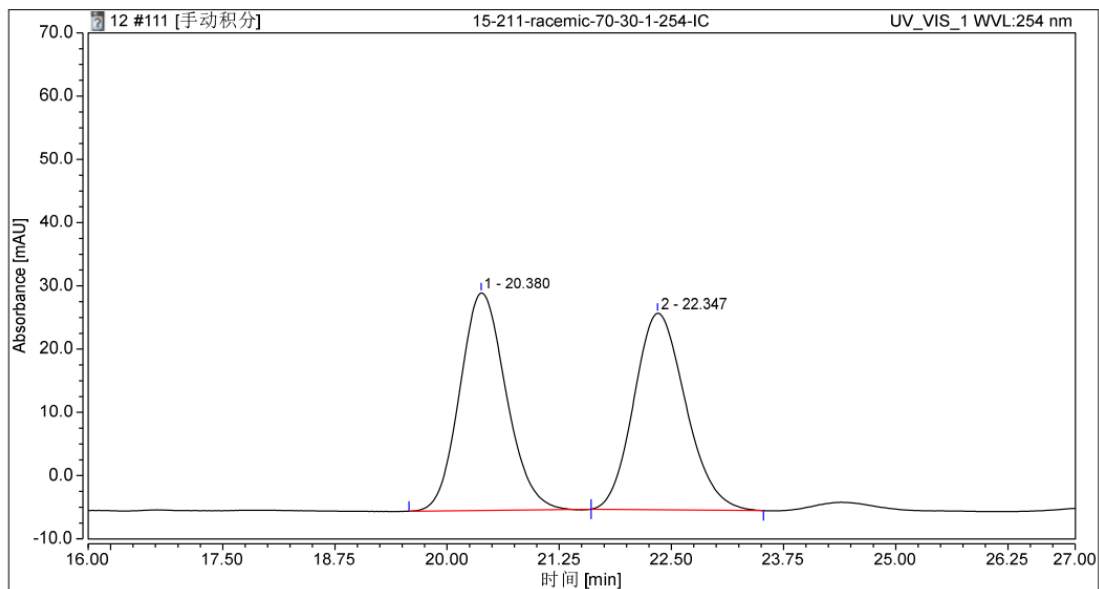

| Integration Results |           |                       |                 |               |                    |                      |                |
|---------------------|-----------|-----------------------|-----------------|---------------|--------------------|----------------------|----------------|
| No.                 | Peak Name | Retention Time<br>min | Area<br>mAU*min | Height<br>mAU | Relative Area<br>% | Relative Height<br>% | Amount<br>n.a. |
| 1                   |           | 20.380                | 20.569          | 34.411        | 49.79              | 52.55                | n.a.           |
| 2                   |           | 22.347                | 20.744          | 31.069        | 50.21              | 47.45                | n.a.           |
| <b>Total:</b>       |           |                       | <b>41.313</b>   | <b>65.480</b> | <b>100.00</b>      | <b>100.00</b>        |                |

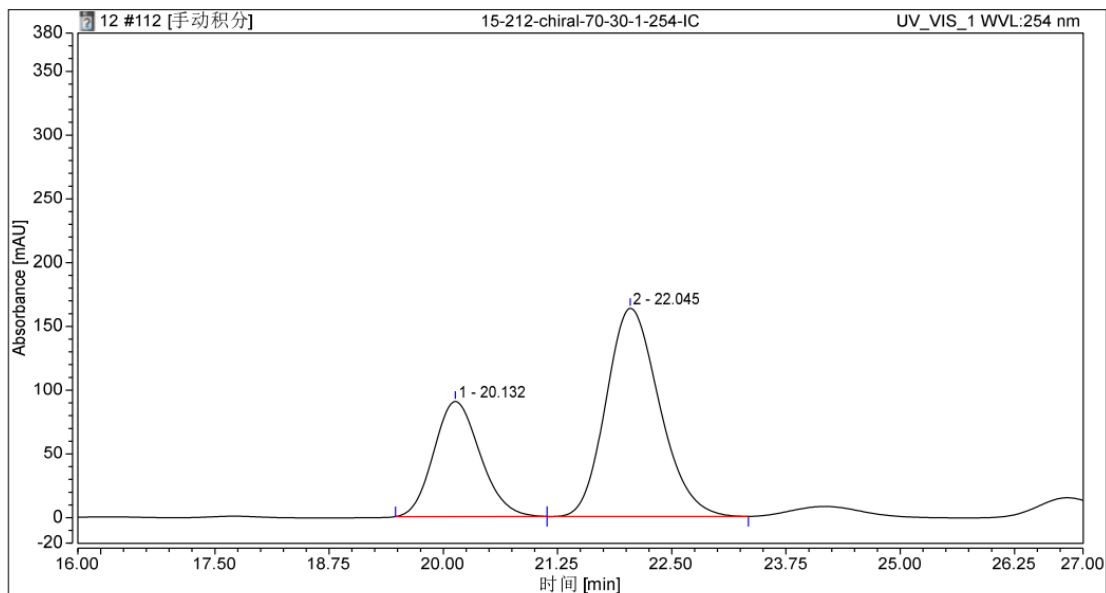

| Integration Results |           |                       |                 |                |                    |                      |                |
|---------------------|-----------|-----------------------|-----------------|----------------|--------------------|----------------------|----------------|
| No.                 | Peak Name | Retention Time<br>min | Area<br>mAU*min | Height<br>mAU  | Relative Area<br>% | Relative Height<br>% | Amount<br>n.a. |
| 1                   |           | 20.132                | 53.204          | 90.240         | 32.48              | 35.60                | n.a.           |
| 2                   |           | 22.045                | 110.579         | 163.223        | 67.52              | 64.40                | n.a.           |
| <b>Total:</b>       |           |                       | <b>163.783</b>  | <b>253.462</b> | <b>100.00</b>      | <b>100.00</b>        |                |

(+)-**2b**: HPLC (IC, *n*-hexane/2-propanol = 70/30, flow rate = 1.0 mL/min, I = 254 nm)

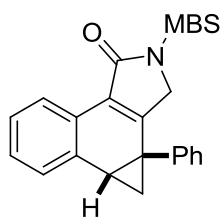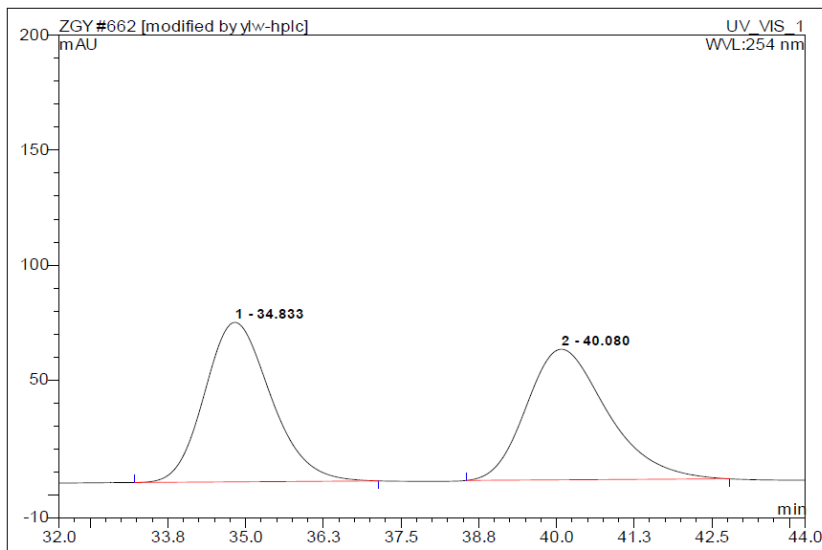

| No.           | Ret.Time<br>min | Peak Name | Height<br>mAU | Area<br>mAU*min | Rel.Area<br>% | Amount<br>n.a. | Type |
|---------------|-----------------|-----------|---------------|-----------------|---------------|----------------|------|
| 1             | 34.83           | n.a.      | 69.408        | 85.781          | 50.00         | n.a.           | BMB* |
| 2             | 40.08           | n.a.      | 56.844        | 85.767          | 50.00         | n.a.           | BMB* |
| <b>Total:</b> |                 |           | 126.252       | 171.547         | 100.00        | 0.000          |      |

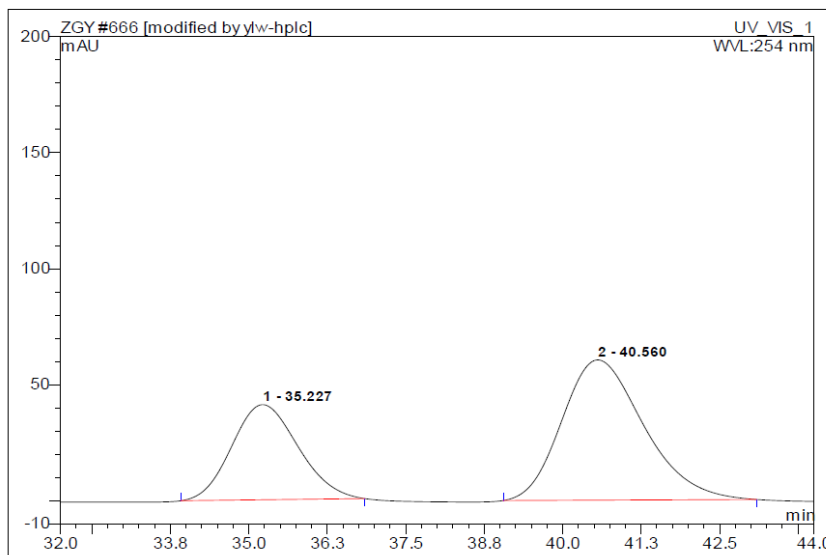

| No.           | Ret.Time<br>min | Peak Name | Height<br>mAU | Area<br>mAU*min | Rel.Area<br>% | Amount<br>n.a. | Type |
|---------------|-----------------|-----------|---------------|-----------------|---------------|----------------|------|
| 1             | 35.23           | n.a.      | 41.002        | 50.224          | 35.48         | n.a.           | BMB* |
| 2             | 40.56           | n.a.      | 60.447        | 91.335          | 64.52         | n.a.           | BMB* |
| <b>Total:</b> |                 |           | 101.449       | 141.559         | 100.00        | 0.000          |      |

(+)-**2c**: HPLC (IC, *n*-hexane/2-propanol = 80/20, flow rate = 1.0 mL/min, I = 254 nm)

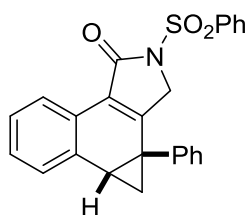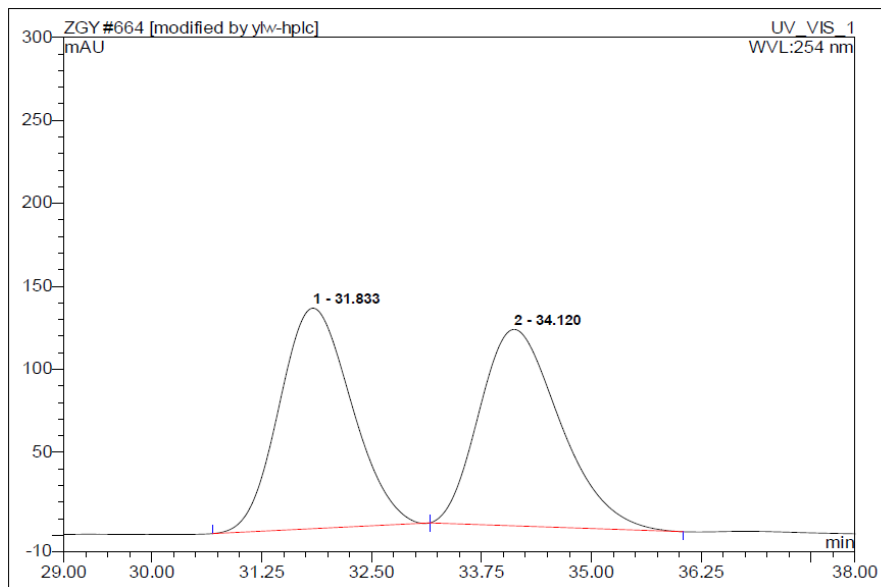

| No.           | Ret.Time<br>min | Peak Name | Height<br>mAU | Area<br>mAU*min | Rel.Area<br>% | Amount<br>n.a. | Type |
|---------------|-----------------|-----------|---------------|-----------------|---------------|----------------|------|
| 1             | 31.83           | n.a.      | 132.891       | 126.242         | 50.05         | n.a.           | BMB* |
| 2             | 34.12           | n.a.      | 118.379       | 126.011         | 49.95         | n.a.           | bMB* |
| <b>Total:</b> |                 |           | 251.270       | 252.253         | 100.00        | 0.000          |      |

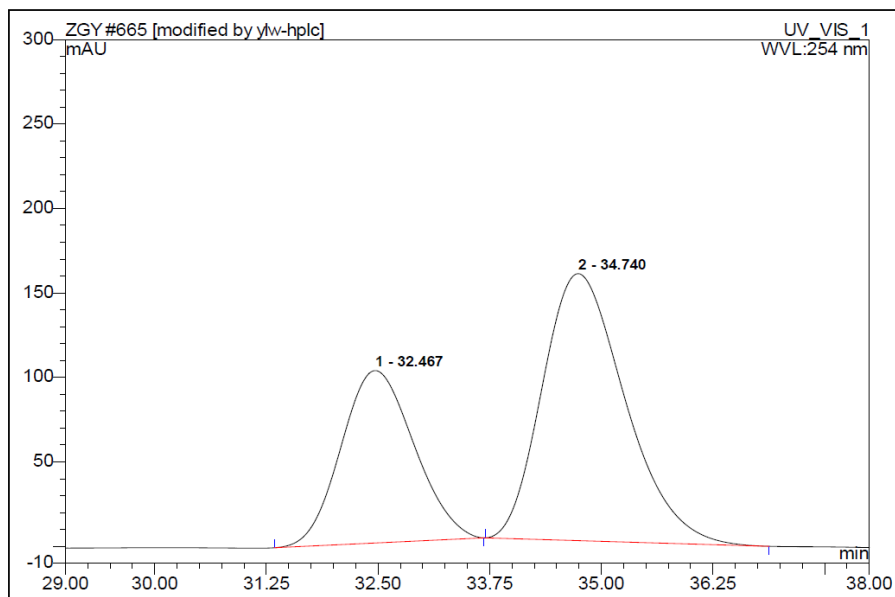

| No.           | Ret.Time<br>min | Peak Name | Height<br>mAU | Area<br>mAU*min | Rel.Area<br>% | Amount<br>n.a. | Type |
|---------------|-----------------|-----------|---------------|-----------------|---------------|----------------|------|
| 1             | 32.47           | n.a.      | 102.038       | 96.417          | 36.29         | n.a.           | BMB* |
| 2             | 34.74           | n.a.      | 158.016       | 169.274         | 63.71         | n.a.           | BMB* |
| <b>Total:</b> |                 |           | 260.054       | 265.691         | 100.00        | 0.000          |      |

7.924  
7.903  
7.536  
7.517  
7.399  
7.397  
7.380  
7.377  
7.284  
7.269  
7.249  
7.233  
7.216  
7.212  
7.186  
7.182  
7.166  
7.149  
7.145  
7.138  
5.746  
5.743  
5.702  
5.700

5.126  
5.123  
5.098  
5.096

4.575

2.328

| Parameter                | Value               |
|--------------------------|---------------------|
| 1 Title                  | hfl-2-211-H         |
| 2 Origin                 | Bruker BioSpin GmbH |
| 3 Solvent                | CDC13               |
| 4 Temperature            | 296.0               |
| 5 Number of Scans        | 5                   |
| 6 Acquisition Time       | 3.9846              |
| 7 Acquisition Date       | 2017-12-08T10:59:34 |
| 8 Spectrometer Frequency | 400.13              |
| 9 Spectral Width         | 8223.7              |

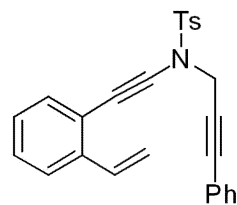

1a

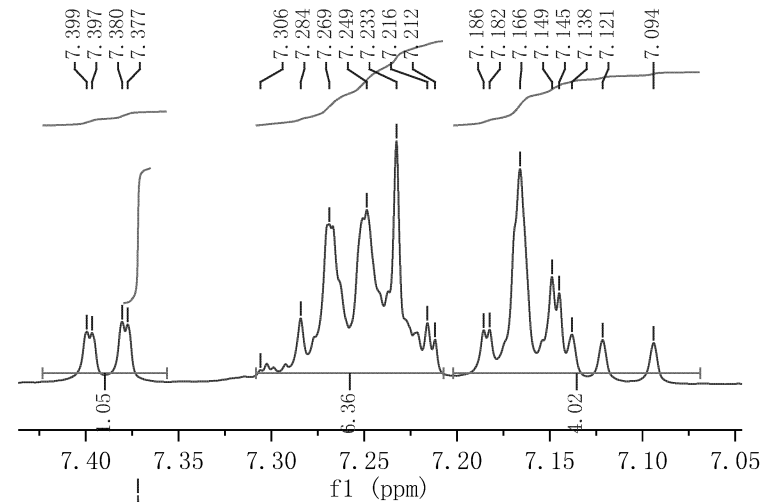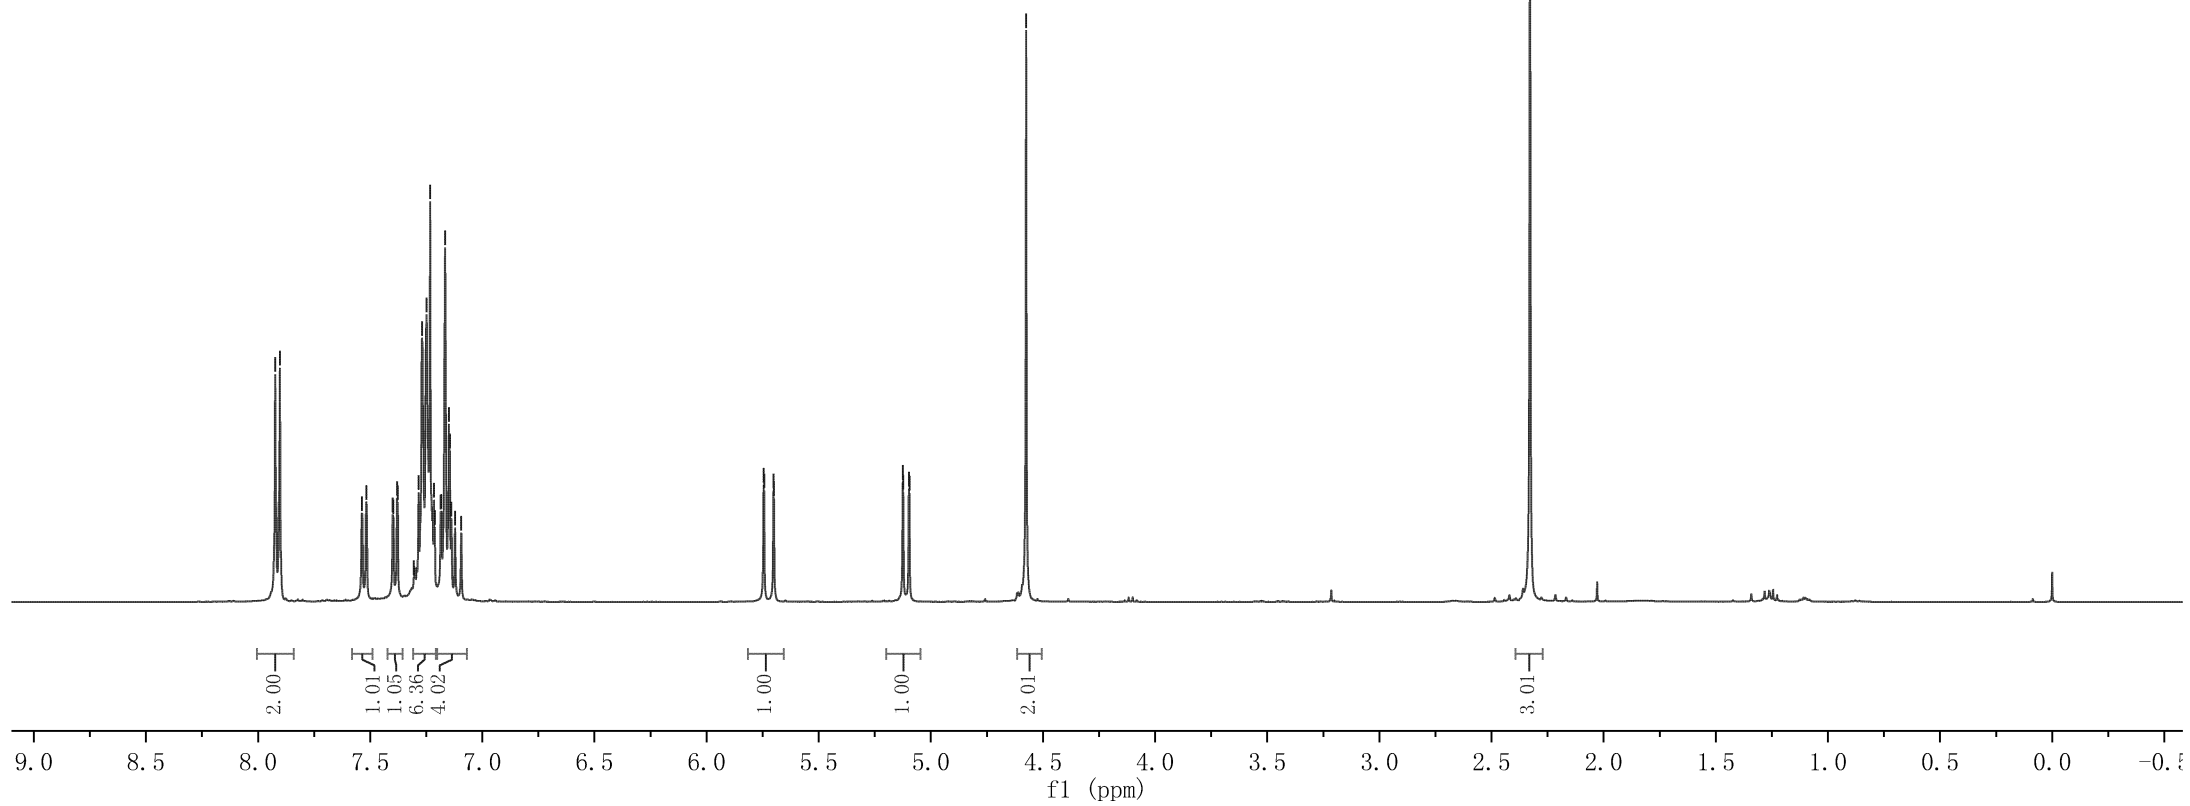



144.89  
138.89  
134.84  
132.32  
131.61  
129.58  
128.58  
128.22  
128.07  
127.35  
124.44  
121.88  
115.30

86.54  
86.27  
81.12  
77.32  
77.00  
76.68  
69.61

42.85  
21.48

| Parameter                | Value               |
|--------------------------|---------------------|
| 1 Title                  | hf1-2-211-C         |
| 2 Origin                 | Bruker BioSpin GmbH |
| 3 Solvent                | CDC13               |
| 4 Temperature            | 296.0               |
| 5 Number of Scans        | 26                  |
| 6 Acquisition Time       | 1.3631              |
| 7 Acquisition Date       | 2017-12-08T11:02:33 |
| 8 Spectrometer Frequency | 100.61              |
| 9 Spectral Width         | 24038.5             |

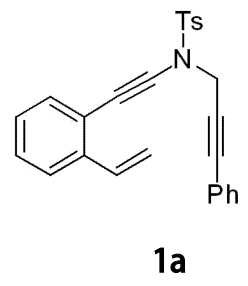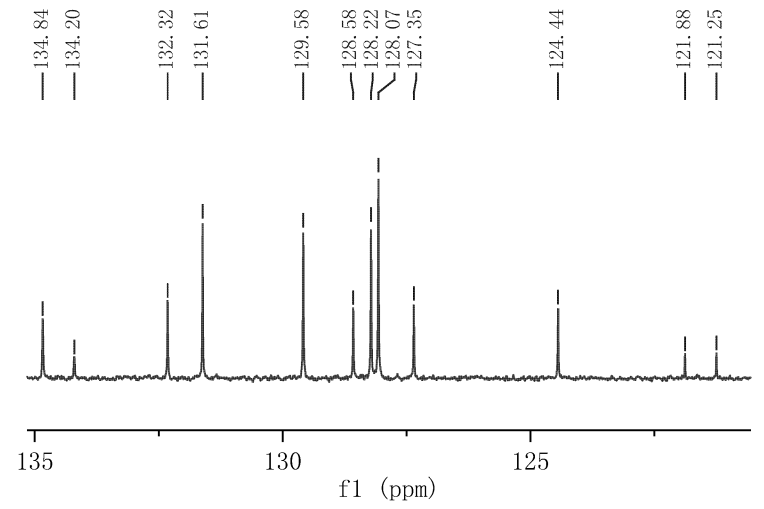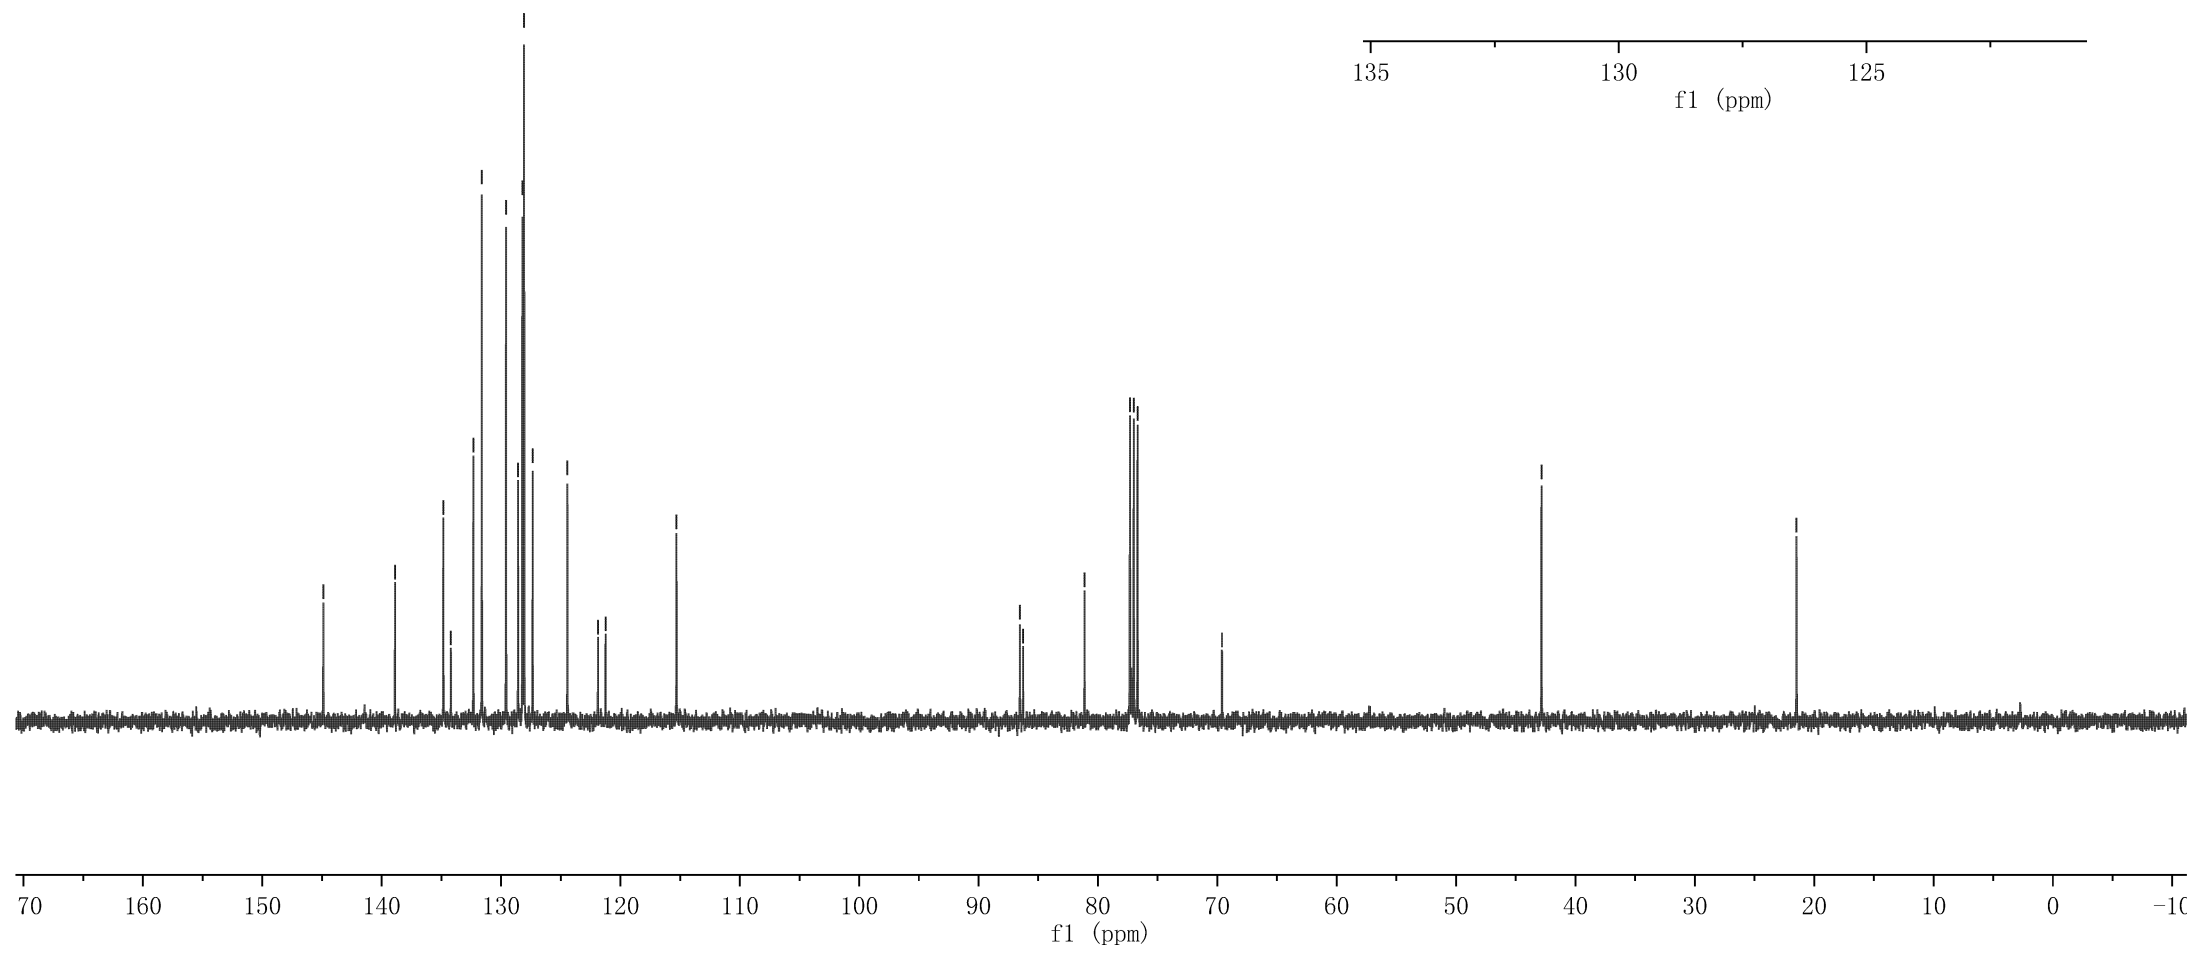

7.952  
7.930  
7.373  
7.370  
7.244  
7.230  
7.211  
7.200  
7.178  
7.157  
7.138  
6.885  
6.862

5.742  
5.740  
5.698  
5.696  
5.127  
5.124  
5.099  
5.097  
4.552

3.679

| Parameter                | Value               |
|--------------------------|---------------------|
| 1 Title                  | HFL-3-242-H         |
| 2 Origin                 | Bruker BioSpin GmbH |
| 3 Solvent                | CDC13               |
| 4 Temperature            | 296.1               |
| 5 Number of Scans        | 4                   |
| 6 Acquisition Time       | 3.9846              |
| 7 Acquisition Date       | 2018-03-13T11:09:04 |
| 8 Spectrometer Frequency | 400.03              |
| 9 Spectral Width         | 8223.7              |

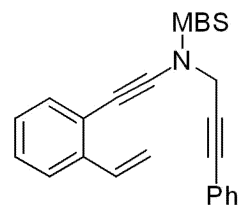

**1b**

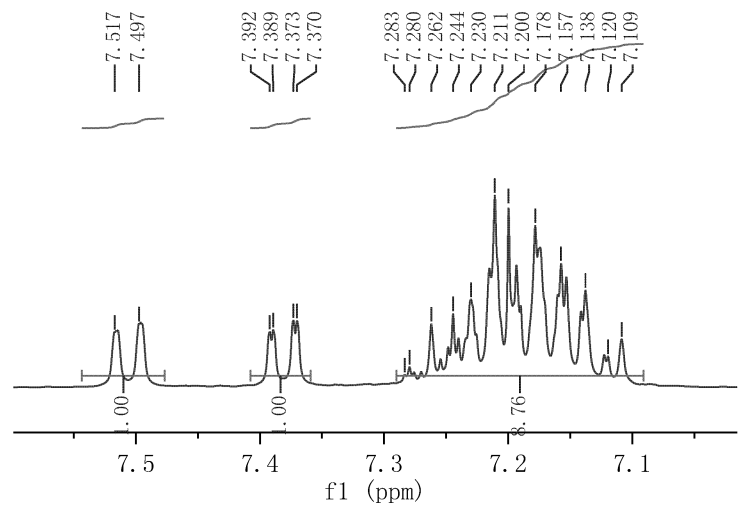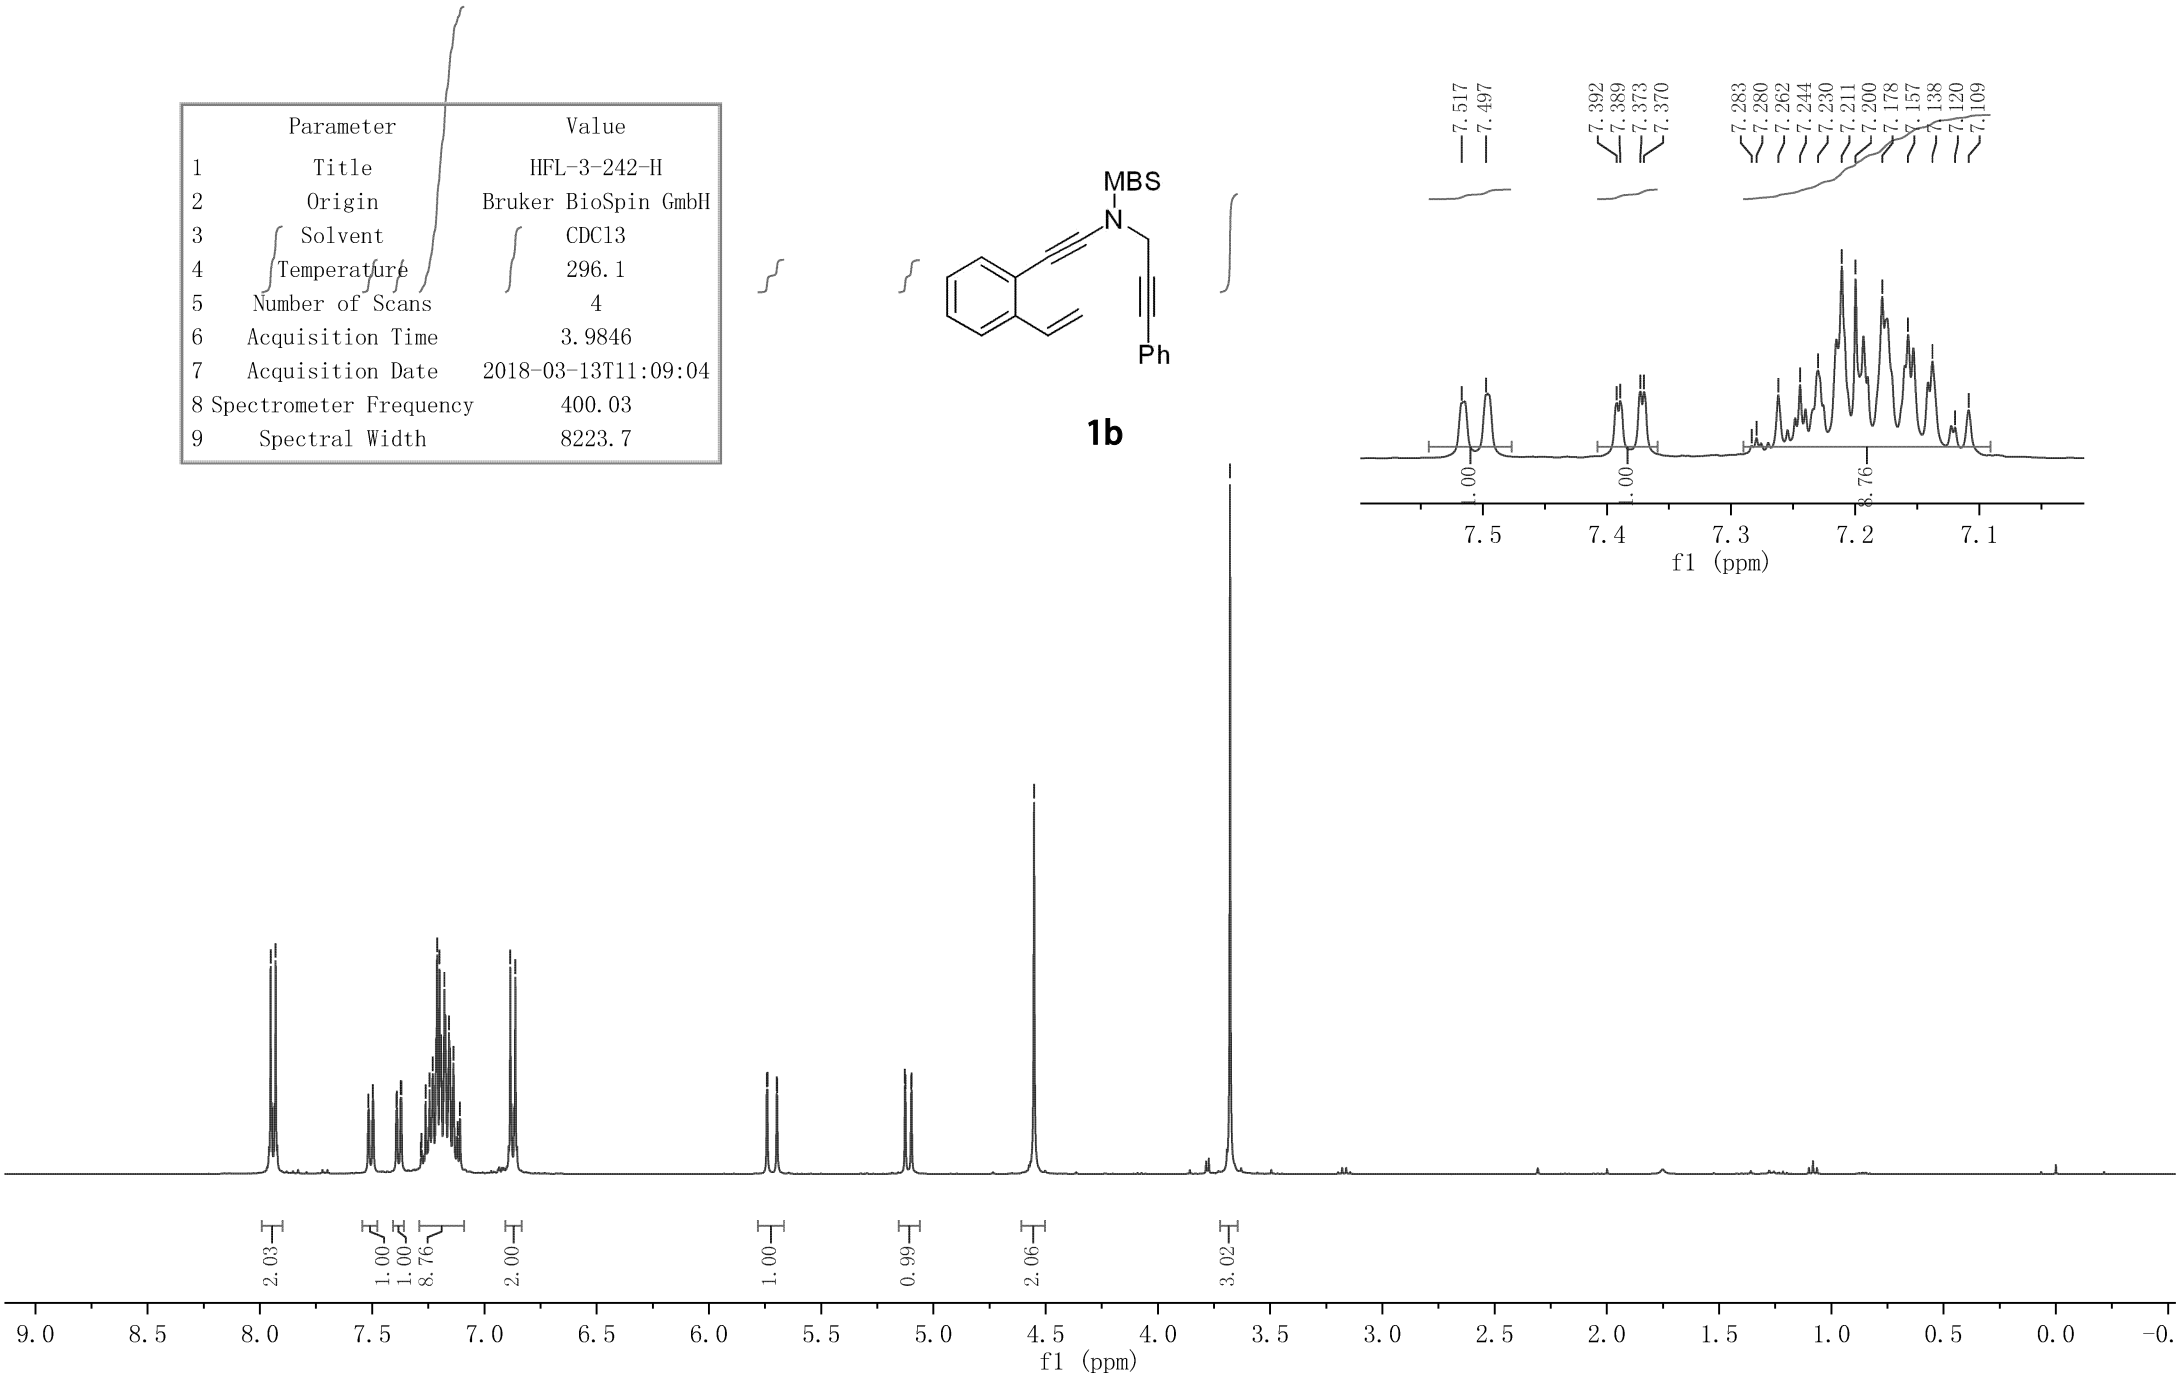

163.71

138.67  
134.63  
132.15  
131.48  
130.29  
128.49  
128.29  
127.99  
127.28  
124.31  
121.97  
115.24  
114.02

86.41  
86.38  
81.15  
77.32  
77.00  
76.68

69.43

55.36

42.64

| Parameter                | Value               |
|--------------------------|---------------------|
| 1 Title                  | HFL-3-242-C         |
| 2 Origin                 | Bruker BioSpin GmbH |
| 3 Solvent                | CDC13               |
| 4 Temperature            | 296.1               |
| 5 Number of Scans        | 8                   |
| 6 Acquisition Time       | 1.3631              |
| 7 Acquisition Date       | 2018-03-13T11:11:10 |
| 8 Spectrometer Frequency | 100.59              |
| 9 Spectral Width         | 24038.5             |

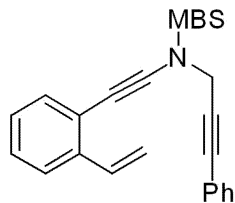

**1b**

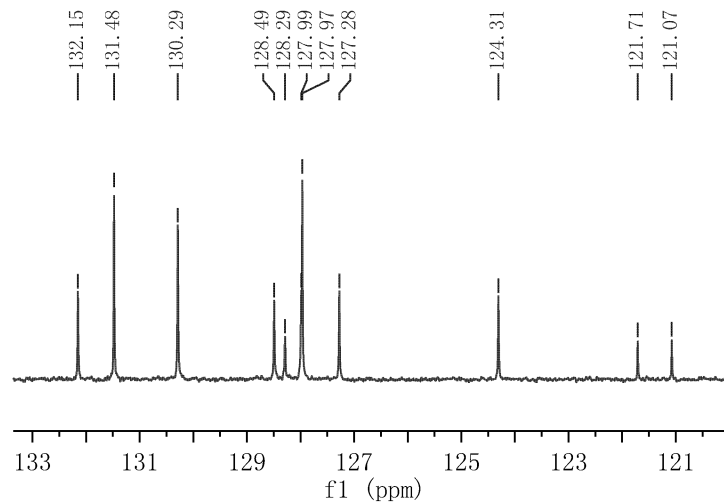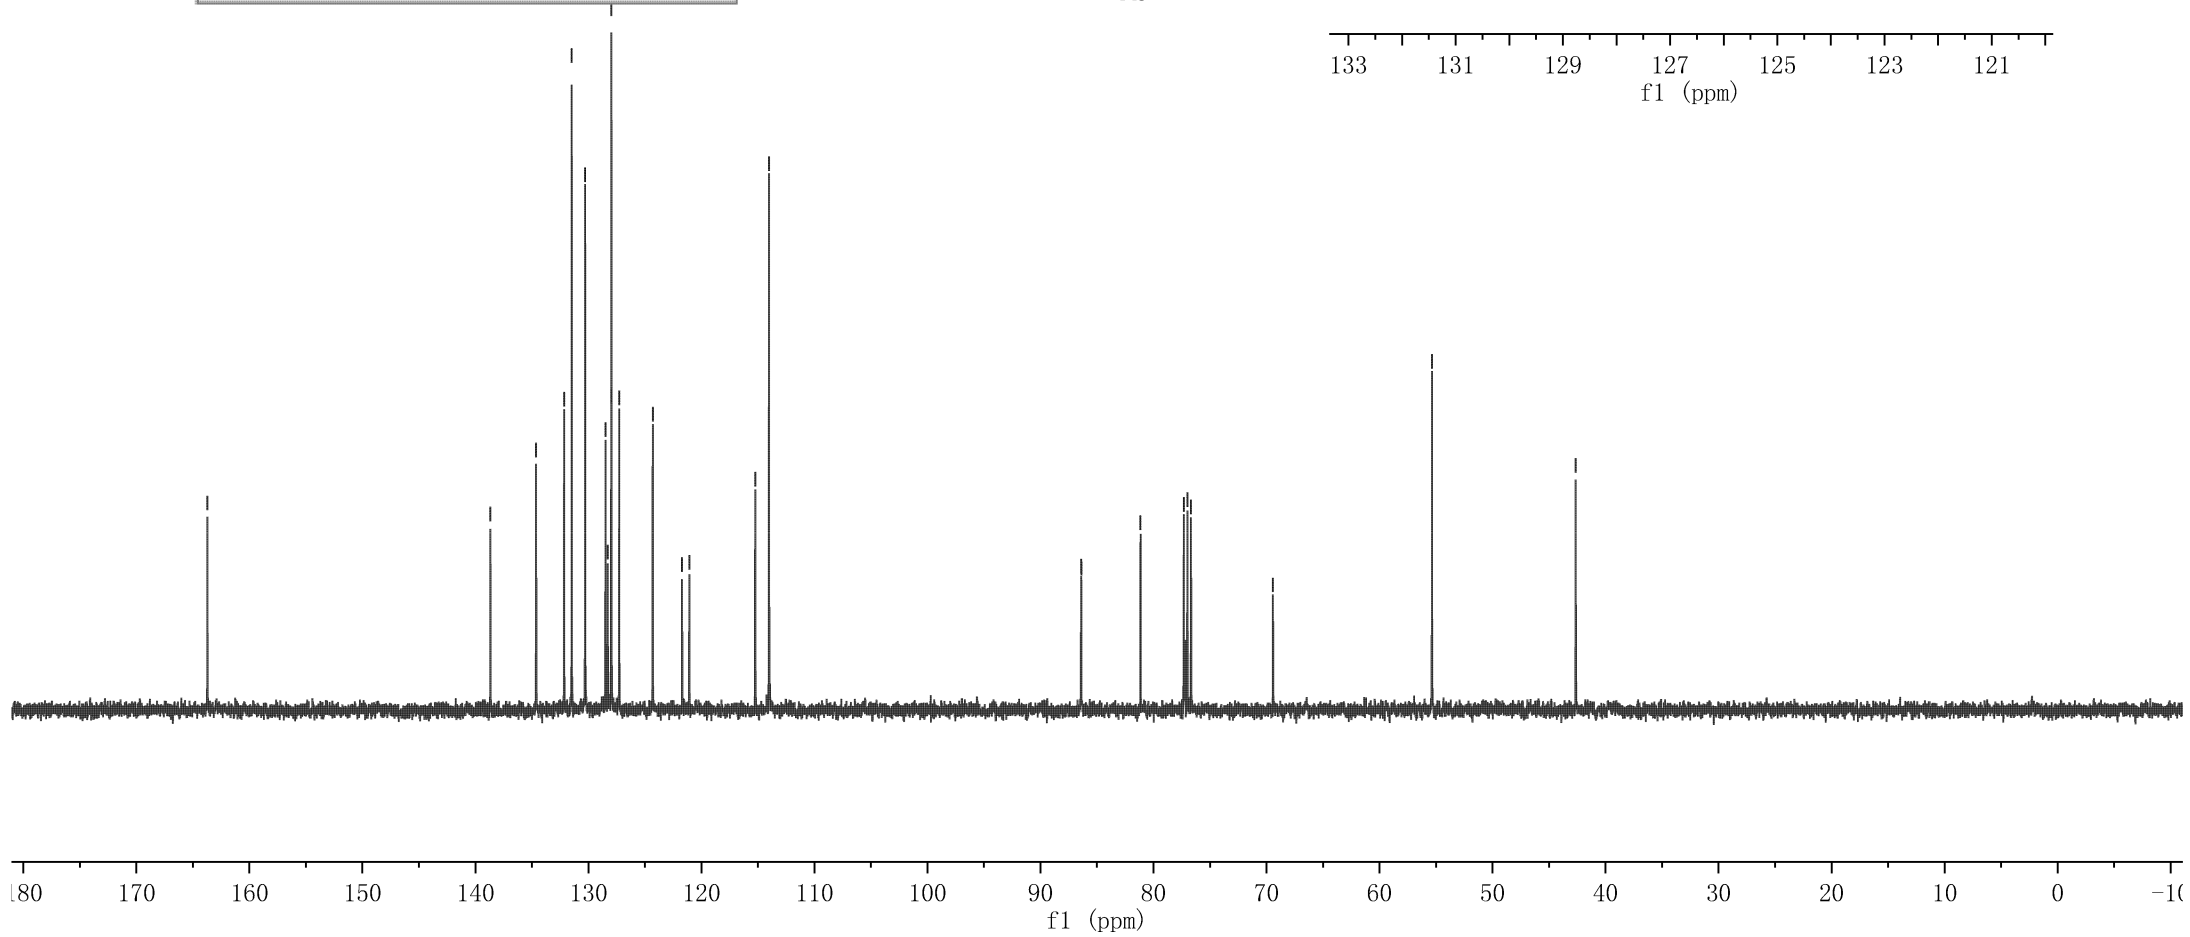

8.052  
8.034  
7.604  
7.587  
7.569  
7.537  
7.515  
7.492  
7.474  
7.395  
7.377  
7.307  
7.271  
7.235  
7.185  
7.168  
7.117  
7.073

5.740  
5.697

5.118  
5.091

4.609

| Parameter                | Value               |
|--------------------------|---------------------|
| 1 Title                  | HFL-4-14-H          |
| 2 Origin                 | Bruker BioSpin GmbH |
| 3 Solvent                | CDCl3               |
| 4 Temperature            | 295.9               |
| 5 Number of Scans        | 5                   |
| 6 Acquisition Time       | 3.9846              |
| 7 Acquisition Date       | 2018-03-17T15:31:43 |
| 8 Spectrometer Frequency | 400.03              |
| 9 Spectral Width         | 8223.7              |

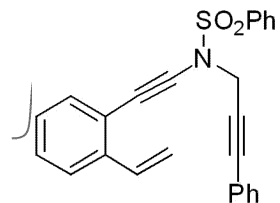

**1c**

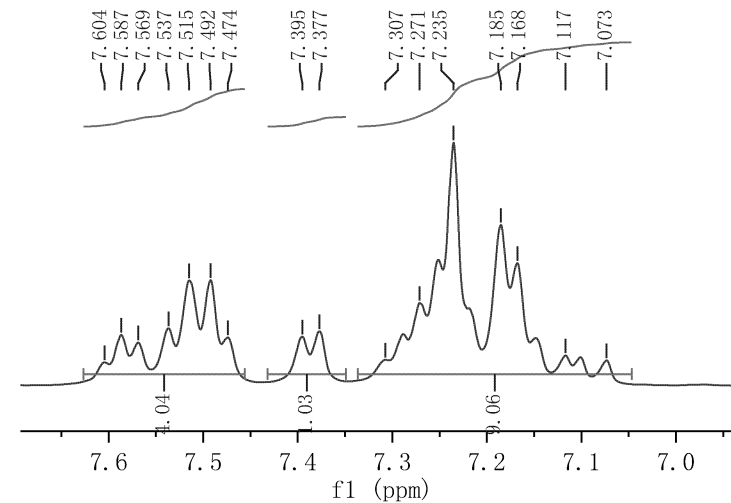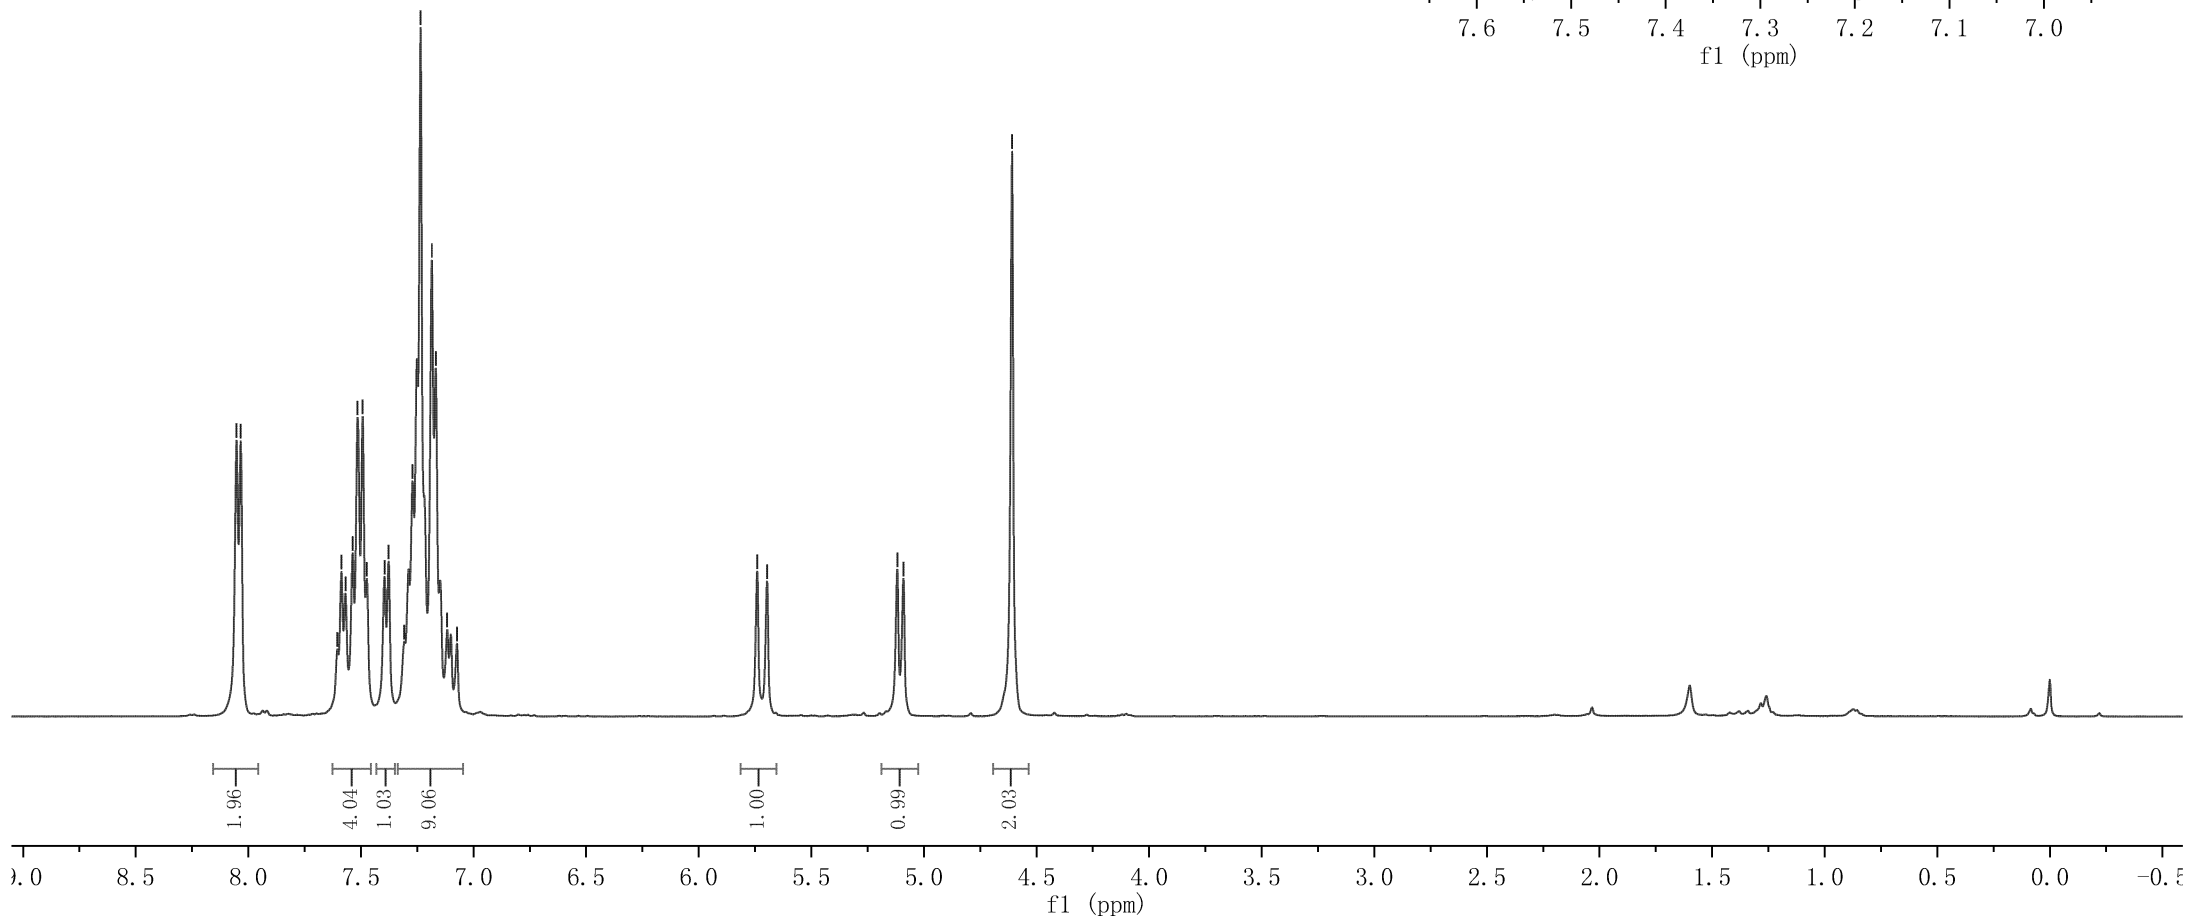

138.94  
137.17  
134.75  
133.78  
132.37  
131.64  
128.97  
128.66  
128.17  
128.11  
127.37  
124.46  
121.77  
121.11  
115.41

86.66  
85.96  
80.99  
77.32  
77.00  
76.68  
69.70

42.91

| Parameter                | Value               |
|--------------------------|---------------------|
| 1 Title                  | HFL-4-14-C          |
| 2 Origin                 | Bruker BioSpin GmbH |
| 3 Solvent                | CDC13               |
| 4 Temperature            | 295.6               |
| 5 Number of Scans        | 28                  |
| 6 Acquisition Time       | 1.3631              |
| 7 Acquisition Date       | 2018-03-17T15:19:06 |
| 8 Spectrometer Frequency | 100.59              |
| 9 Spectral Width         | 24038.5             |

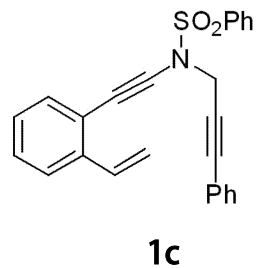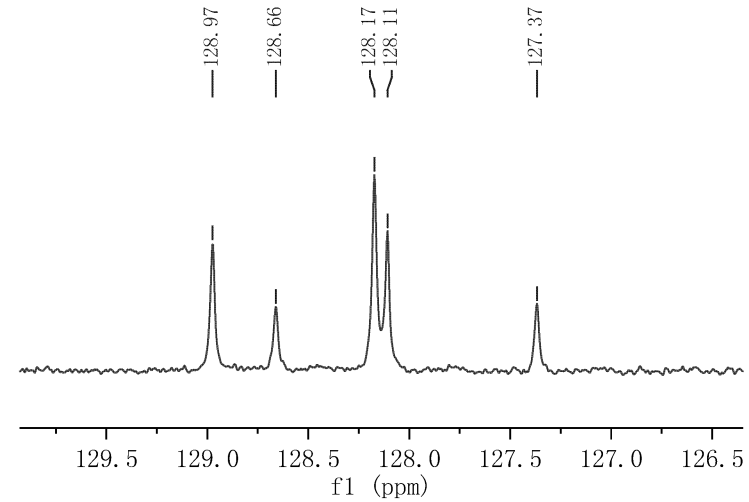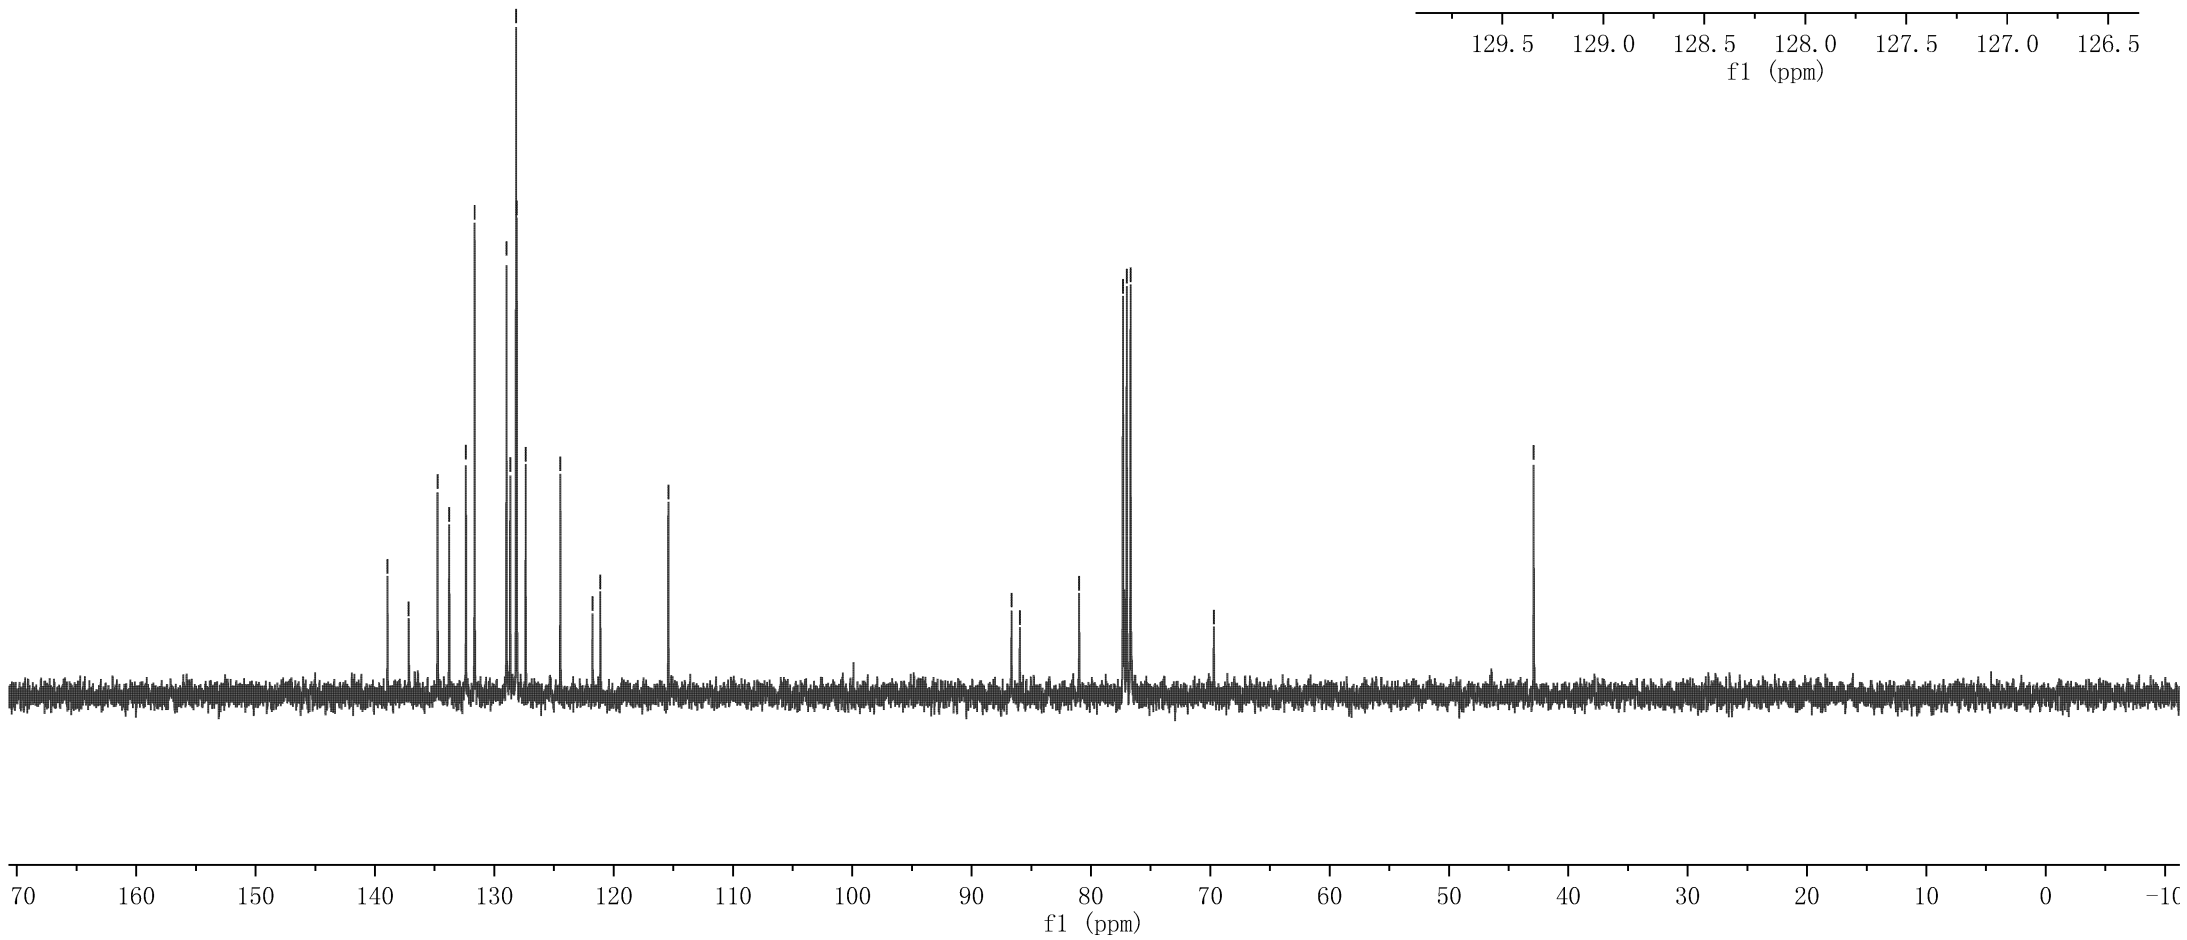

7.566  
7.547  
7.474  
7.471  
7.455  
7.450  
7.430  
7.427  
7.364  
7.347  
7.342  
7.324  
7.292  
7.276  
7.257  
7.235  
7.230  
7.213  
7.191  
7.186  
7.172

5.804  
5.802  
5.760  
5.758

5.246  
5.244  
5.219  
5.216

4.616

3.264

| Parameter                | Value               |
|--------------------------|---------------------|
| 1 Title                  | HFL-3-230-H         |
| 2 Origin                 | Bruker BioSpin GmbH |
| 3 Solvent                | CDC13               |
| 4 Temperature            | 295.4               |
| 5 Number of Scans        | 7                   |
| 6 Acquisition Time       | 3.9846              |
| 7 Acquisition Date       | 2018-03-09T21:51:40 |
| 8 Spectrometer Frequency | 400.03              |
| 9 Spectral Width         | 8223.7              |

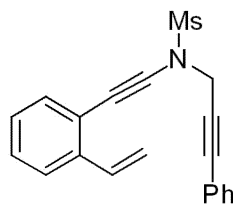

**1d**

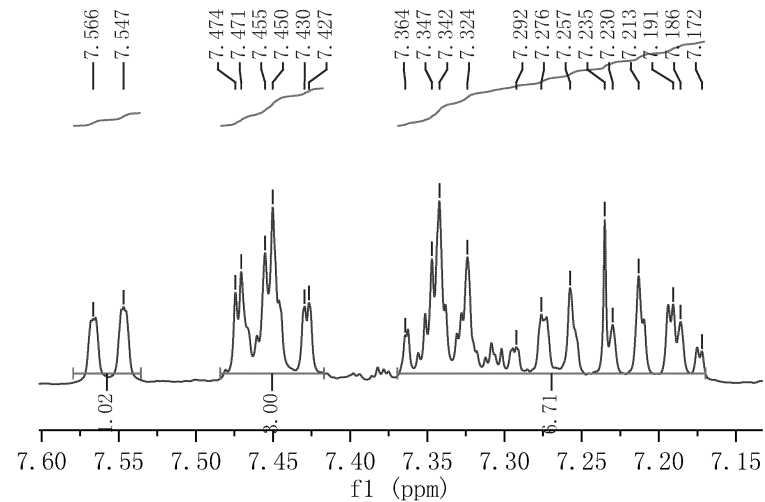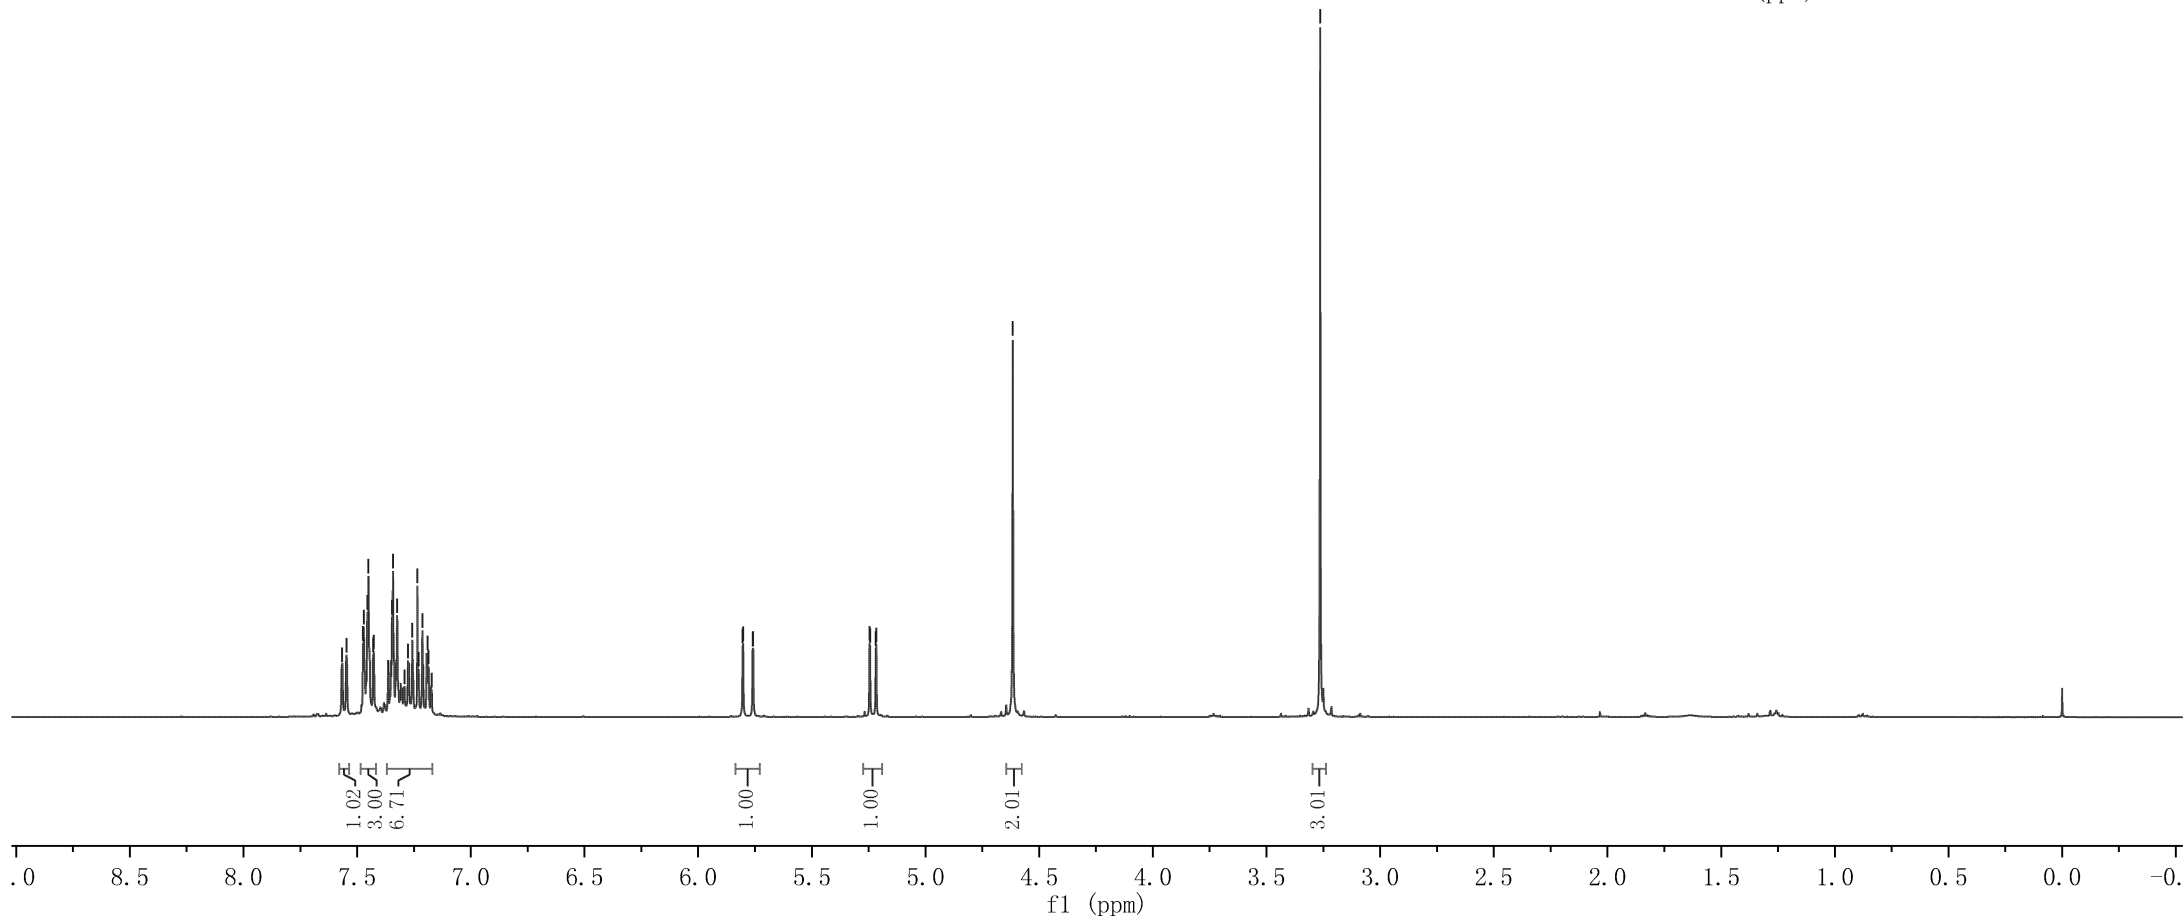

138.95  
 134.67  
 132.31  
 131.79  
 129.05  
 128.41  
 128.30  
 127.41  
 124.62  
 121.58  
 120.83  
 115.73

87.05  
 85.58  
 81.45  
 77.32  
 77.00  
 76.68  
 69.89

42.89  
 38.60

| Parameter                | Value               |
|--------------------------|---------------------|
| 1 Title                  | HFL-3-230-C         |
| 2 Origin                 | Bruker BioSpin GmbH |
| 3 Solvent                | CDC13               |
| 4 Temperature            | 296.2               |
| 5 Number of Scans        | 45                  |
| 6 Acquisition Time       | 1.3631              |
| 7 Acquisition Date       | 2018-03-09T21:56:09 |
| 8 Spectrometer Frequency | 100.59              |
| 9 Spectral Width         | 24038.5             |

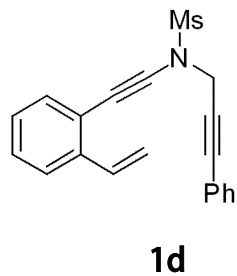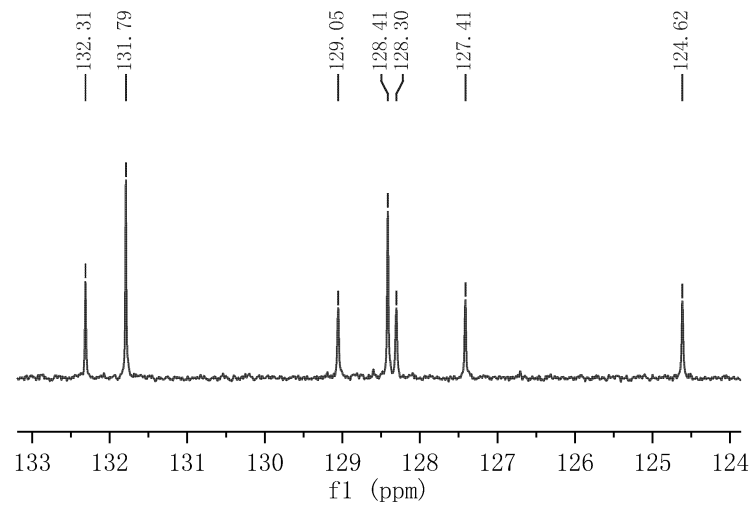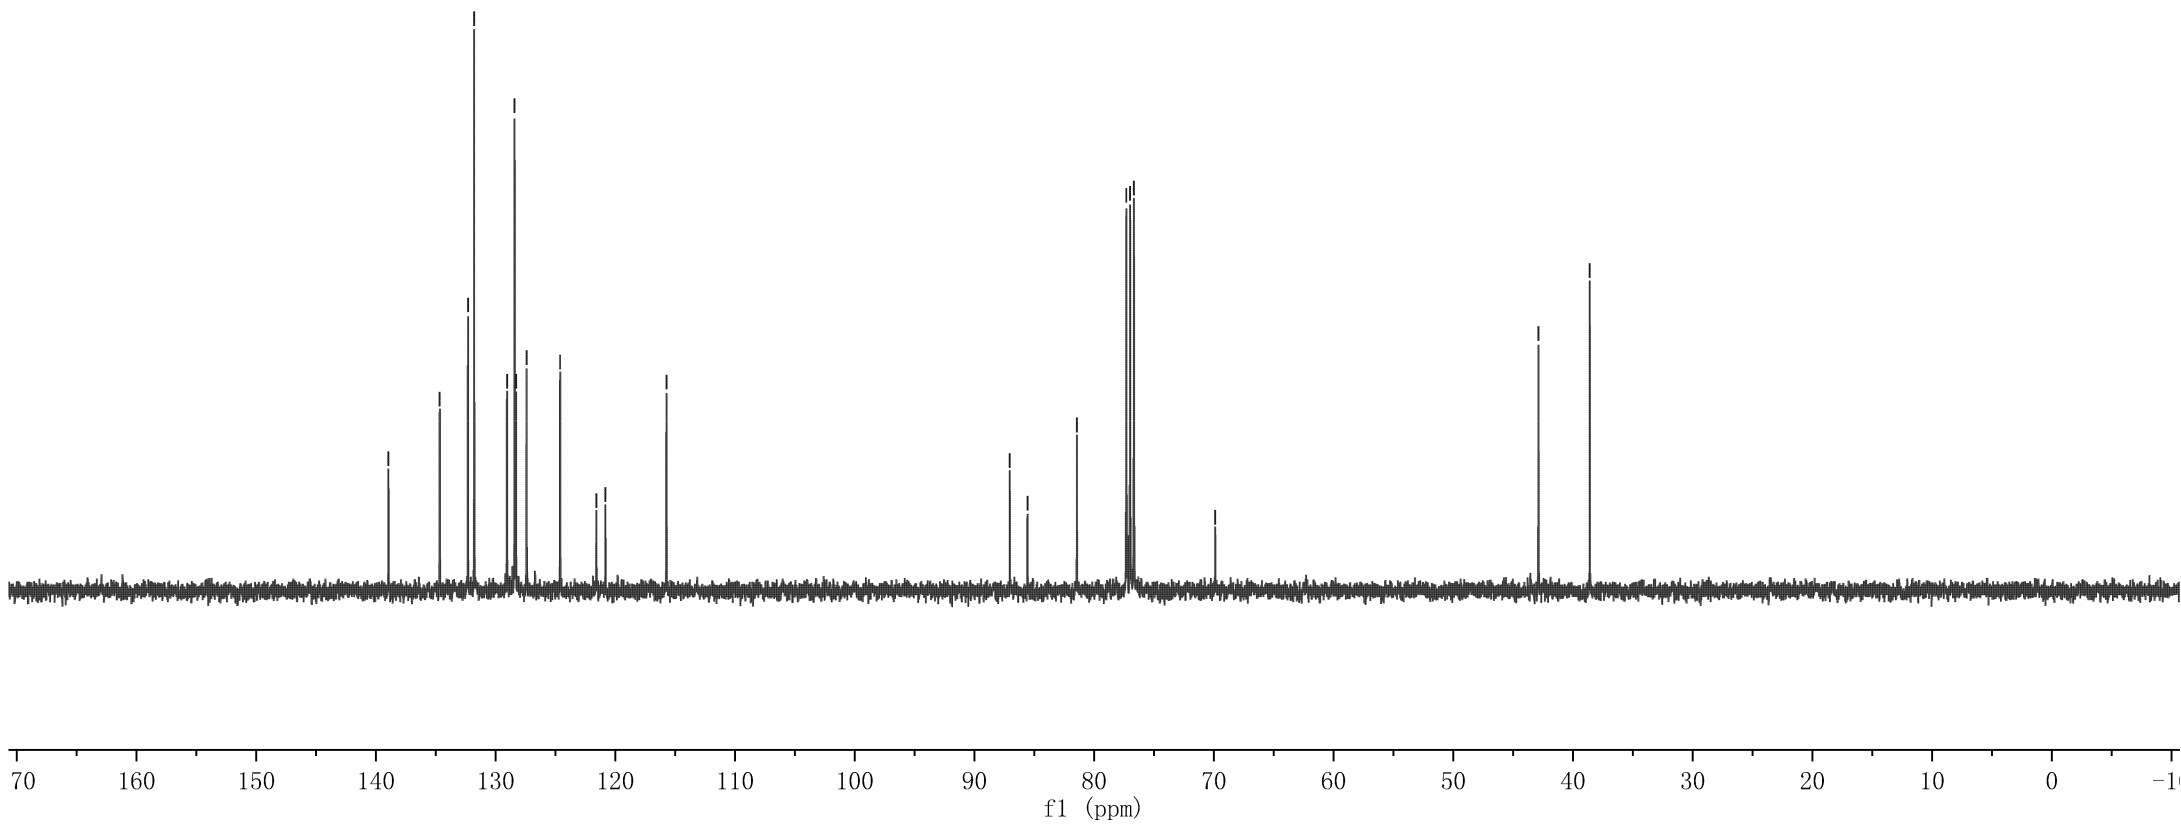

7.921  
7.901  
7.537  
7.518  
7.396  
7.378  
7.274  
7.255  
7.238  
7.184  
7.165  
7.049

5.747  
5.703

5.131  
5.104

4.568

2.345  
2.315

| Parameter                | Value               |
|--------------------------|---------------------|
| 1 Title                  | HFL-4-15-H          |
| 2 Origin                 | Bruker BioSpin GmbH |
| 3 Solvent                | CDC13               |
| 4 Temperature            | 295.7               |
| 5 Number of Scans        | 9                   |
| 6 Acquisition Time       | 3.9846              |
| 7 Acquisition Date       | 2018-03-17T15:24:32 |
| 8 Spectrometer Frequency | 400.03              |
| 9 Spectral Width         | 8223.7              |

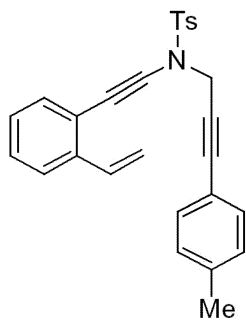

**1e**

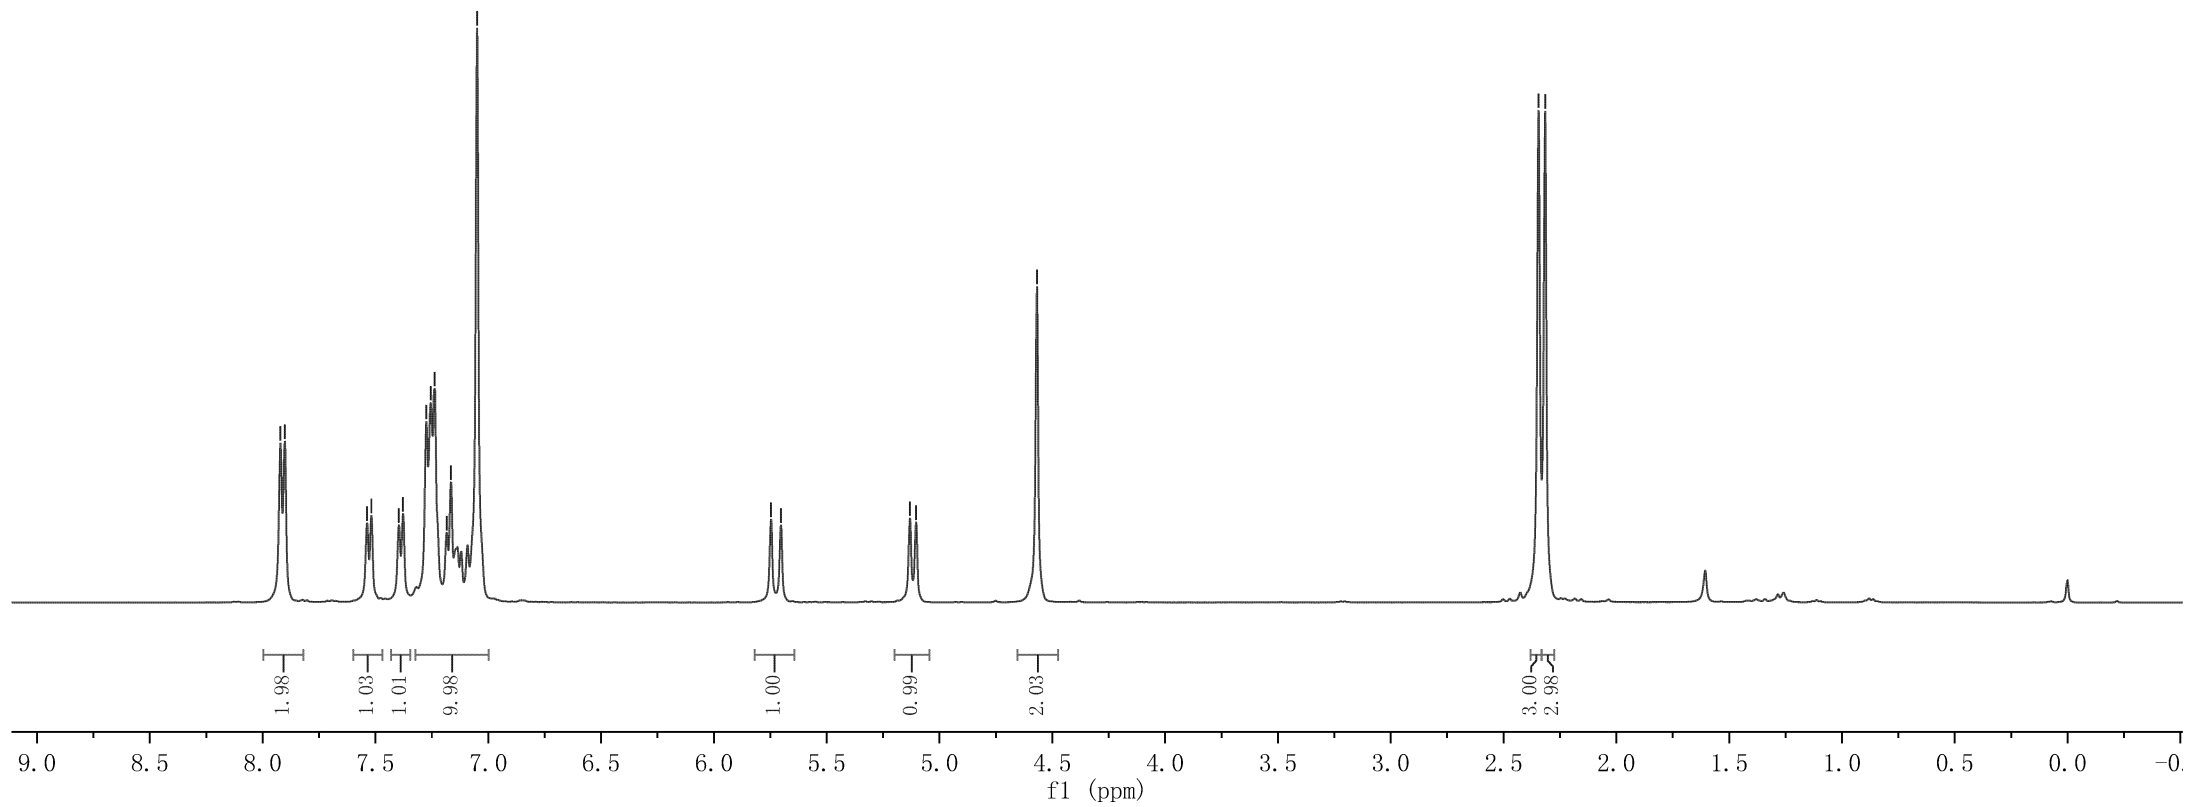



144.83  
138.88  
138.74  
134.86  
134.22  
132.31  
131.53  
129.58  
128.82  
128.22  
128.04  
127.34  
124.42  
121.28  
118.81  
115.30

86.70  
86.30  
80.40  
77.32  
77.00  
76.68  
69.57

42.91

21.51  
21.40

| Parameter                | Value               |
|--------------------------|---------------------|
| 1 Title                  | HFL-4-15-C          |
| 2 Origin                 | Bruker BioSpin GmbH |
| 3 Solvent                | CDC13               |
| 4 Temperature            | 295.7               |
| 5 Number of Scans        | 34                  |
| 6 Acquisition Time       | 1.3631              |
| 7 Acquisition Date       | 2018-03-17T15:27:04 |
| 8 Spectrometer Frequency | 100.59              |
| 9 Spectral Width         | 24038.5             |

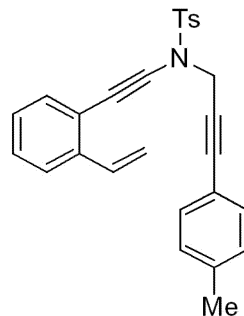

1e

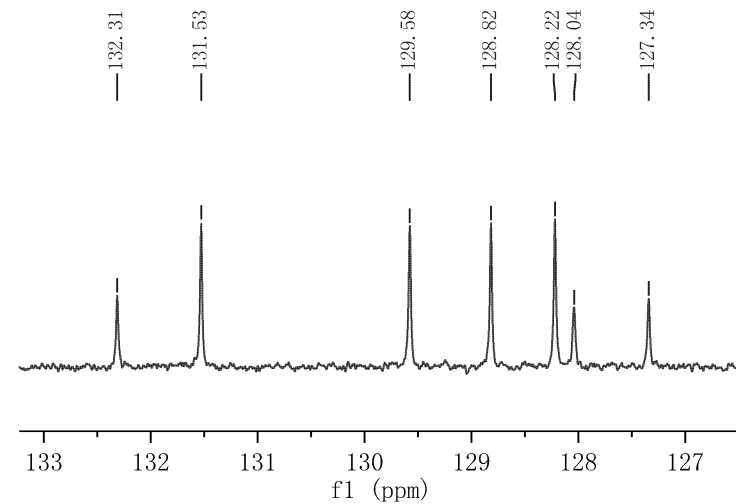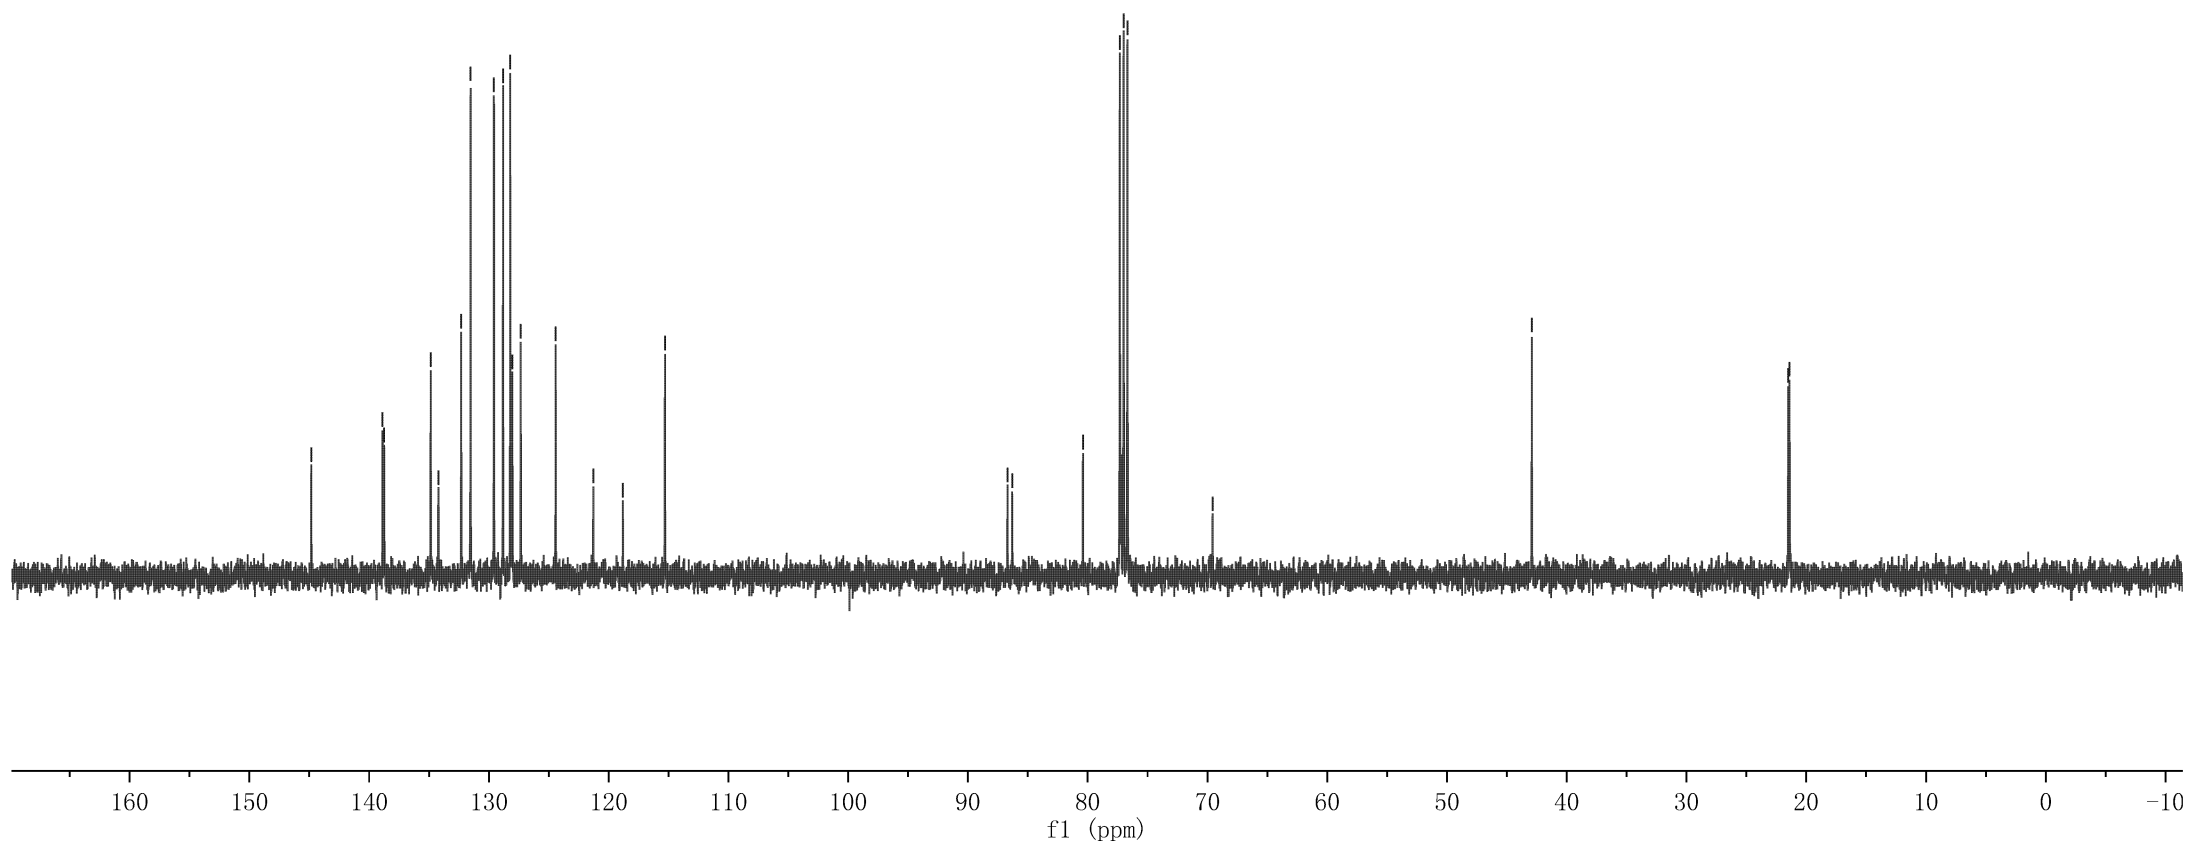

| Parameter                | Value               |
|--------------------------|---------------------|
| 1 Title                  | HFL-3-127-H         |
| 2 Origin                 | Bruker BioSpin GmbH |
| 3 Solvent                | CDC13               |
| 4 Temperature            | 295.6               |
| 5 Number of Scans        | 7                   |
| 6 Acquisition Time       | 3.9846              |
| 7 Acquisition Date       | 2018-01-19T14:05:51 |
| 8 Spectrometer Frequency | 400.13              |
| 9 Spectral Width         | 8223.7              |

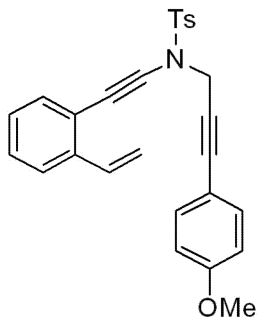

**1f**

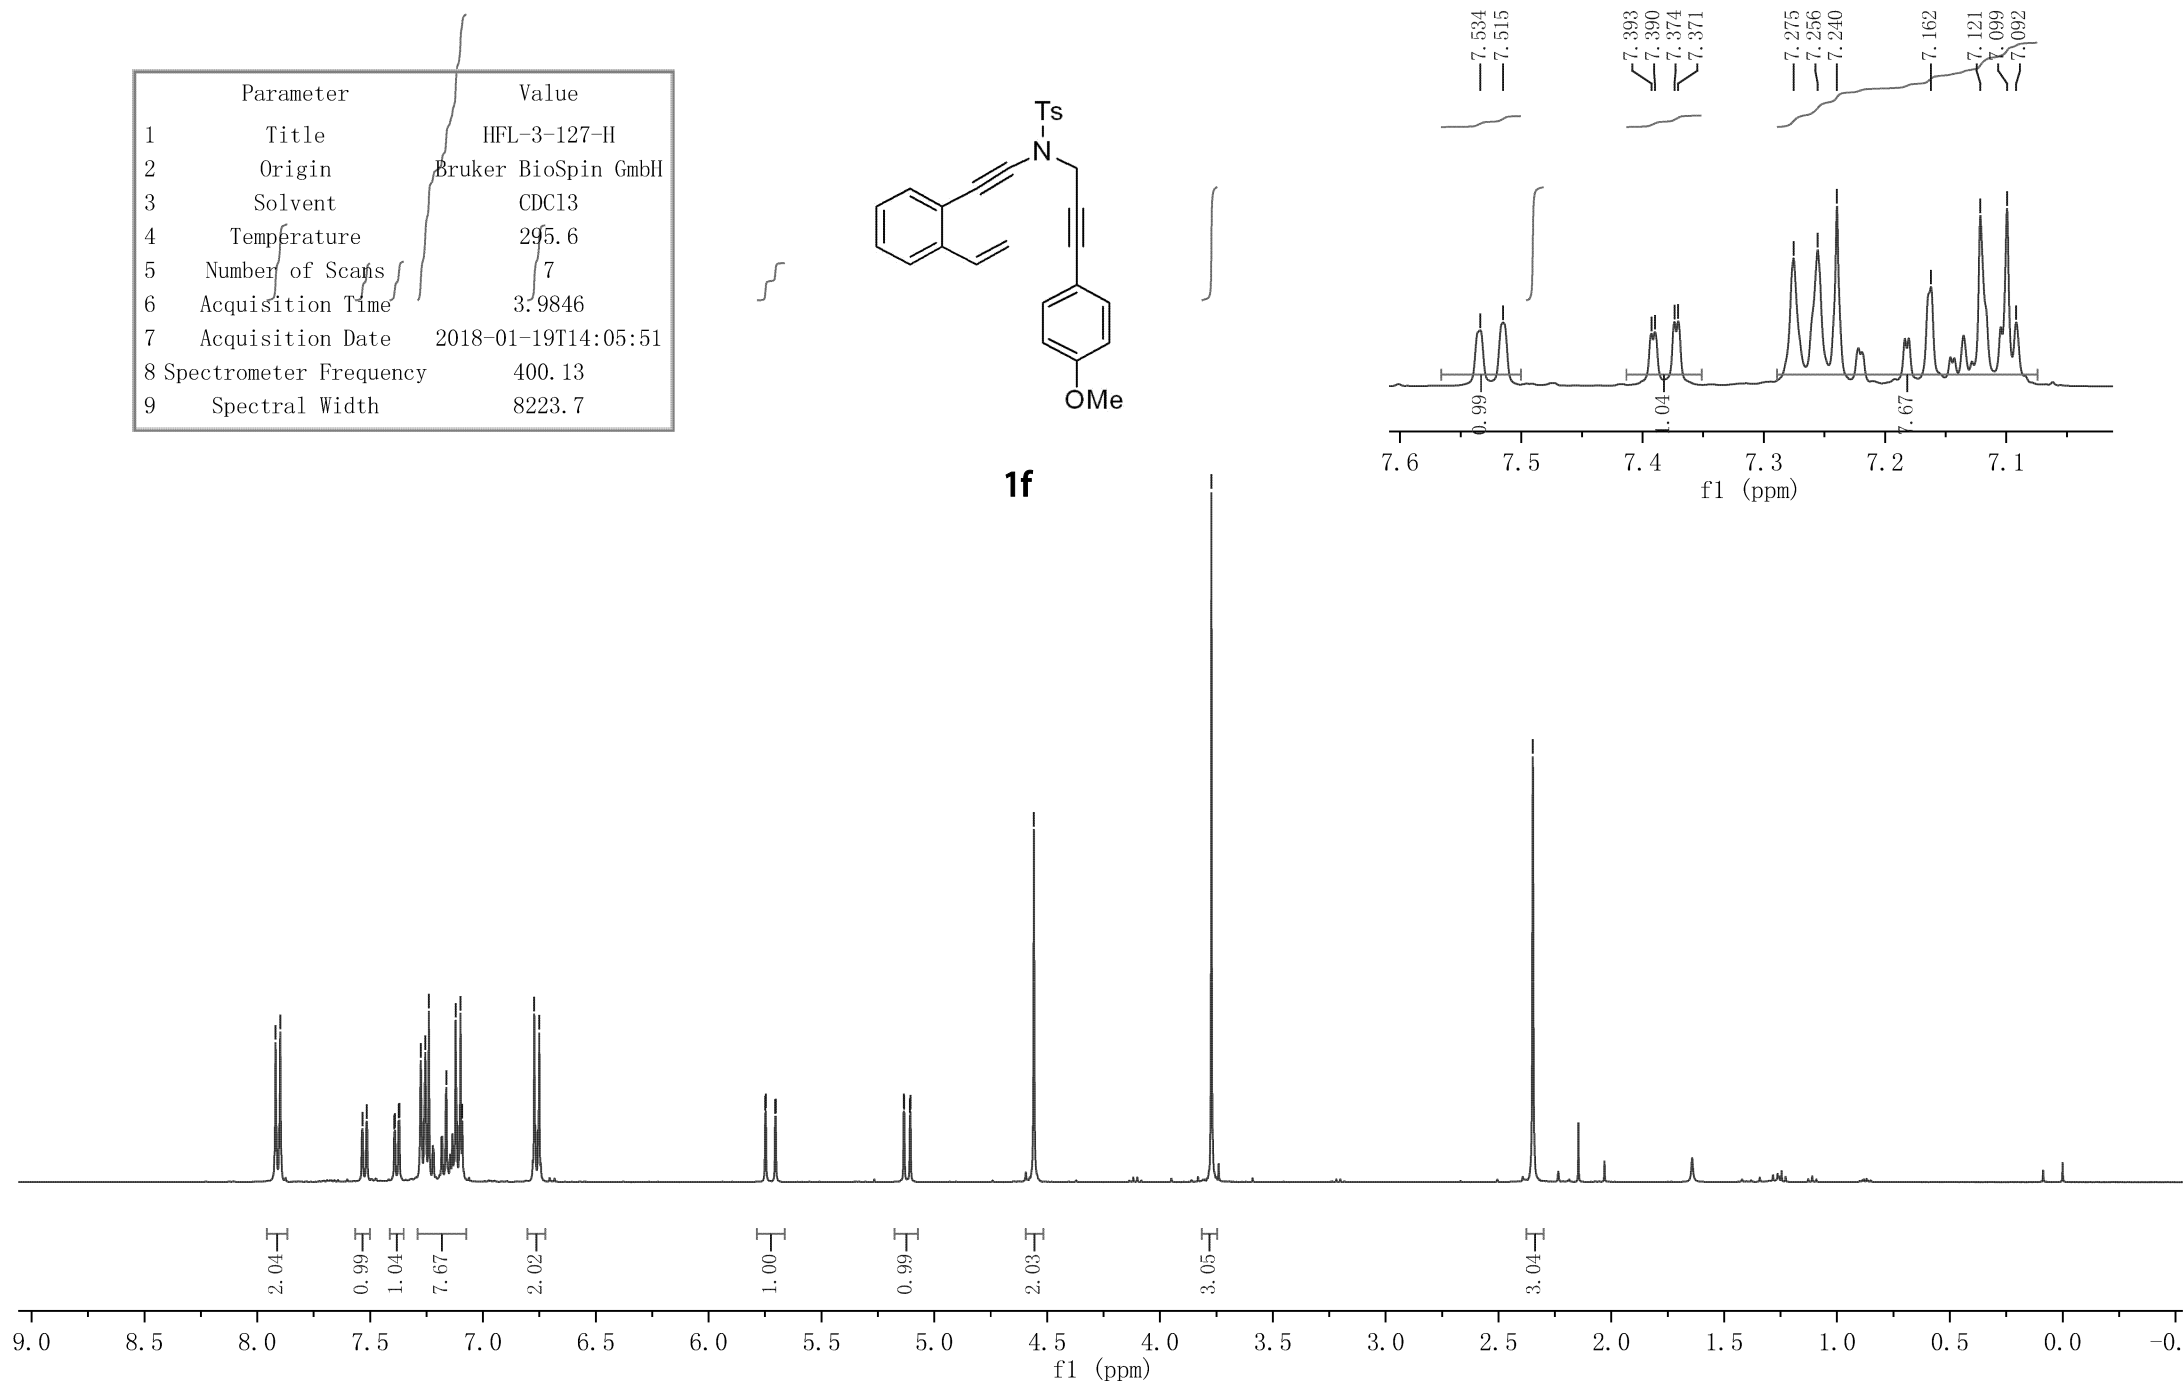

—159.76  
 —144.81  
 —138.83  
 134.85  
 134.23  
 133.12  
 132.26  
 129.55  
 128.20  
 128.01  
 127.34  
 124.42  
 121.29  
 115.28  
 113.95  
 113.69

86.53  
 86.35  
 79.70  
 77.32  
 77.00  
 76.68  
 —69.58

—55.21  
 —42.96  
 —21.51

| Parameter                | Value               |
|--------------------------|---------------------|
| 1 Title                  | HFL-3-127-C         |
| 2 Origin                 | Bruker BioSpin GmbH |
| 3 Solvent                | CDC13               |
| 4 Temperature            | 295.6               |
| 5 Number of Scans        | 12                  |
| 6 Acquisition Time       | 1.3631              |
| 7 Acquisition Date       | 2018-01-19T14:08:05 |
| 8 Spectrometer Frequency | 100.61              |
| 9 Spectral Width         | 24038.5             |

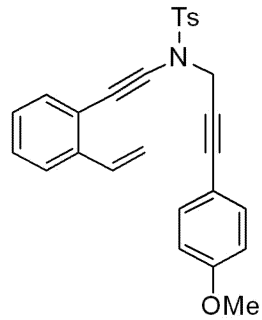

**1f**

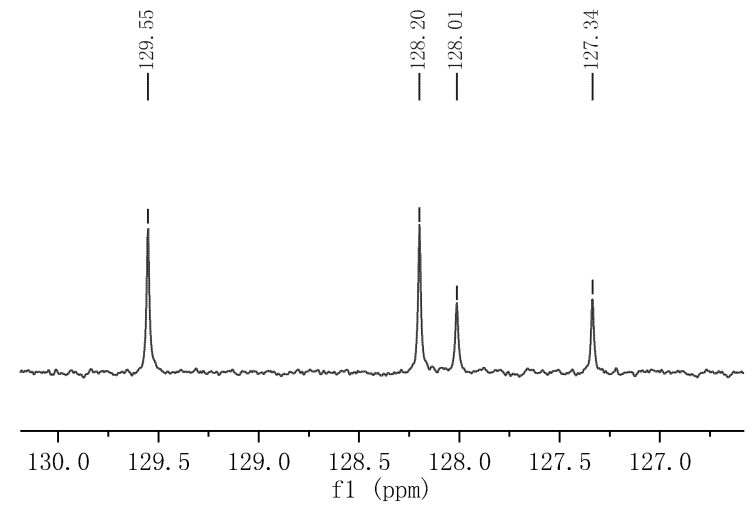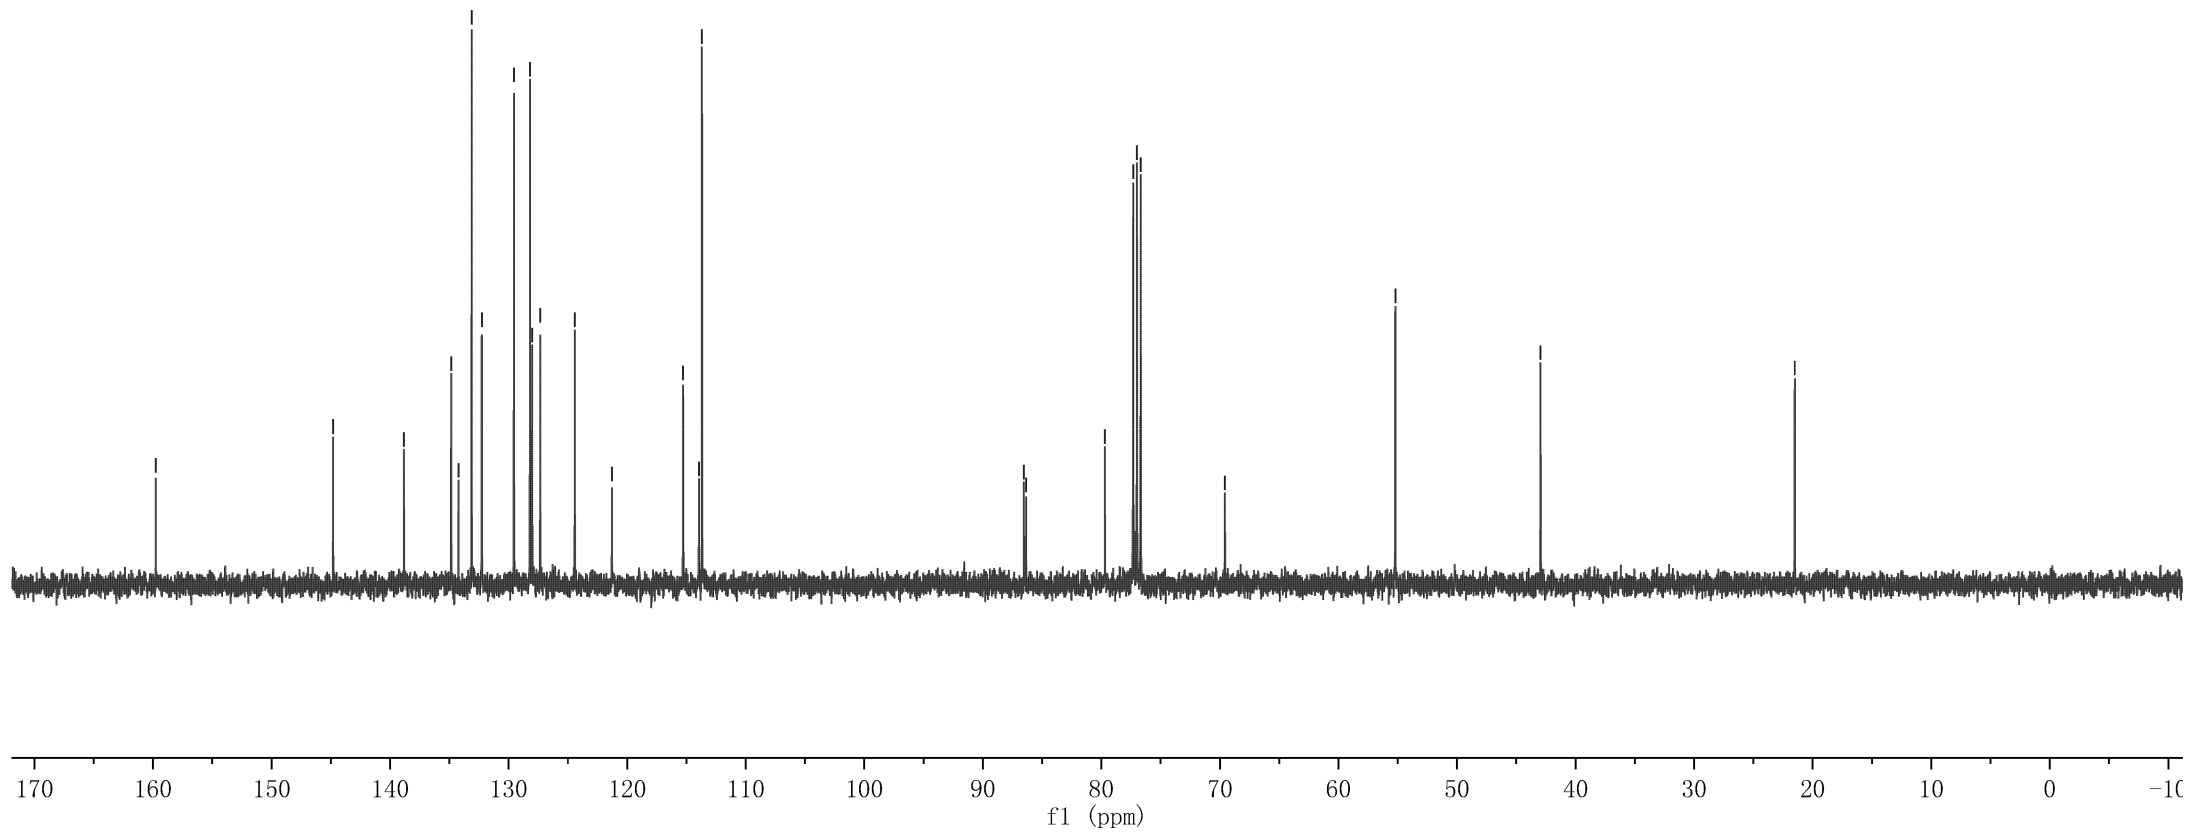

7.932  
7.912  
7.544  
7.526  
7.472  
7.451  
7.412  
7.391  
7.344  
7.328  
7.260  
7.229  
7.208  
7.153  
7.125

5.753  
5.751  
5.709  
5.707

5.154  
5.152  
5.126  
5.124

4.579

2.310

| Parameter                | Value               |
|--------------------------|---------------------|
| 1 Title                  | hfl_4-44-h          |
| 2 Origin                 | Bruker BioSpin GmbH |
| 3 Solvent                | CDC13               |
| 4 Temperature            | 295.3               |
| 5 Number of Scans        | 7                   |
| 6 Acquisition Time       | 3.9846              |
| 7 Acquisition Date       | 2018-03-27T21:46:22 |
| 8 Spectrometer Frequency | 400.03              |
| 9 Spectral Width         | 8223.7              |

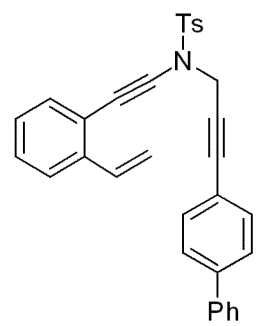

**1g**

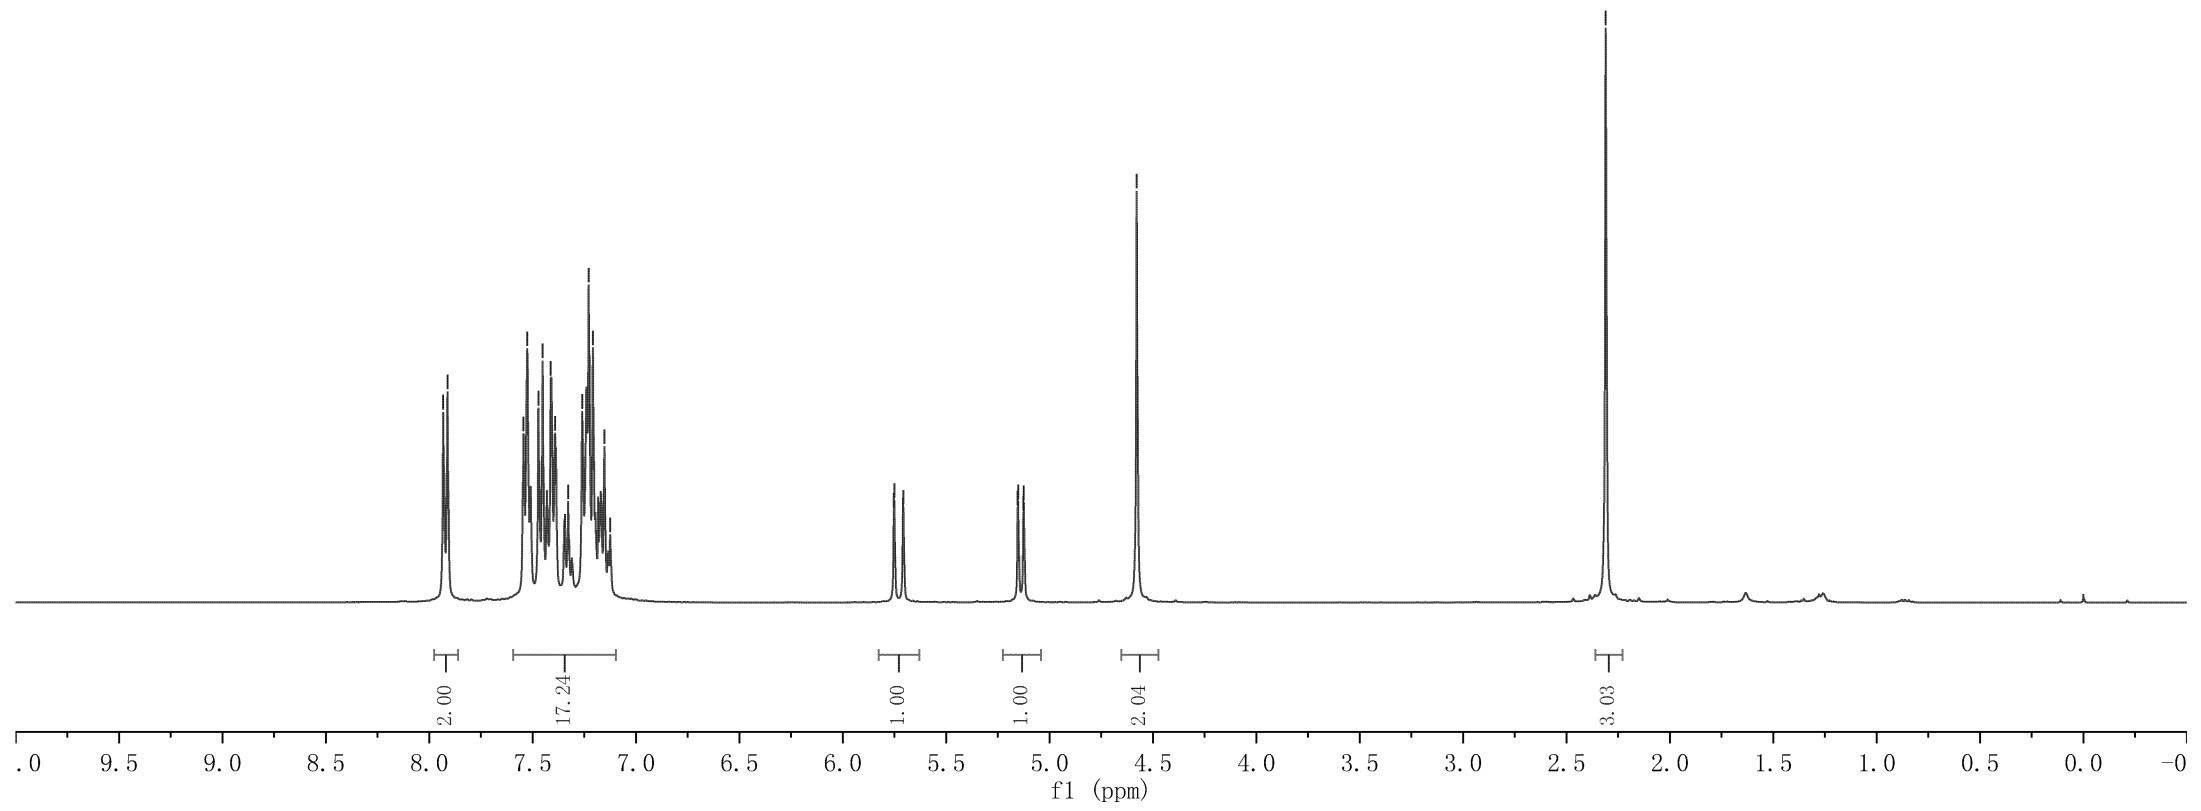

| Parameter                | Value               |
|--------------------------|---------------------|
| 1 Title                  | hf1-4-44-C          |
| 2 Origin                 | Bruker BioSpin GmbH |
| 3 Solvent                | CDC13               |
| 4 Temperature            | 295.5               |
| 5 Number of Scans        | 14                  |
| 6 Acquisition Time       | 1.3631              |
| 7 Acquisition Date       | 2018-03-27T21:48:58 |
| 8 Spectrometer Frequency | 100.59              |
| 9 Spectral Width         | 24038.5             |

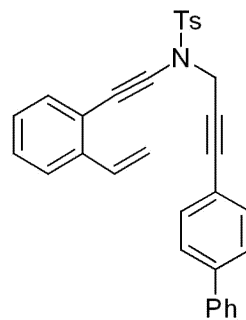

**1g**

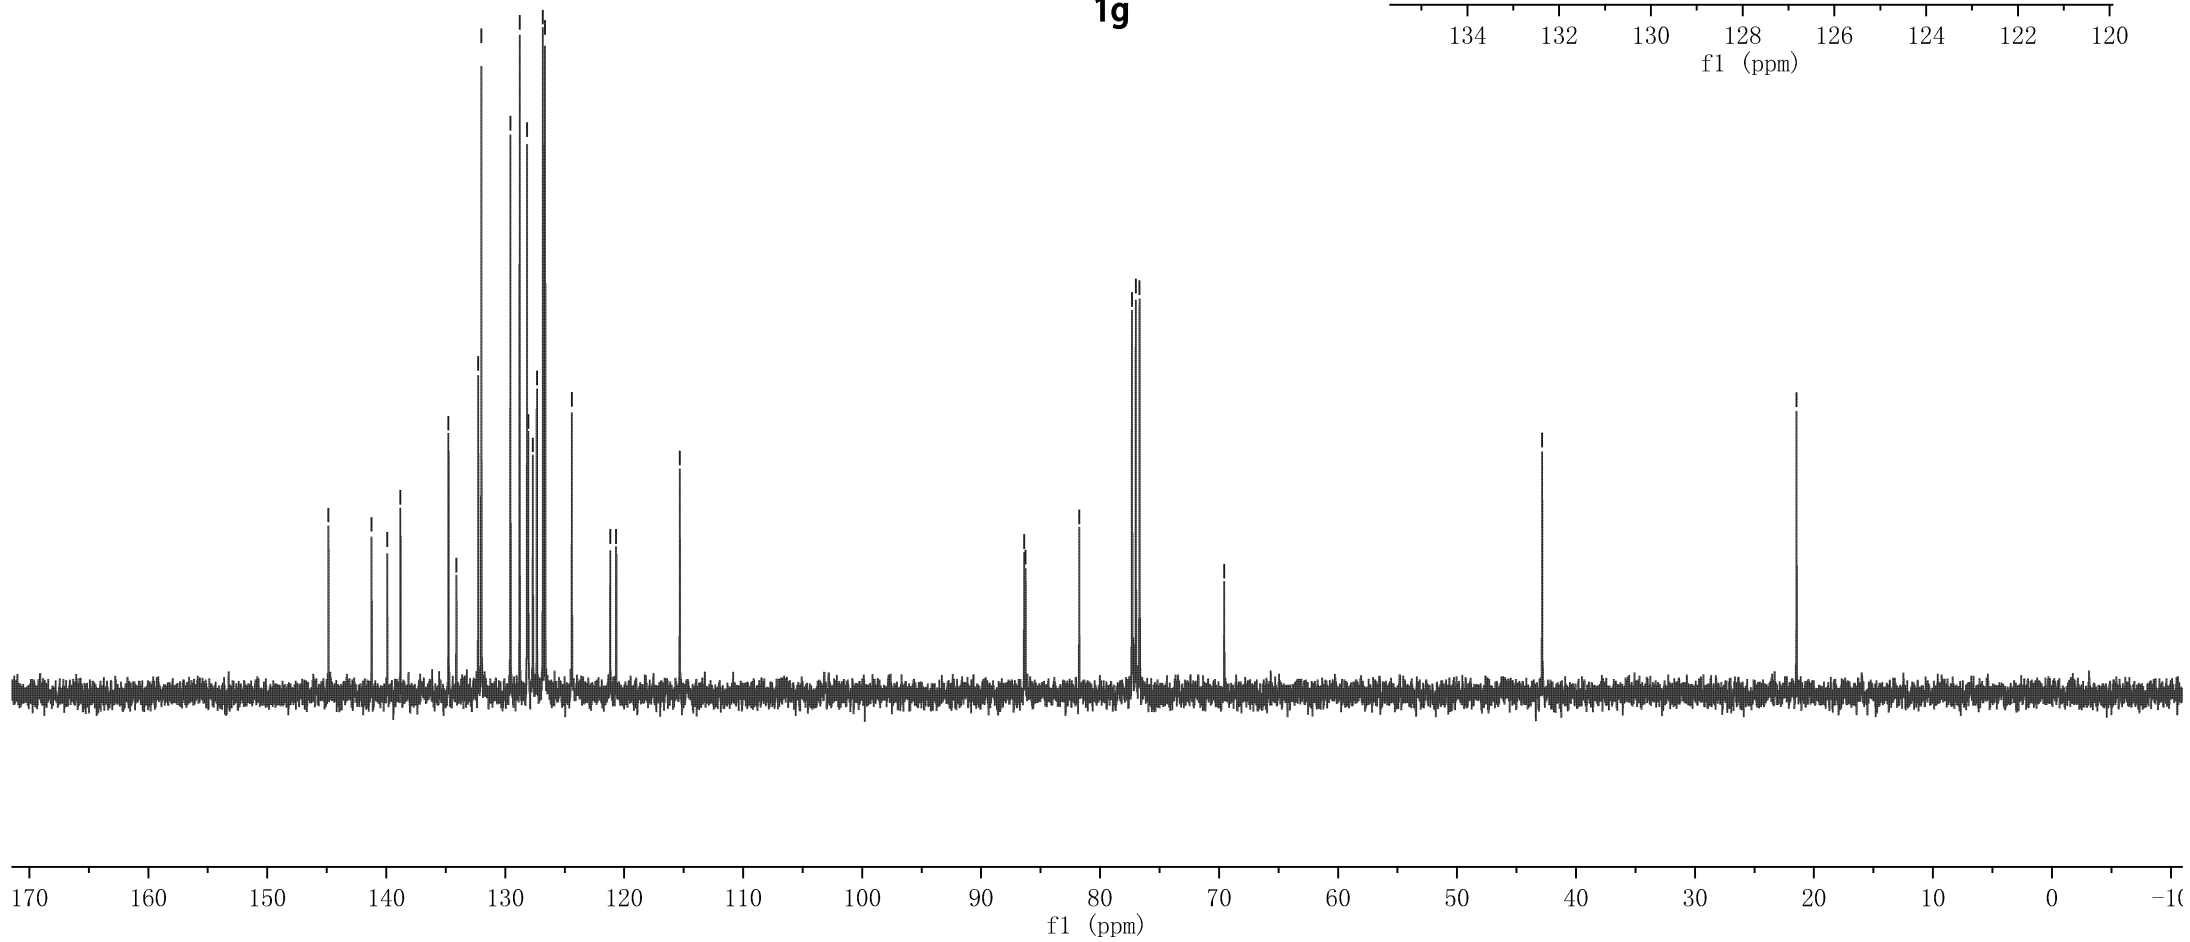

144.86  
141.23  
139.91  
138.80  
134.77  
132.27  
132.01  
129.56  
128.79  
128.16  
128.06  
127.68  
127.34  
126.83  
126.65  
124.40  
113.32

86.38  
86.26  
81.75  
77.32  
77.00  
76.68  
69.57

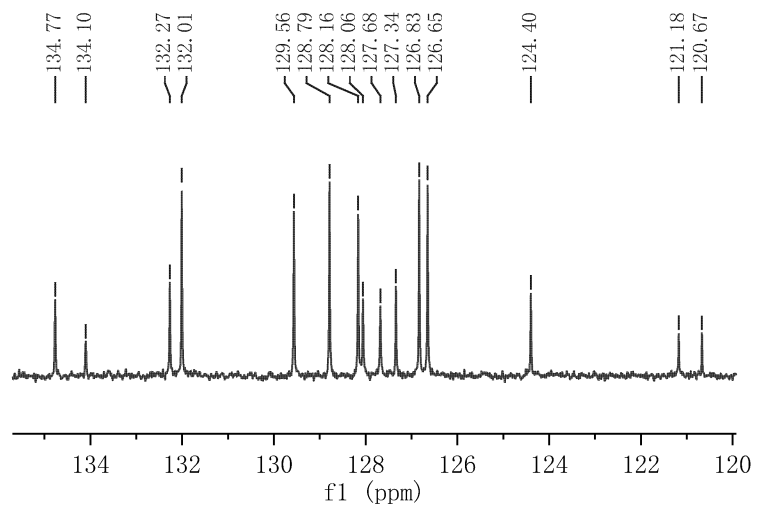

134.77  
134.10  
132.27  
132.01  
129.56  
128.79  
128.16  
128.06  
127.68  
127.34  
126.83  
126.65  
124.40  
121.18  
120.67

7.914  
7.894  
7.523  
7.503  
7.387  
7.368  
7.251  
7.230  
7.149  
7.129  
7.097  
6.939  
6.918  
6.897

5.748  
5.704

5.127  
5.100

4.549

2.309

| Parameter                | Value               |
|--------------------------|---------------------|
| 1 Title                  | hf1-3-240-h-3.16    |
| 2 Origin                 | Bruker BioSpin GmbH |
| 3 Solvent                | CDC13               |
| 4 Temperature            | 295.5               |
| 5 Number of Scans        | 5                   |
| 6 Acquisition Time       | 3.9846              |
| 7 Acquisition Date       | 2018-03-16T09:33:30 |
| 8 Spectrometer Frequency | 400.03              |
| 9 Spectral Width         | 8223.7              |

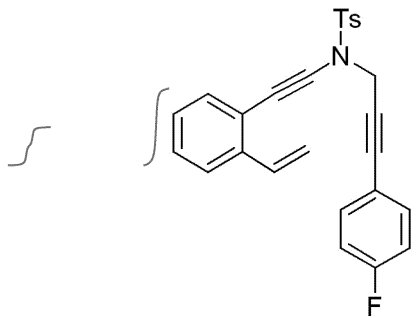

1h

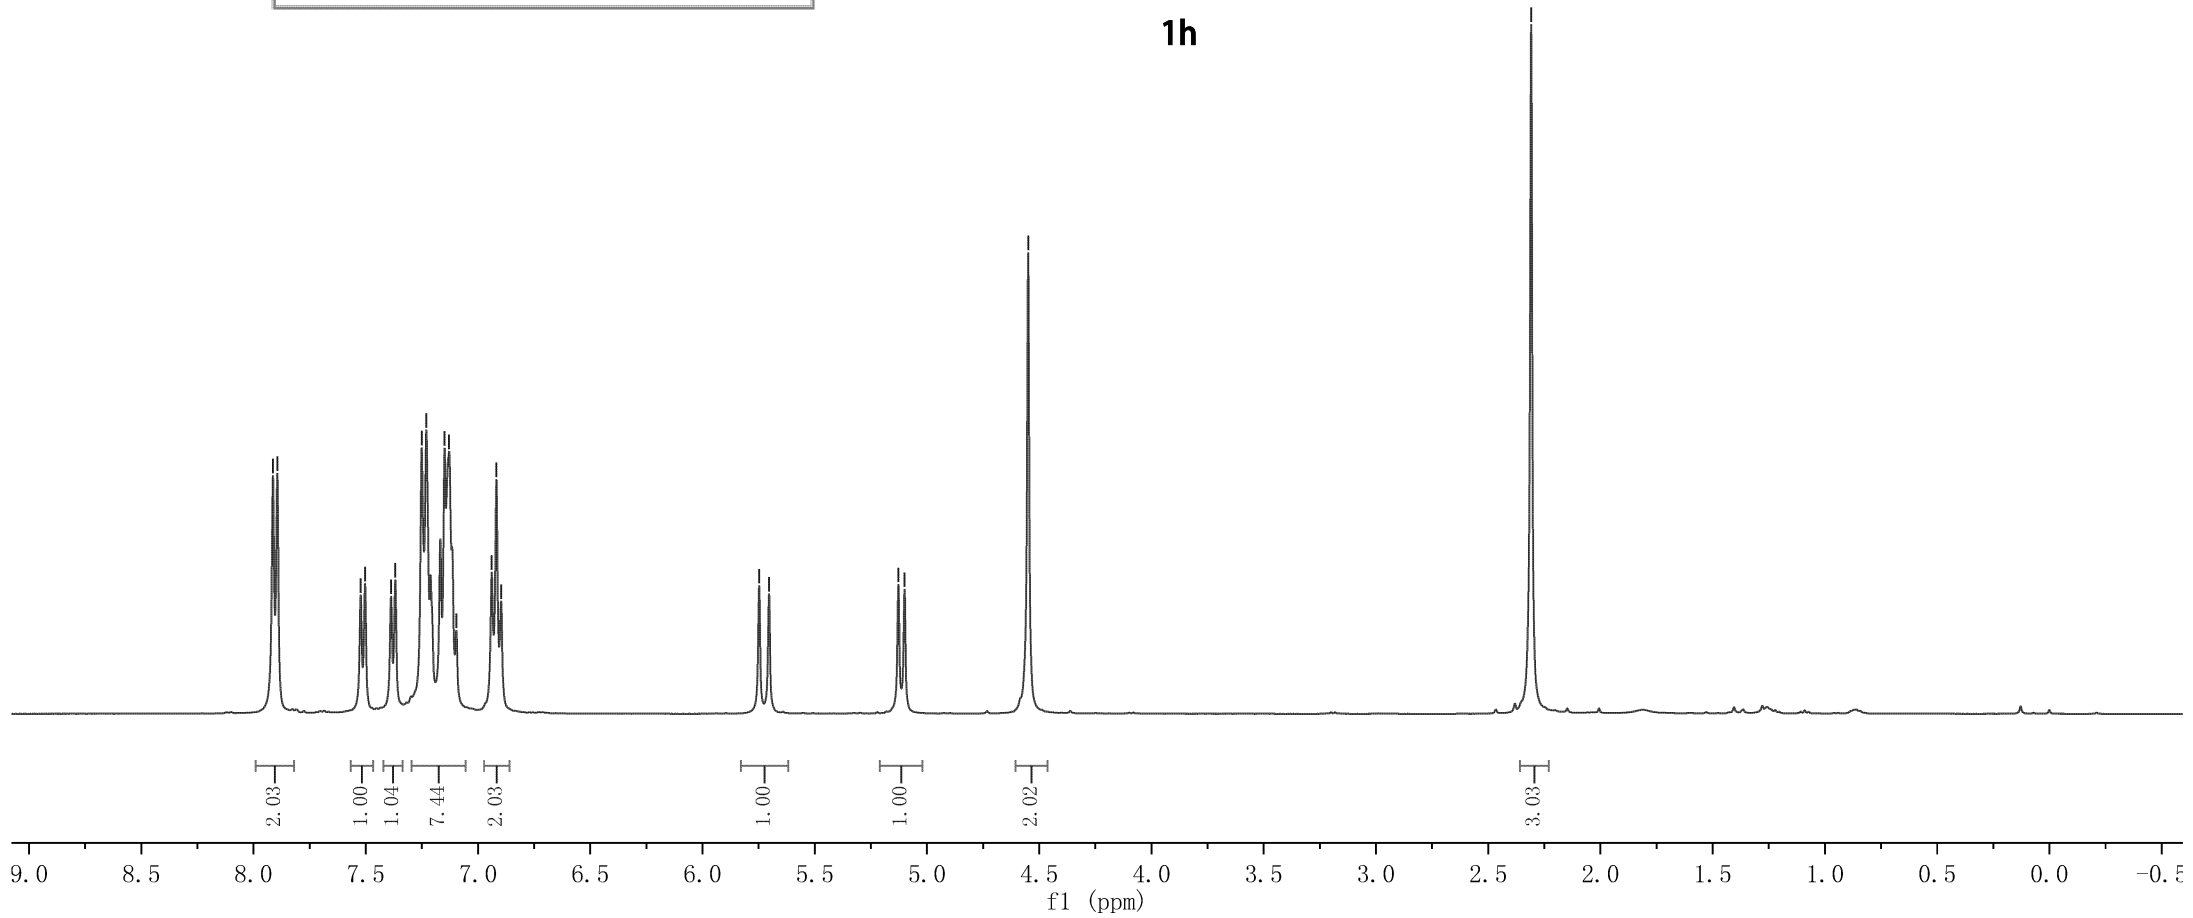

— 163.64  
— 161.15  
  
— 144.84  
  
— 138.66  
— 134.64  
— 134.00  
— 133.50  
— 133.42  
— 132.13  
— 129.48  
— 128.05  
— 127.30  
— 124.34  
— 121.03  
— 117.85  
— 117.82  
— 115.36  
— 115.22  
— 115.14

— 86.16  
— 85.33  
  
— 80.86  
— 77.32  
— 77.00  
— 76.68  
  
— 69.50

— 42.62  
  
  
  
  
  
  
  
  
  
— 21.32

| Parameter                | Value               |
|--------------------------|---------------------|
| 1 Title                  | hf1-3-240-C-3.16    |
| 2 Origin                 | Bruker BioSpin GmbH |
| 3 Solvent                | CDC13               |
| 4 Temperature            | 295.6               |
| 5 Number of Scans        | 25                  |
| 6 Acquisition Time       | 1.3631              |
| 7 Acquisition Date       | 2018-03-16T09:36:13 |
| 8 Spectrometer Frequency | 100.59              |
| 9 Spectral Width         | 24038.5             |

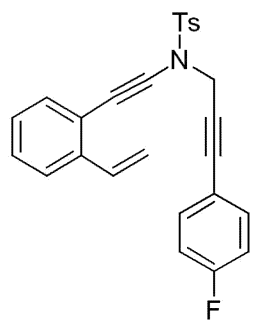

**1h**

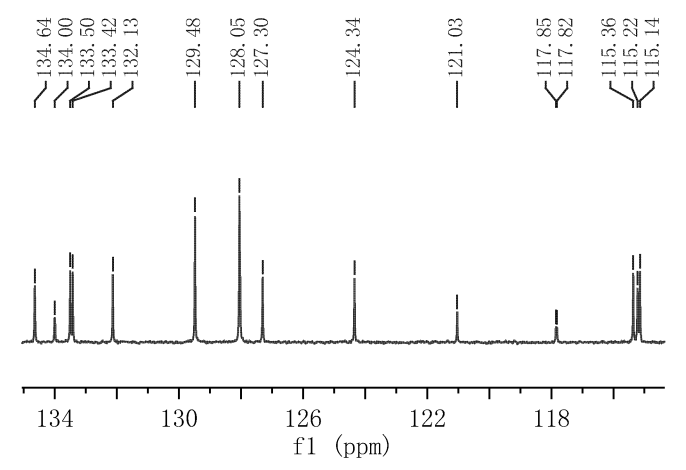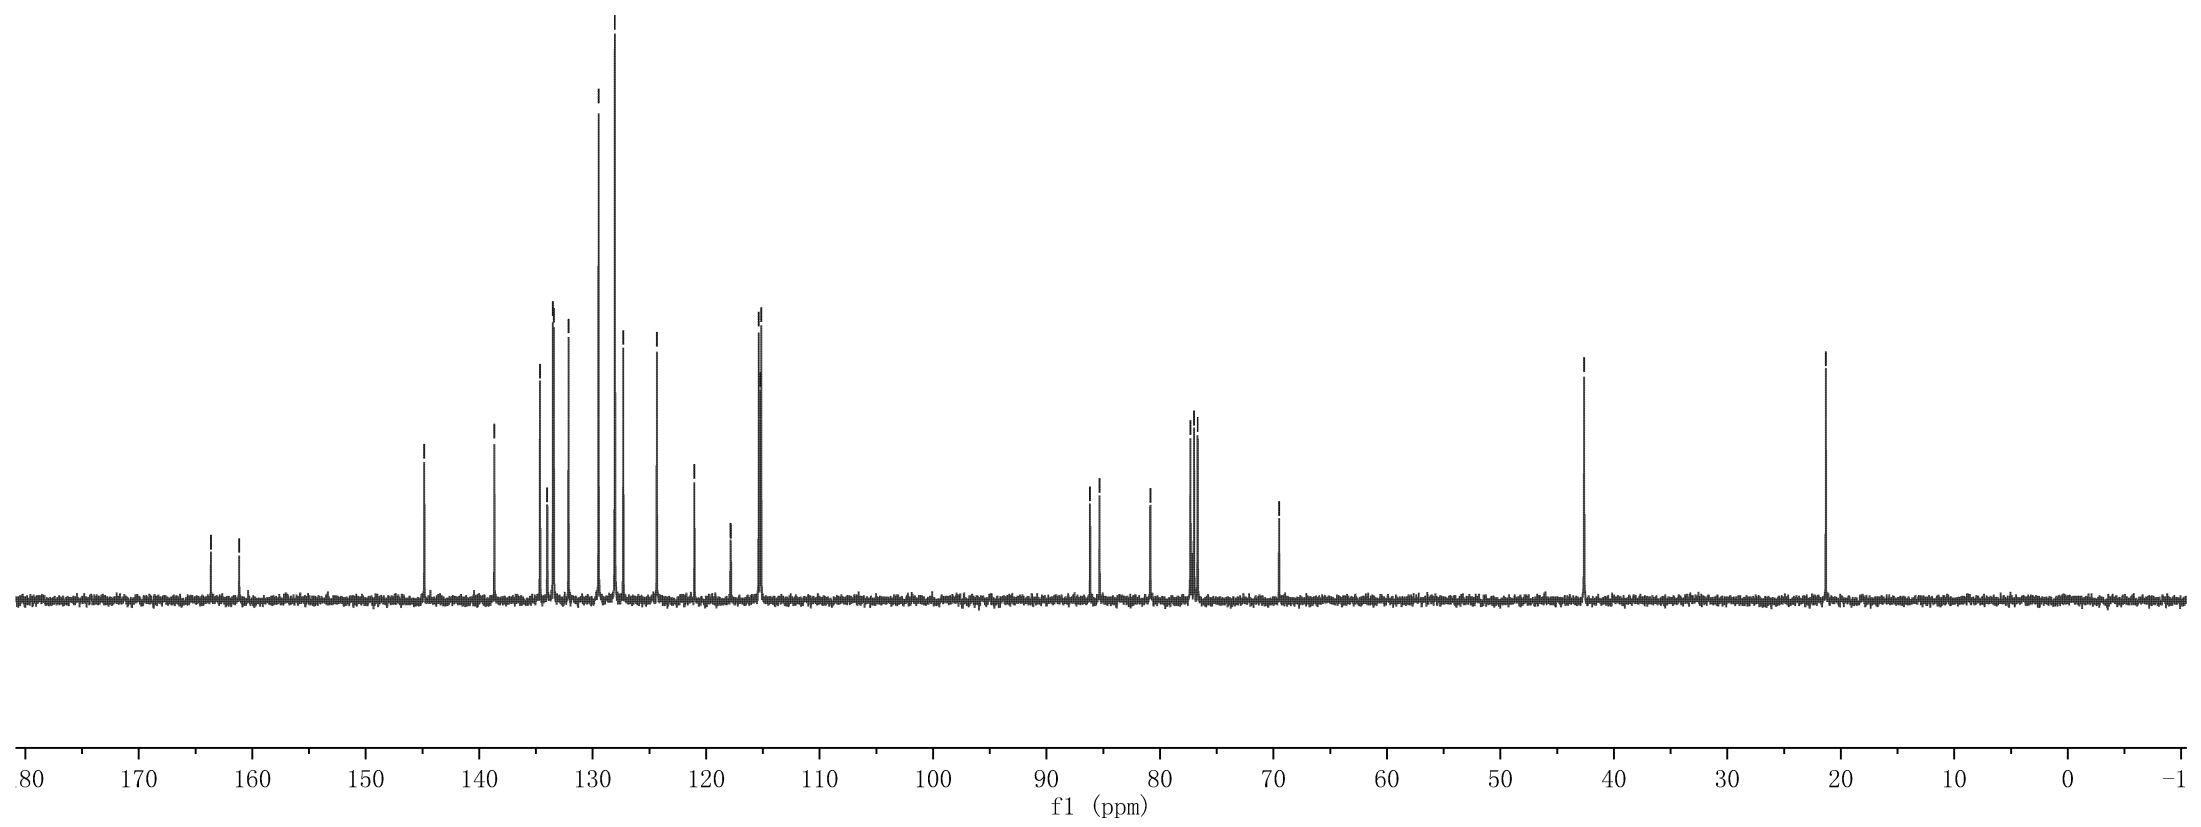

| Parameter                | Value               |
|--------------------------|---------------------|
| 1 Title                  | scy-15-1h-1         |
| 2 Origin                 | Bruker BioSpin GmbH |
| 3 Solvent                | CDCl3               |
| 4 Temperature            | 295.6               |
| 5 Number of Scans        | 16                  |
| 6 Acquisition Time       | 0.7340              |
| 7 Acquisition Date       | 2022-01-13T17:31:53 |
| 8 Spectrometer Frequency | 376.31              |
| 9 Spectral Width         | 89285.7             |

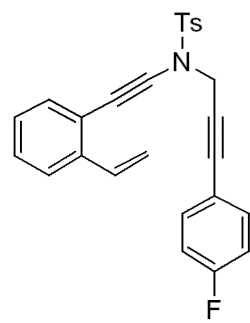

**1h**

69.101

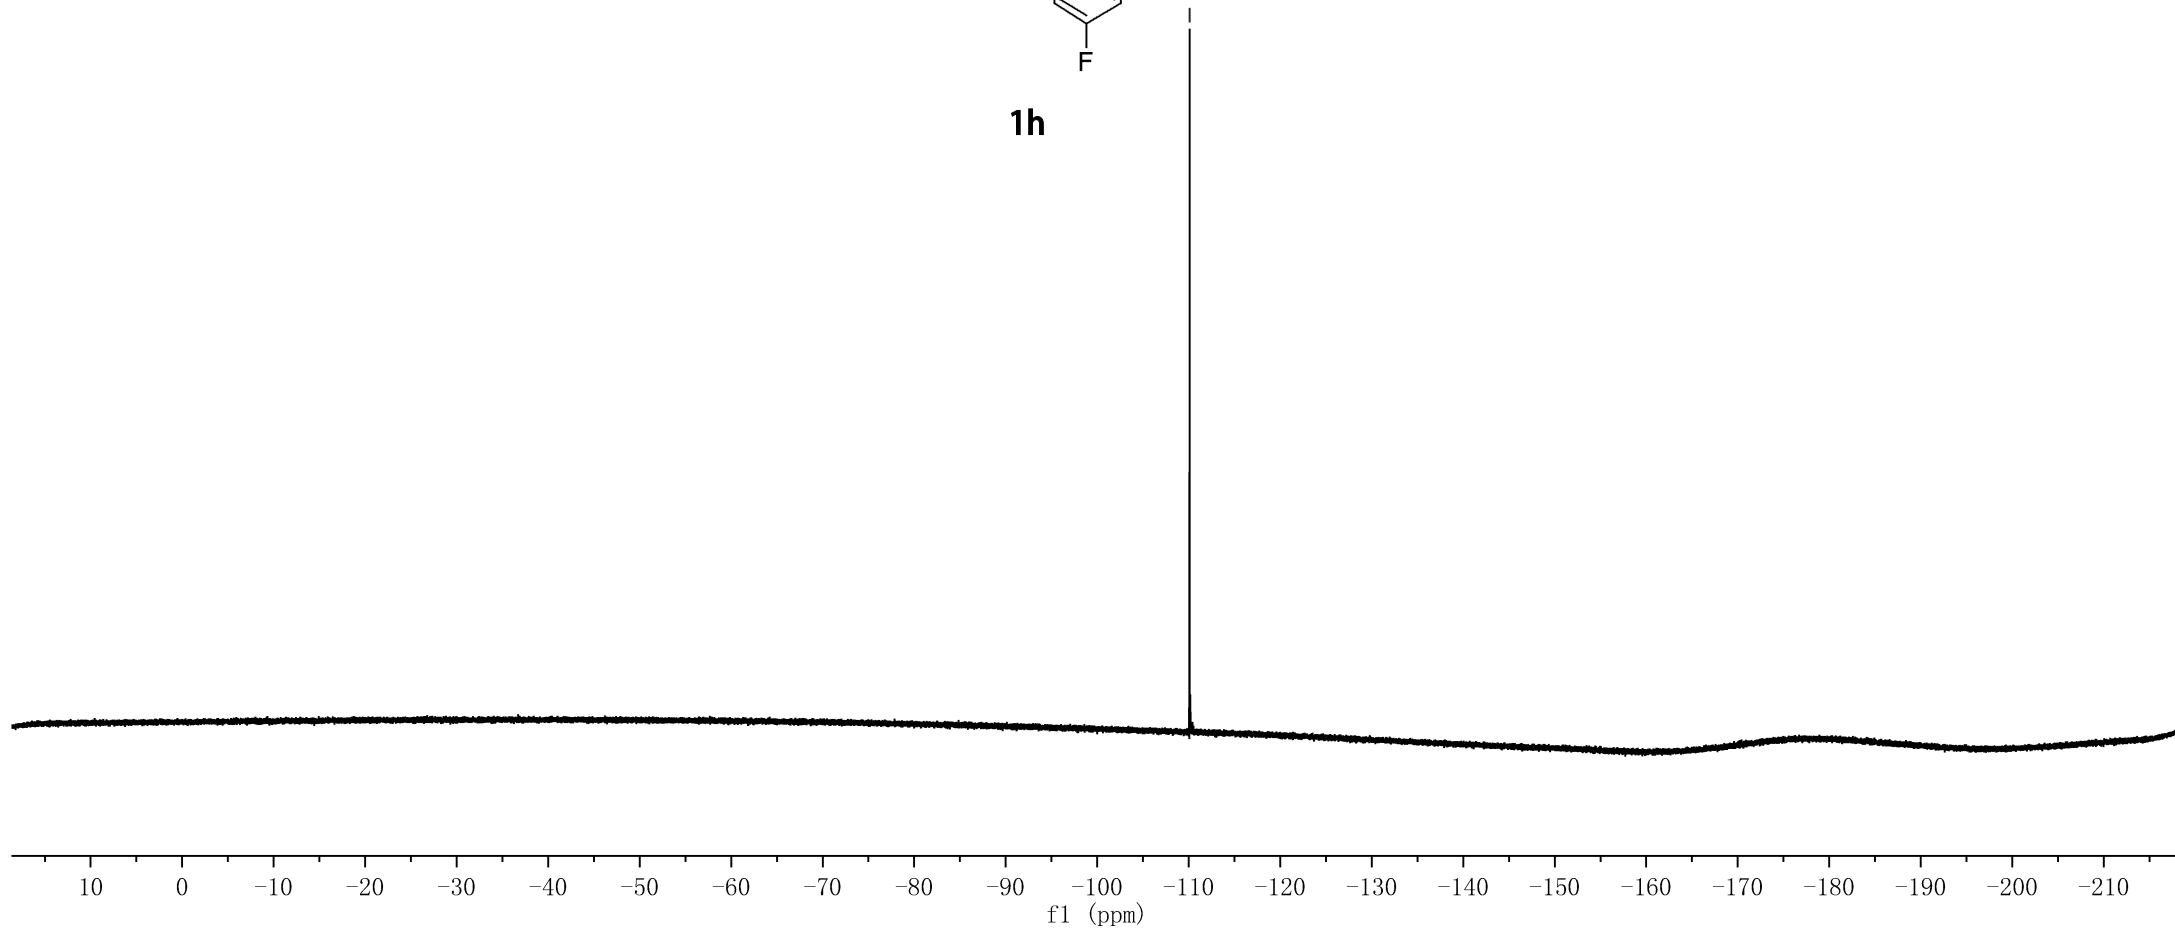



7.910  
7.891  
7.533  
7.513  
7.386  
7.367  
7.263  
7.243  
7.215  
7.194  
7.161  
7.083  
7.064

5.751  
5.707

5.135  
5.107

4.555

2.329

| Parameter                | Value               |
|--------------------------|---------------------|
| 1 Title                  | HFL-3-239-H         |
| 2 Origin                 | Bruker BioSpin GmbH |
| 3 Solvent                | CDC13               |
| 4 Temperature            | 295.5               |
| 5 Number of Scans        | 10                  |
| 6 Acquisition Time       | 3.9846              |
| 7 Acquisition Date       | 2018-03-16T11:12:58 |
| 8 Spectrometer Frequency | 400.03              |
| 9 Spectral Width         | 8223.7              |

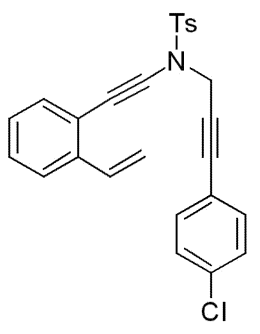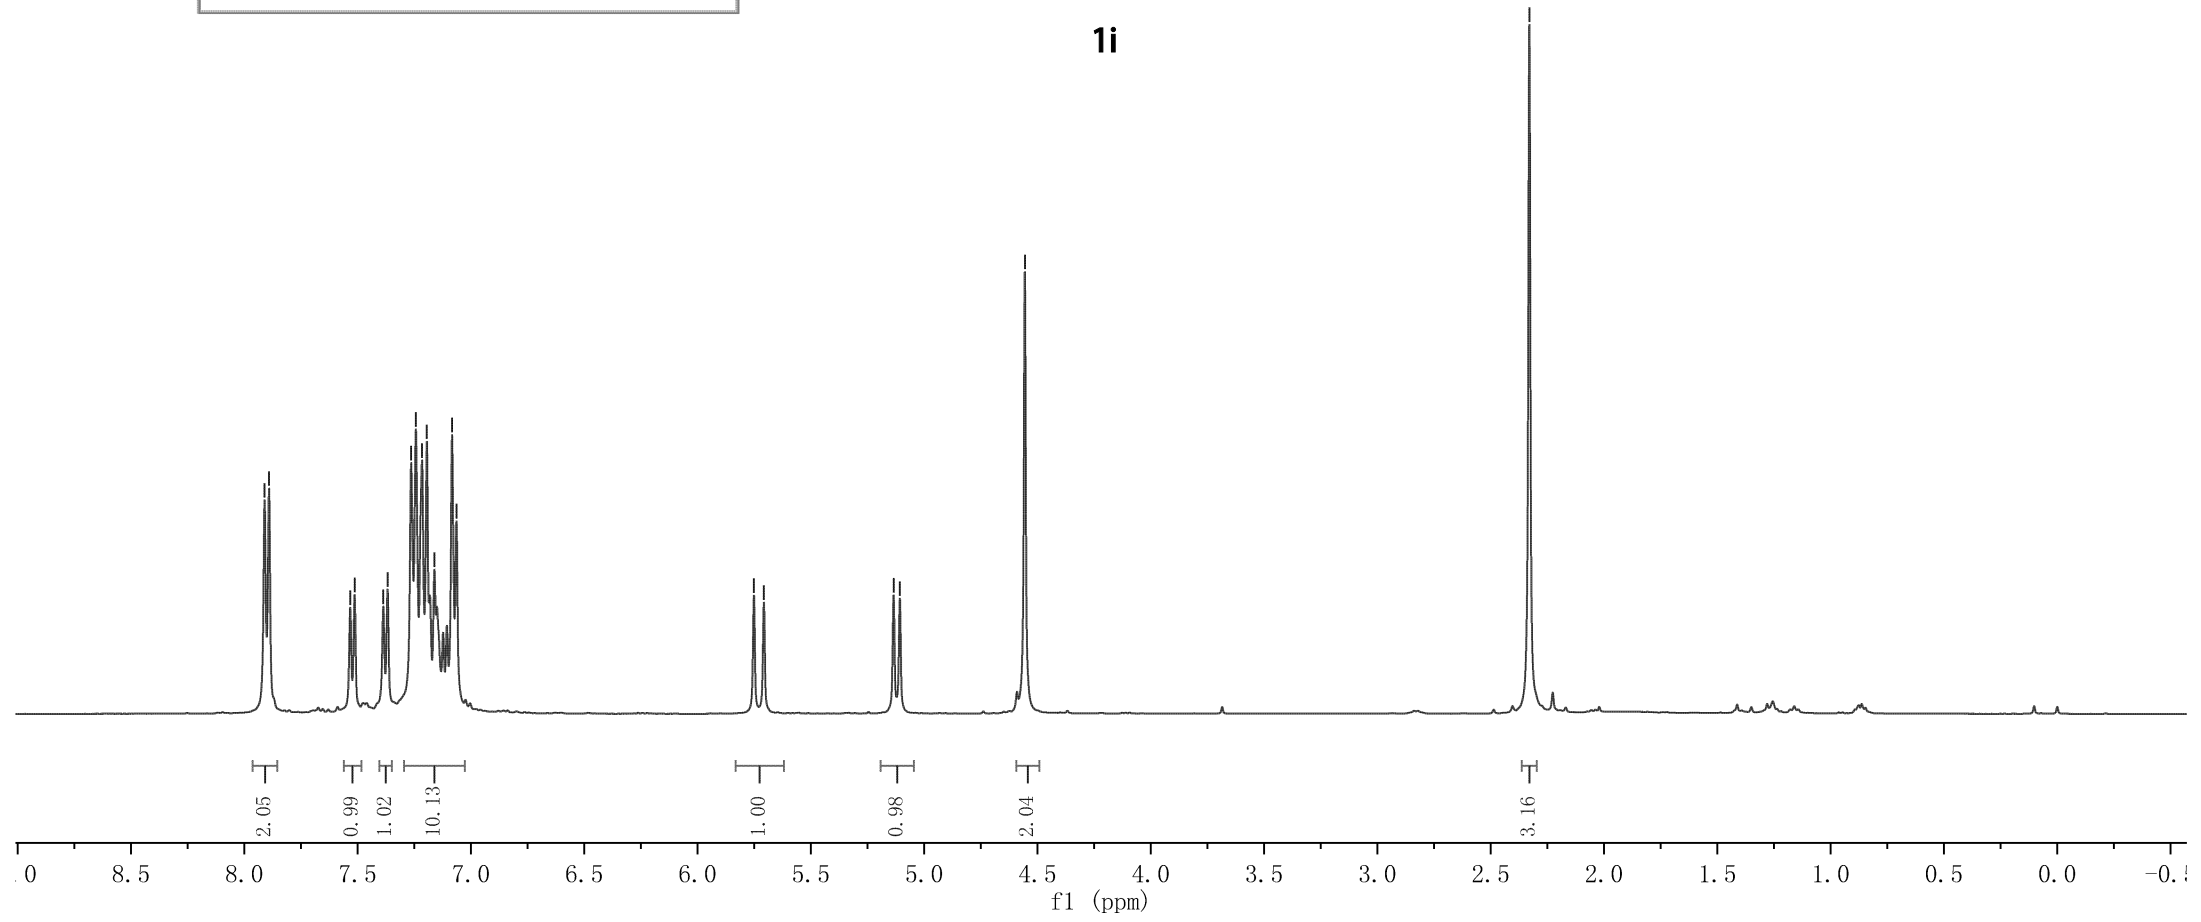

144.88  
138.75  
134.71  
134.59  
132.78  
132.22  
129.54  
128.37  
128.14  
128.10  
127.35  
124.41  
121.08  
119.31

86.12  
85.31  
82.20  
77.32  
77.00  
76.68  
69.59

42.69

21.44

| Parameter                | Value               |
|--------------------------|---------------------|
| 1 Title                  | HFL-3-239-C         |
| 2 Origin                 | Bruker BioSpin GmbH |
| 3 Solvent                | CDC13               |
| 4 Temperature            | 295.6               |
| 5 Number of Scans        | 22                  |
| 6 Acquisition Time       | 1.3631              |
| 7 Acquisition Date       | 2018-03-16T11:16:03 |
| 8 Spectrometer Frequency | 100.59              |
| 9 Spectral Width         | 24038.5             |

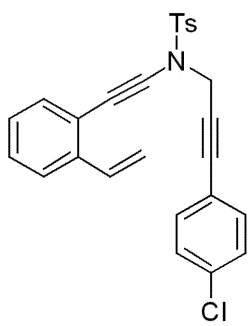

**1i**

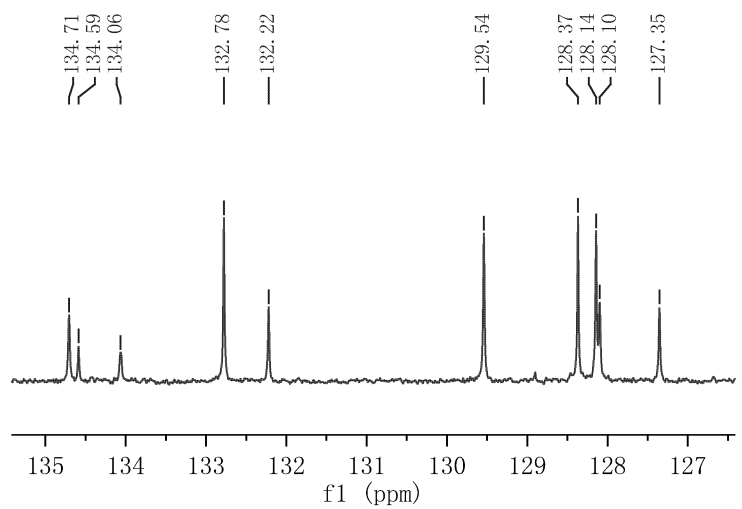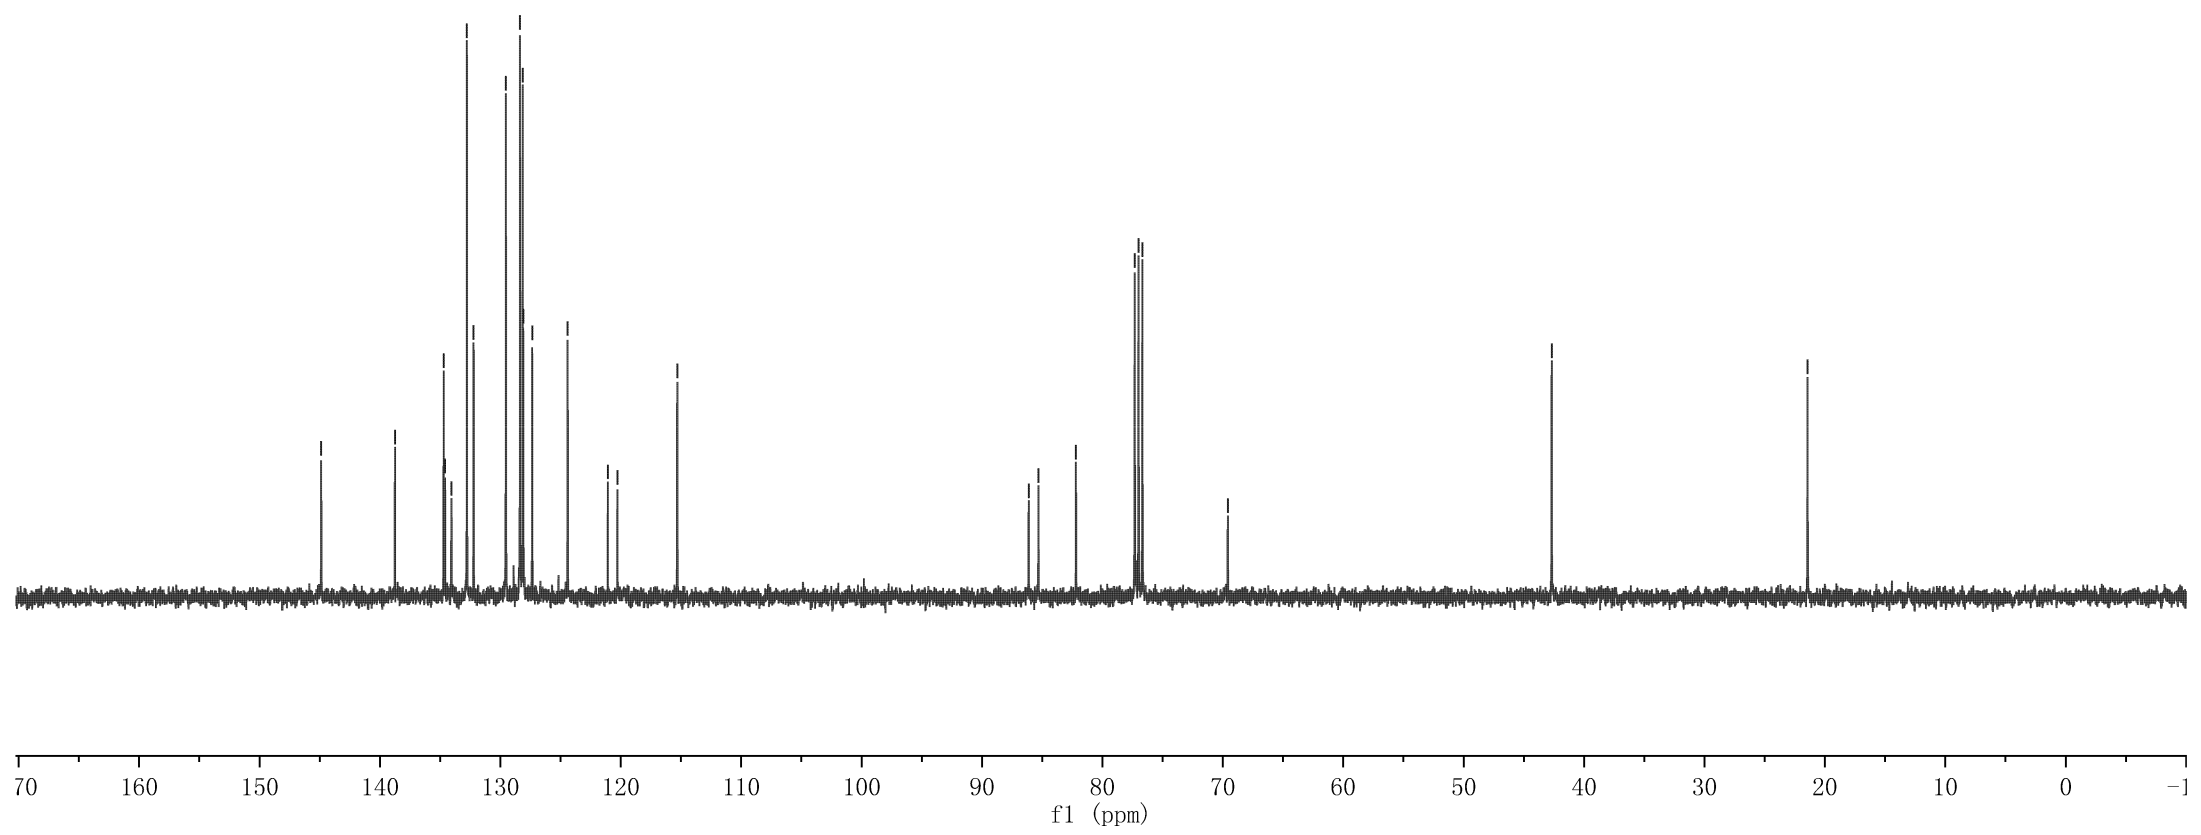

7.910  
7.889  
7.534  
7.515  
7.375  
7.354  
7.268  
7.247  
7.231  
7.182  
7.144  
7.117  
7.073  
7.020  
6.999

5.752  
5.708

5.138  
5.111

4.551

2.337

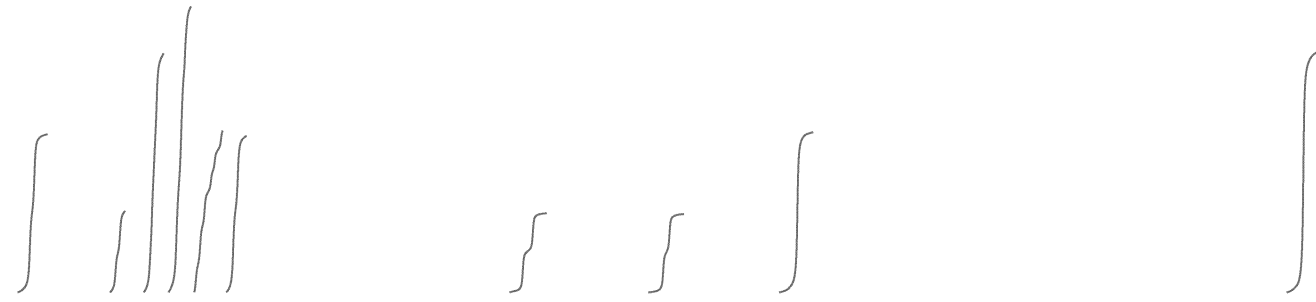

| Parameter                | Value               |
|--------------------------|---------------------|
| 1 Title                  | hfl-4-23-h          |
| 2 Origin                 | Bruker BioSpin GmbH |
| 3 Solvent                | CDC13               |
| 4 Temperature            | 295.6               |
| 5 Number of Scans        | 20                  |
| 6 Acquisition Time       | 3.9846              |
| 7 Acquisition Date       | 2018-03-21T09:55:39 |
| 8 Spectrometer Frequency | 400.13              |
| 9 Spectral Width         | 8223.7              |

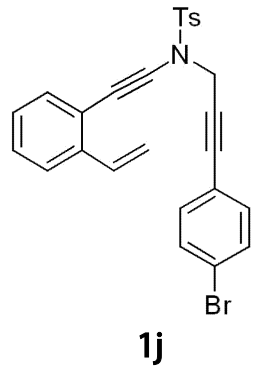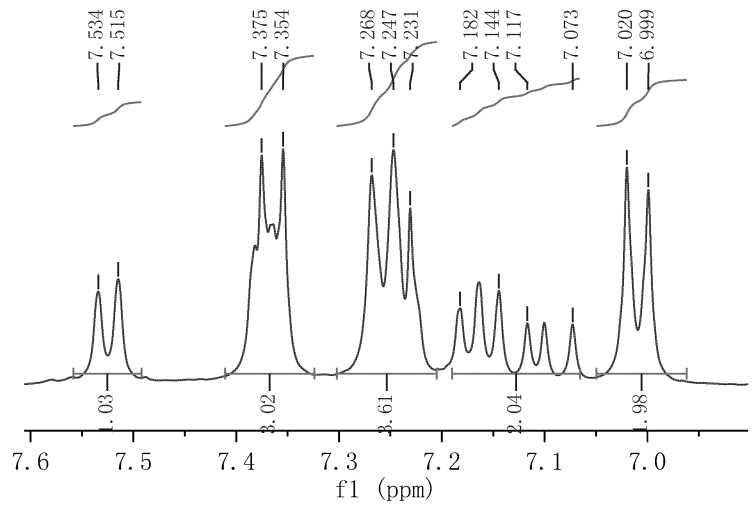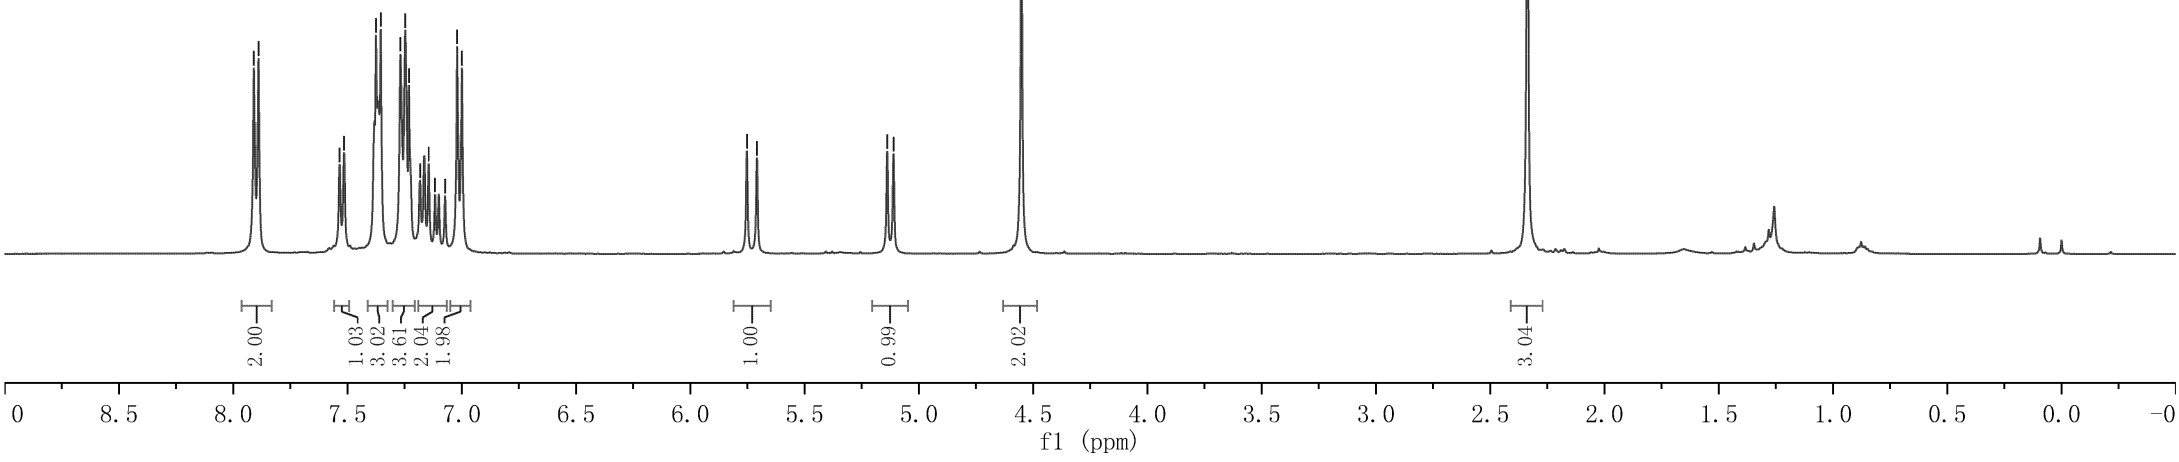

144.88  
138.80  
134.76  
132.99  
132.25  
131.33  
129.56  
128.17  
128.11  
127.37  
124.45  
122.87  
121.12  
119.58  
115.33

86.15  
85.41  
82.43  
77.32  
77.00  
76.68  
69.65

42.73

21.47

| Parameter                | Value               |
|--------------------------|---------------------|
| 1 Title                  | hfl-4-23-c          |
| 2 Origin                 | Bruker BioSpin GmbH |
| 3 Solvent                | CDC13               |
| 4 Temperature            | 296.3               |
| 5 Number of Scans        | 45                  |
| 6 Acquisition Time       | 1.3631              |
| 7 Acquisition Date       | 2018-03-21T10:01:06 |
| 8 Spectrometer Frequency | 100.61              |
| 9 Spectral Width         | 24038.5             |

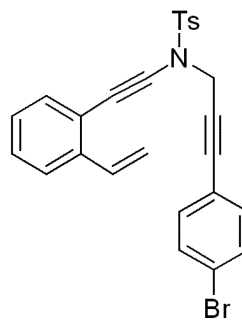

1j

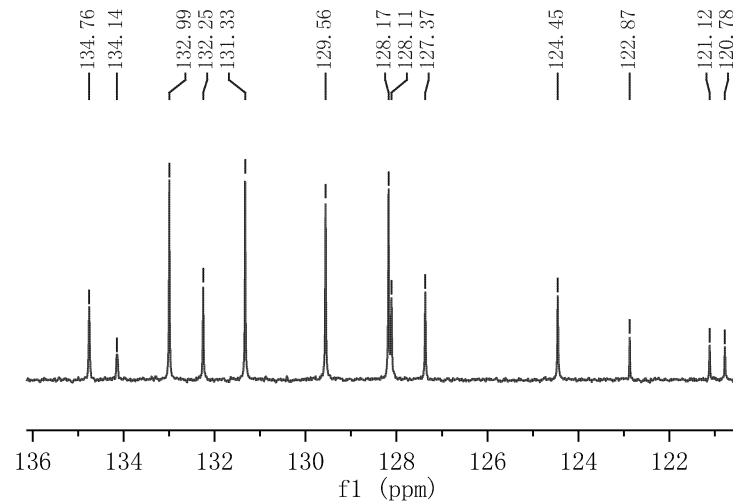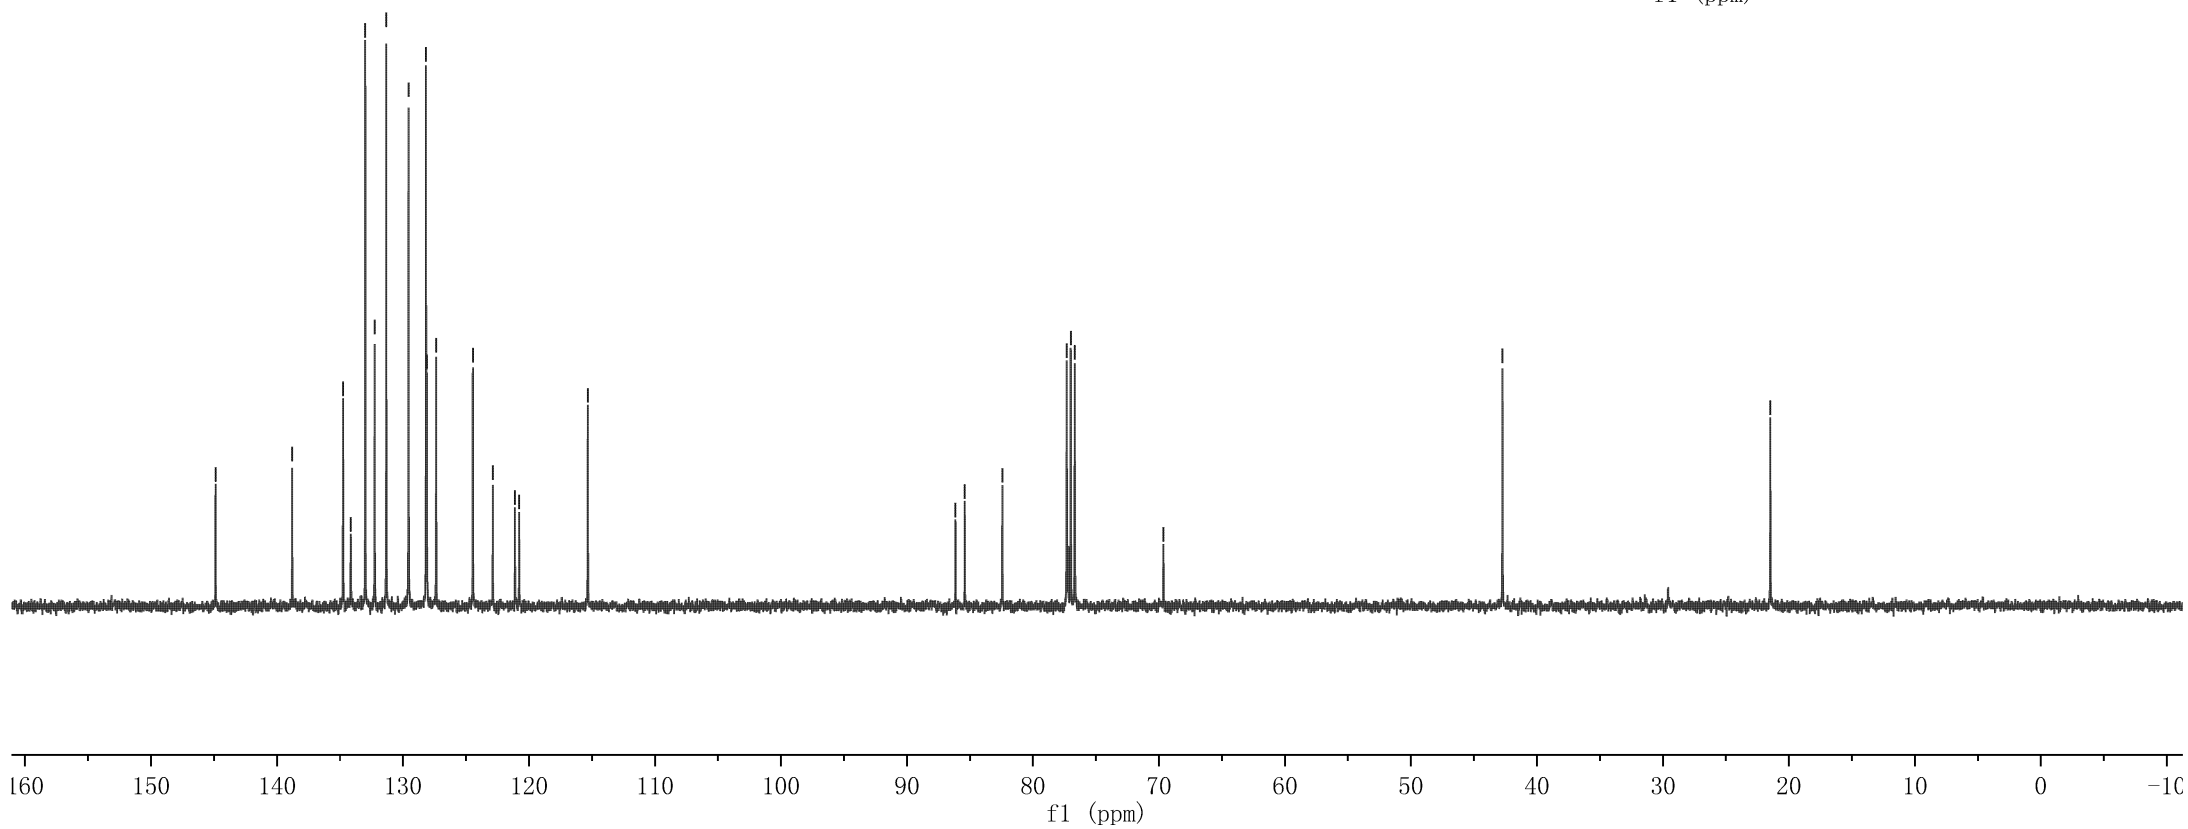

| Parameter                | Value               |
|--------------------------|---------------------|
| 1 Title                  | hf1-4-31-h          |
| 2 Origin                 | Bruker BioSpin GmbH |
| 3 Solvent                | CDC13               |
| 4 Temperature            | 295.8               |
| 5 Number of Scans        | 3                   |
| 6 Acquisition Time       | 3.9846              |
| 7 Acquisition Date       | 2018-03-21T16:02:49 |
| 8 Spectrometer Frequency | 400.13              |
| 9 Spectral Width         | 8223.7              |

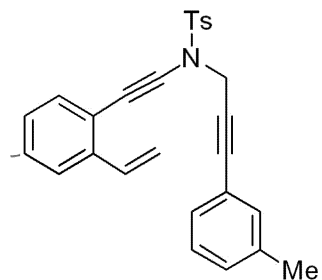

1k

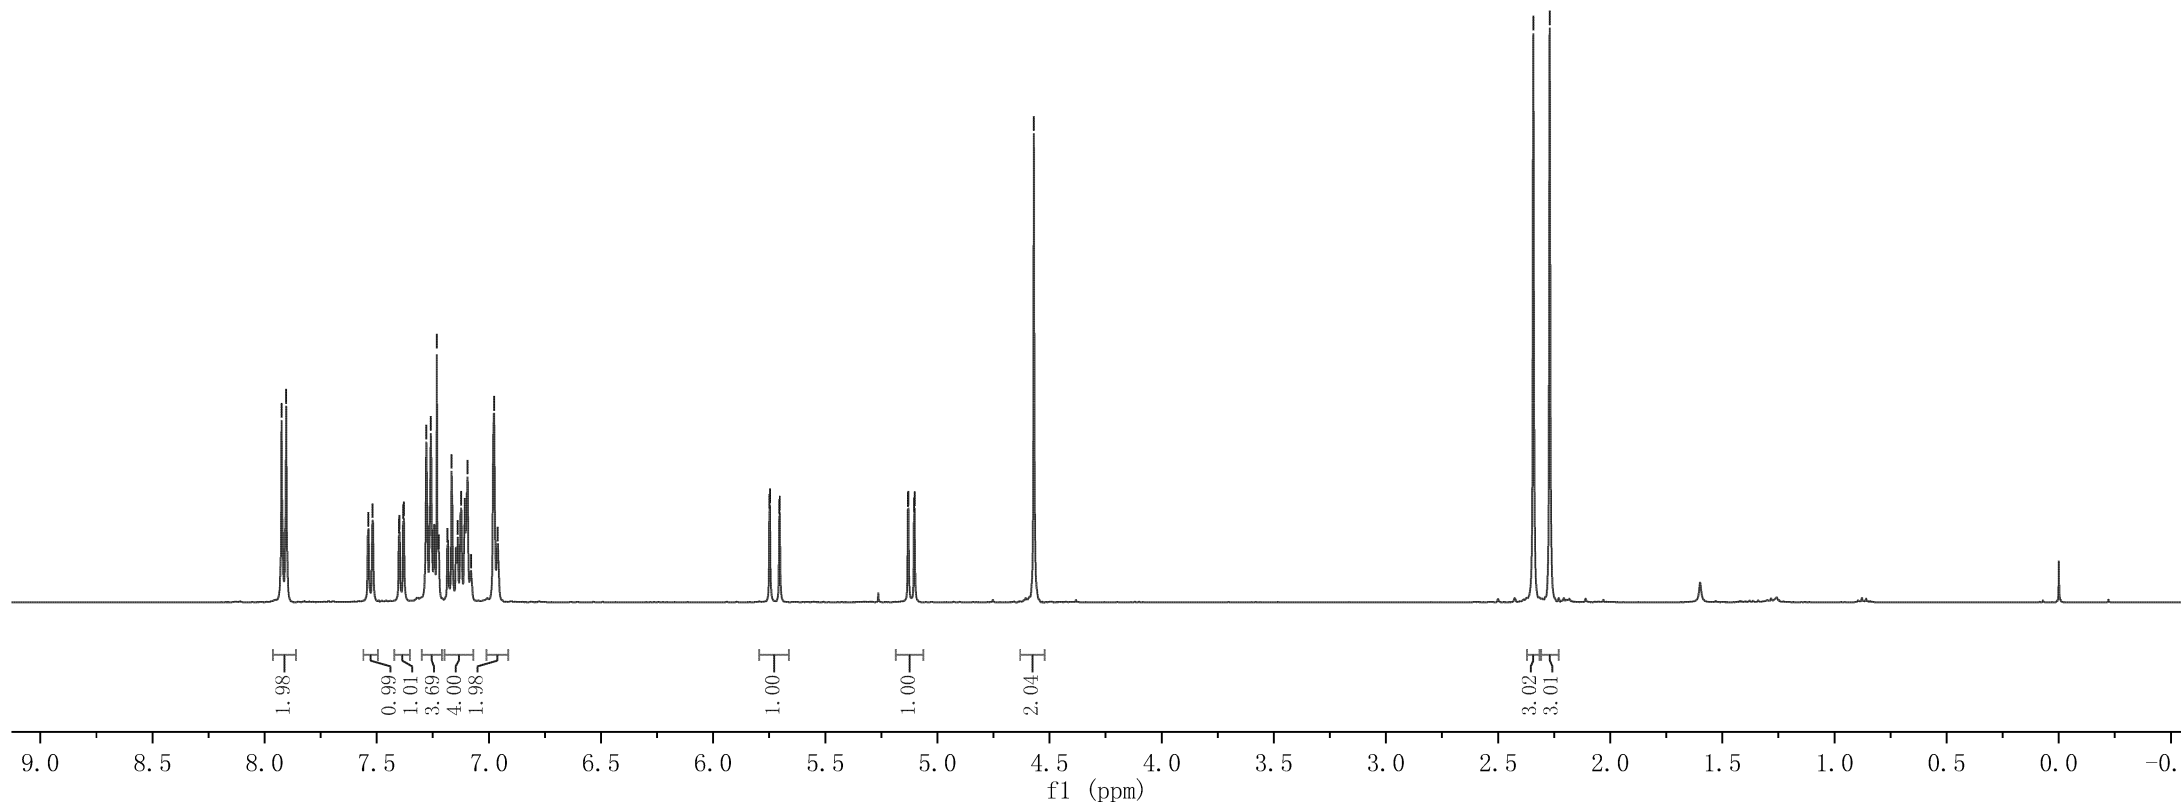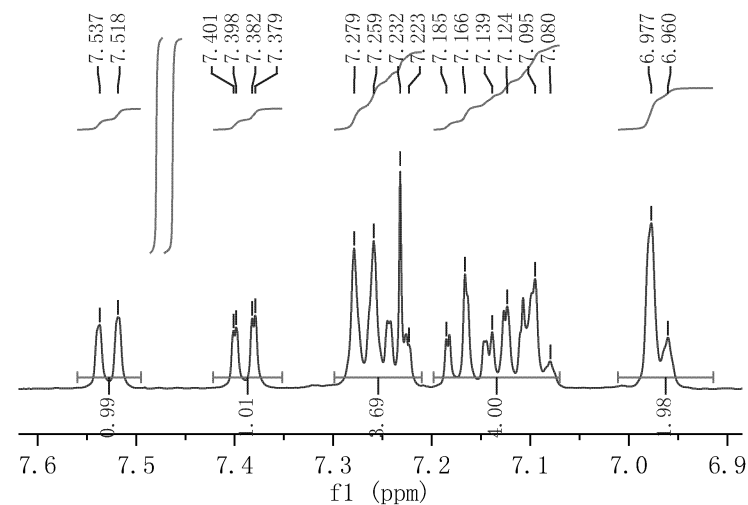

7.924  
7.904  
7.537  
7.518  
7.401  
7.398  
7.382  
7.379  
7.279  
7.259  
7.232  
7.223  
7.185  
7.166  
7.139  
7.124  
7.095  
7.080  
6.977  
6.960

5.749  
5.747  
5.705  
5.703

5.132  
5.129  
5.104  
5.102

4.570

2.343  
2.270

7.537  
7.518  
7.401  
7.398  
7.382  
7.379  
7.279  
7.259  
7.232  
7.223  
7.185  
7.166  
7.139  
7.124  
7.095  
7.080  
6.977  
6.960

144.82  
 138.89  
 137.72  
 134.88  
 132.35  
 132.19  
 129.59  
 129.45  
 128.70  
 128.24  
 128.06  
 127.97  
 127.35  
 124.43  
 121.70  
 115.27

86.75  
 86.28  
 80.72  
 77.32  
 77.00  
 76.68  
 69.60

42.87

21.51  
 21.09

| Parameter                | Value               |
|--------------------------|---------------------|
| 1 Title                  | hfl-4-31-c          |
| 2 Origin                 | Bruker BioSpin GmbH |
| 3 Solvent                | CDC13               |
| 4 Temperature            | 295.8               |
| 5 Number of Scans        | 22                  |
| 6 Acquisition Time       | 1.3631              |
| 7 Acquisition Date       | 2018-03-21T16:04:43 |
| 8 Spectrometer Frequency | 100.61              |
| 9 Spectral Width         | 24038.5             |

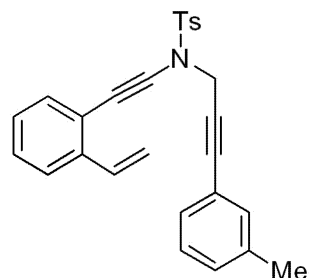

**1k**

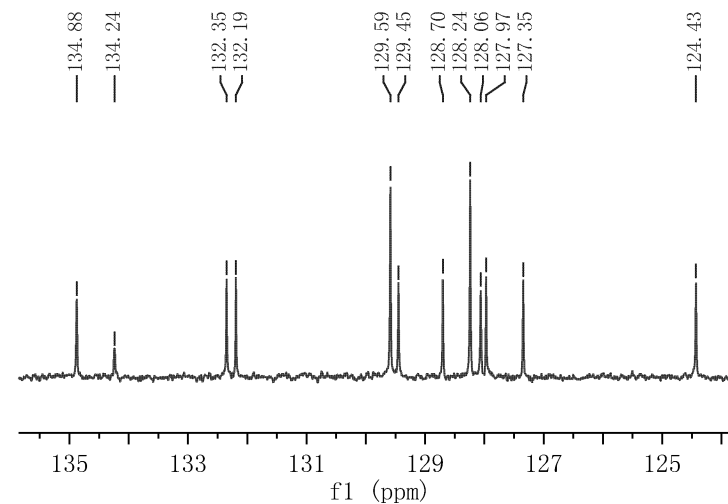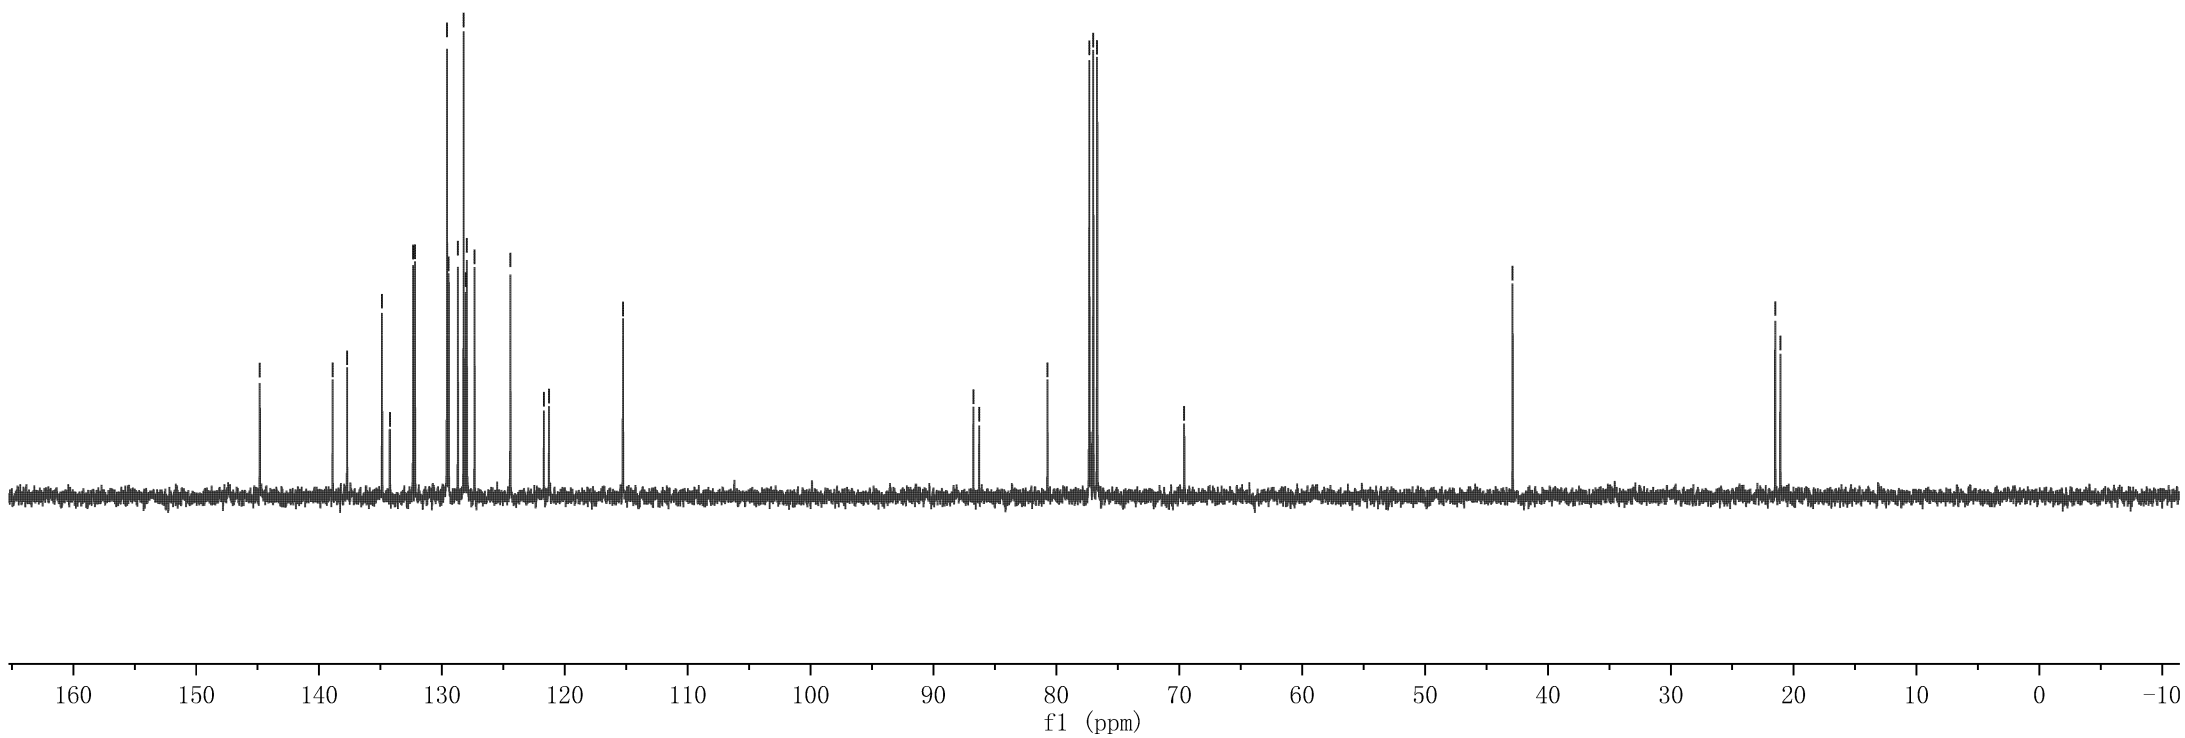

| Parameter                | Value               |
|--------------------------|---------------------|
| 1 Title                  | hf1-4-37-h          |
| 2 Origin                 | Bruker BioSpin GmbH |
| 3 Solvent                | CDC13               |
| 4 Temperature            | 296.0               |
| 5 Number of Scans        | 5                   |
| 6 Acquisition Time       | 3.9846              |
| 7 Acquisition Date       | 2018-03-23T22:04:41 |
| 8 Spectrometer Frequency | 400.13              |
| 9 Spectral Width         | 8223.7              |

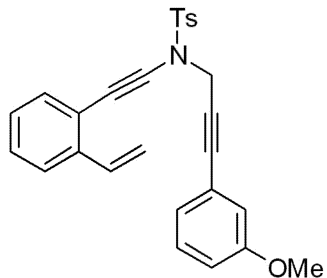

11

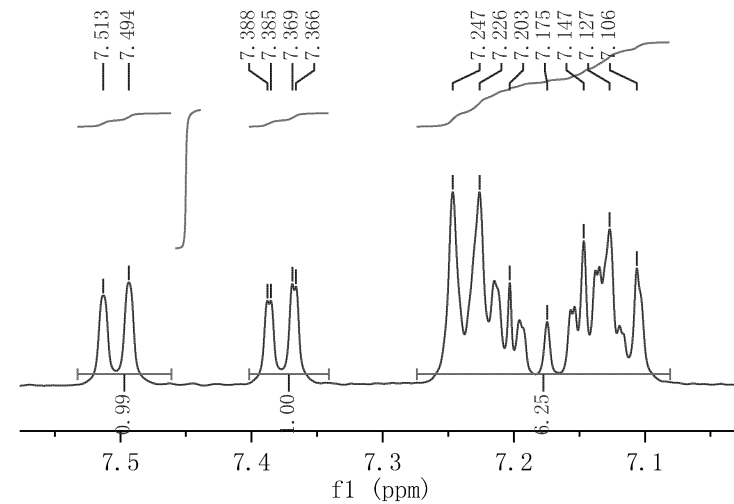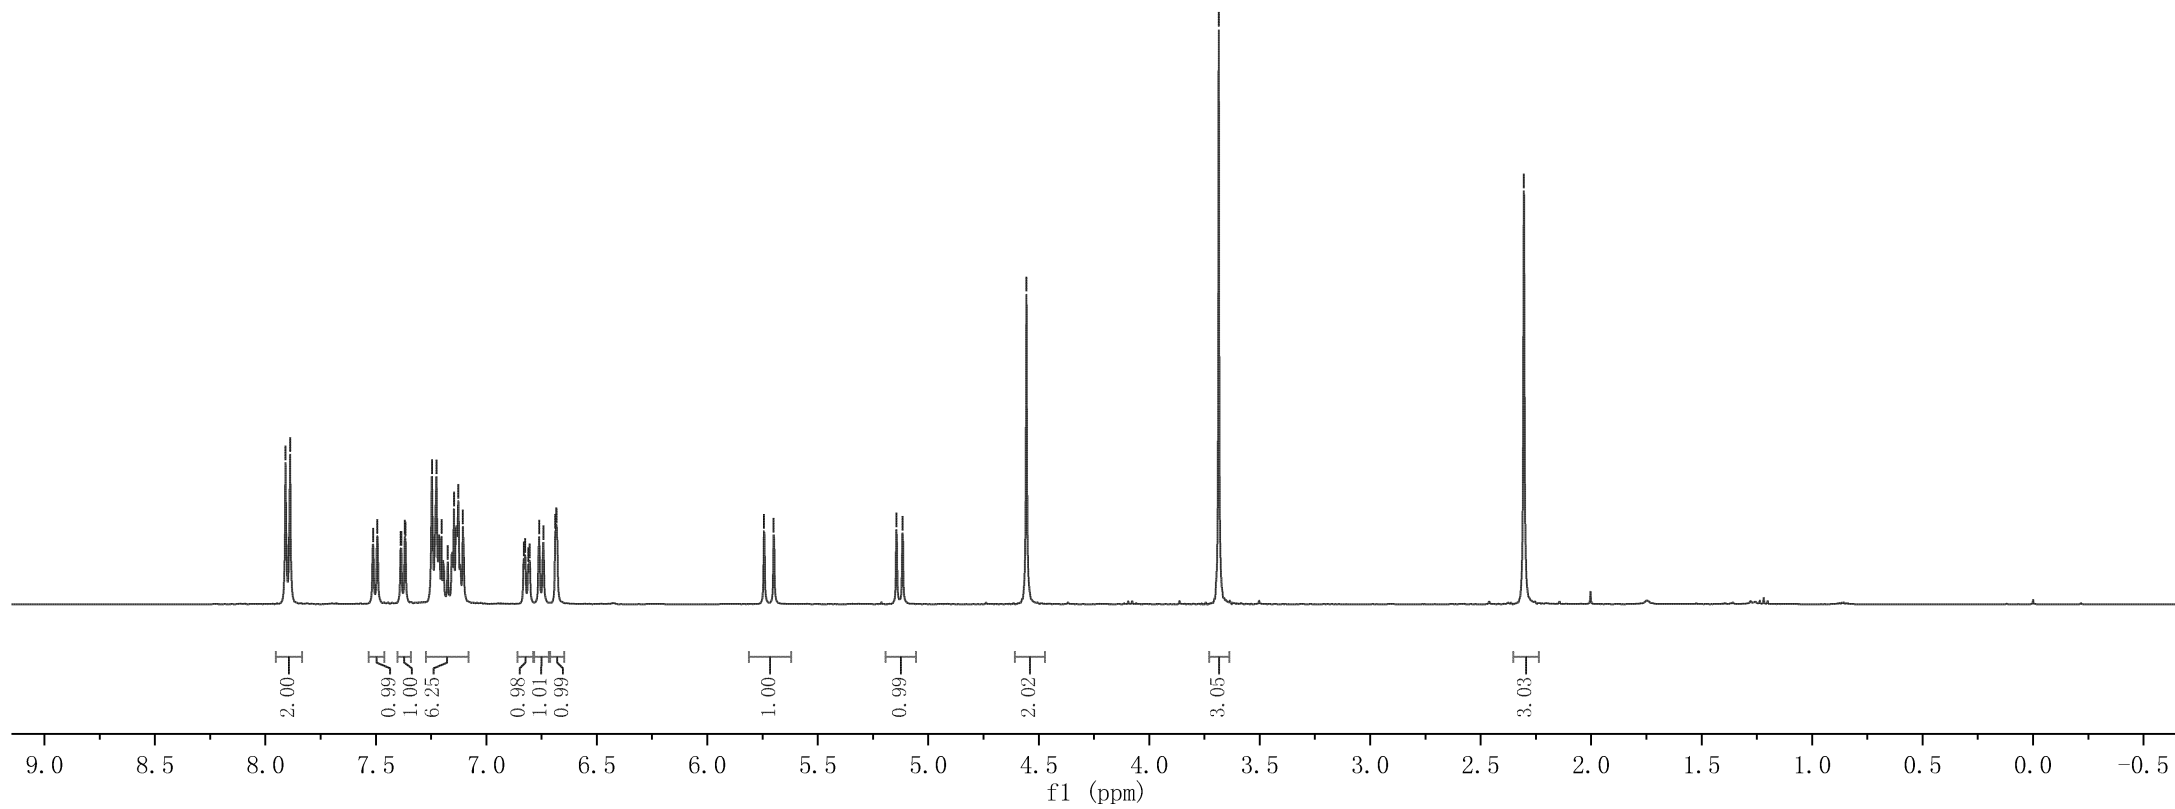

| Parameter                | Value               |
|--------------------------|---------------------|
| 1 Title                  | hfl-4-37-c          |
| 2 Origin                 | Bruker BioSpin GmbH |
| 3 Solvent                | CDC13               |
| 4 Temperature            | 296.1               |
| 5 Number of Scans        | 8                   |
| 6 Acquisition Time       | 1.3631              |
| 7 Acquisition Date       | 2018-03-23T22:06:48 |
| 8 Spectrometer Frequency | 100.61              |
| 9 Spectral Width         | 24038.5             |

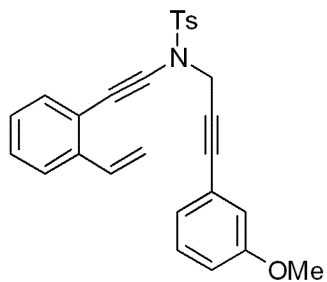

11

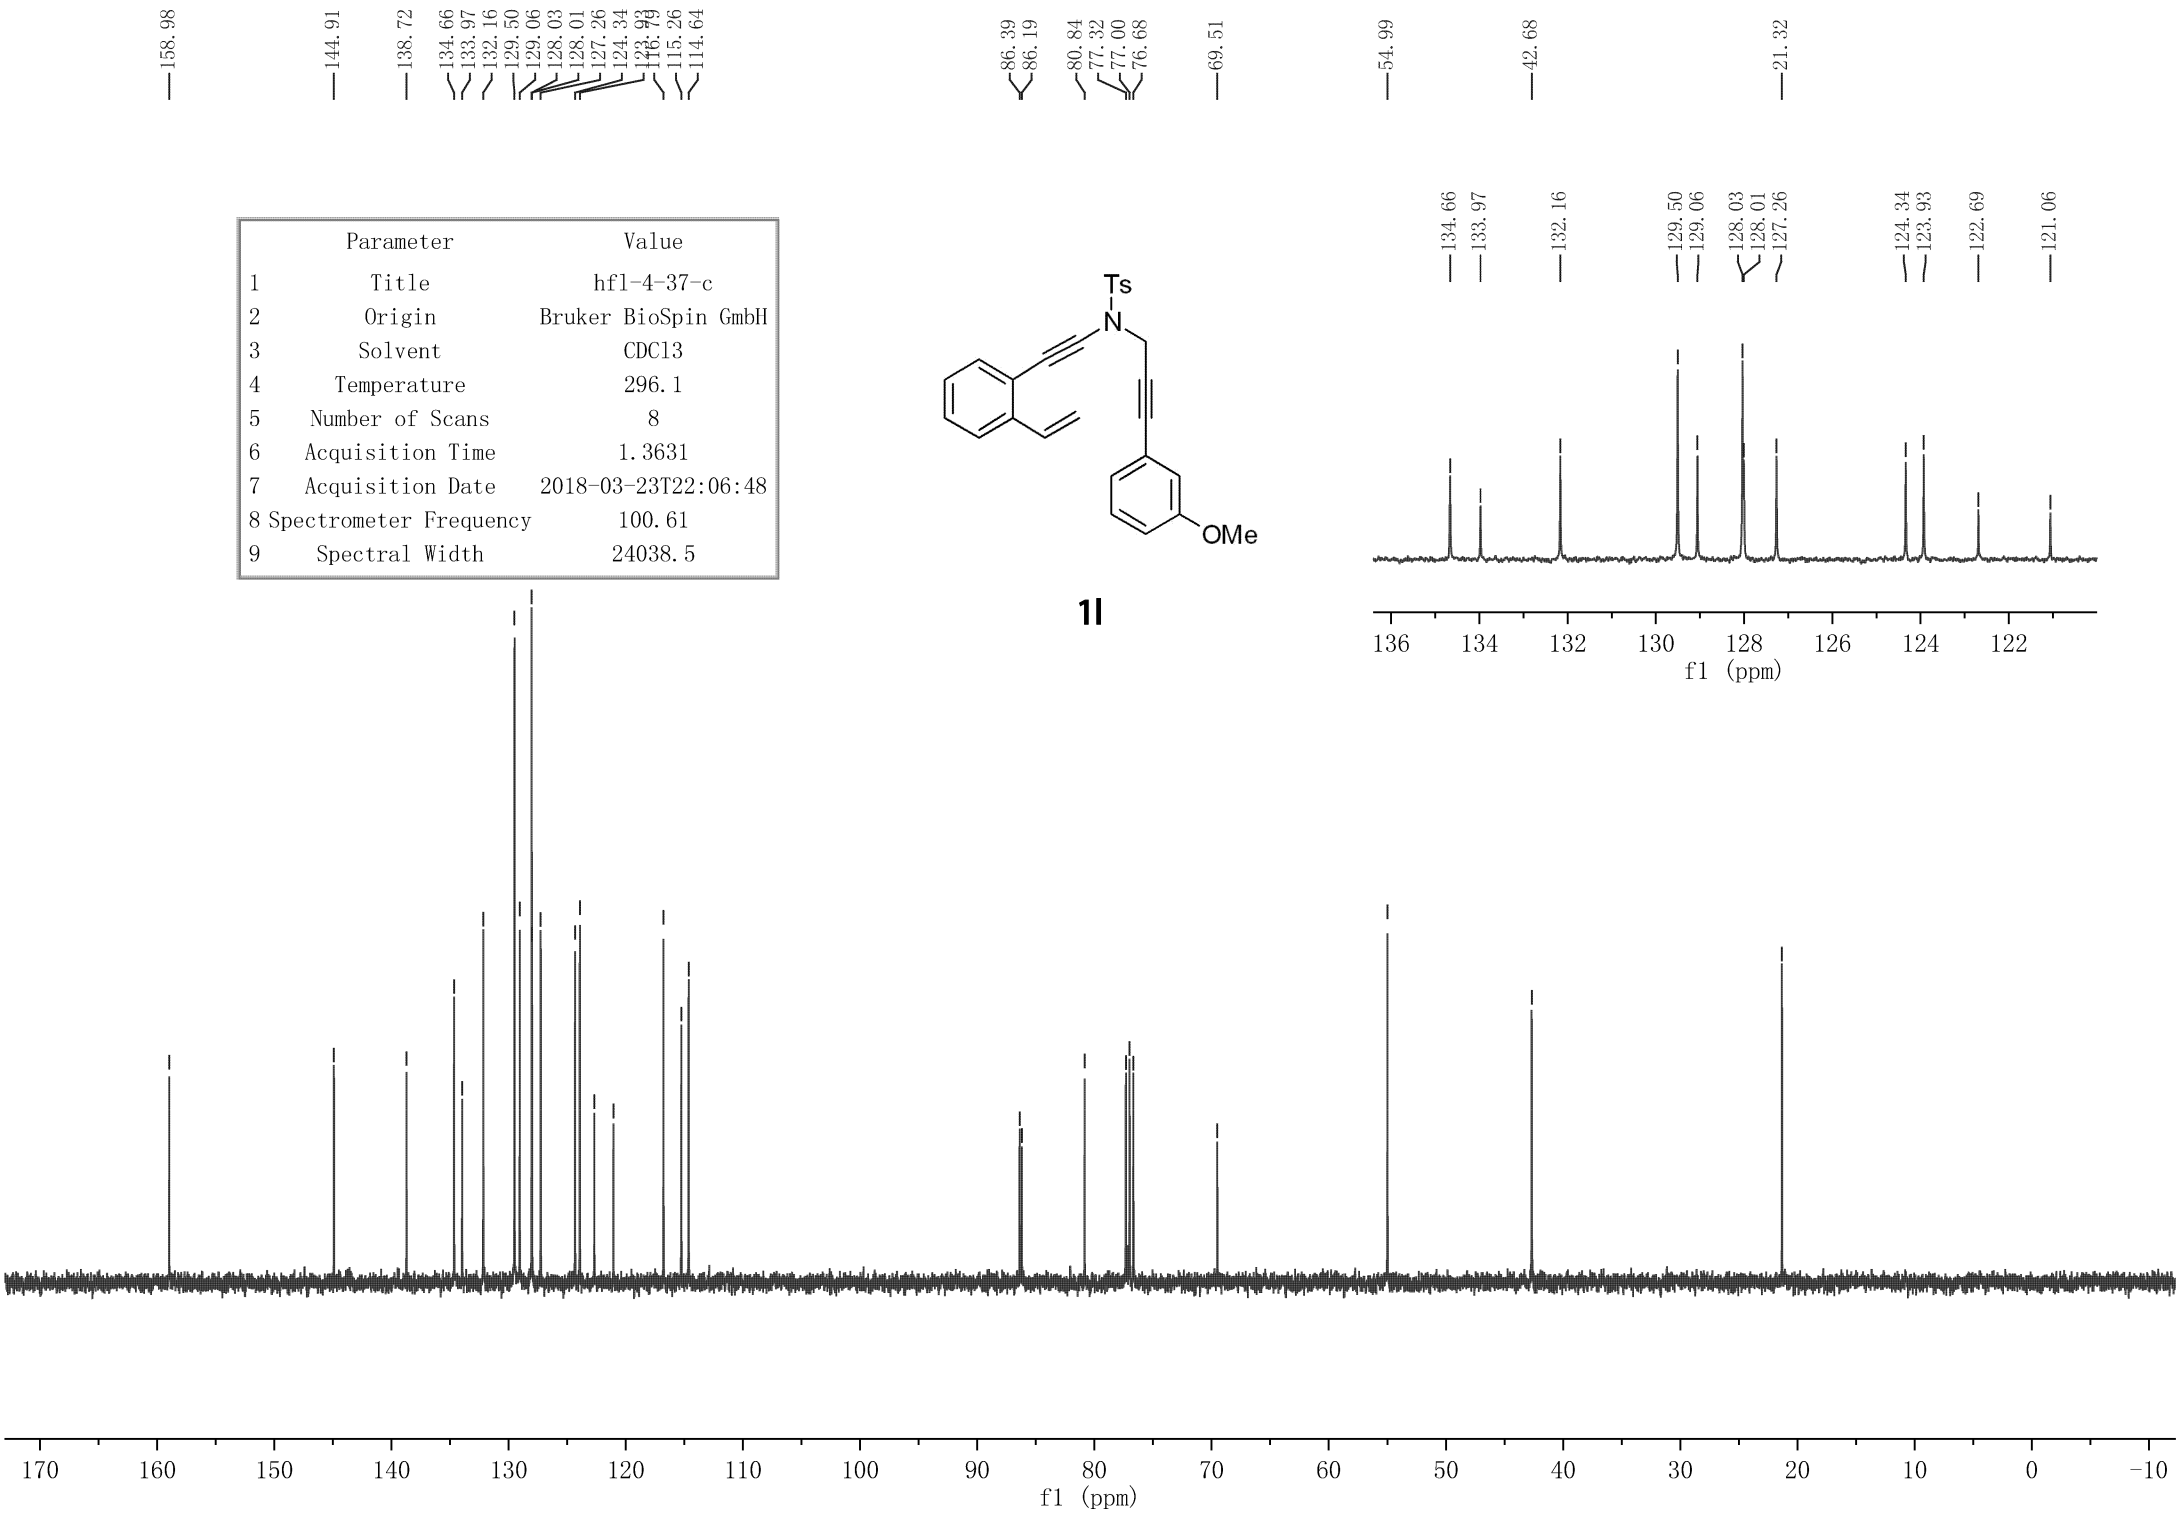



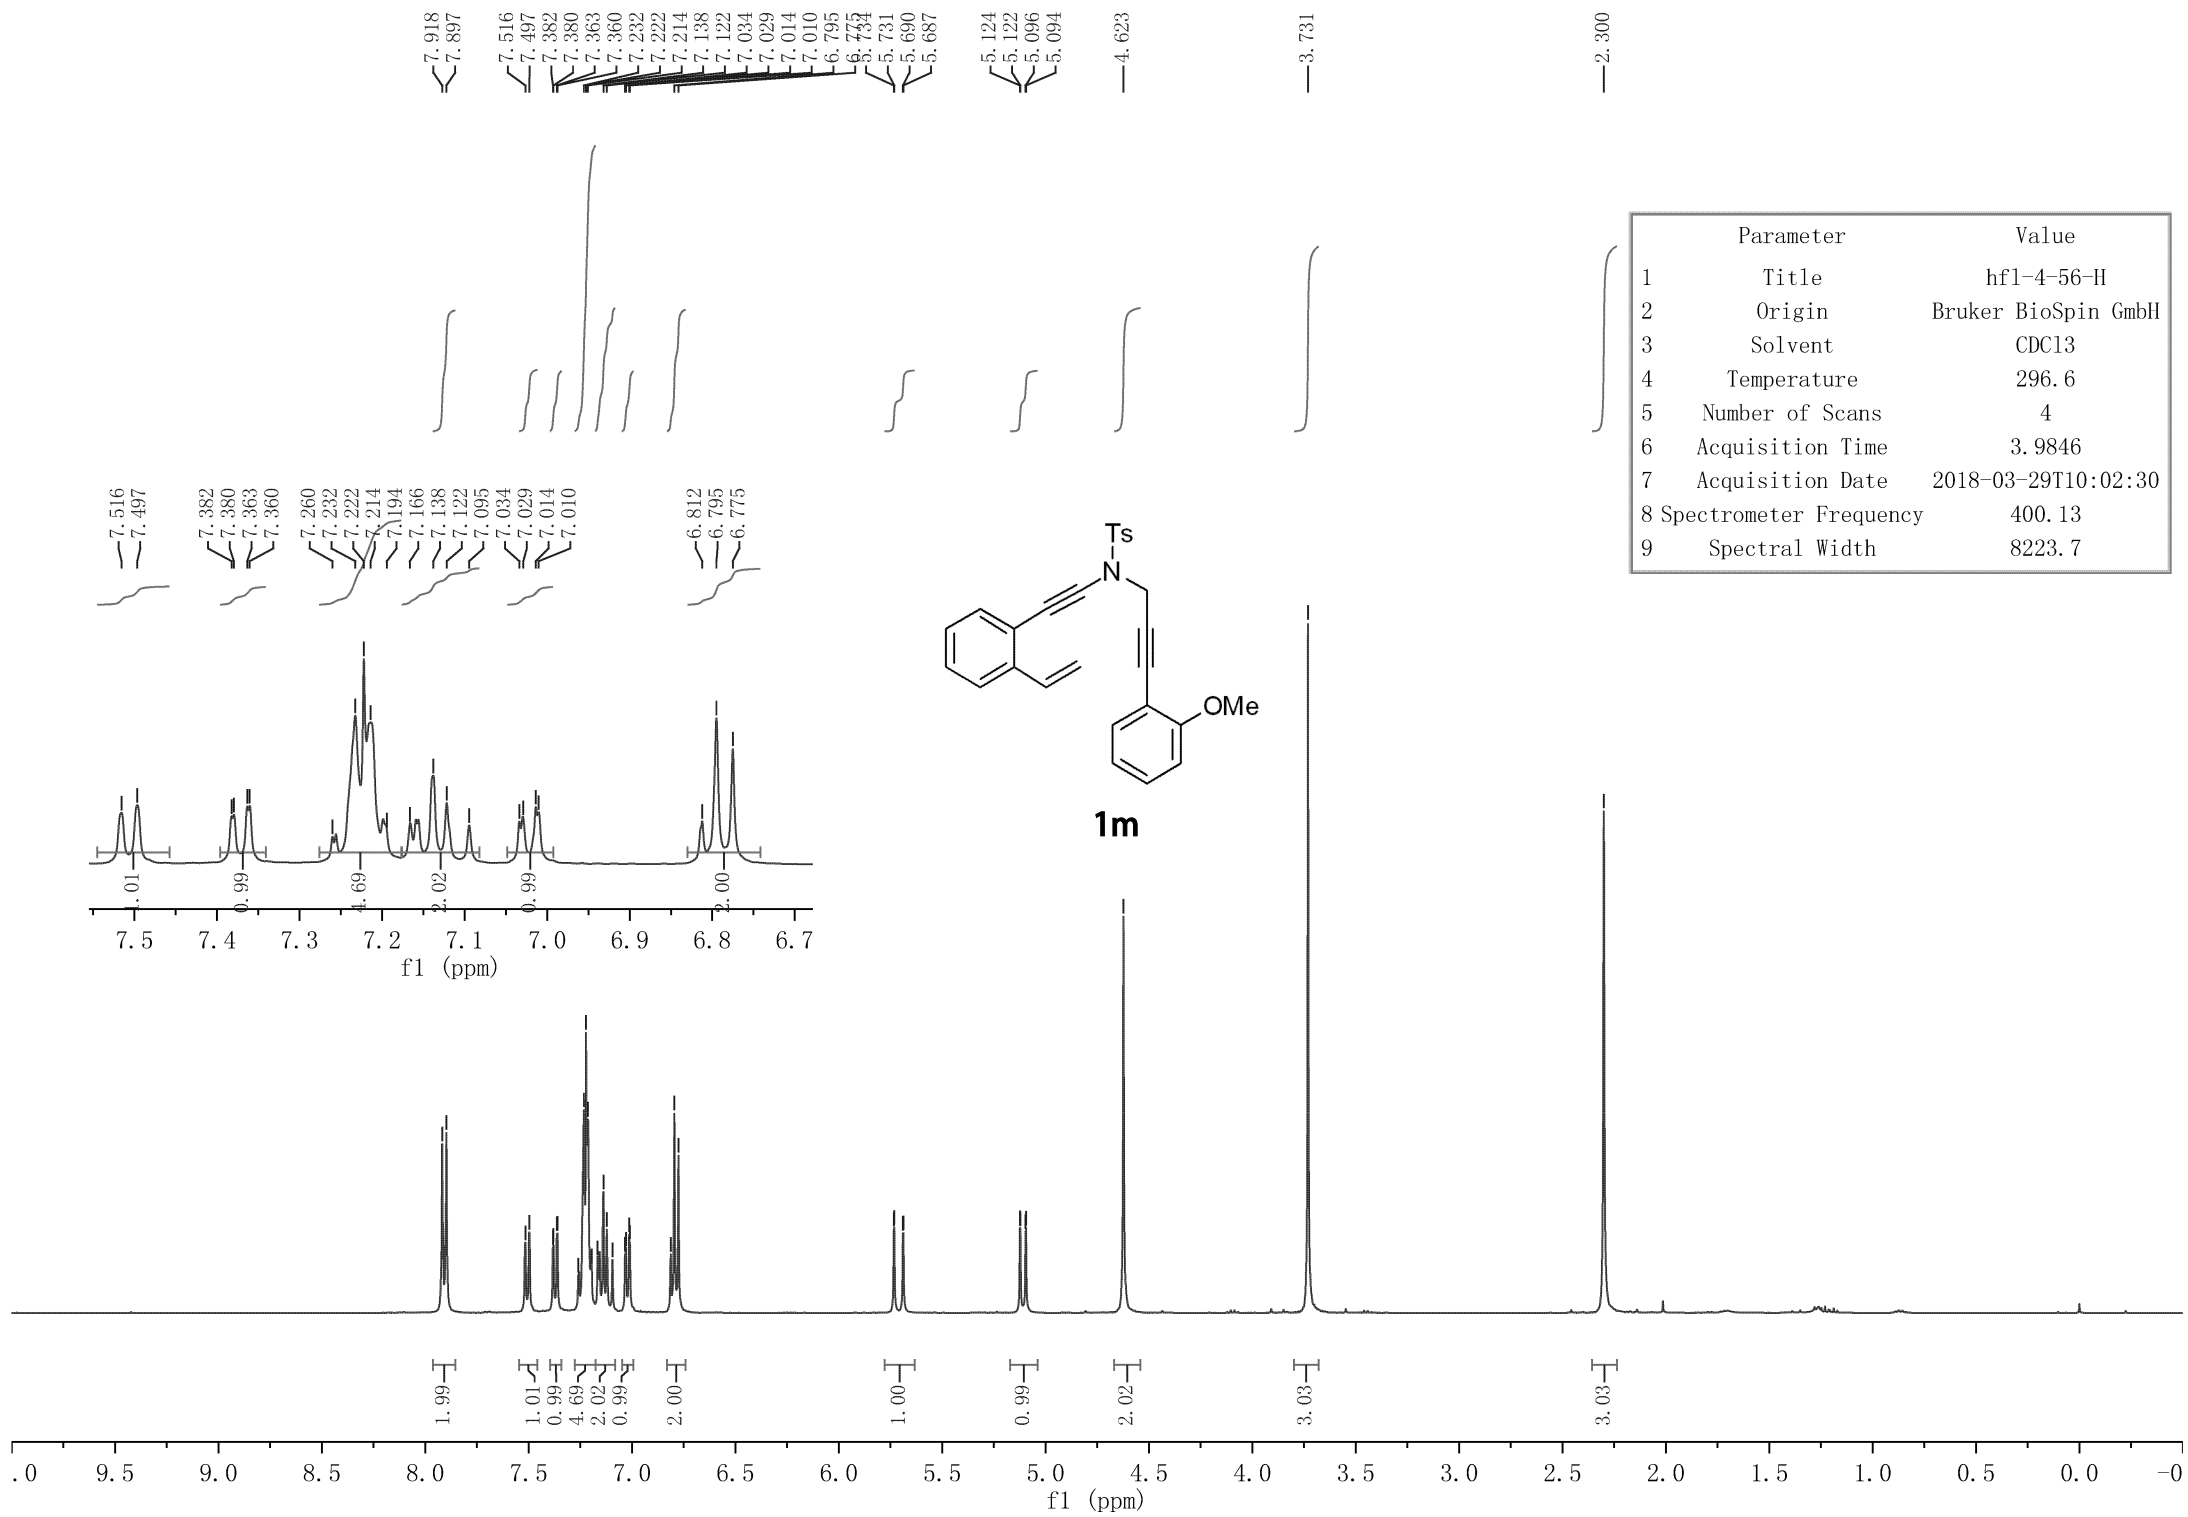

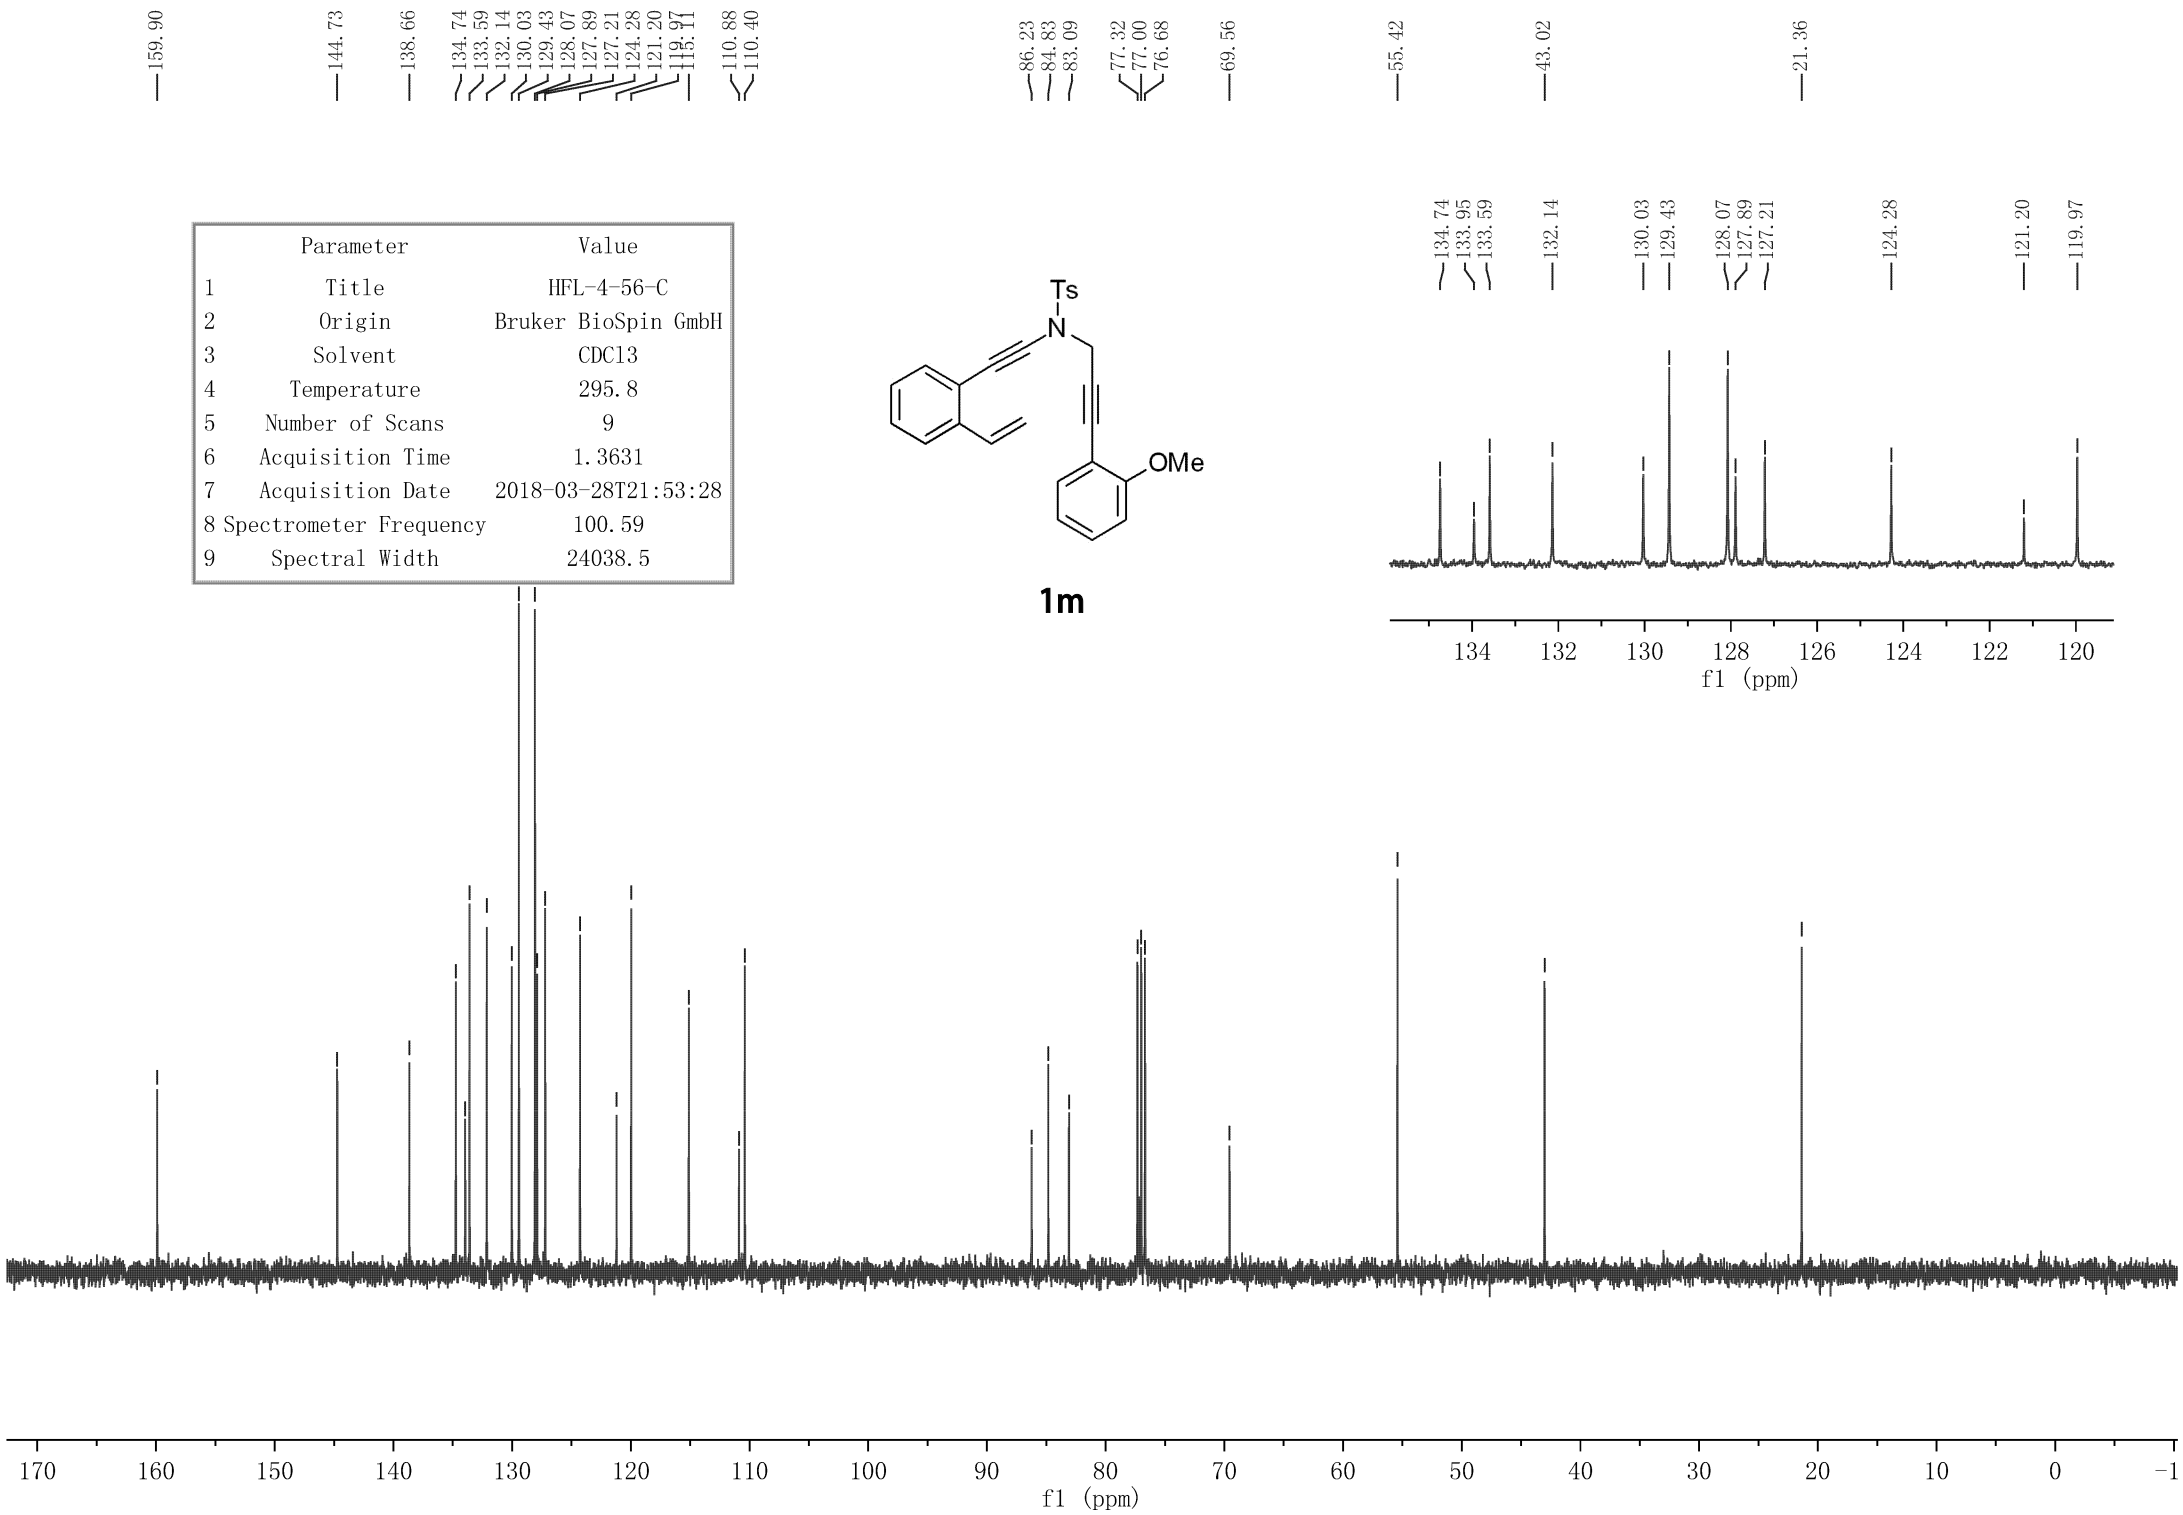



144.76  
138.92  
137.53  
136.36  
134.94  
132.69  
132.36  
129.59  
129.38  
129.11  
128.27  
128.03  
127.34  
124.45  
121.37  
119.17

86.91  
86.36  
80.14  
77.32  
77.00  
76.68  
69.62

42.97

21.54  
19.67  
19.45

| Parameter                | Value               |
|--------------------------|---------------------|
| 1 Title                  | HFL-4-61-C          |
| 2 Origin                 | Bruker BioSpin GmbH |
| 3 Solvent                | CDC13               |
| 4 Temperature            | 296.7               |
| 5 Number of Scans        | 59                  |
| 6 Acquisition Time       | 1.3631              |
| 7 Acquisition Date       | 2018-04-02T10:08:49 |
| 8 Spectrometer Frequency | 100.61              |
| 9 Spectral Width         | 24038.5             |

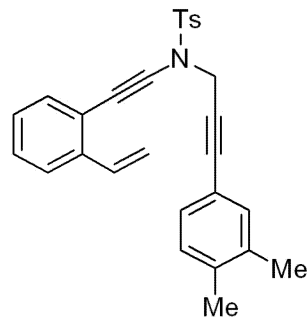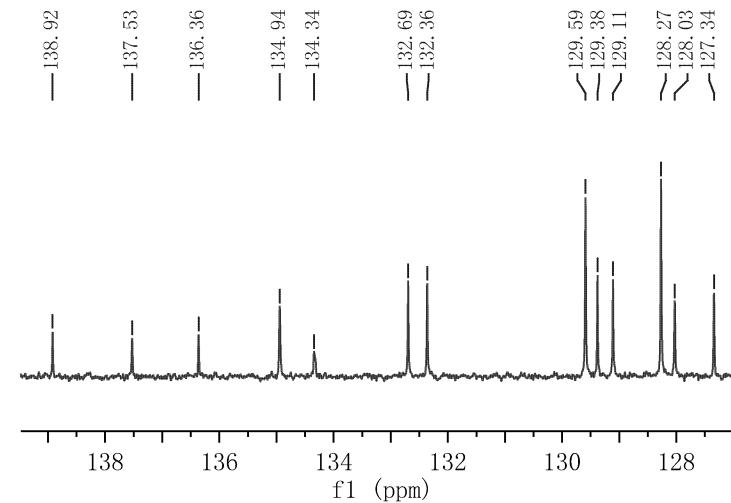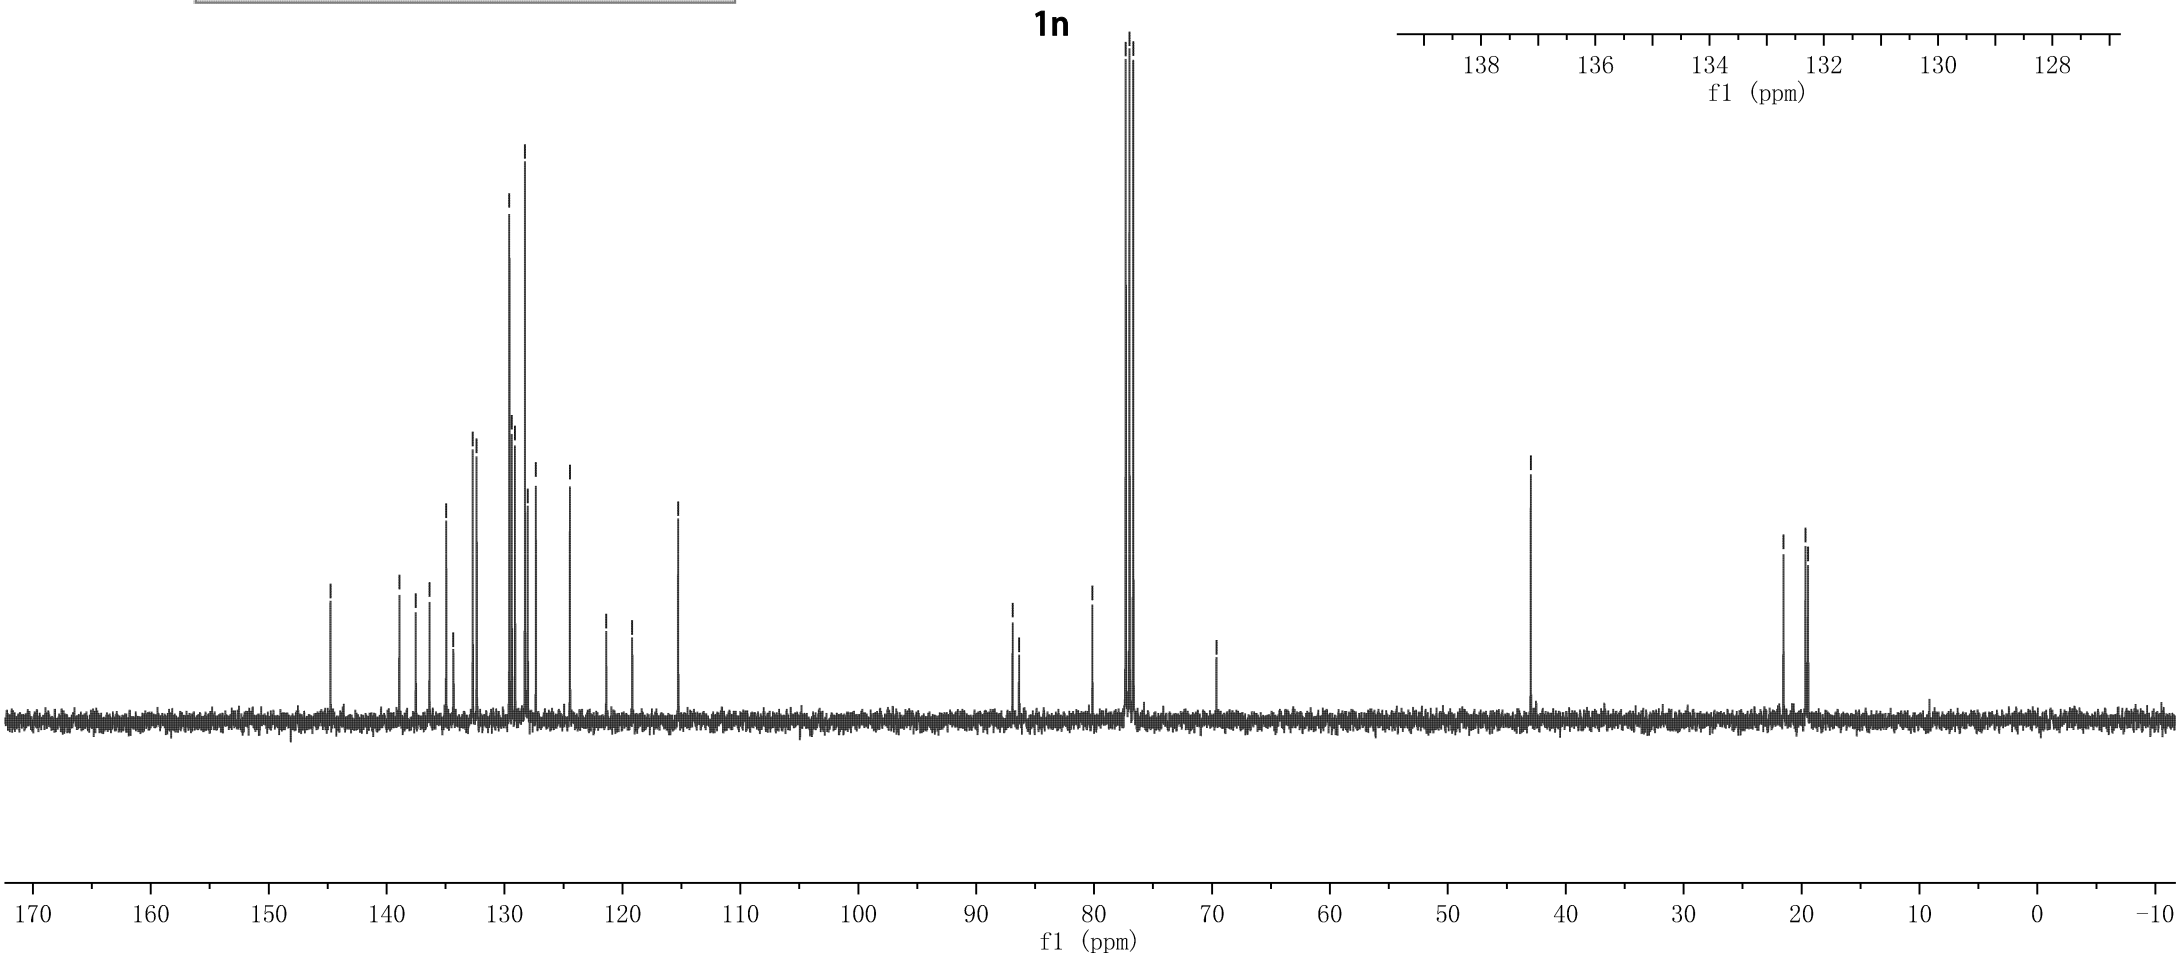

7.947  
7.926  
7.912  
7.891  
7.756  
7.735  
7.517  
7.497  
7.431  
7.411  
7.391  
7.329  
7.309  
7.291  
7.260  
7.217  
7.188  
7.134  
7.131  
7.112  
7.066  
7.045

5.725  
5.723  
5.682  
5.680

5.106  
5.104  
5.079  
5.077  
4.721

2.024

| Parameter                | Value               |
|--------------------------|---------------------|
| 1 Title                  | HFL-4-43-H          |
| 2 Origin                 | Bruker BioSpin GmbH |
| 3 Solvent                | CDC13               |
| 4 Temperature            | 297.0               |
| 5 Number of Scans        | 6                   |
| 6 Acquisition Time       | 3.9846              |
| 7 Acquisition Date       | 2018-03-26T16:04:53 |
| 8 Spectrometer Frequency | 400.13              |
| 9 Spectral Width         | 8223.7              |

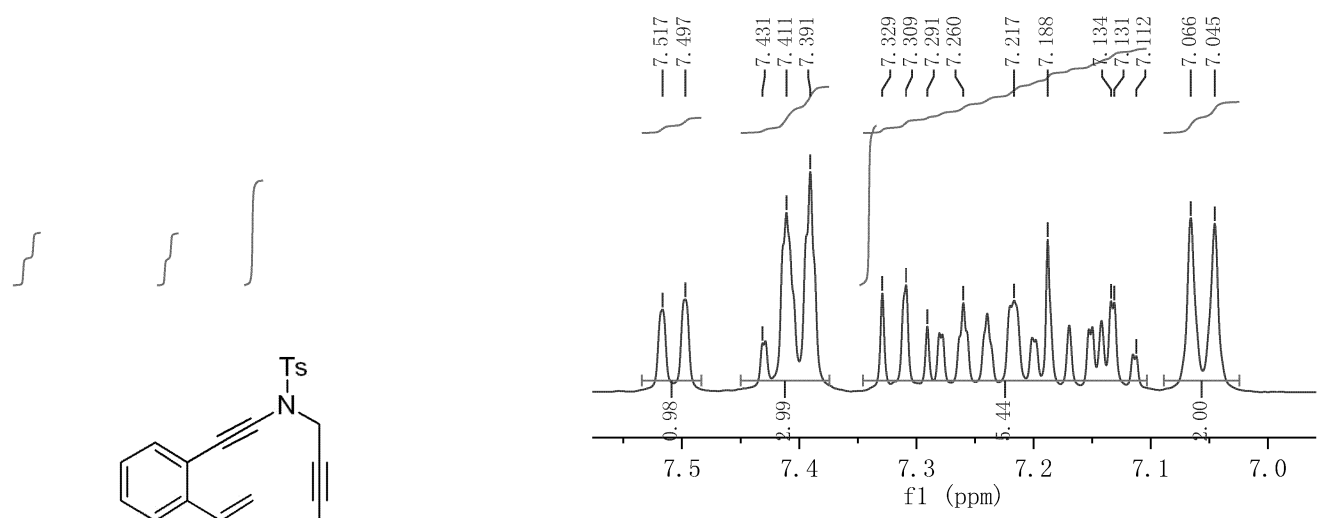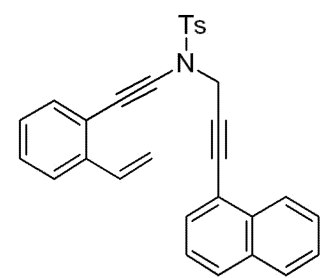

**10**

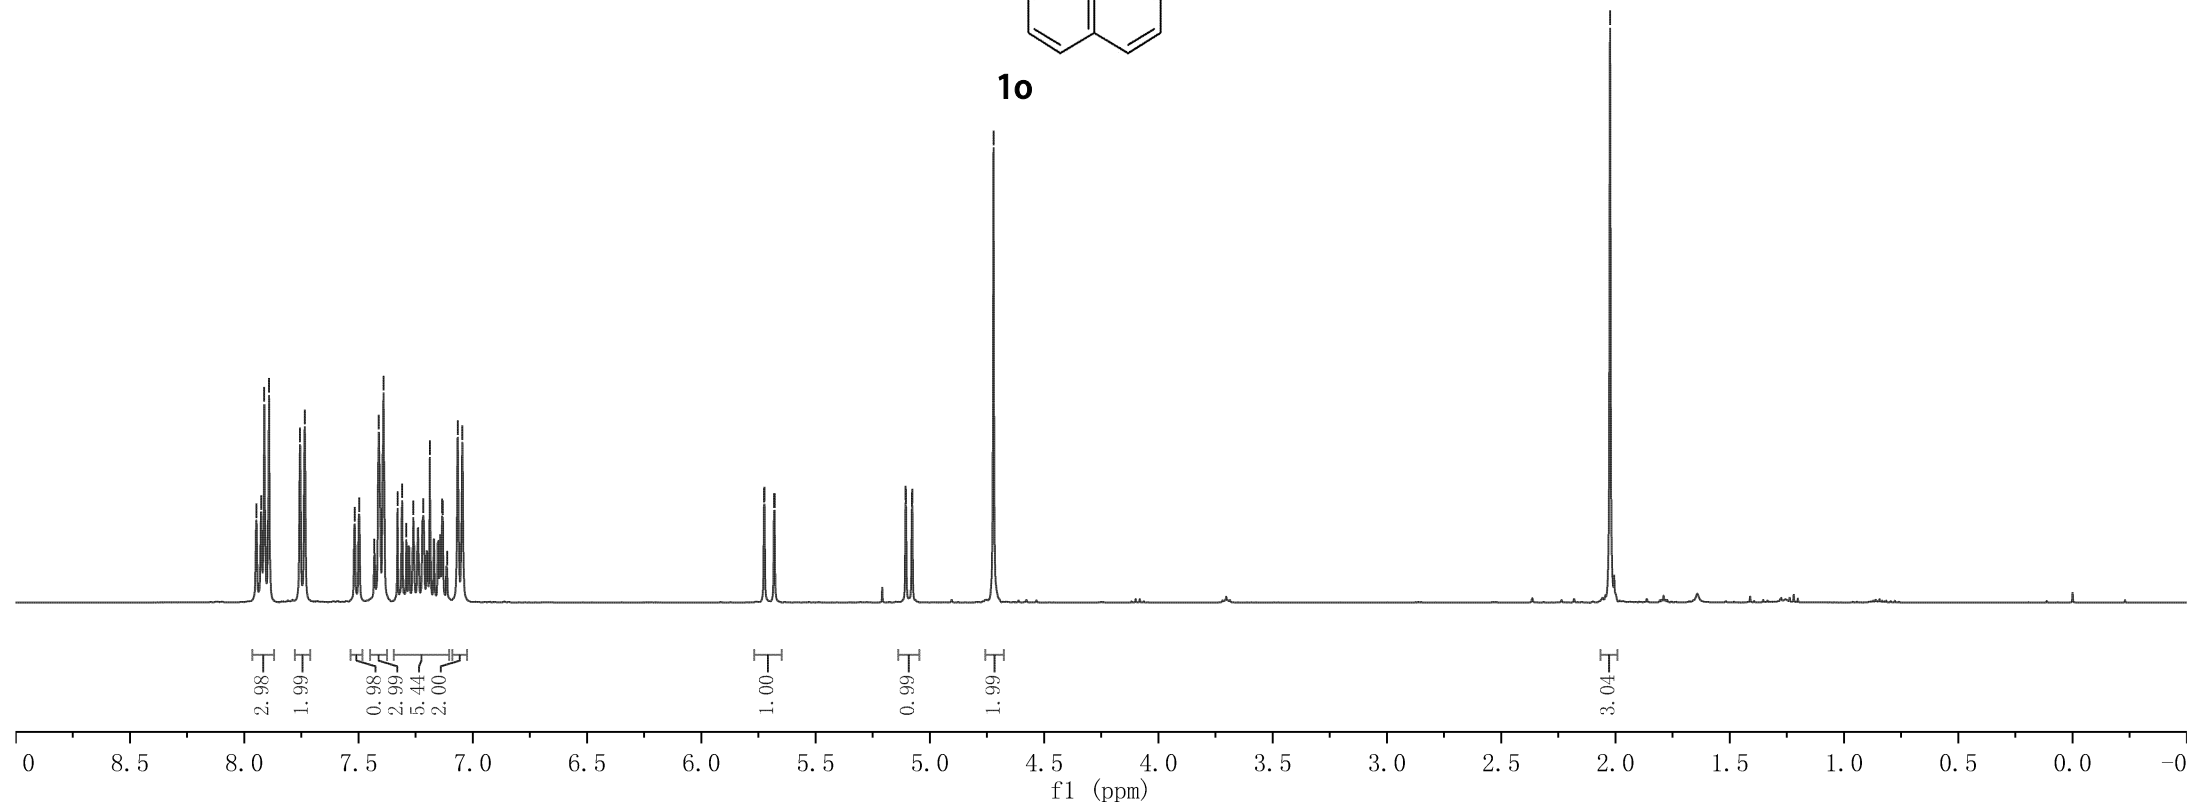

144.94  
138.80  
132.27  
130.46  
129.46  
129.00  
128.05  
127.97  
127.31  
126.63  
126.28  
125.89  
124.80  
124.44  
119.48

86.43  
85.87  
84.81  
77.32  
77.00  
76.68  
69.86

43.05

21.17

| Parameter                | Value               |
|--------------------------|---------------------|
| 1 Title                  | HFL-4-43-C          |
| 2 Origin                 | Bruker BioSpin GmbH |
| 3 Solvent                | CDC13               |
| 4 Temperature            | 297.0               |
| 5 Number of Scans        | 12                  |
| 6 Acquisition Time       | 1.3631              |
| 7 Acquisition Date       | 2018-03-26T16:07:24 |
| 8 Spectrometer Frequency | 100.61              |
| 9 Spectral Width         | 24038.5             |

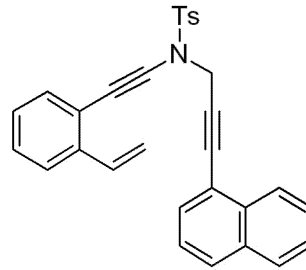

**10**

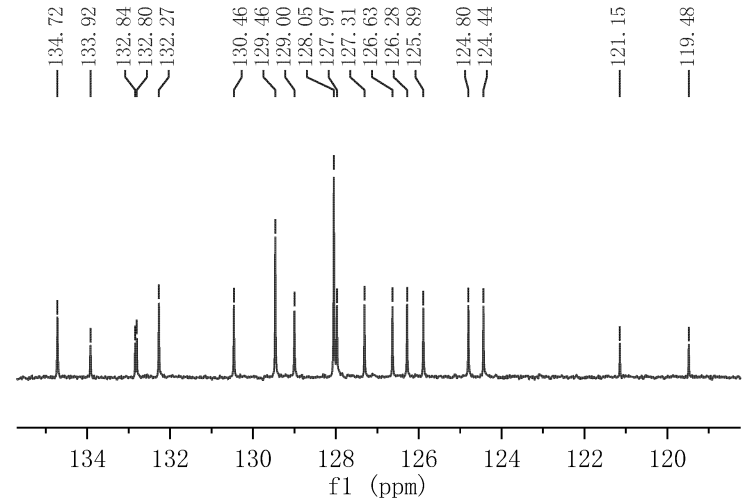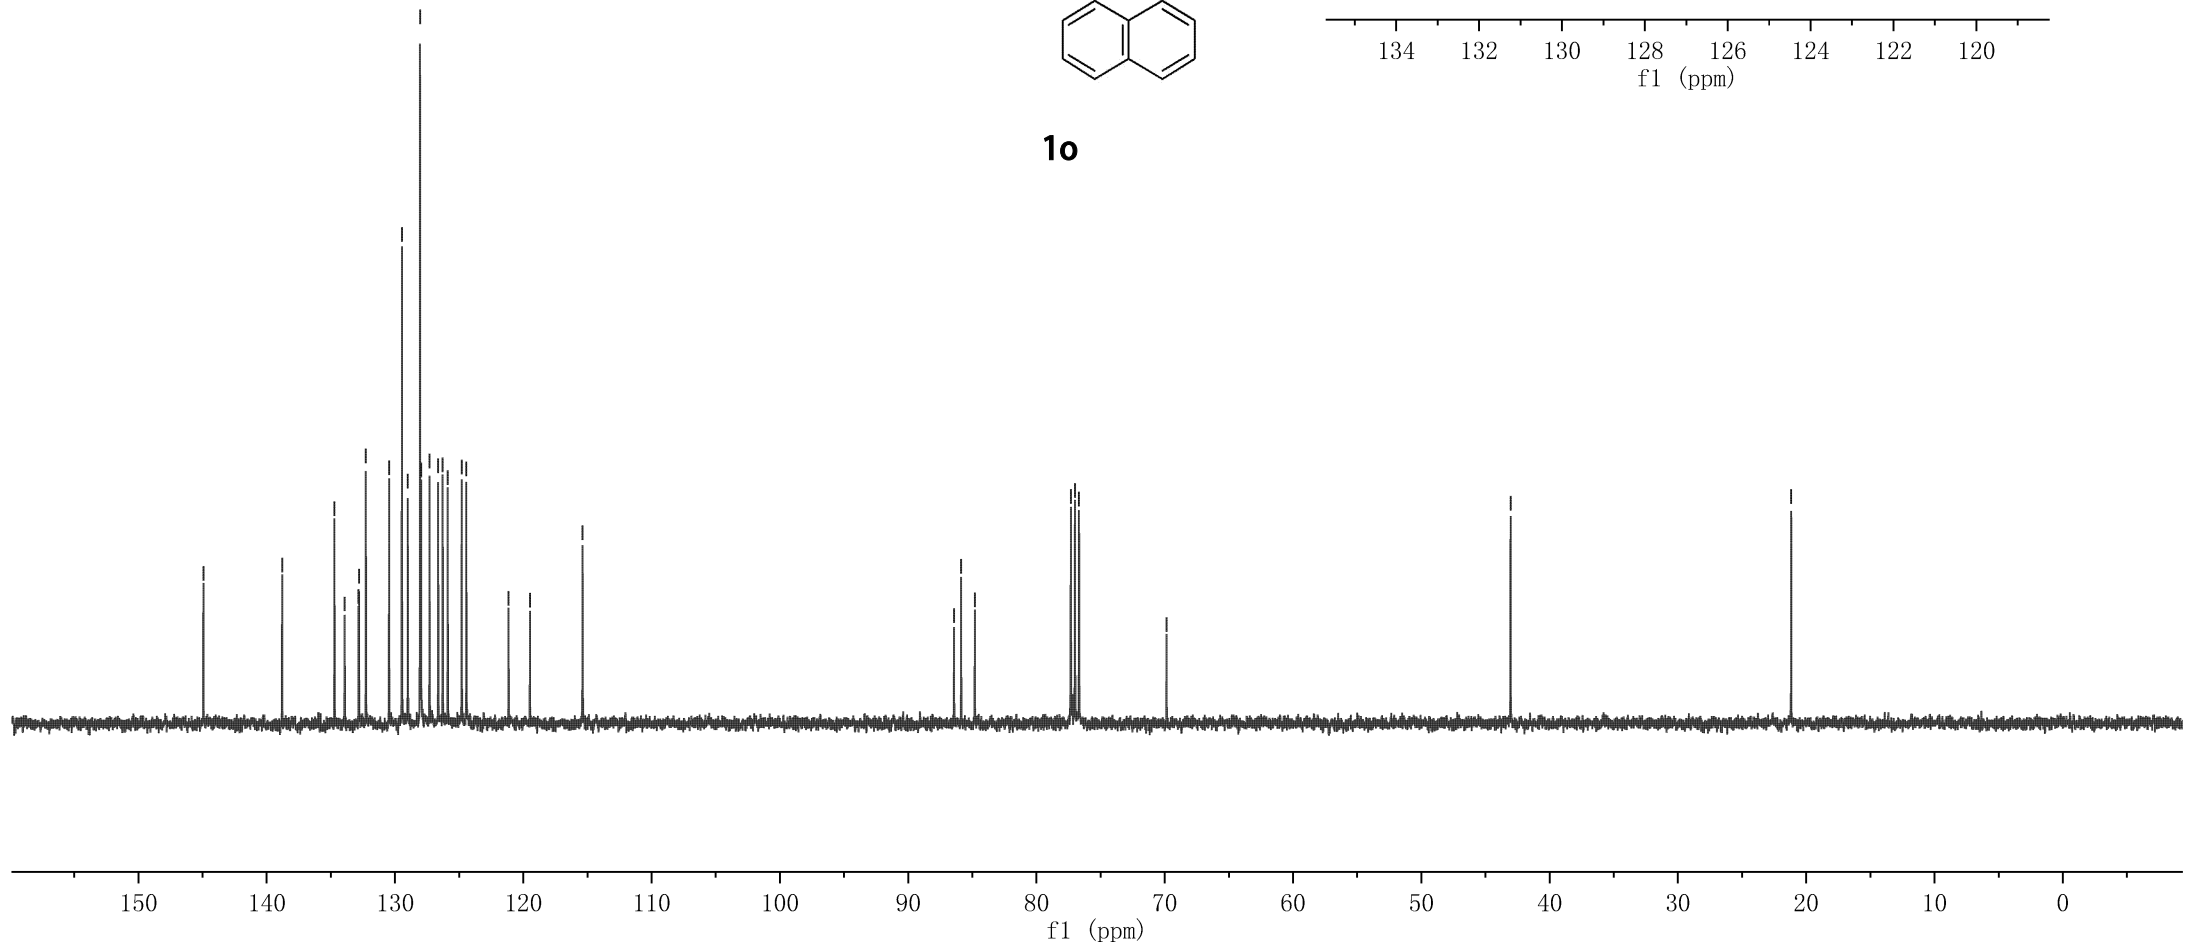

7.908  
7.887  
7.533  
7.513  
7.394  
7.392  
7.375  
7.373  
7.290  
7.270  
7.242  
7.203  
7.164  
7.146  
7.119  
7.103  
7.005  
6.911  
6.902  
6.899  
6.889  
5.708

5.169  
5.141  
4.582

2.358

| Parameter                | Value               |
|--------------------------|---------------------|
| 1 Title                  | HFL-4-53-H          |
| 2 Origin                 | Bruker BioSpin GmbH |
| 3 Solvent                | CDC13               |
| 4 Temperature            | 296.7               |
| 5 Number of Scans        | 4                   |
| 6 Acquisition Time       | 3.9846              |
| 7 Acquisition Date       | 2018-03-28T10:22:14 |
| 8 Spectrometer Frequency | 400.13              |
| 9 Spectral Width         | 8223.7              |

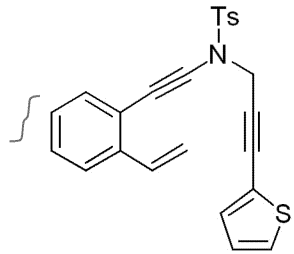

1p

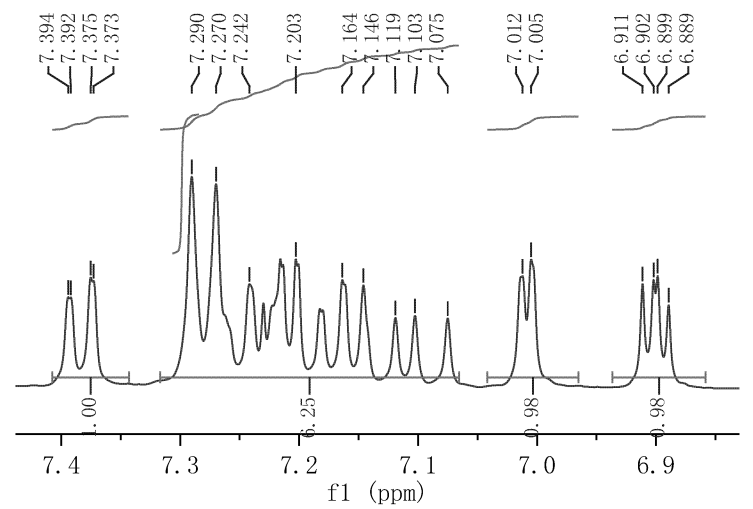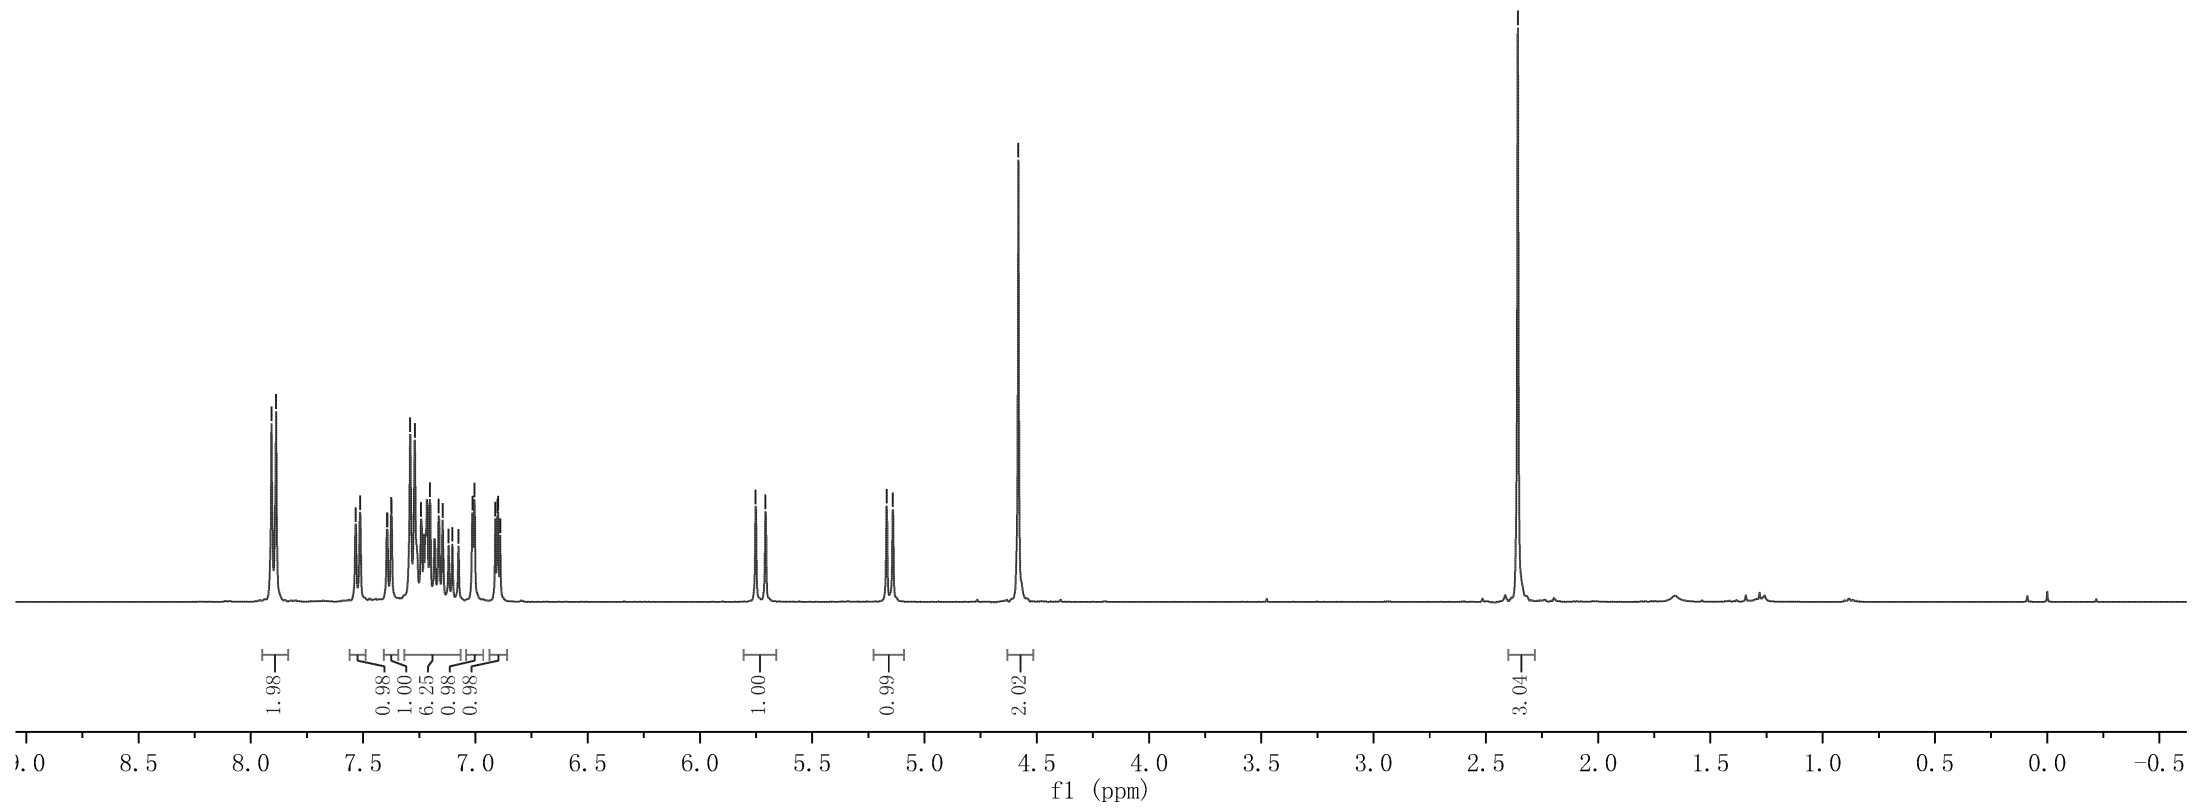

| Parameter                | Value               |
|--------------------------|---------------------|
| 1 Title                  | hf1-4-53-C          |
| 2 Origin                 | Bruker BioSpin GmbH |
| 3 Solvent                | CDC13               |
| 4 Temperature            | 296.7               |
| 5 Number of Scans        | 17                  |
| 6 Acquisition Time       | 1.3631              |
| 7 Acquisition Date       | 2018-03-28T10:26:24 |
| 8 Spectrometer Frequency | 100.61              |
| 9 Spectral Width         | 24038.5             |

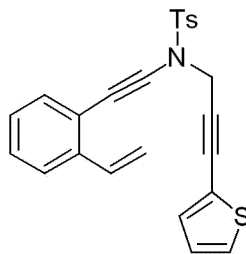

**1p**

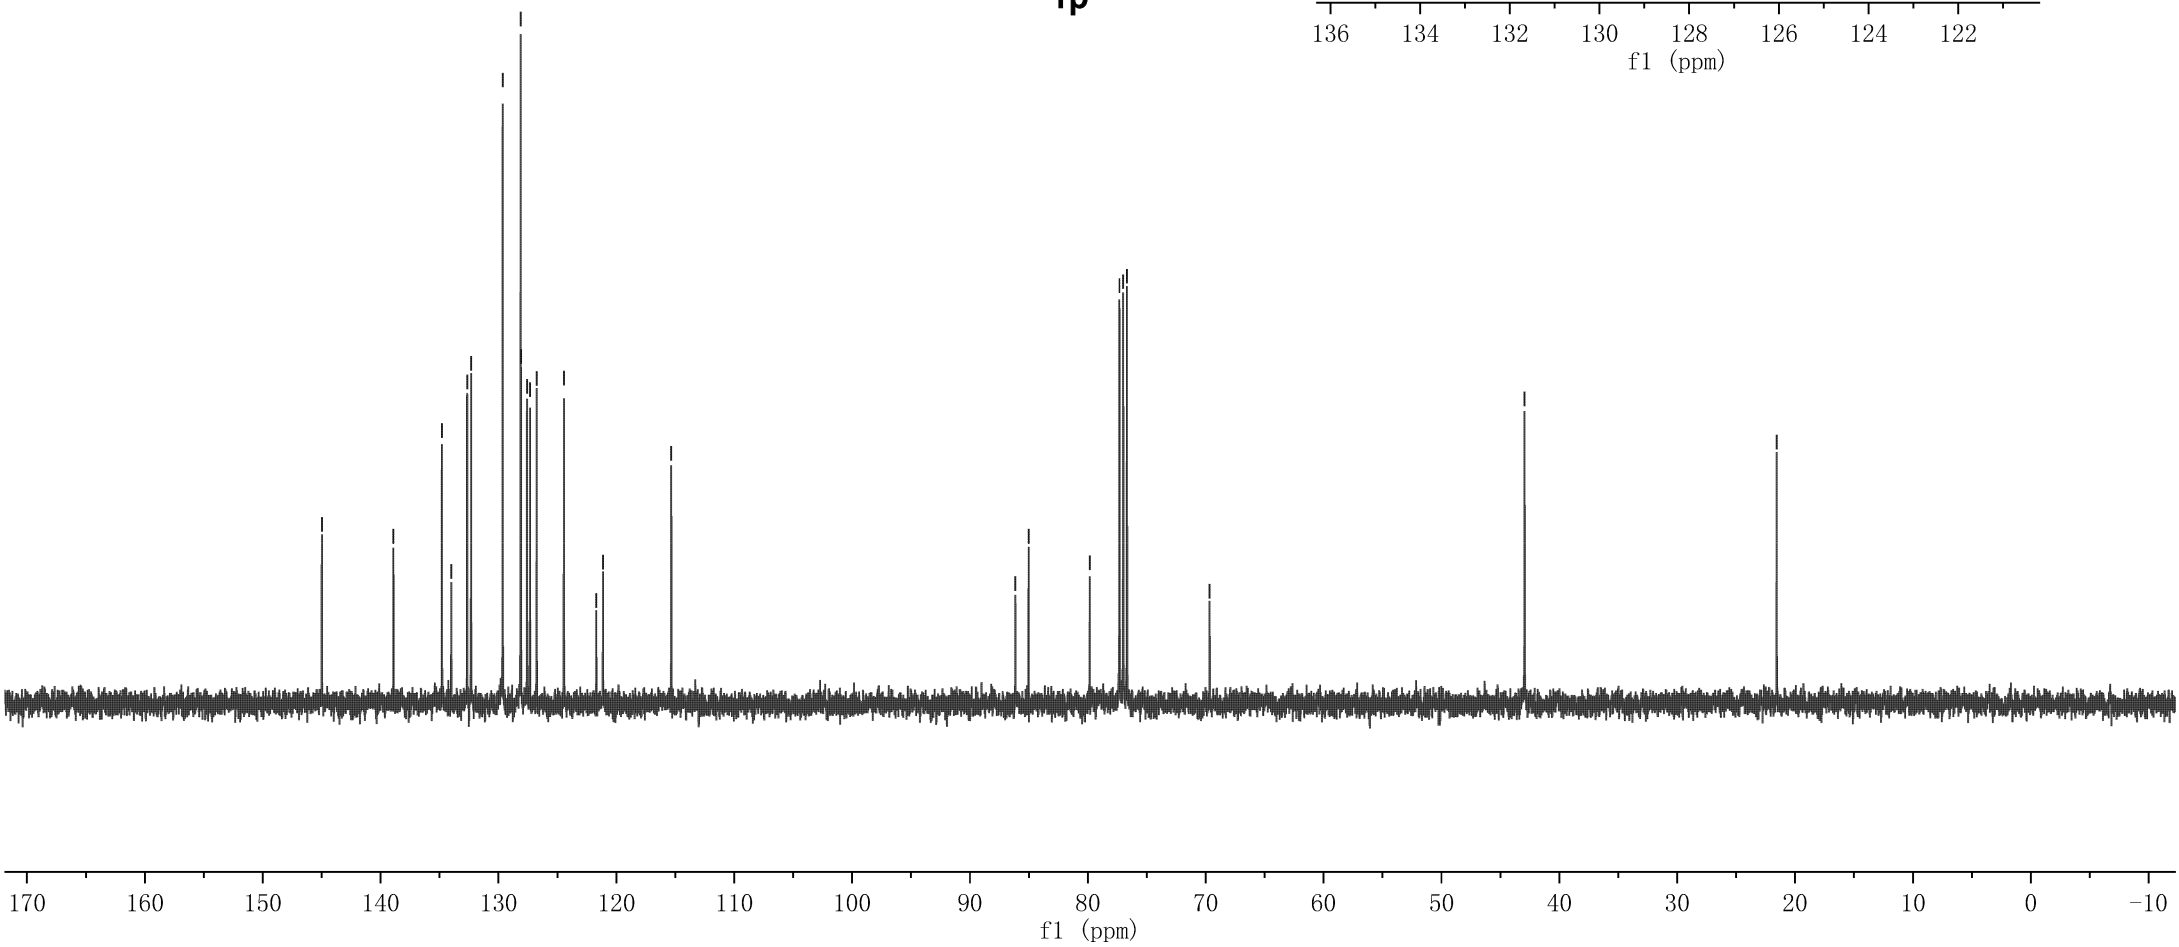

144.99  
138.91  
134.80  
132.66  
132.32  
129.64  
128.12  
128.09  
127.58  
127.32  
126.76  
124.45  
121.56  
116.34

86.14  
85.03  
79.84  
77.32  
77.00  
76.68  
69.67

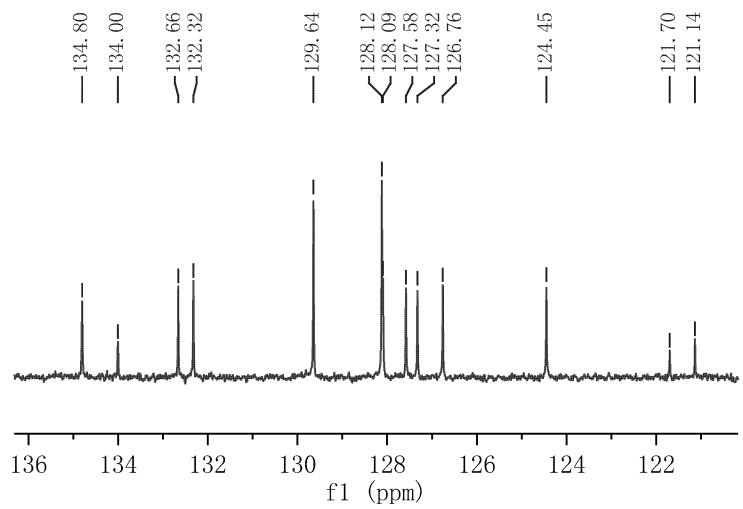

134.80  
134.00  
132.66  
132.32  
129.64  
128.12  
128.09  
127.58  
127.32  
126.76  
124.45  
121.70  
121.14



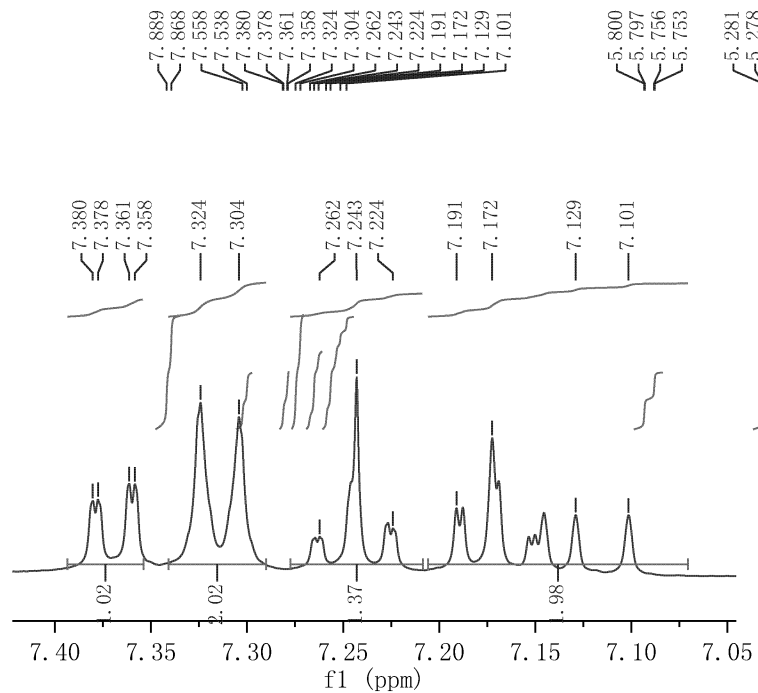

5.800, 5.797, 5.756, 5.753, 5.281, 5.278, 5.253, 5.251

4.351, 4.346

2.420, 2.200, 2.172

1.567, 1.551, 1.540, 1.453, 1.416, 1.378, 1.244, 1.207, 1.191, 1.173

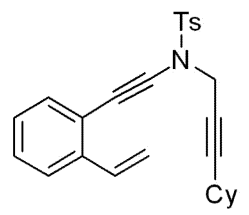

| Parameter                | Value               |
|--------------------------|---------------------|
| 1 Title                  | hf1-4-221-h         |
| 2 Origin                 | Bruker BioSpin GmbH |
| 3 Solvent                | CDC13               |
| 4 Temperature            | 298.1               |
| 5 Number of Scans        | 10                  |
| 6 Acquisition Time       | 3.9846              |
| 7 Acquisition Date       | 2018-05-17T15:04:32 |
| 8 Spectrometer Frequency | 400.13              |
| 9 Spectral Width         | 8223.7              |

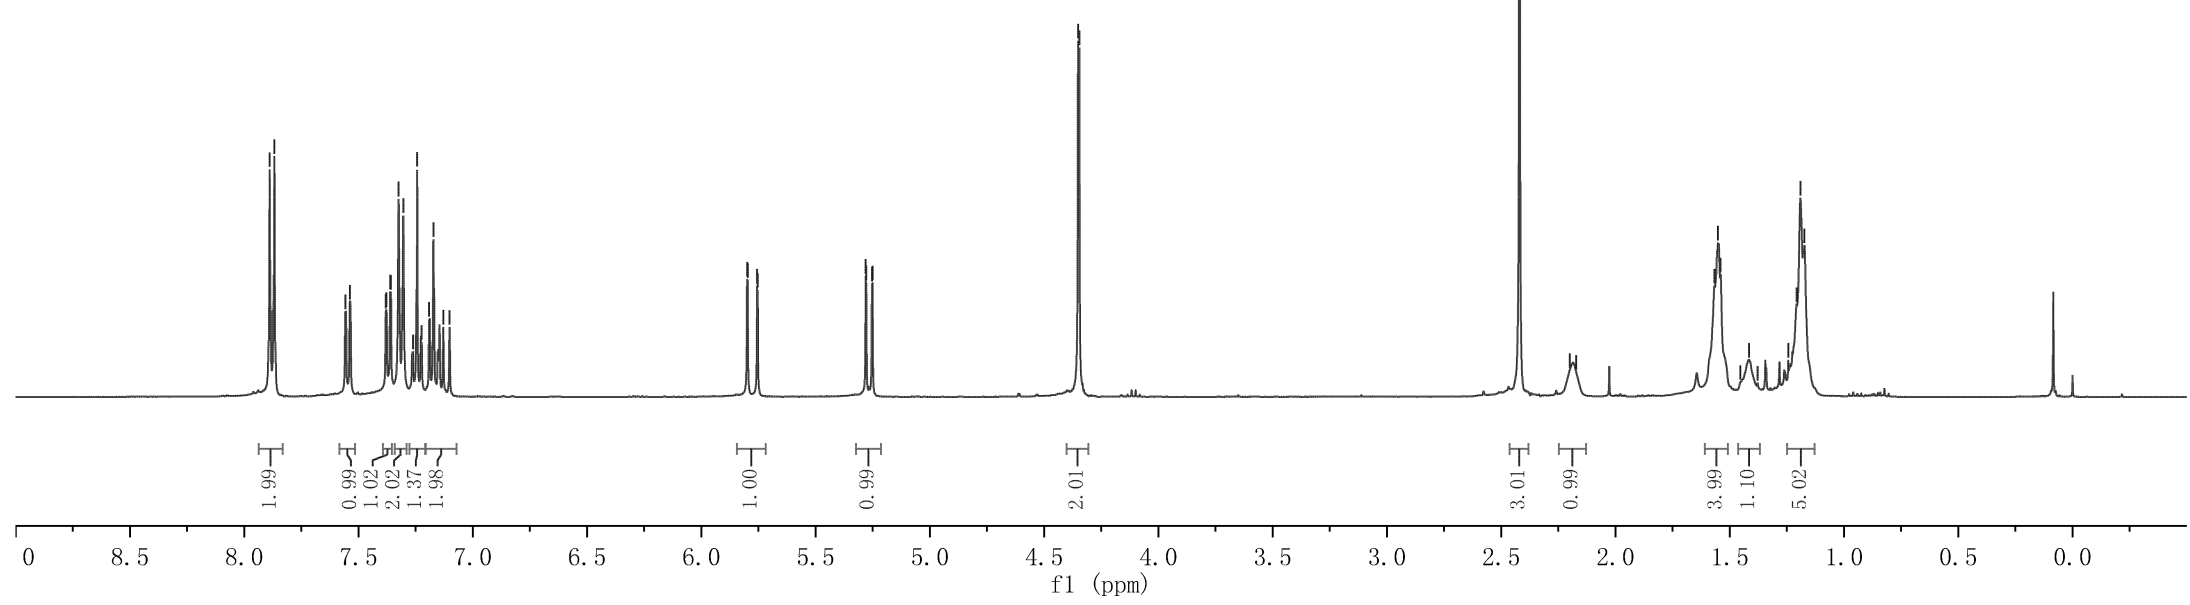

144.62  
138.71  
134.96  
134.47  
132.21  
129.49  
128.14  
127.90  
127.30  
124.39  
121.47  
115.08

91.36  
86.33  
77.32  
77.00  
76.68  
71.89  
69.49

42.43  
32.05  
28.70  
25.68  
24.47  
21.51

| Parameter                | Value               |
|--------------------------|---------------------|
| 1 Title                  | hf1-4-221-c         |
| 2 Origin                 | Bruker BioSpin GmbH |
| 3 Solvent                | CDC13               |
| 4 Temperature            | 298.1               |
| 5 Number of Scans        | 12                  |
| 6 Acquisition Time       | 1.3631              |
| 7 Acquisition Date       | 2018-05-17T15:07:09 |
| 8 Spectrometer Frequency | 100.61              |
| 9 Spectral Width         | 24038.5             |

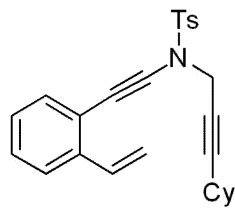

**1q**

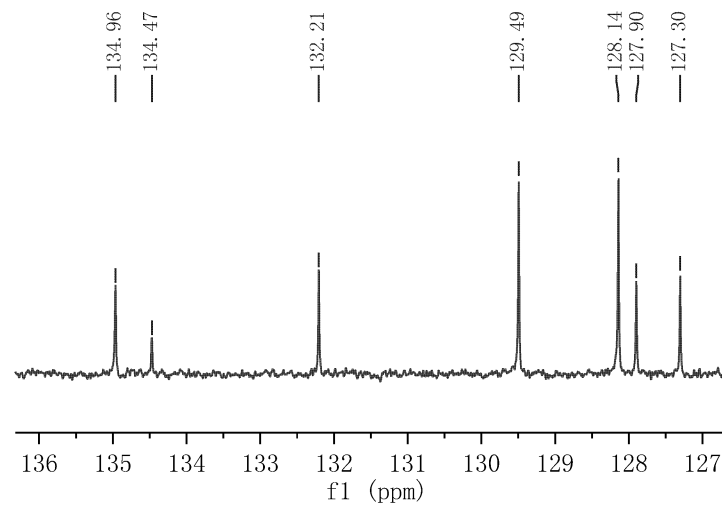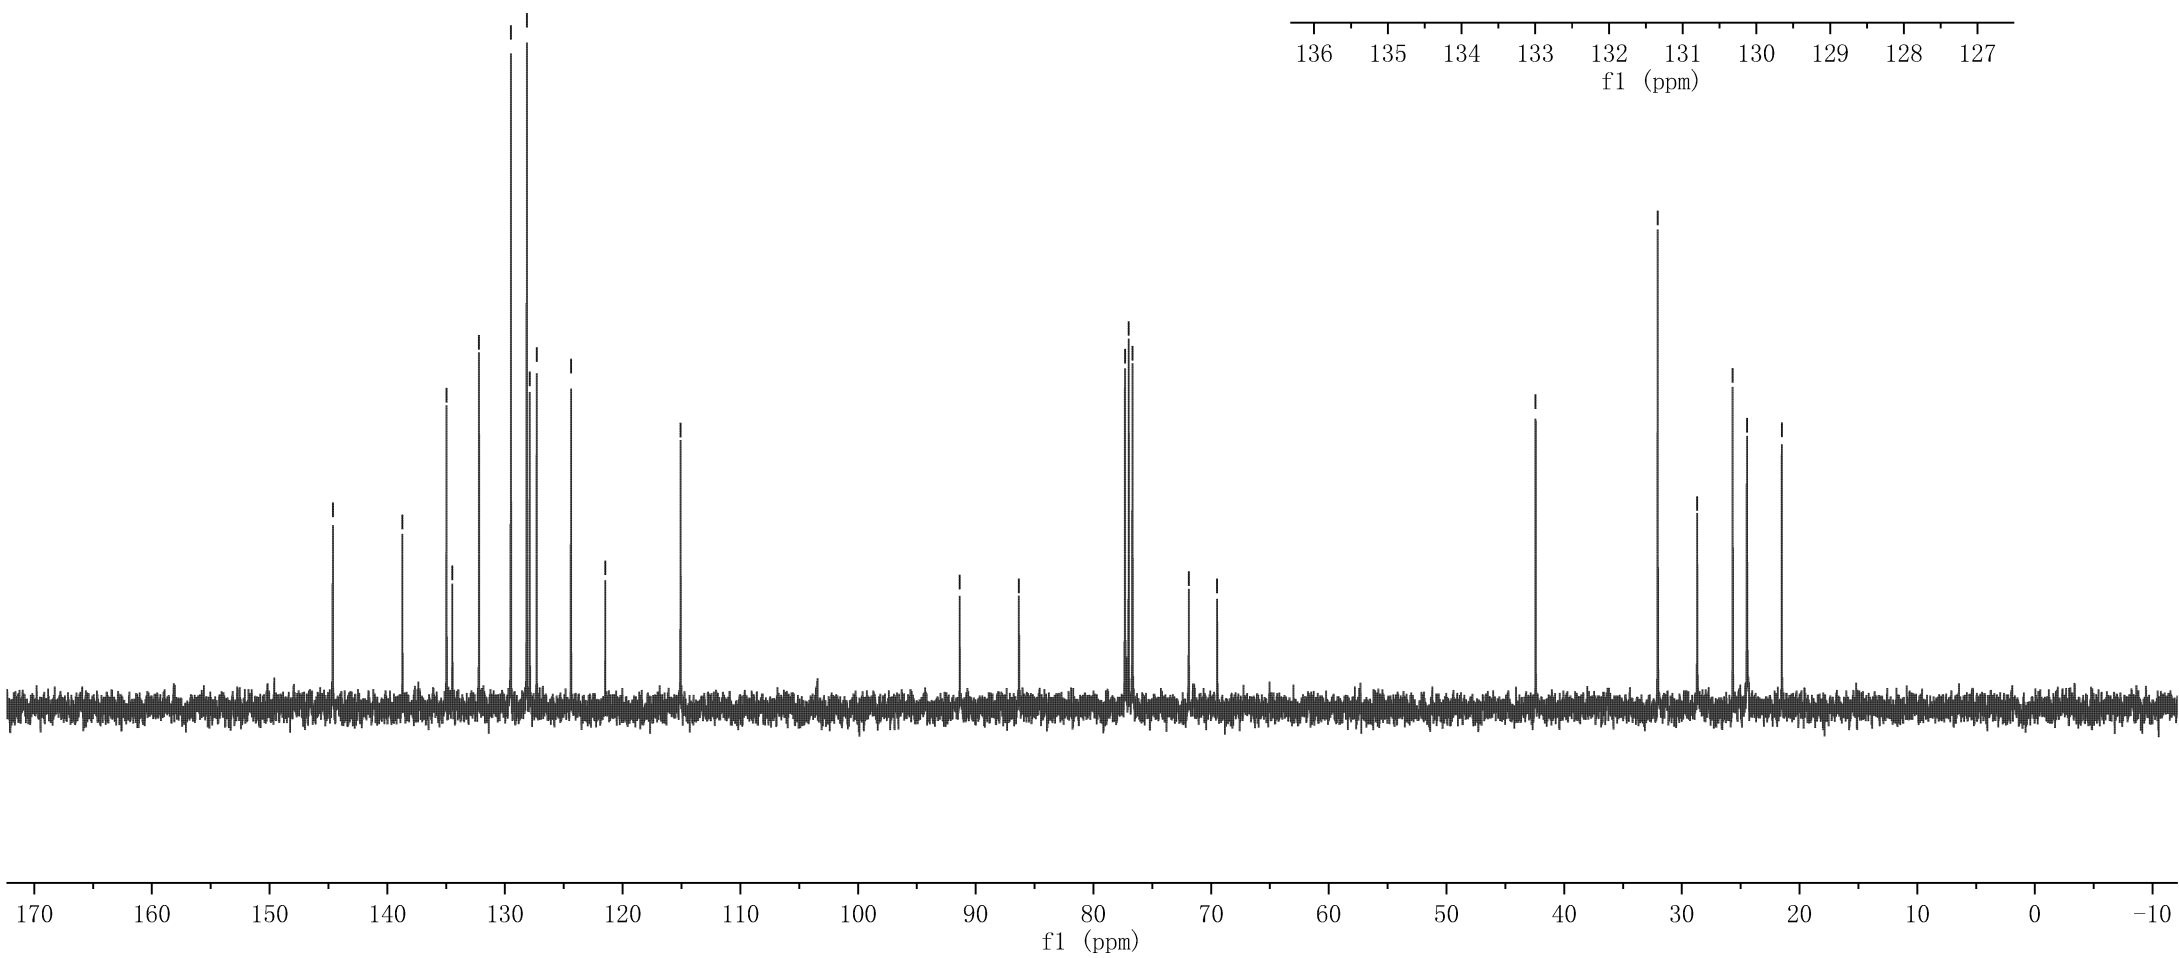

7.910  
7.889  
7.417  
7.397  
7.280  
7.262  
7.234  
7.212  
7.196  
7.160  
7.157  
7.088  
7.061  
7.039  
7.015

5.695  
5.692  
5.651  
5.649  
5.066  
5.063  
5.038  
5.036  
4.551

2.293  
2.238

| Parameter                | Value               |
|--------------------------|---------------------|
| 1 Title                  | hfl-4-82-H          |
| 2 Origin                 | Bruker BioSpin GmbH |
| 3 Solvent                | CDCl3               |
| 4 Temperature            | 297.1               |
| 5 Number of Scans        | 9                   |
| 6 Acquisition Time       | 3.9846              |
| 7 Acquisition Date       | 2018-04-06T10:06:14 |
| 8 Spectrometer Frequency | 400.13              |
| 9 Spectral Width         | 8223.7              |

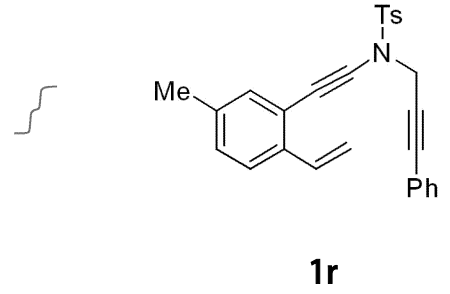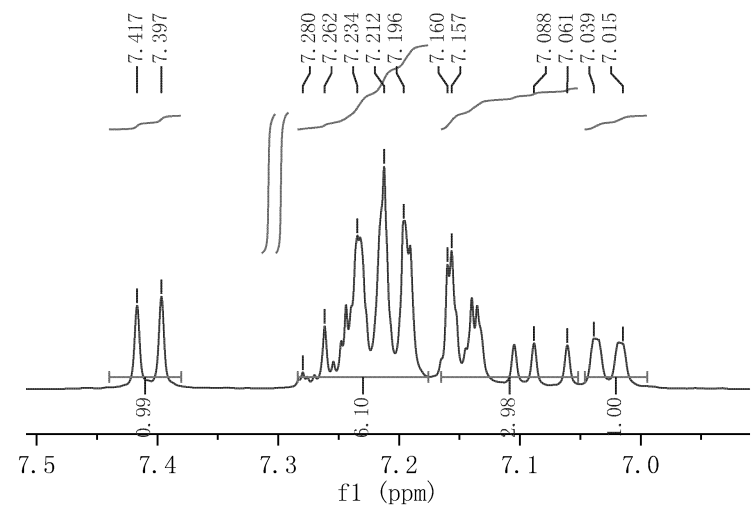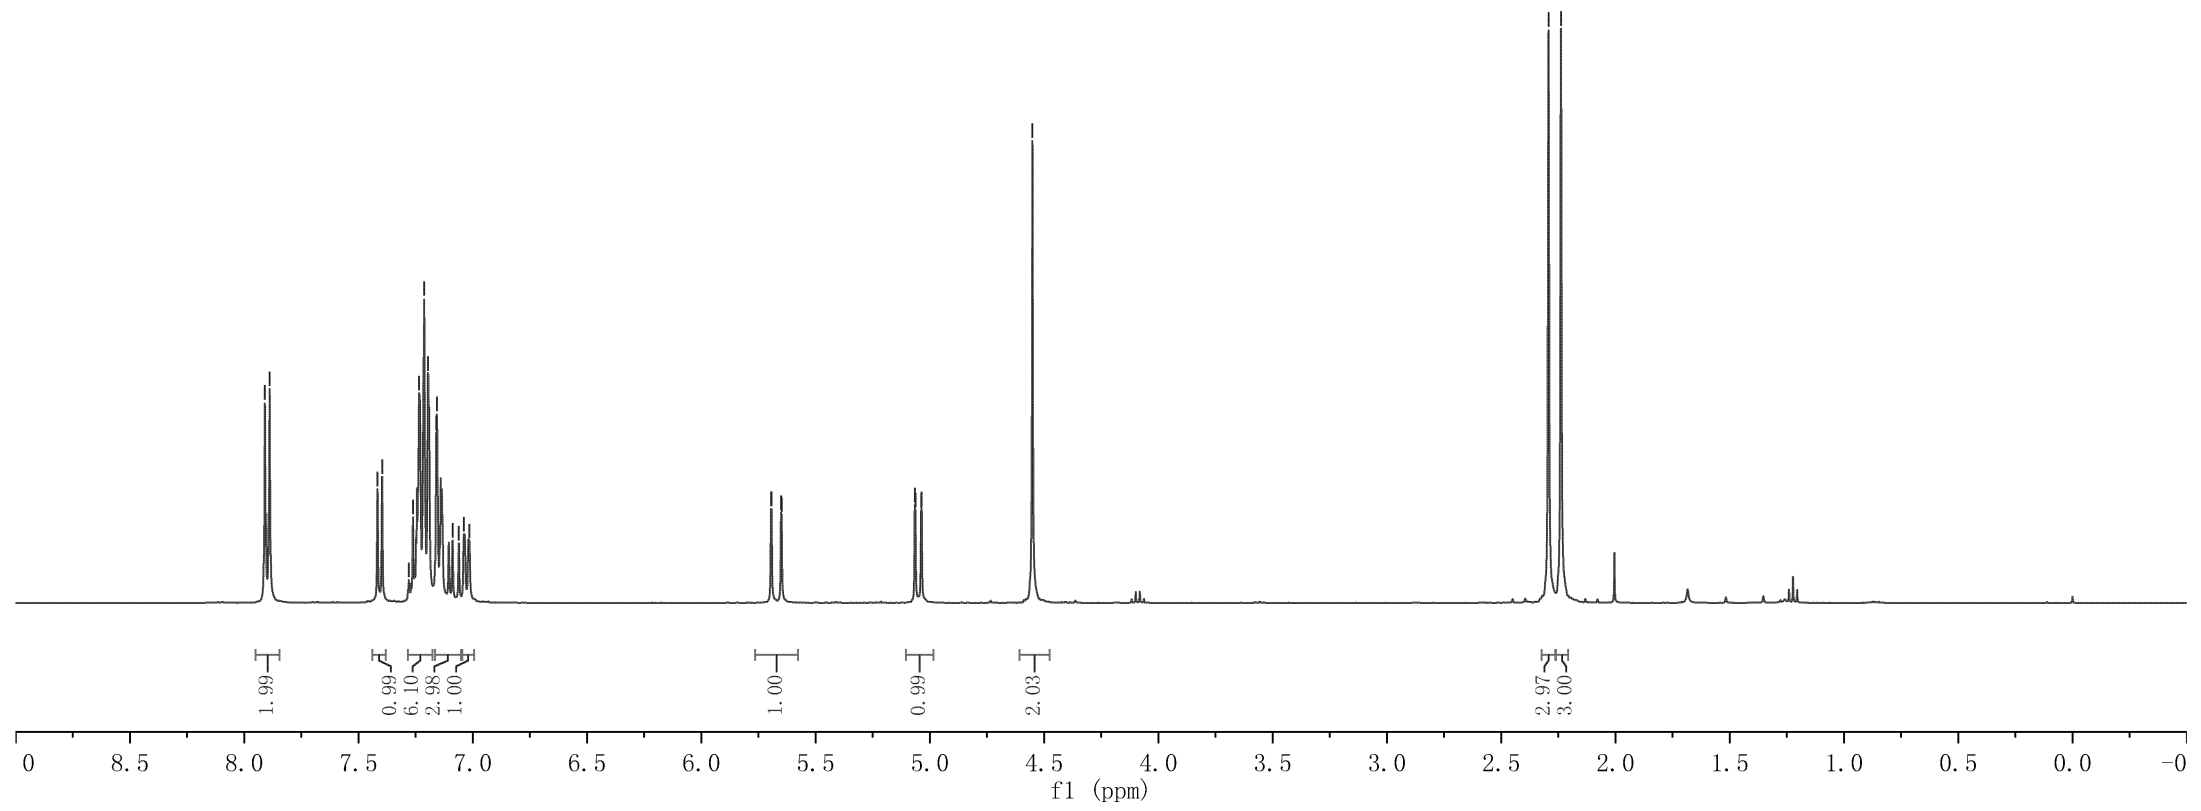

144.81  
137.11  
136.03  
134.54  
132.57  
131.52  
129.50  
129.04  
128.49  
128.08  
124.97  
124.26  
121.78  
120.93  
114.21

86.48  
85.85  
81.08  
77.32  
77.00  
76.68  
69.69

42.74

21.35  
20.70

| Parameter                | Value               |
|--------------------------|---------------------|
| 1 Title                  | hf1-4-82-C          |
| 2 Origin                 | Bruker BioSpin GmbH |
| 3 Solvent                | CDC13               |
| 4 Temperature            | 297.1               |
| 5 Number of Scans        | 10                  |
| 6 Acquisition Time       | 1.3631              |
| 7 Acquisition Date       | 2018-04-06T10:08:44 |
| 8 Spectrometer Frequency | 100.61              |
| 9 Spectral Width         | 24038.5             |

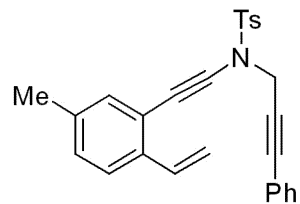

**1r**

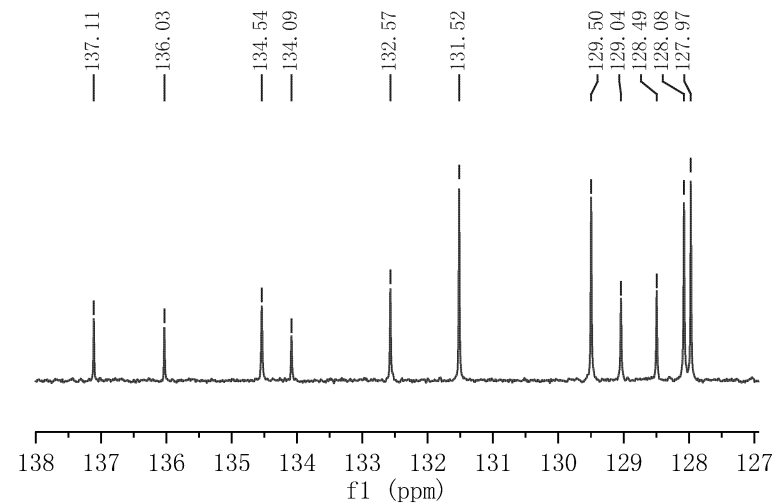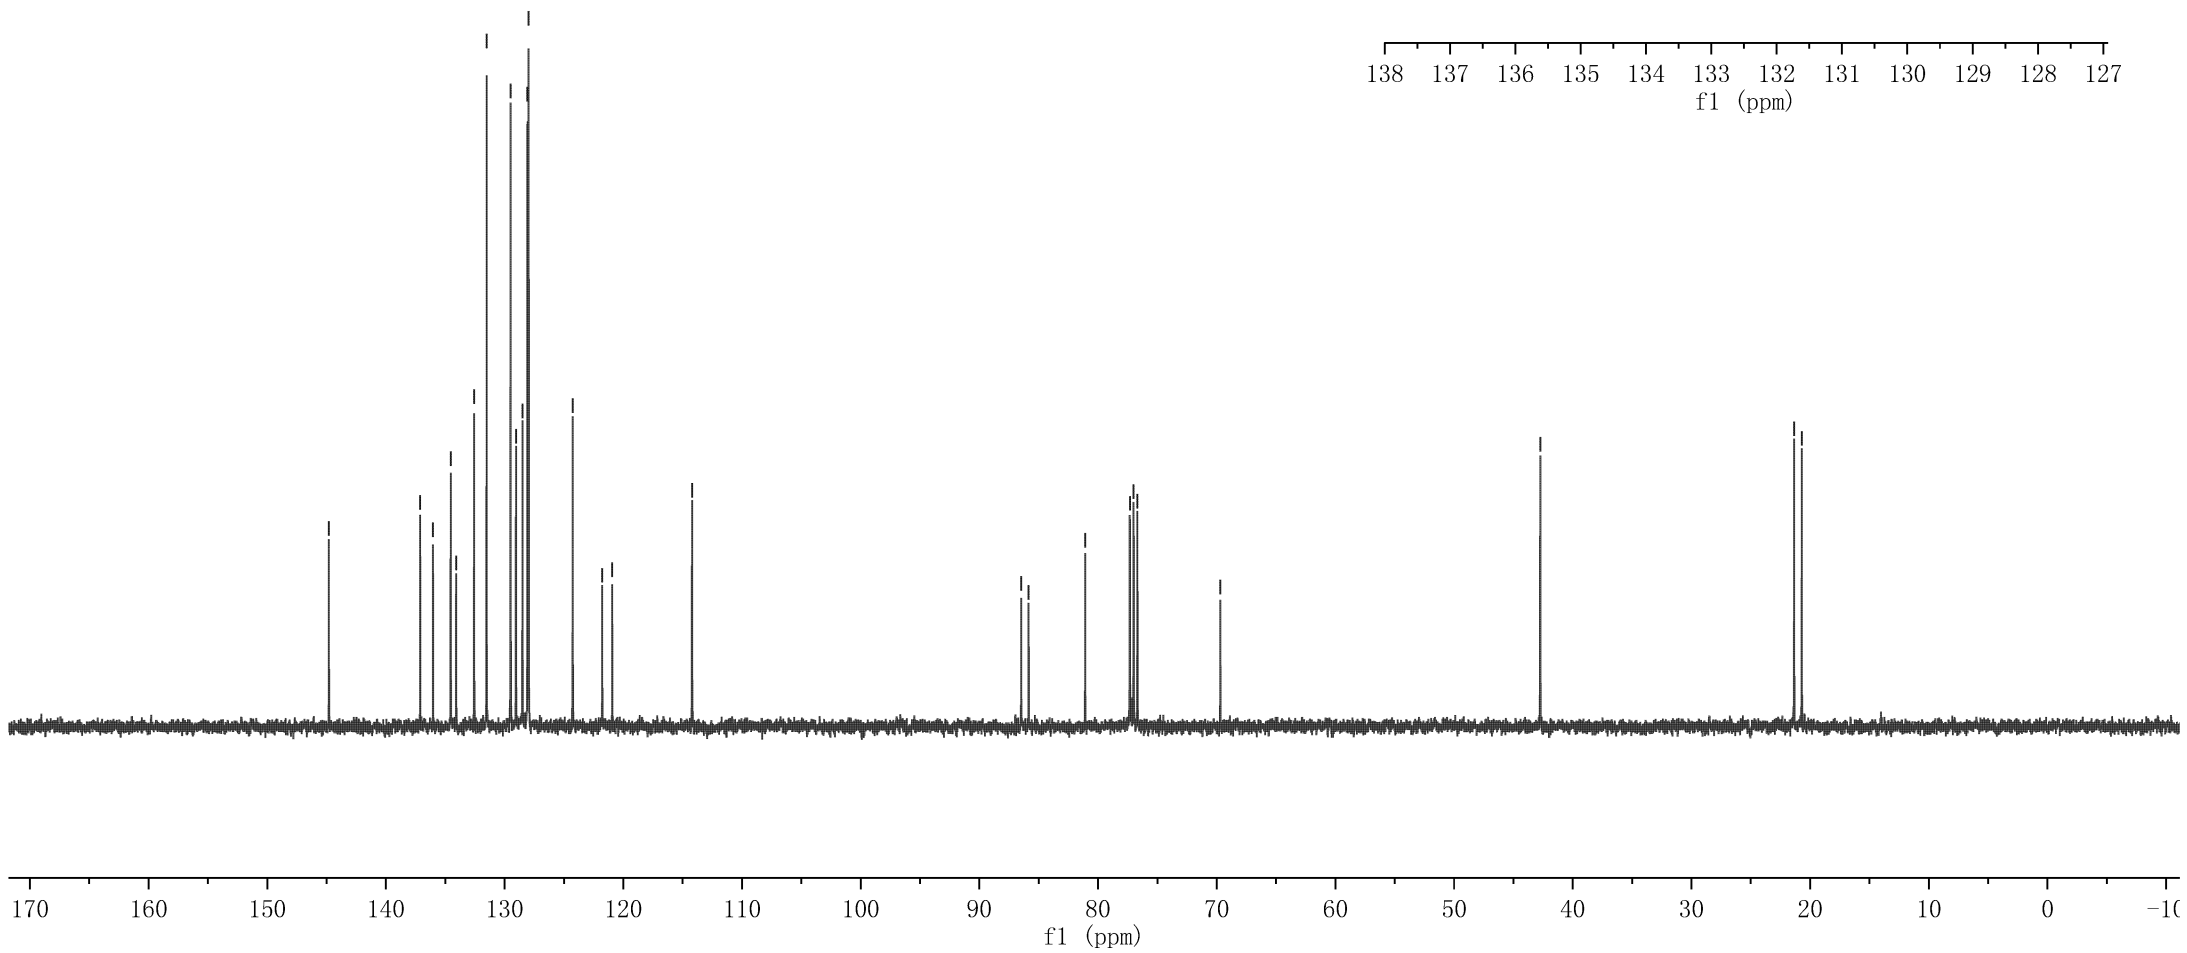

| Parameter                | Value               |
|--------------------------|---------------------|
| 1 Title                  | HFL-4-74-H          |
| 2 Origin                 | Bruker BioSpin GmbH |
| 3 Solvent                | CDC13               |
| 4 Temperature            | 295.7               |
| 5 Number of Scans        | 8                   |
| 6 Acquisition Time       | 3.9846              |
| 7 Acquisition Date       | 2018-04-05T21:40:05 |
| 8 Spectrometer Frequency | 400.03              |
| 9 Spectral Width         | 8223.7              |

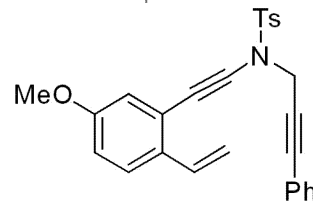

**1s**

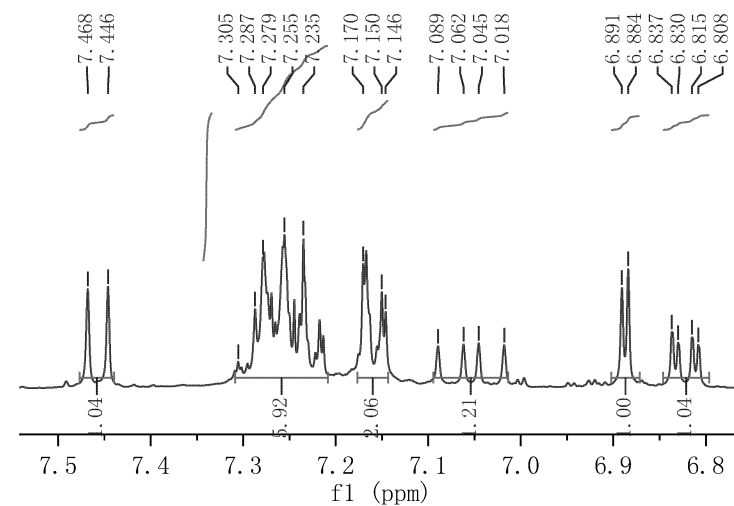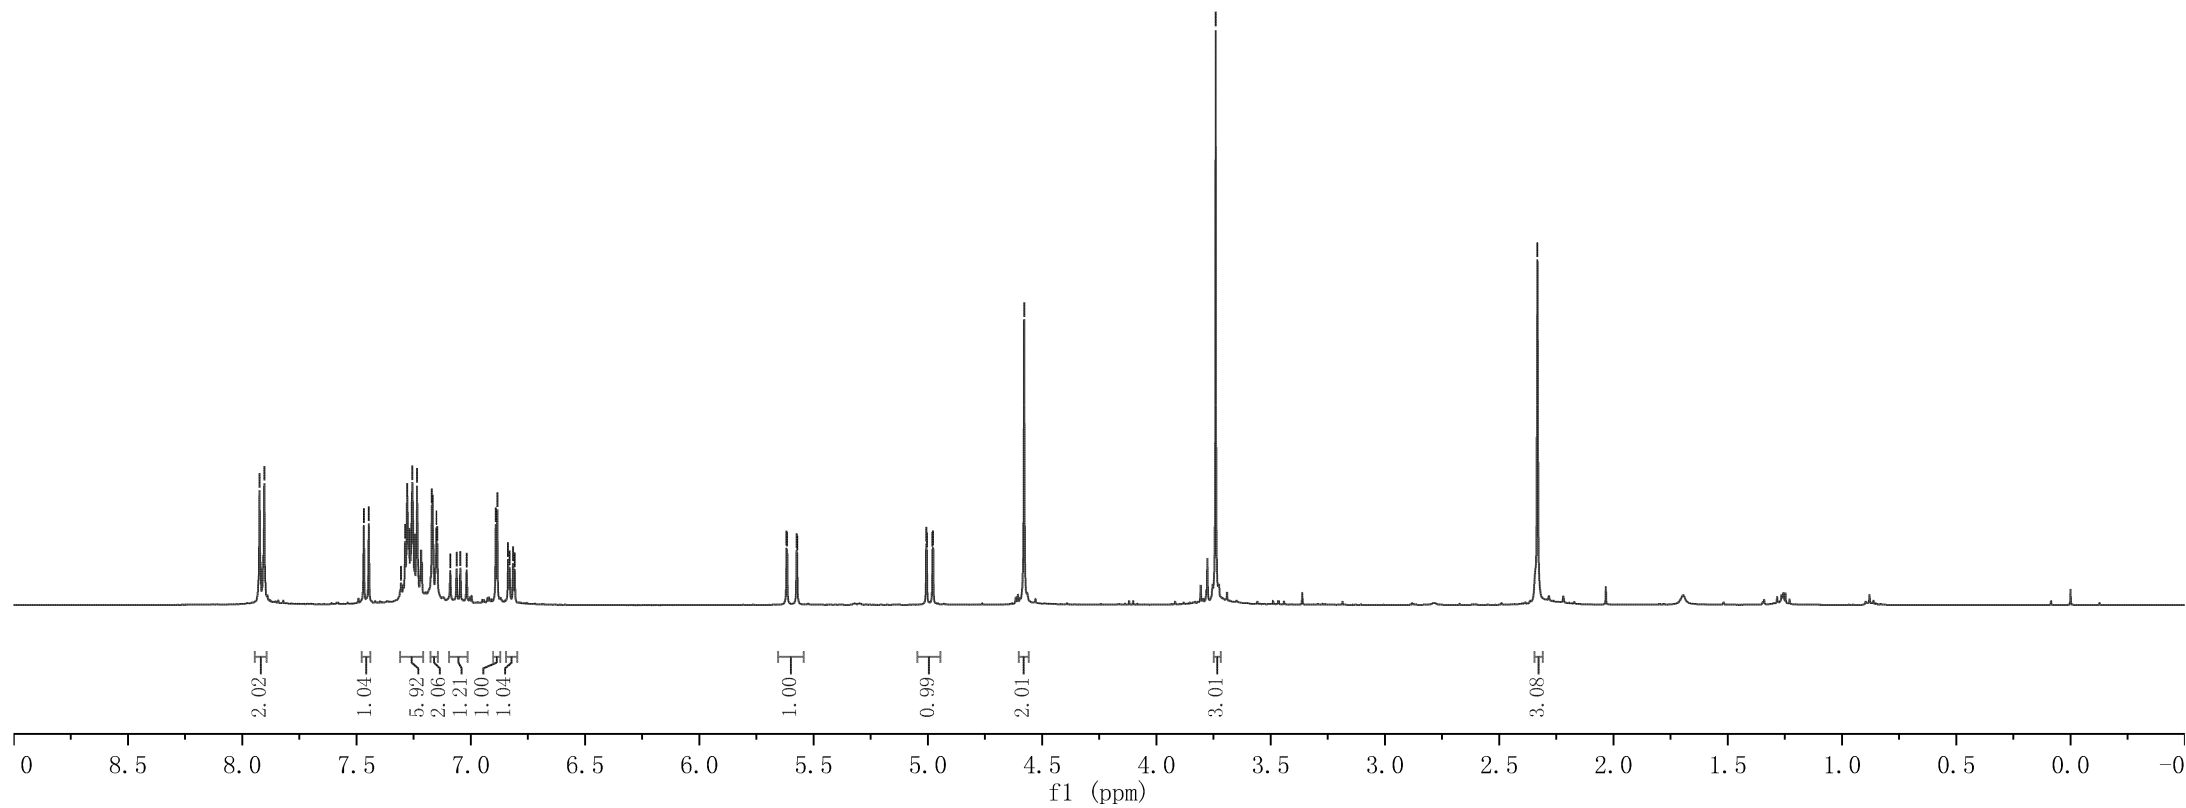

7.924  
7.903  
7.468  
7.446  
7.305  
7.287  
7.279  
7.255  
7.235  
7.170  
7.150  
7.146  
7.089  
7.062  
7.045  
7.018  
6.891  
6.884  
6.837  
6.830  
6.815  
6.808

5.618  
5.616  
5.574  
5.572

5.007  
5.004  
4.979  
4.977

4.579

3.741

2.332

—158.64  
—144.92  
134.20  
134.15  
131.90  
131.61  
129.60  
128.58  
128.21  
128.06  
125.65  
122.18  
121.85  
115.95  
115.44  
113.11

86.60  
86.09  
81.08  
77.32  
77.00  
76.68  
69.67

55.27  
42.83  
21.47

| Parameter                | Value               |
|--------------------------|---------------------|
| 1 Title                  | HFL-4-74-C          |
| 2 Origin                 | Bruker BioSpin GmbH |
| 3 Solvent                | CDC13               |
| 4 Temperature            | 295.8               |
| 5 Number of Scans        | 52                  |
| 6 Acquisition Time       | 1.3631              |
| 7 Acquisition Date       | 2018-04-05T21:42:41 |
| 8 Spectrometer Frequency | 100.59              |
| 9 Spectral Width         | 24038.5             |

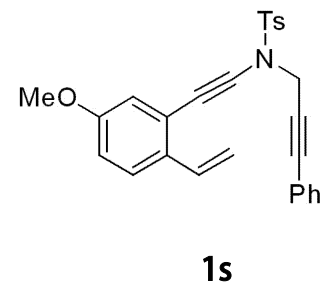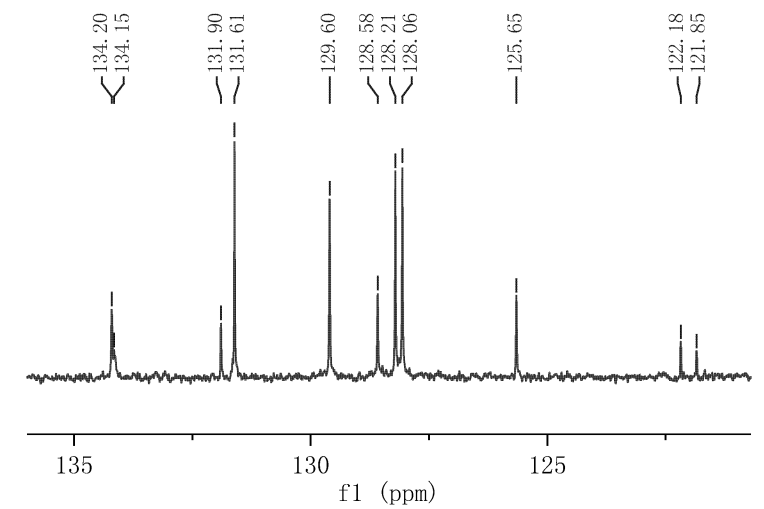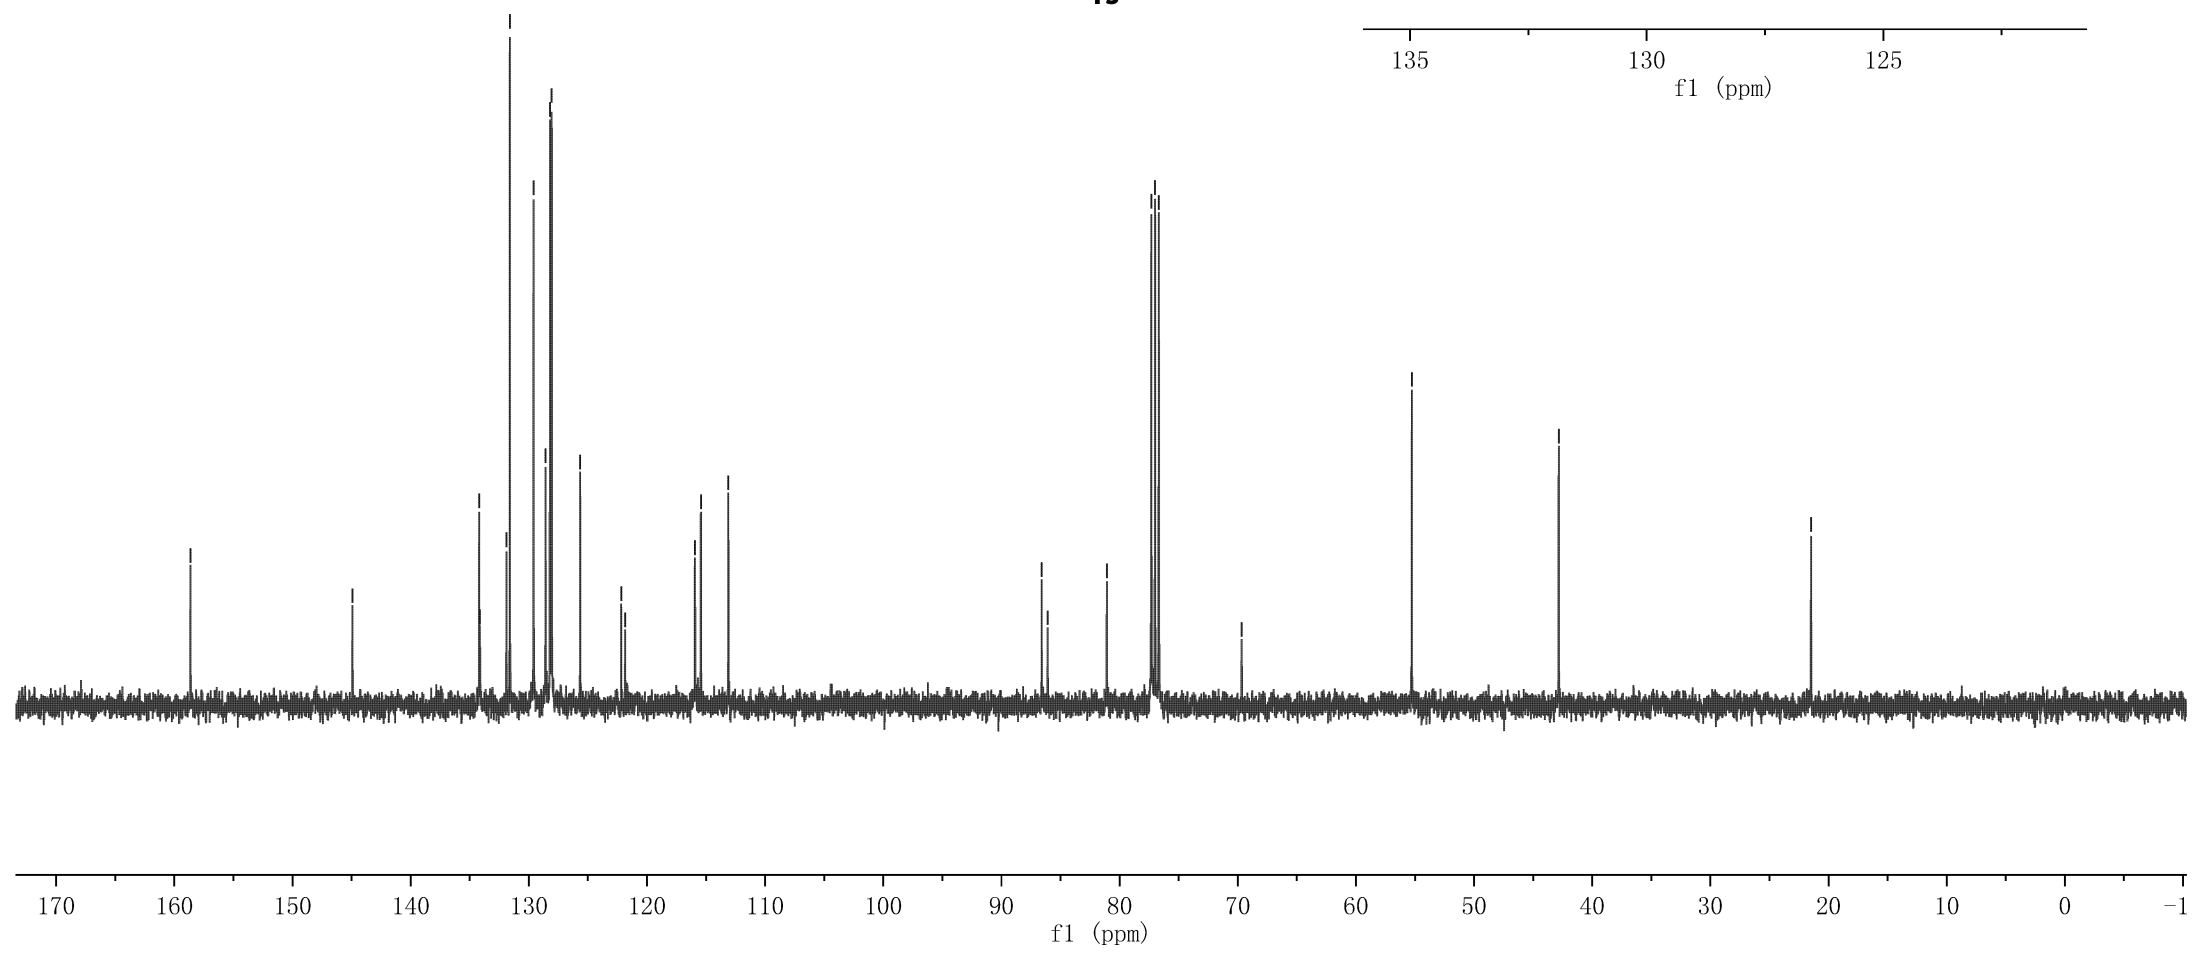

7.913  
7.892  
7.489  
7.474  
7.467  
7.452  
7.279  
7.256  
7.236  
7.214  
7.177  
7.173  
7.157  
7.152  
7.103  
7.075  
7.059  
7.044  
7.031  
6.961  
6.940  
6.933  
6.918  
6.869  
5.625

5.118  
5.090  
4.572

2.331

| Parameter                | Value               |
|--------------------------|---------------------|
| 1 Title                  | HFL-4-107-H         |
| 2 Origin                 | Bruker BioSpin GmbH |
| 3 Solvent                | CDC13               |
| 4 Temperature            | 298.8               |
| 5 Number of Scans        | 4                   |
| 6 Acquisition Time       | 3.9846              |
| 7 Acquisition Date       | 2018-04-13T16:40:03 |
| 8 Spectrometer Frequency | 400.13              |
| 9 Spectral Width         | 8223.7              |

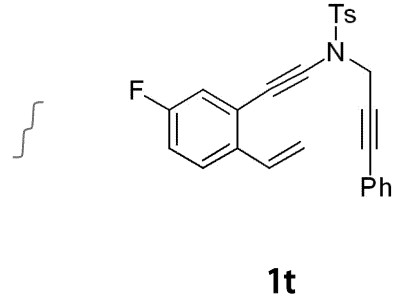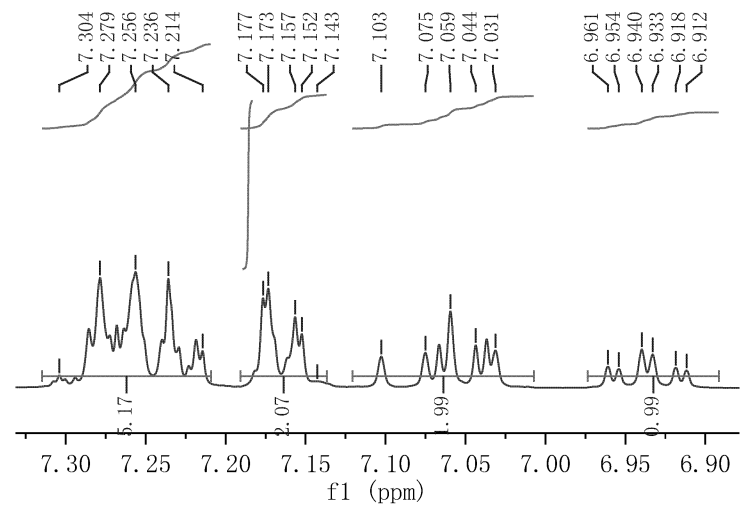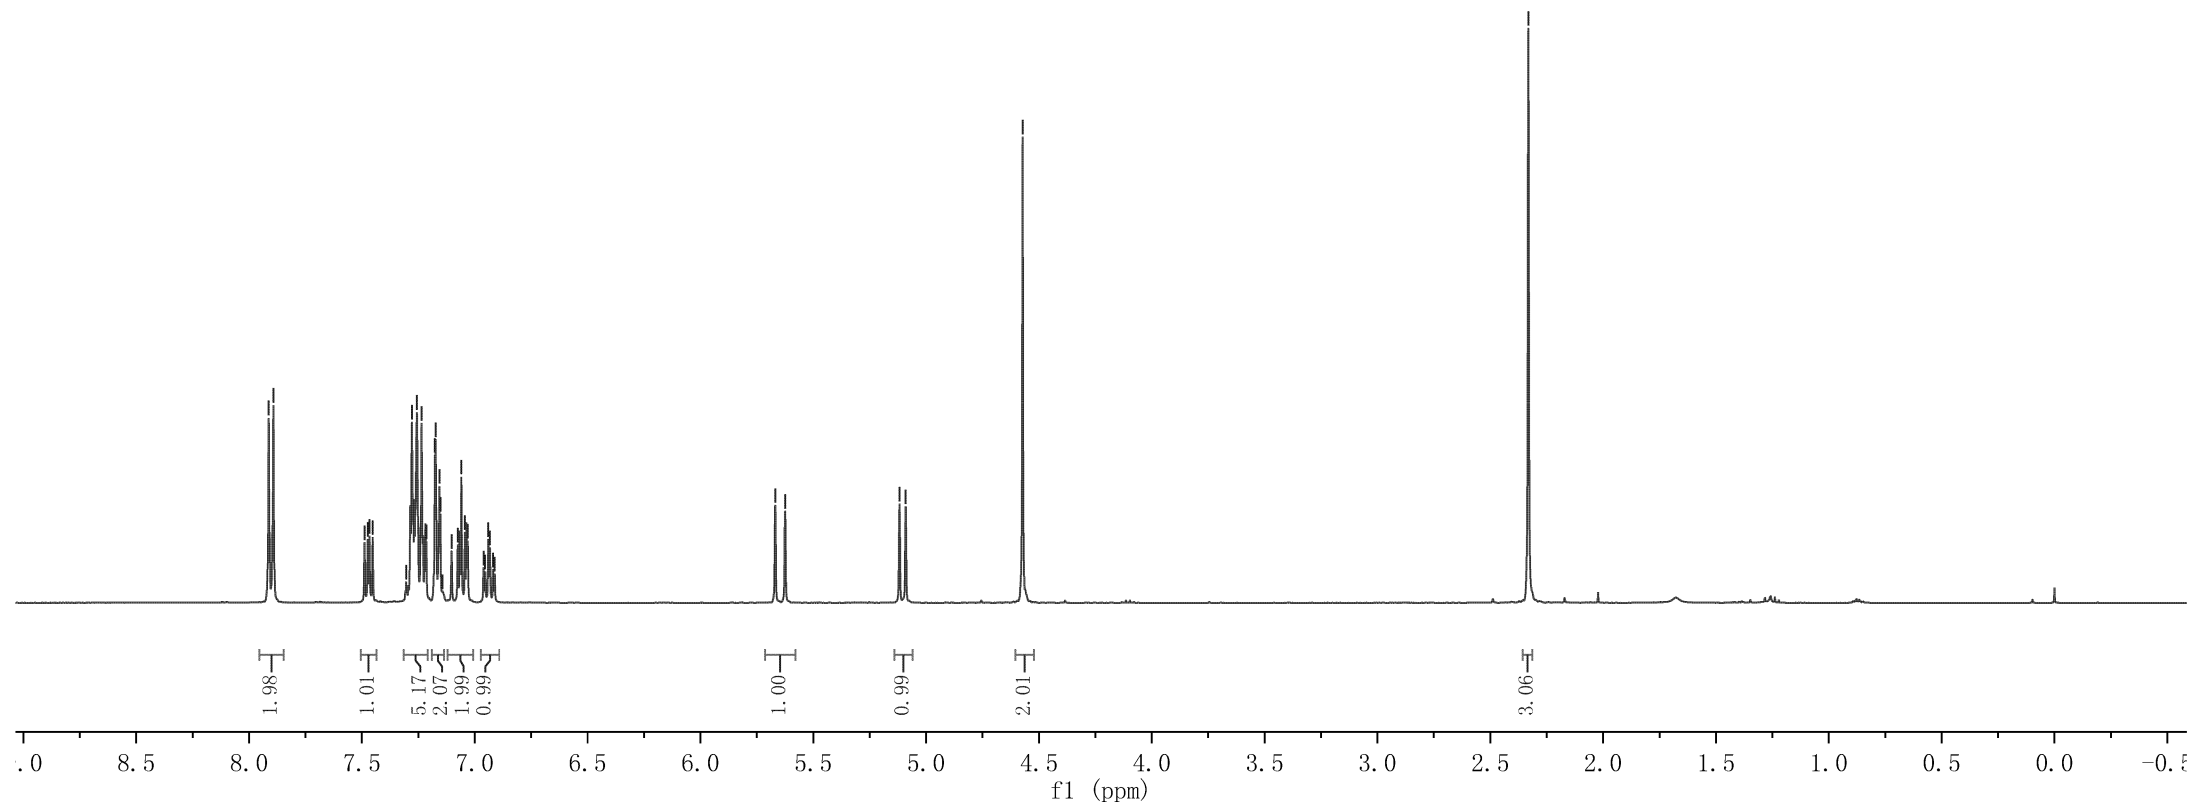

162.78  
160.32  
145.06  
135.11  
135.08  
134.15  
133.80  
131.59  
129.65  
128.65  
128.13  
128.09  
126.29  
126.20  
122.92  
122.82  
121.76  
118.29  
118.06  
115.59  
115.38  
115.04

87.22  
86.67  
80.93  
77.32  
77.00  
76.68

68.93

42.73

21.45

| Parameter                | Value               |
|--------------------------|---------------------|
| 1 Title                  | HFL-4-107-C         |
| 2 Origin                 | Bruker BioSpin GmbH |
| 3 Solvent                | CDCl3               |
| 4 Temperature            | 298.9               |
| 5 Number of Scans        | 29                  |
| 6 Acquisition Time       | 1.3631              |
| 7 Acquisition Date       | 2018-04-13T16:41:57 |
| 8 Spectrometer Frequency | 100.61              |
| 9 Spectral Width         | 24038.5             |

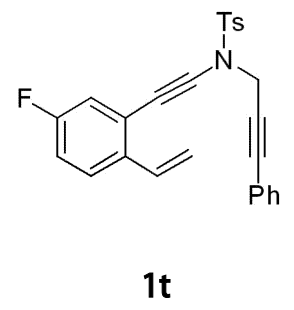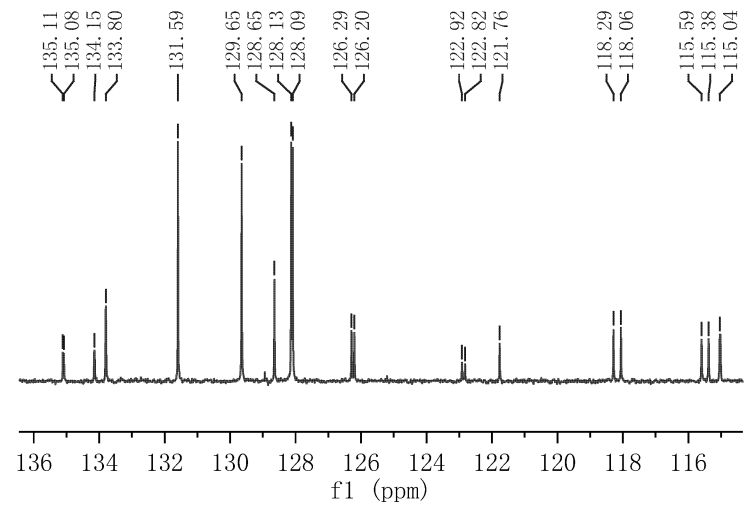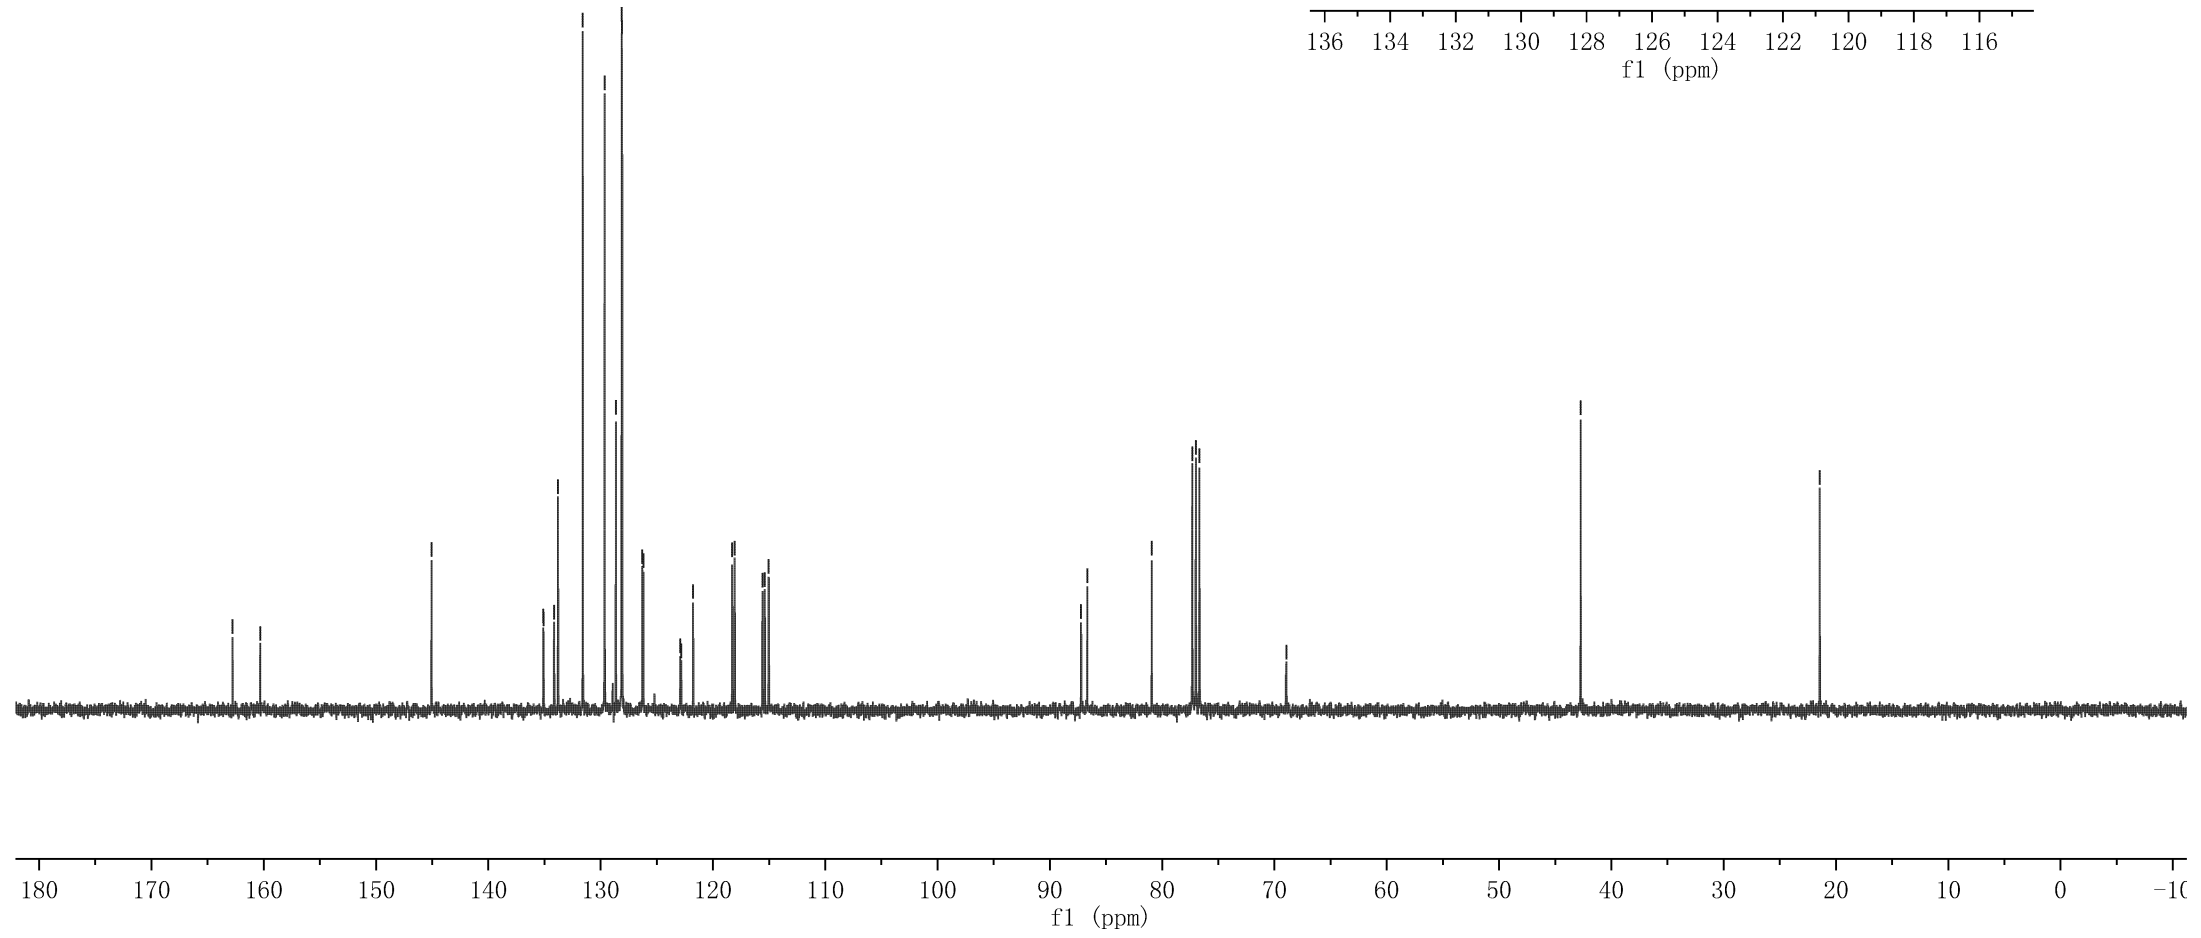



| Parameter                | Value               |
|--------------------------|---------------------|
| 1 Title                  | scy-15-1t           |
| 2 Origin                 | Bruker BioSpin GmbH |
| 3 Solvent                | CDCl3               |
| 4 Temperature            | 295.6               |
| 5 Number of Scans        | 12                  |
| 6 Acquisition Time       | 0.7340              |
| 7 Acquisition Date       | 2022-01-08T17:44:50 |
| 8 Spectrometer Frequency | 376.31              |
| 9 Spectral Width         | 89285.7             |

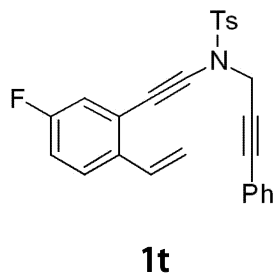

— -114.66

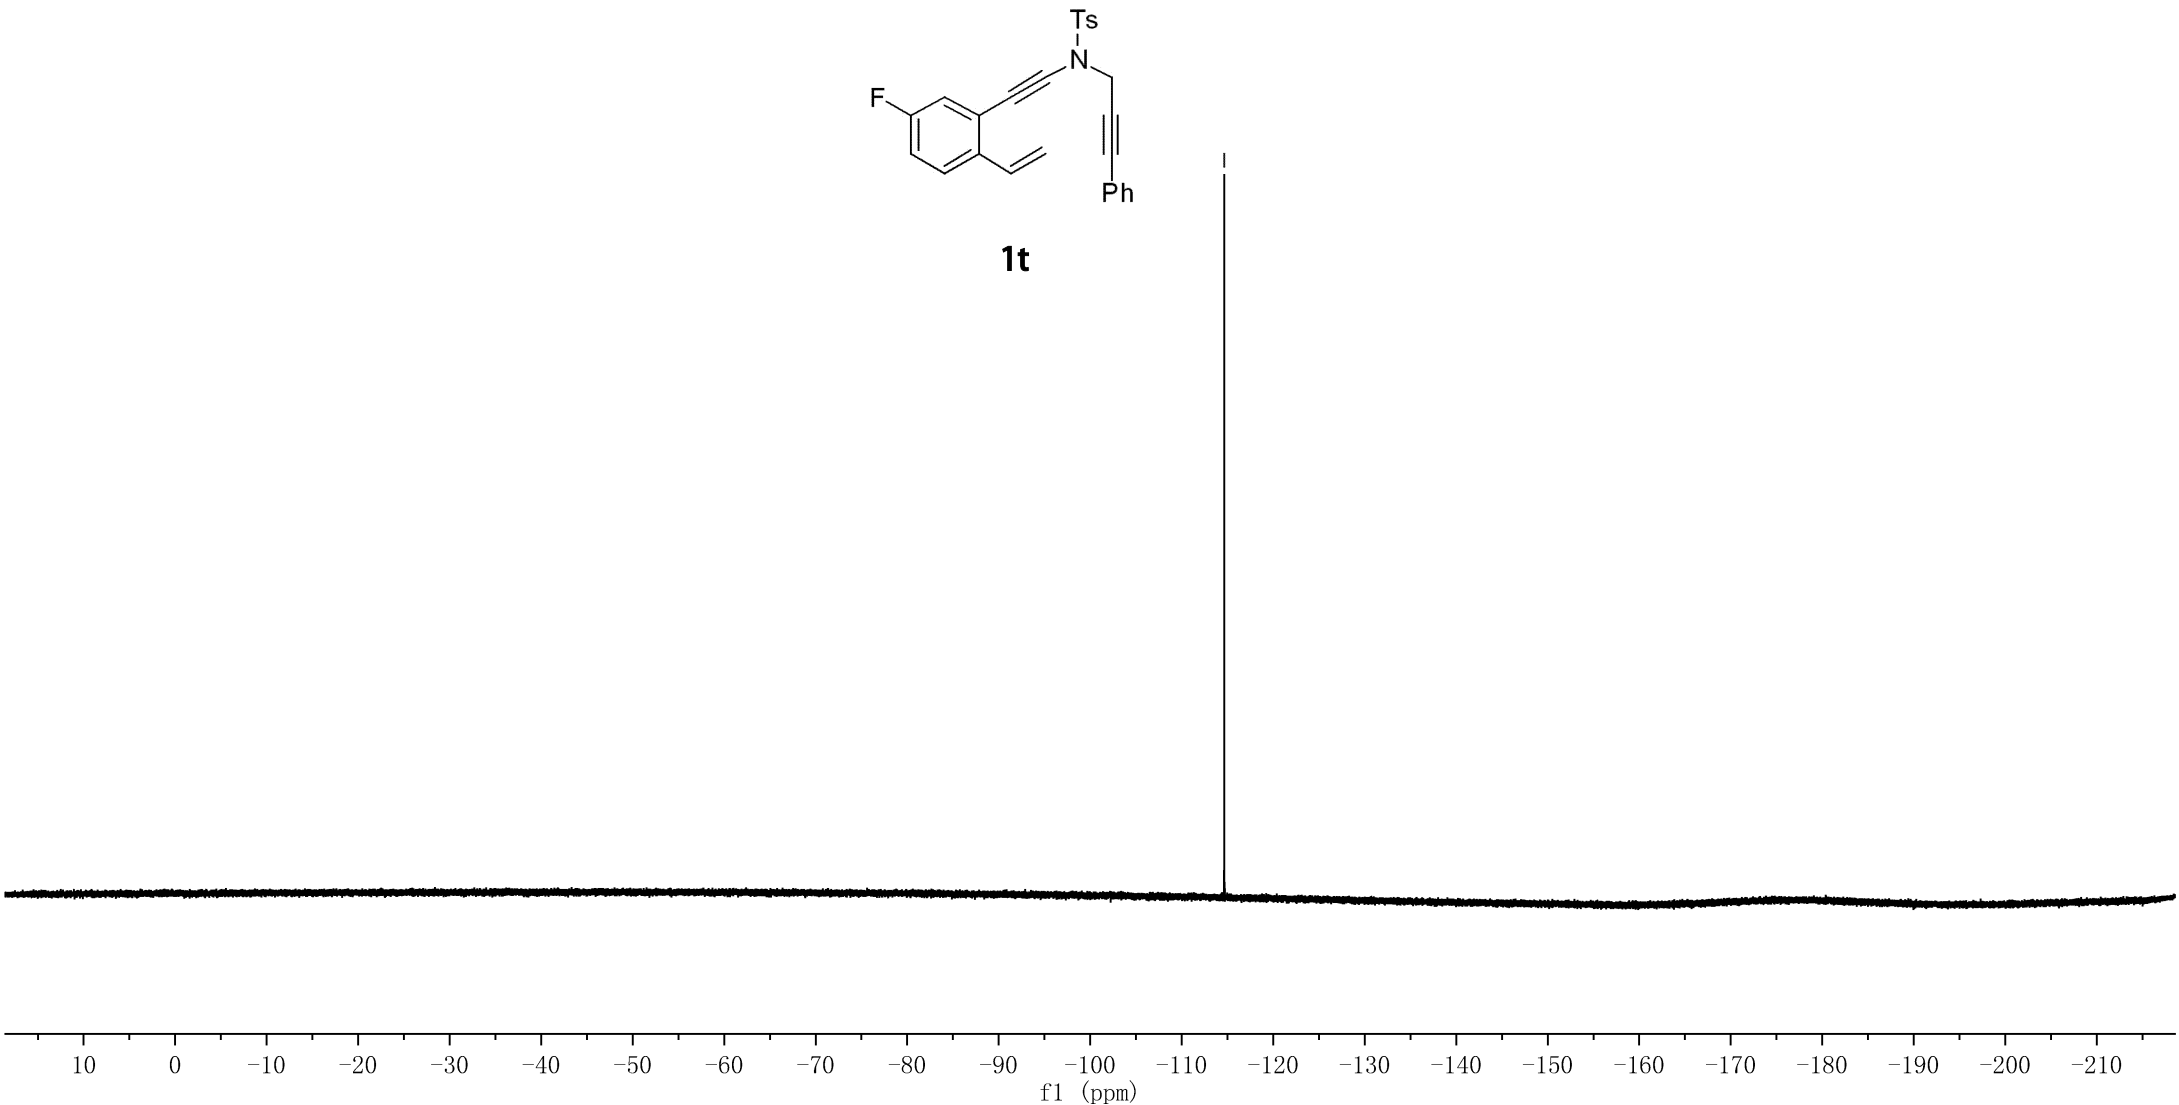

7.921  
7.901  
7.292  
7.267  
7.258  
7.245  
7.224  
7.155  
7.137  
7.091  
7.020  
7.002  
6.852

5.617  
5.573

5.001  
4.974

4.570

3.872  
3.780

2.321

| Parameter                | Value               |
|--------------------------|---------------------|
| 1 Title                  | hf1-4-108-H-4.16    |
| 2 Origin                 | Bruker BioSpin GmbH |
| 3 Solvent                | CDC13               |
| 4 Temperature            | 296.8               |
| 5 Number of Scans        | 4                   |
| 6 Acquisition Time       | 3.9846              |
| 7 Acquisition Date       | 2018-04-16T10:15:21 |
| 8 Spectrometer Frequency | 400.13              |
| 9 Spectral Width         | 8223.7              |

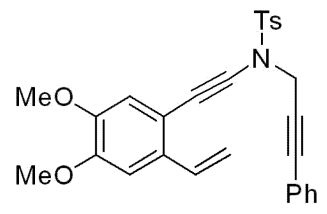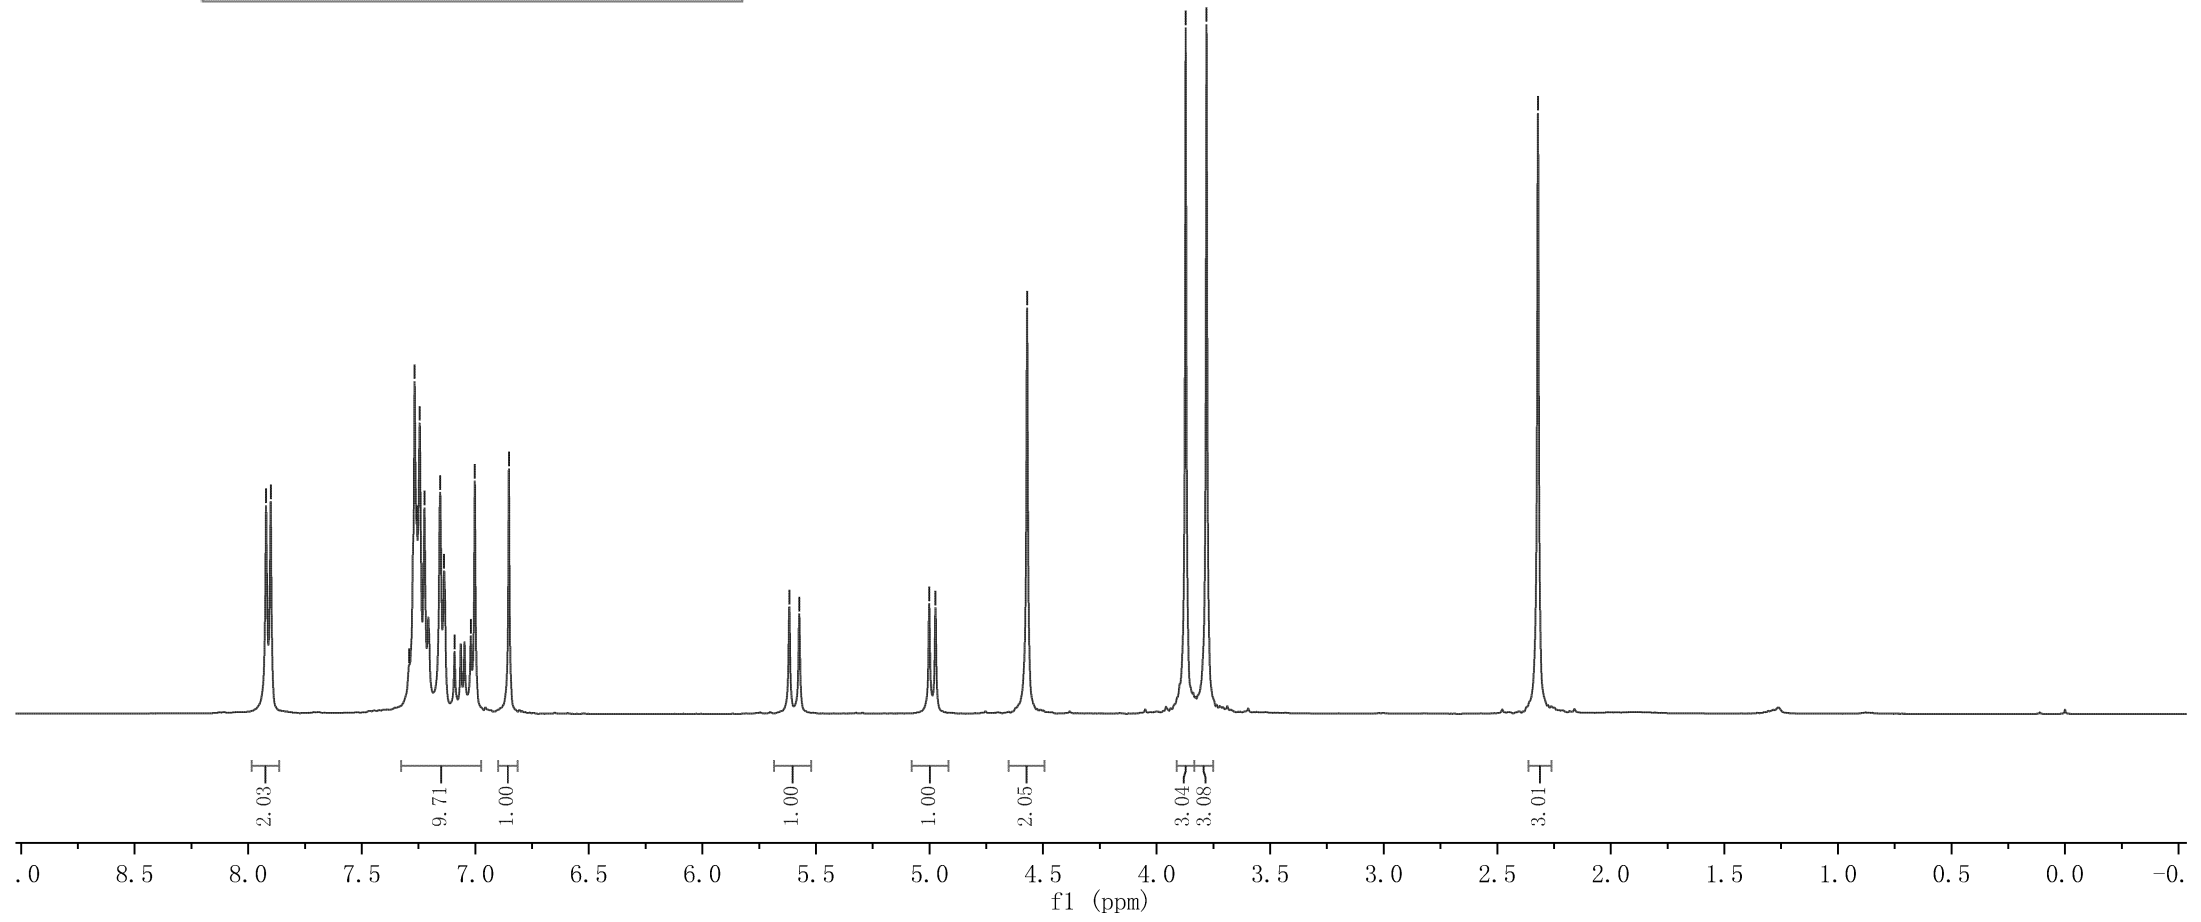

149.40  
148.31  
144.69

134.34  
133.98  
132.89  
131.40  
129.39  
128.41  
128.08  
127.90

121.71

114.49  
113.35  
113.05

106.53

86.35  
84.78  
81.15

77.32  
77.00  
76.68

69.19

55.63  
55.60

42.75

21.28

| Parameter                | Value               |
|--------------------------|---------------------|
| 1 Title                  | hf1-4-108-C-4.16    |
| 2 Origin                 | Bruker BioSpin GmbH |
| 3 Solvent                | CDC13               |
| 4 Temperature            | 296.8               |
| 5 Number of Scans        | 5                   |
| 6 Acquisition Time       | 1.3631              |
| 7 Acquisition Date       | 2018-04-16T10:17:35 |
| 8 Spectrometer Frequency | 100.61              |
| 9 Spectral Width         | 24038.5             |

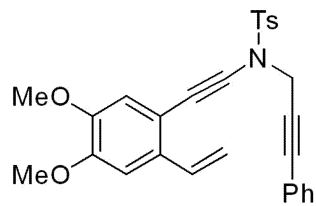

**1u**

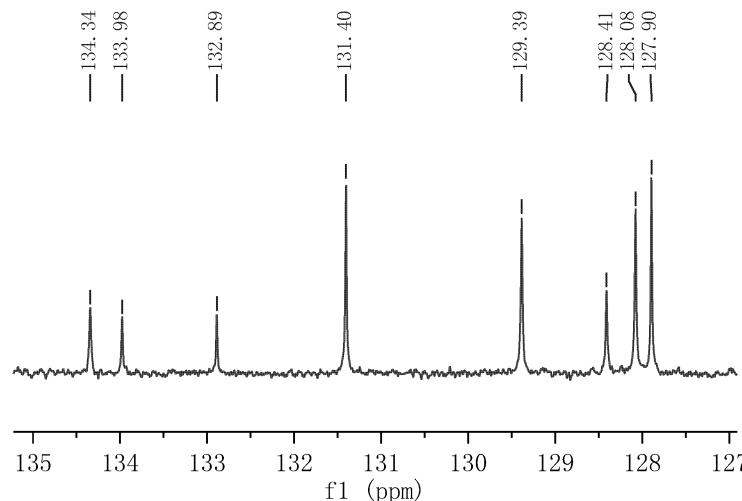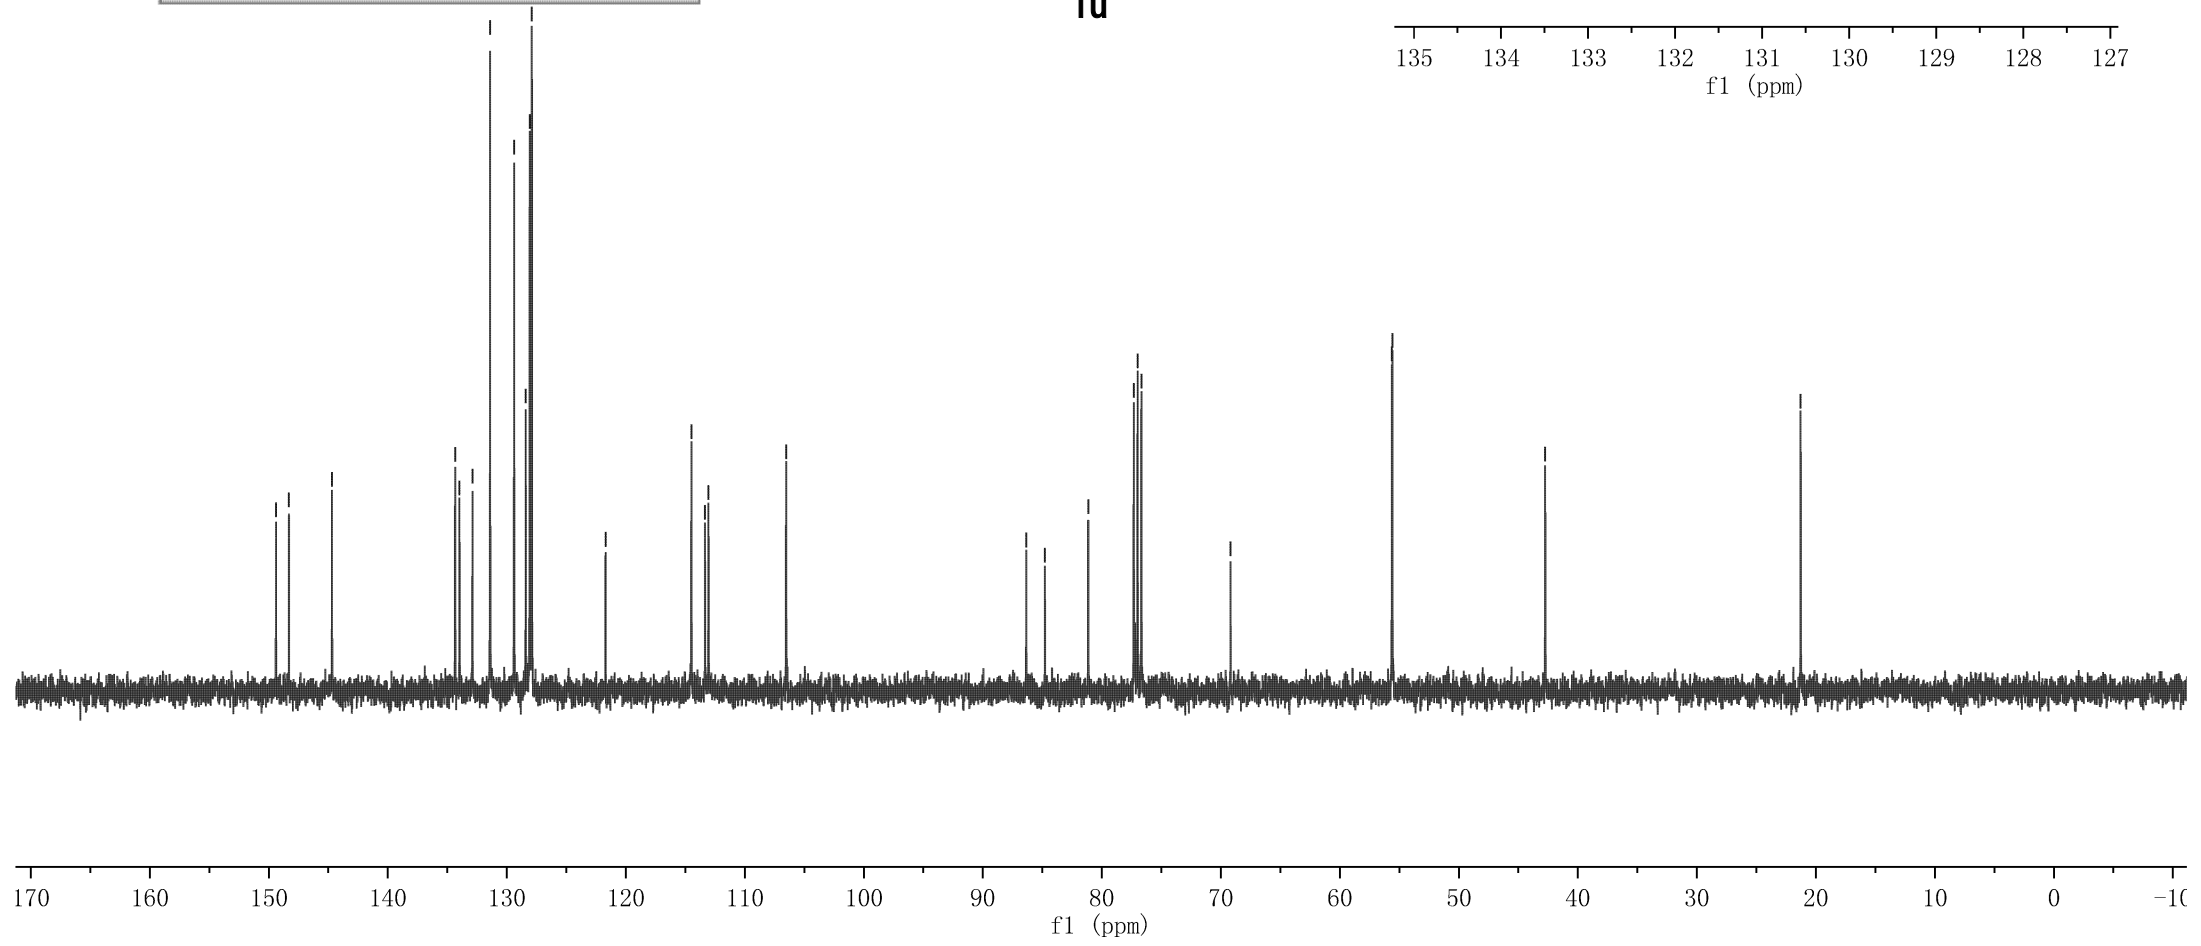

7.801  
7.780  
7.287  
7.268  
7.152  
7.134  
7.112  
7.087  
7.068  
7.043  
7.008  
6.991  
6.987

5.018  
5.014  
5.010  
4.994

4.413

2.178  
1.978

| Parameter                | Value               |
|--------------------------|---------------------|
| 1 Title                  | HFL-4-140-H         |
| 2 Origin                 | Bruker BioSpin GmbH |
| 3 Solvent                | CDC13               |
| 4 Temperature            | 296.3               |
| 5 Number of Scans        | 7                   |
| 6 Acquisition Time       | 3.9846              |
| 7 Acquisition Date       | 2018-04-23T14:41:08 |
| 8 Spectrometer Frequency | 400.03              |
| 9 Spectral Width         | 8223.7              |

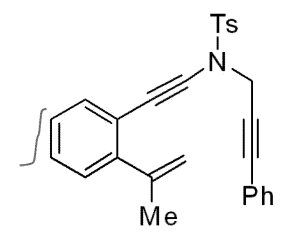

**1v**

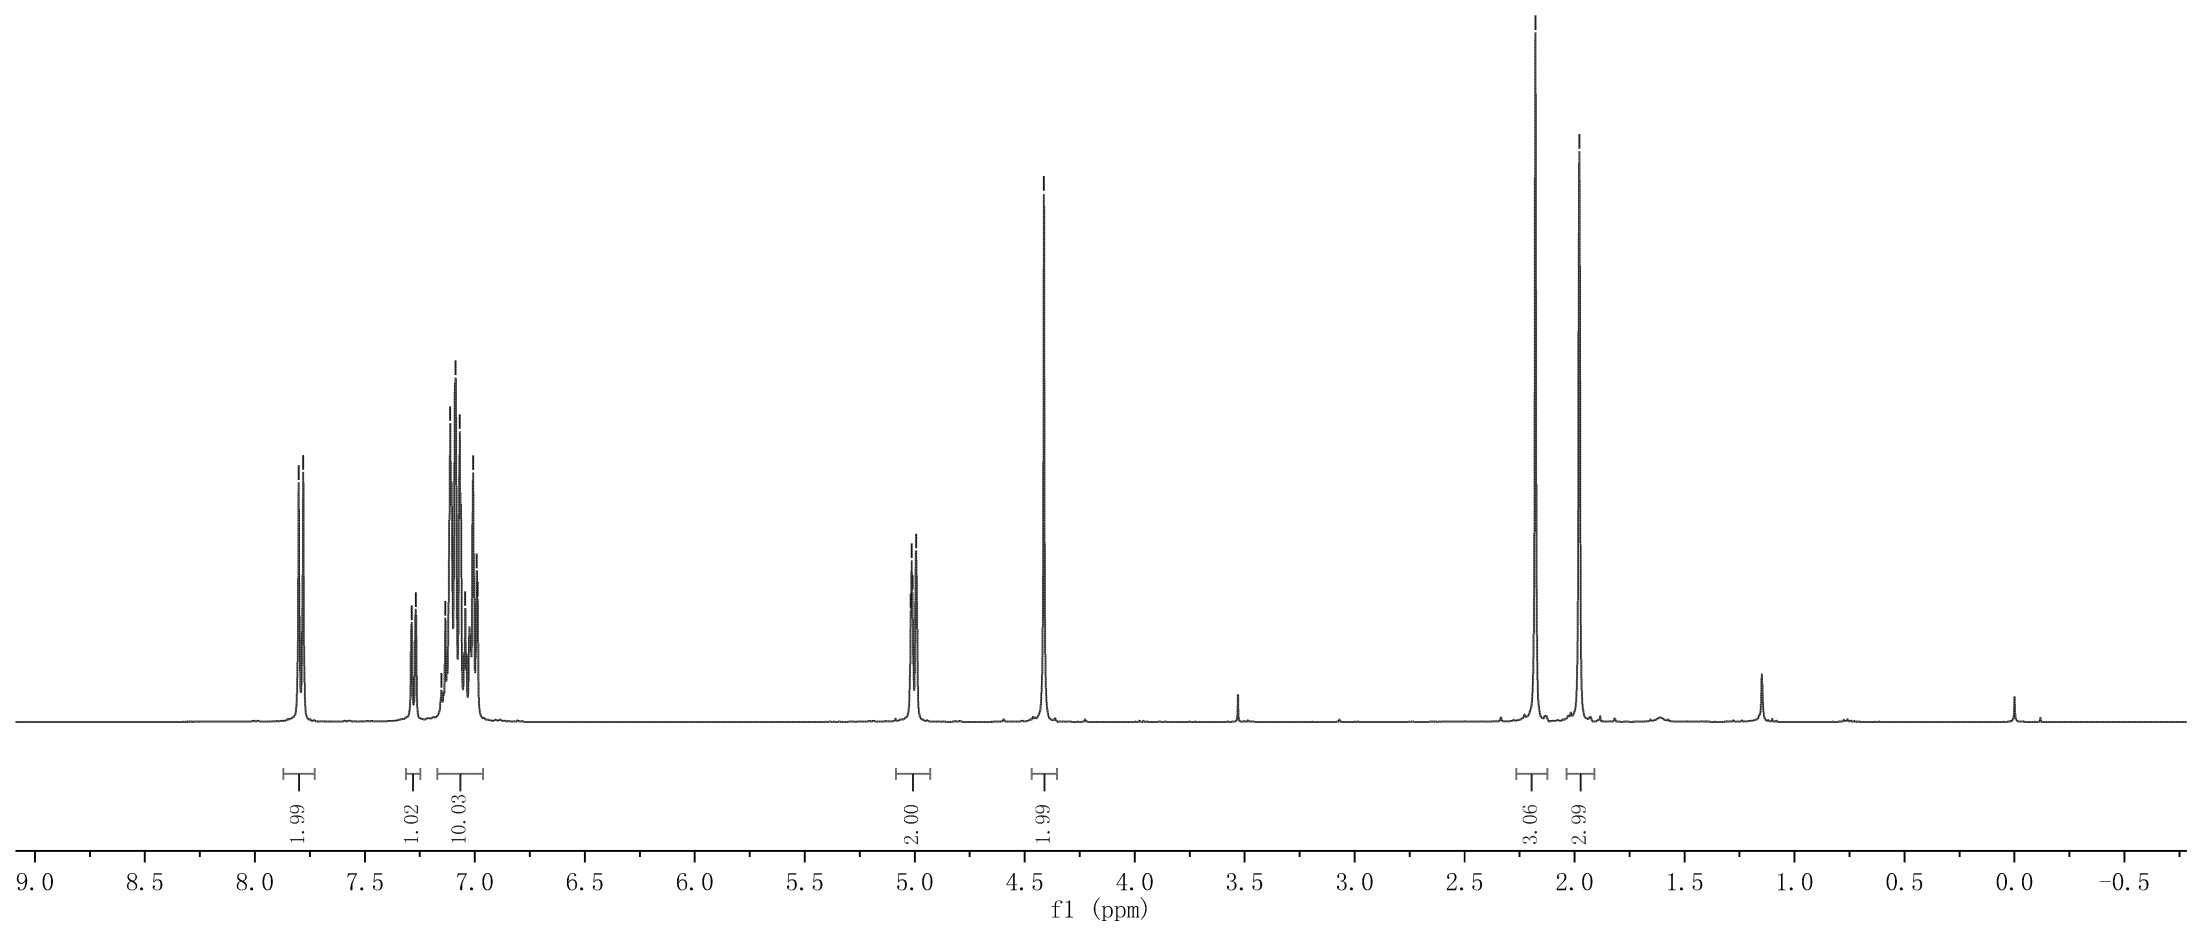

145.30  
144.70  
144.62  
134.28  
132.52  
131.44  
129.42  
128.44  
128.03  
127.94  
127.70  
127.63  
126.56  
121.81  
119.98  
115.58

86.24  
84.95  
81.18  
77.32  
77.00  
76.68  
70.43

42.66

23.18  
21.34

|   | Parameter              | Value               |
|---|------------------------|---------------------|
| 1 | Title                  | HFL-4-140-C         |
| 2 | Origin                 | Bruker BioSpin GmbH |
| 3 | Solvent                | CDC13               |
| 4 | Temperature            | 296.4               |
| 5 | Number of Scans        | 8                   |
| 6 | Acquisition Time       | 1.3631              |
| 7 | Acquisition Date       | 2018-04-23T14:43:19 |
| 8 | Spectrometer Frequency | 100.59              |
| 9 | Spectral Width         | 24038.5             |

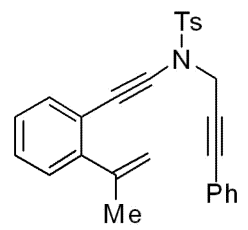

**1v**

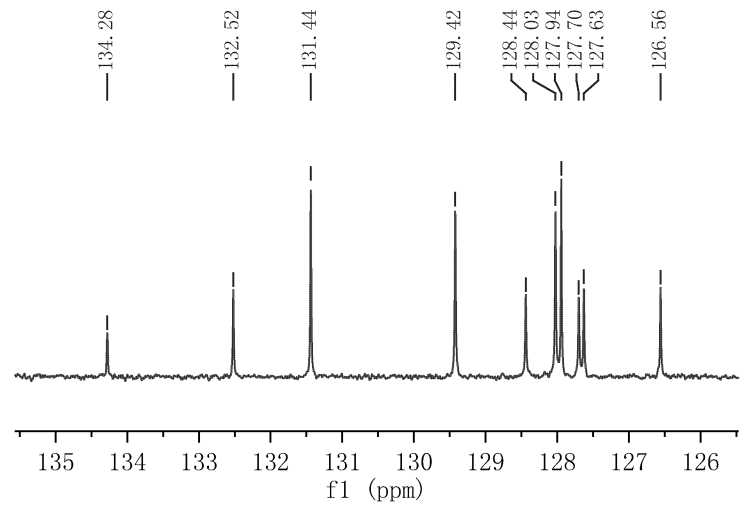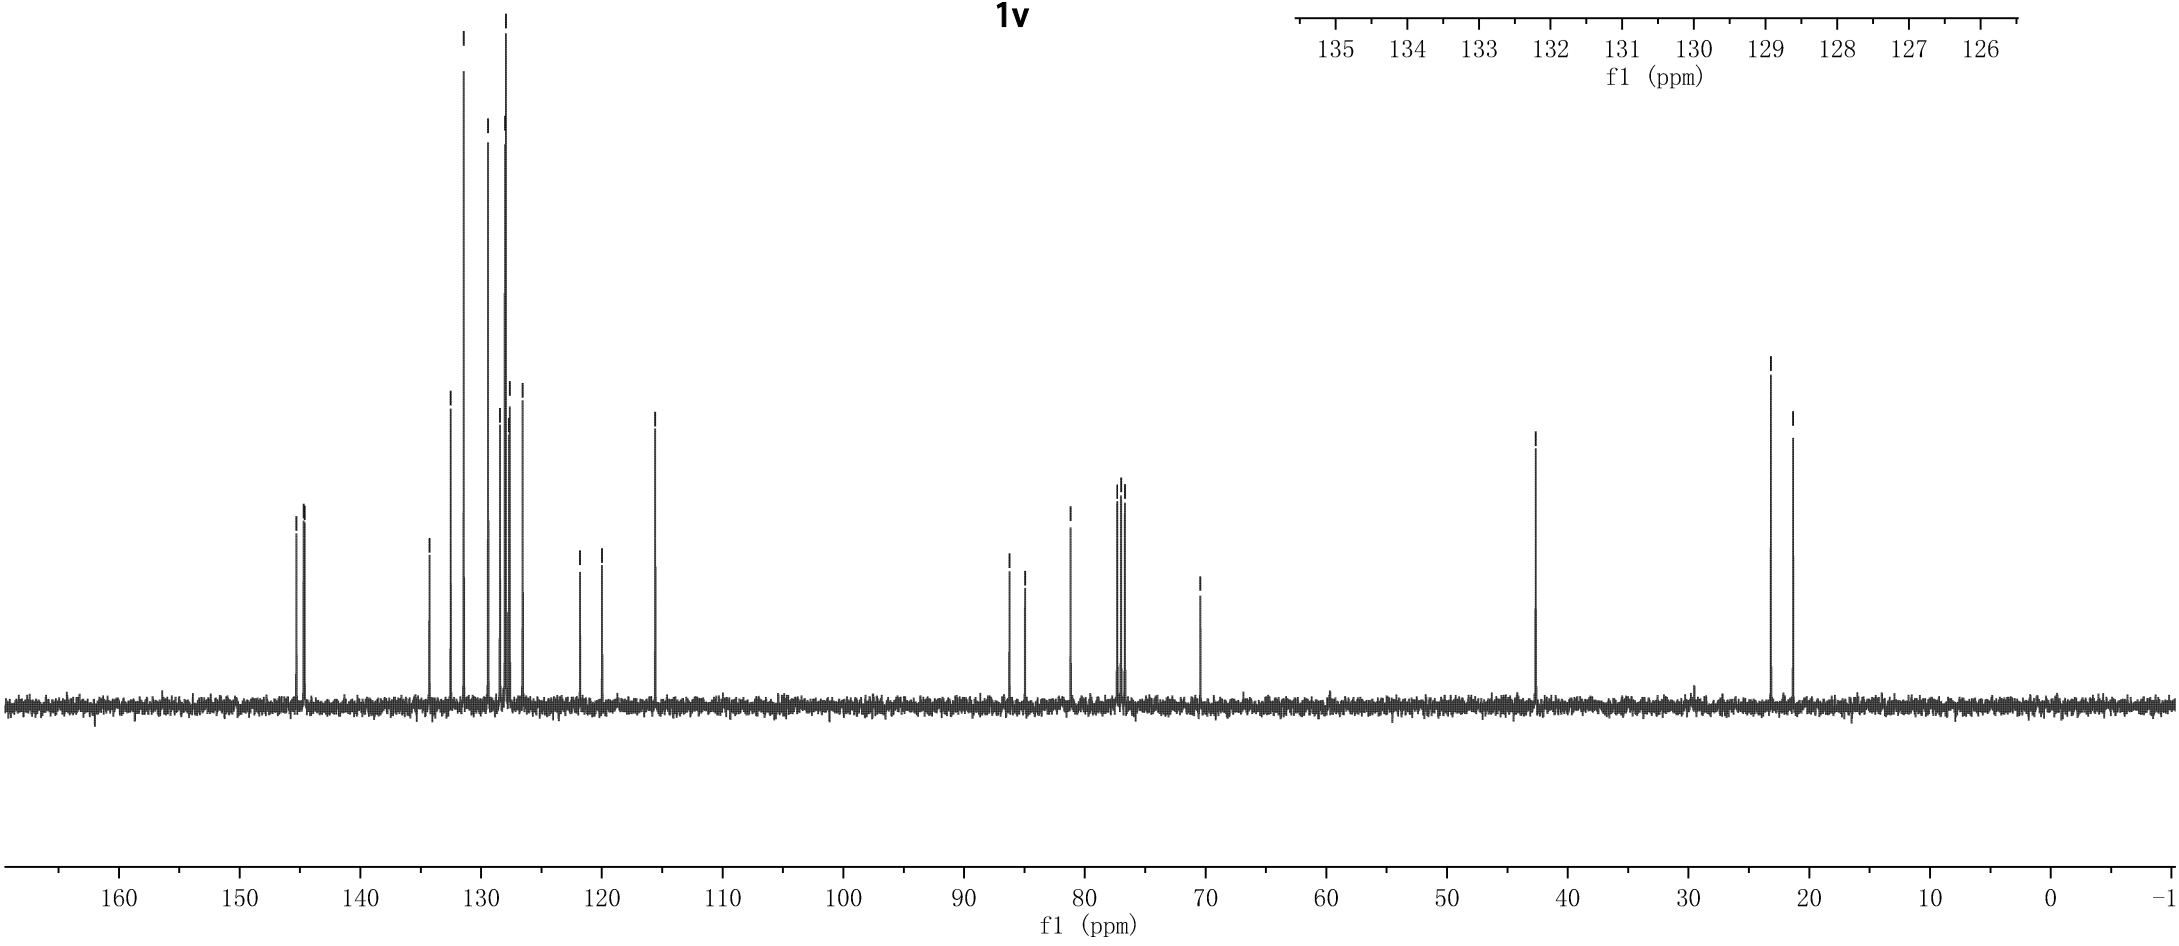

| Parameter                | Value               |
|--------------------------|---------------------|
| 1 Title                  | SCY-13-25           |
| 2 Origin                 | Bruker BioSpin GmbH |
| 3 Solvent                | CDC13               |
| 4 Temperature            | 298.0               |
| 5 Number of Scans        | 8                   |
| 6 Acquisition Time       | 4.0894              |
| 7 Acquisition Date       | 2021-01-06T15:27:53 |
| 8 Spectrometer Frequency | 400.13              |
| 9 Spectral Width         | 8012.8              |

7.904  
7.883  
7.692  
7.672  
7.643  
7.603  
7.502  
7.479  
7.427  
7.408  
7.312  
7.277  
7.260  
7.192  
7.162  
7.143  
7.122

4.620

2.234

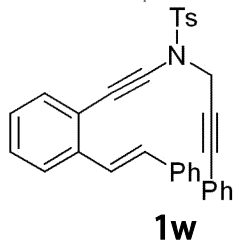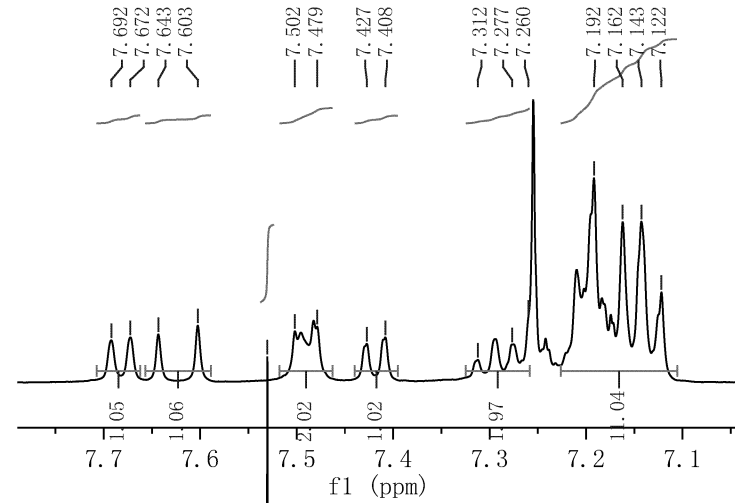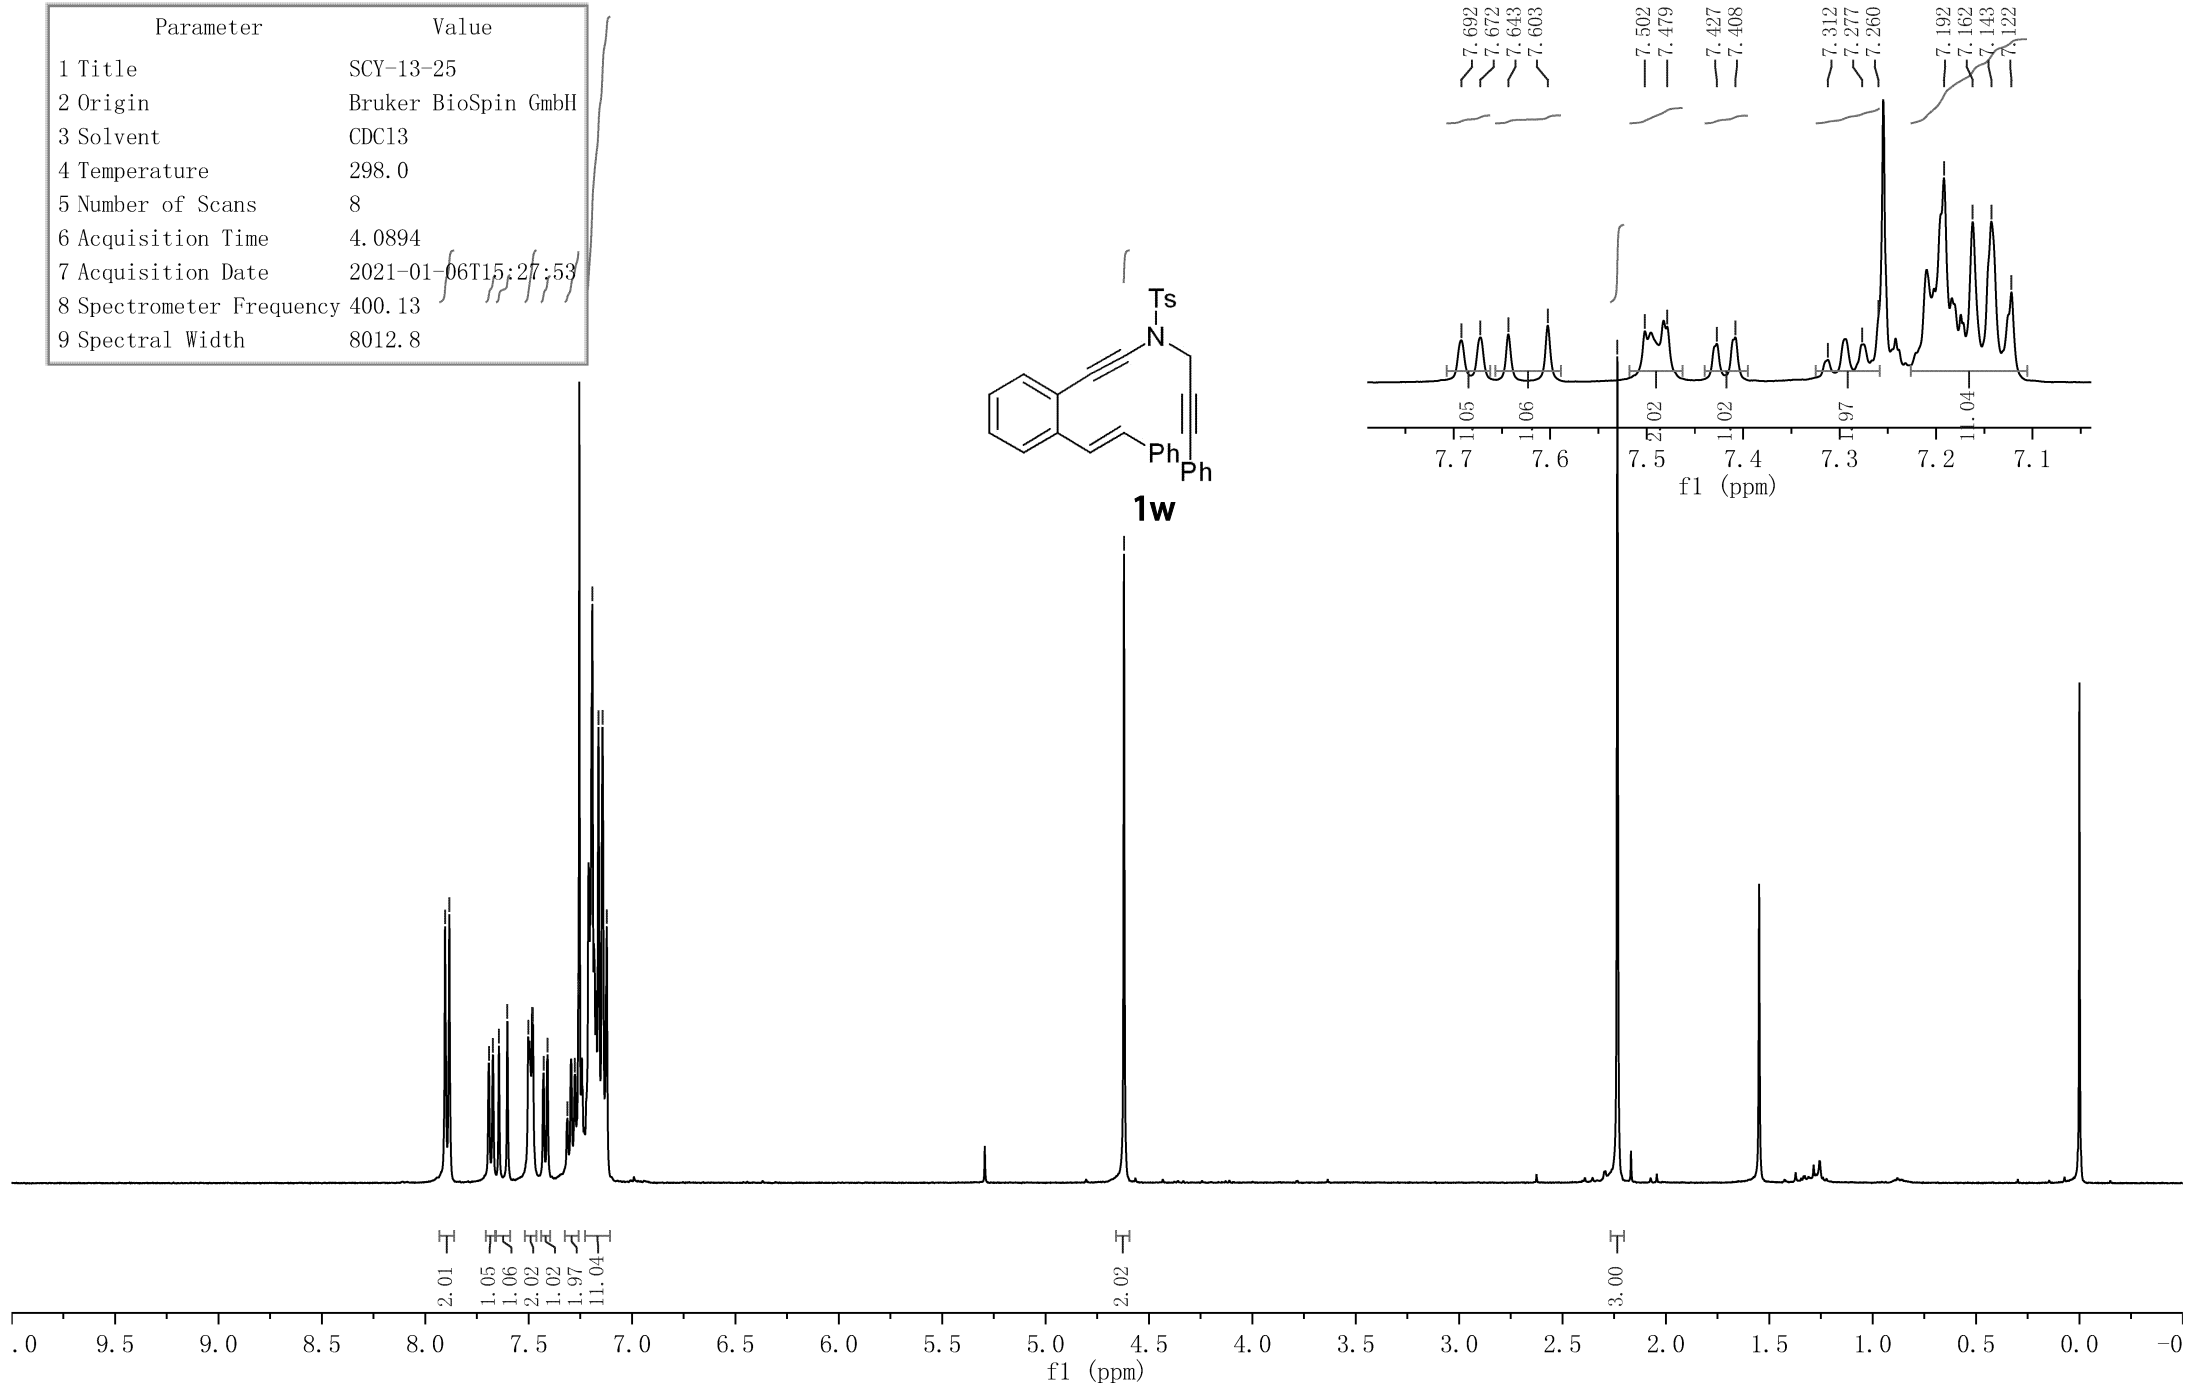

| Parameter                | Value               |
|--------------------------|---------------------|
| 1 Title                  | SCY-13-25-1         |
| 2 Origin                 | Bruker BioSpin GmbH |
| 3 Solvent                | CDC13               |
| 4 Temperature            | 300.0               |
| 5 Number of Scans        | 37                  |
| 6 Acquisition Time       | 1.3631              |
| 7 Acquisition Date       | 2022-03-06T11:06:02 |
| 8 Spectrometer Frequency | 100.61              |
| 9 Spectral Width         | 24038.5             |

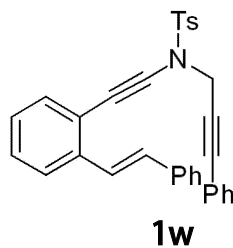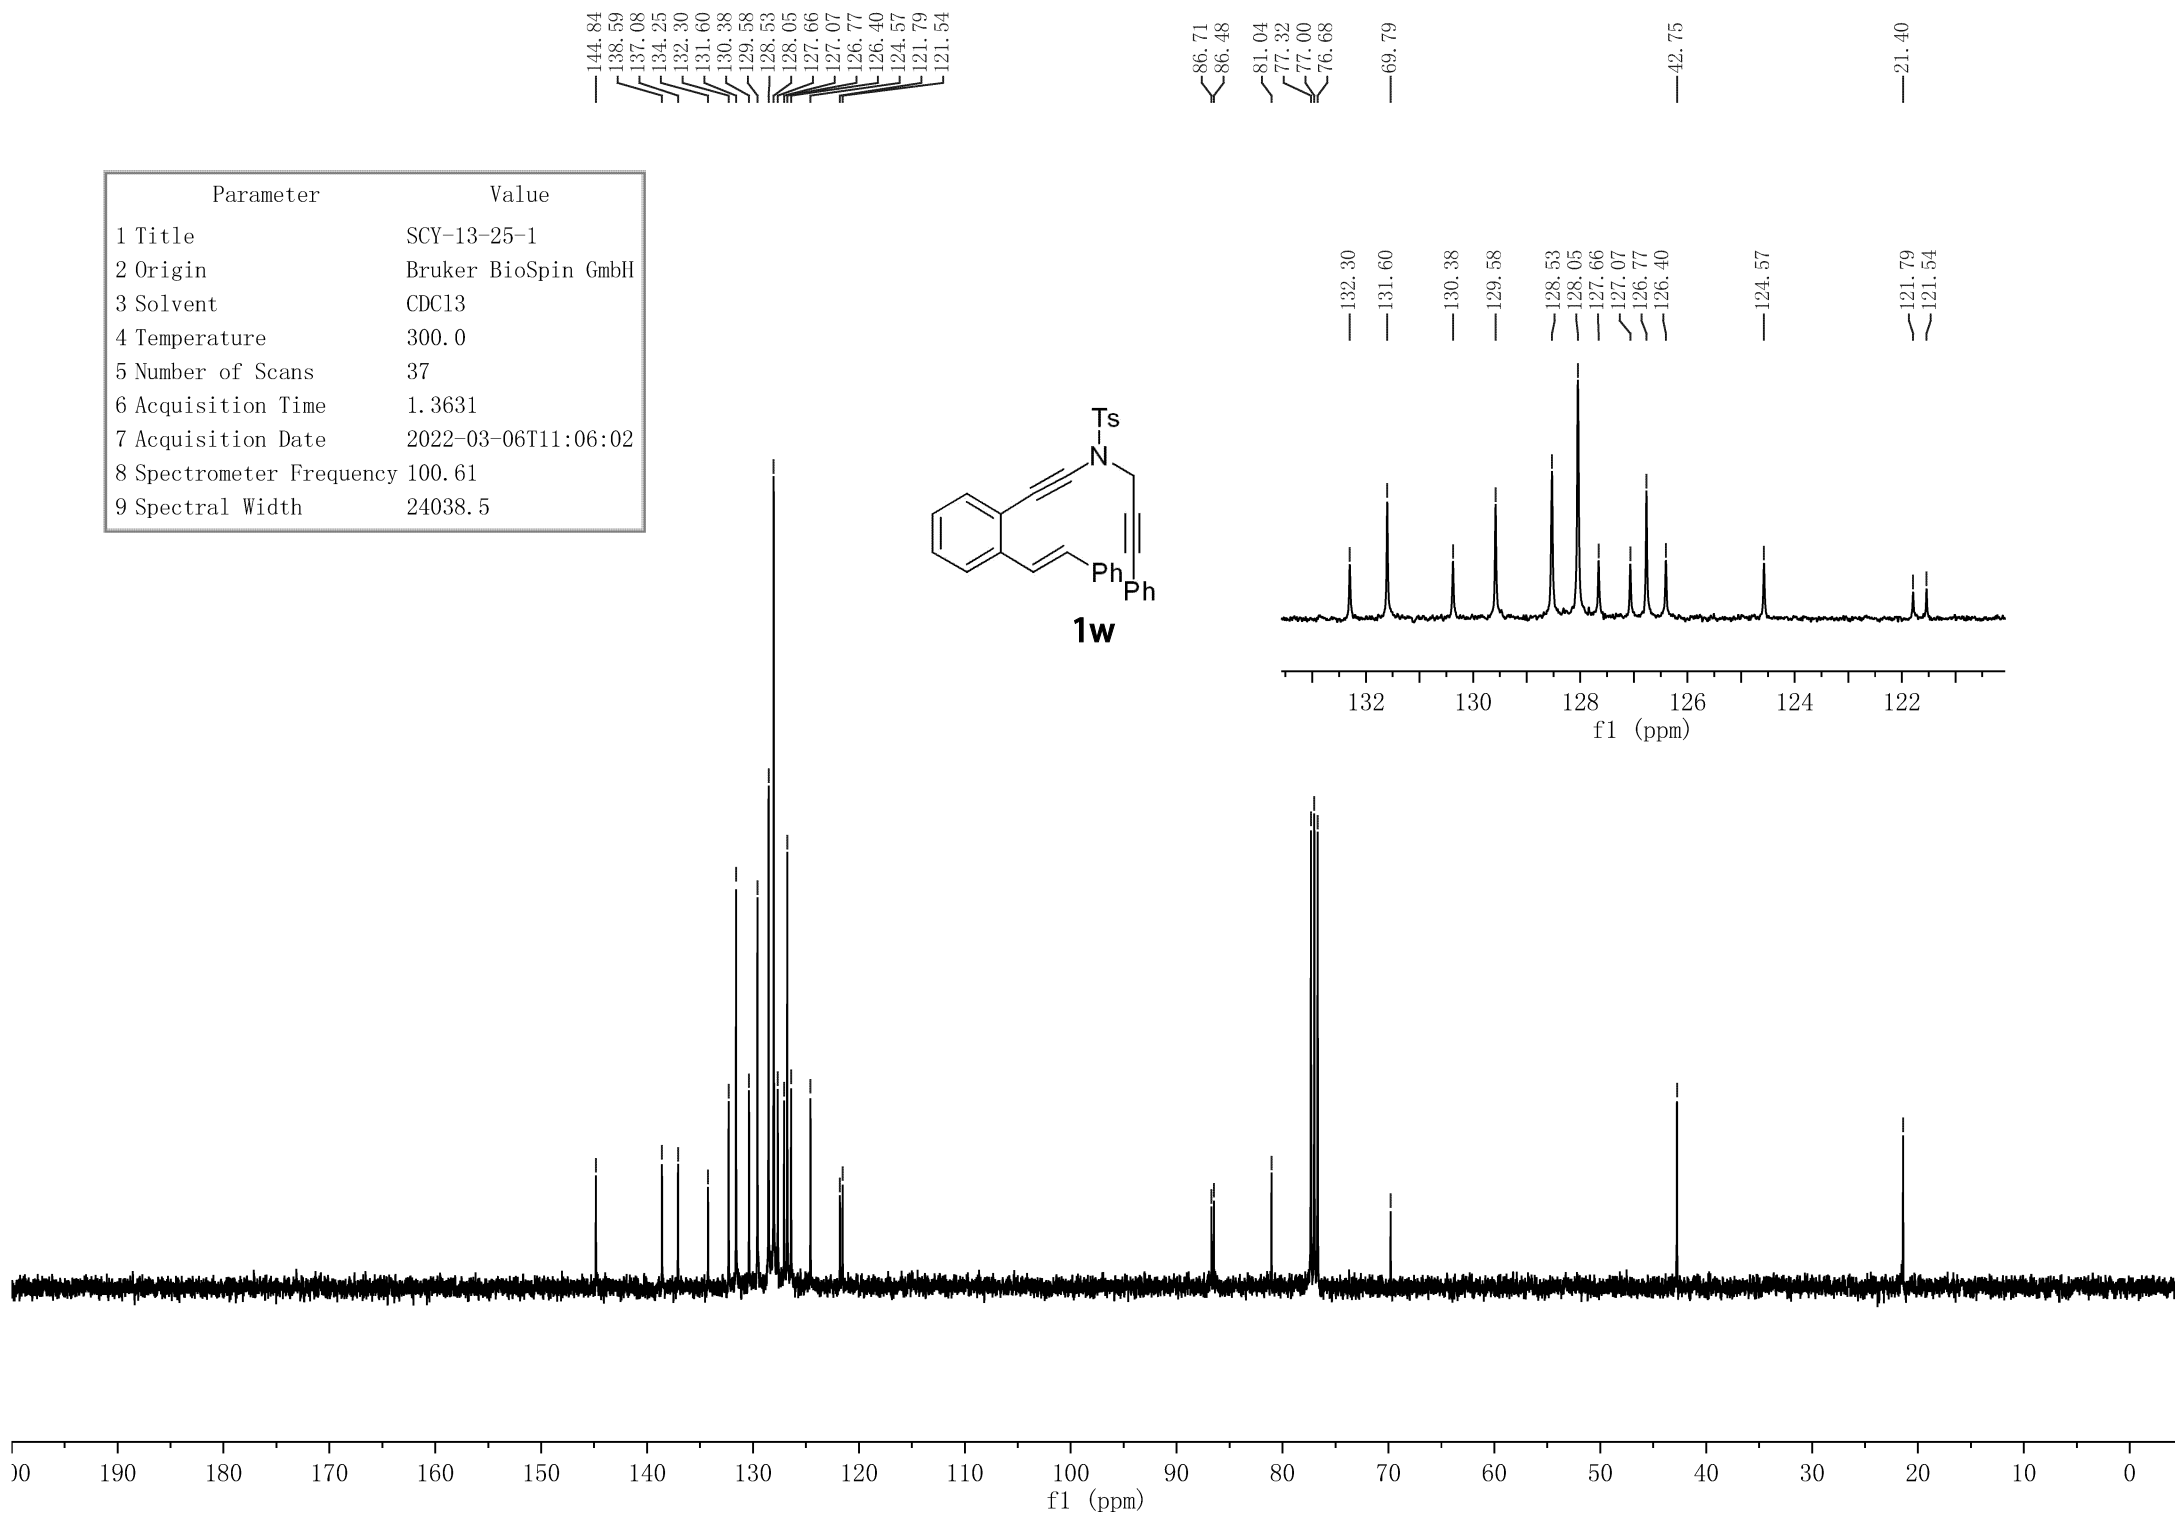

| Parameter                | Value               |
|--------------------------|---------------------|
| 1 Title                  | SCY-13-25-1         |
| 2 Origin                 | Bruker BioSpin GmbH |
| 3 Solvent                | CDCl3               |
| 4 Temperature            | 300.0               |
| 5 Number of Scans        | 17                  |
| 6 Acquisition Time       | 1.3631              |
| 7 Acquisition Date       | 2022-03-06T11:09:13 |
| 8 Spectrometer Frequency | 100.61              |
| 9 Spectral Width         | 24038.5             |

132.30  
131.60  
130.38  
129.58  
128.53  
128.05  
127.66  
127.07  
126.77  
126.40  
124.57

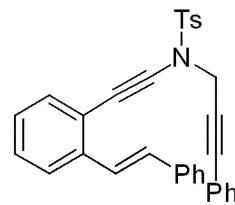

**1w**

42.75

21.40

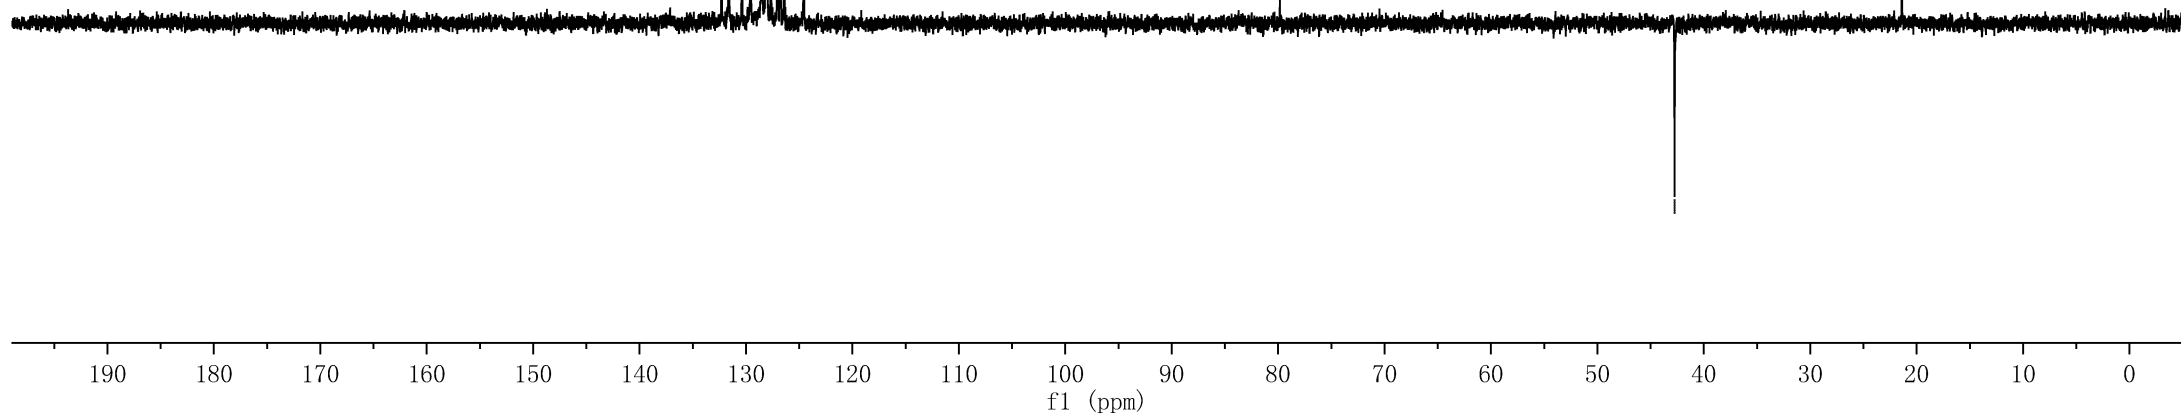



8.498  
8.479

7.957  
7.936

7.417  
7.397  
7.348  
7.327  
7.314  
7.294  
7.270  
7.239  
7.215  
7.187

4.506  
4.458

4.131  
4.083

2.852  
2.838  
2.829

2.815

2.394

2.296

2.285

2.272

2.262

0.421

0.410

0.396

| Parameter                | Value               |
|--------------------------|---------------------|
| 1 Title                  | hf1-5-53-h          |
| 2 Origin                 | Bruker BioSpin GmbH |
| 3 Solvent                | CDC13               |
| 4 Temperature            | 297.6               |
| 5 Number of Scans        | 7                   |
| 6 Acquisition Time       | 3.9846              |
| 7 Acquisition Date       | 2018-06-07T21:14:25 |
| 8 Spectrometer Frequency | 400.13              |
| 9 Spectral Width         | 8223.7              |

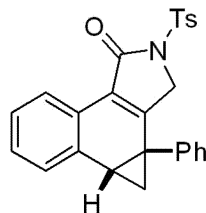

2a

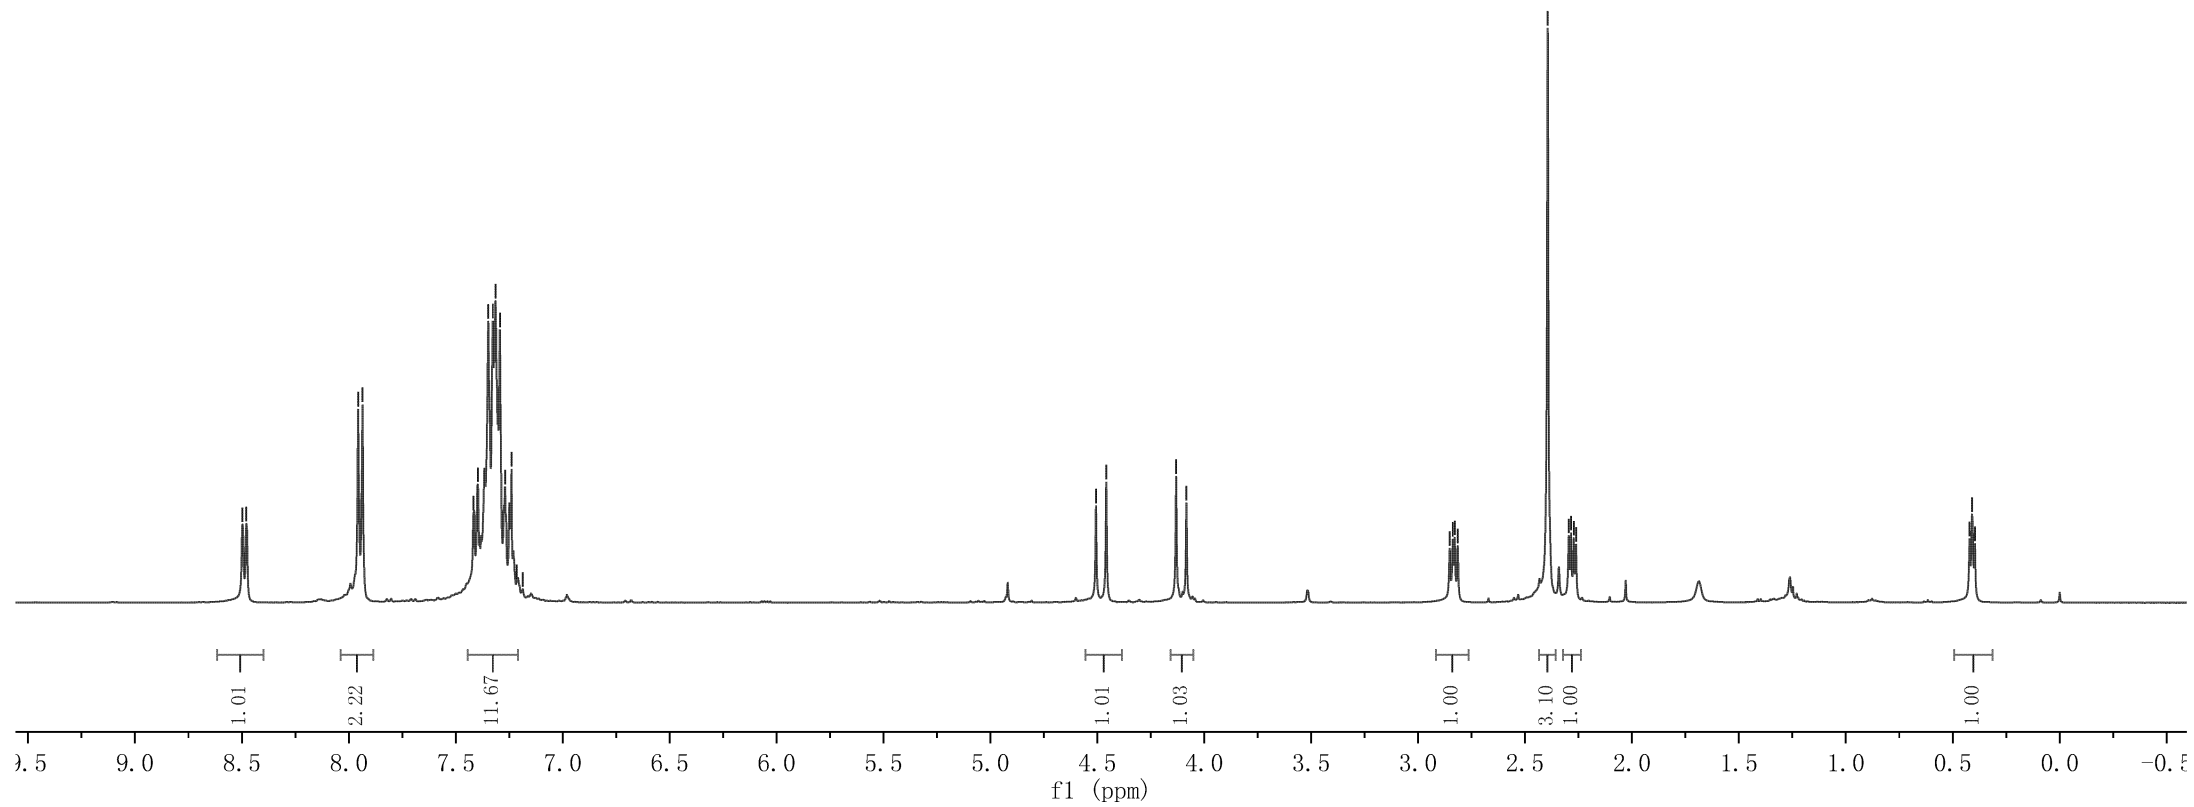

166.93  
156.50  
144.88  
139.43  
135.51  
134.87  
129.63  
129.54  
128.99  
128.51  
128.14  
127.98  
127.61  
126.44  
124.37  
124.16  
121.89

77.32  
77.00  
76.68

50.68

31.81  
31.64

21.55

16.84

| Parameter                | Value               |
|--------------------------|---------------------|
| 1 Title                  | hf1-5-53-c          |
| 2 Origin                 | Bruker BioSpin GmbH |
| 3 Solvent                | CDC13               |
| 4 Temperature            | 297.7               |
| 5 Number of Scans        | 34                  |
| 6 Acquisition Time       | 1.3631              |
| 7 Acquisition Date       | 2018-06-07T21:17:04 |
| 8 Spectrometer Frequency | 100.61              |
| 9 Spectral Width         | 24038.5             |

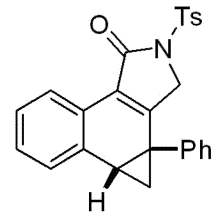

**2a**

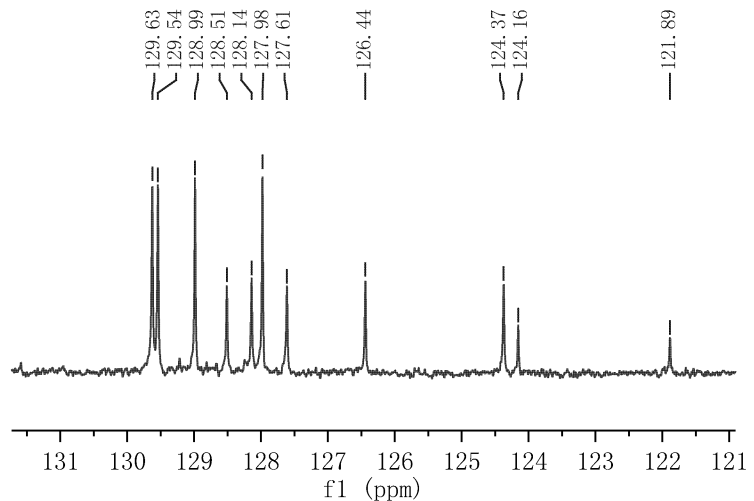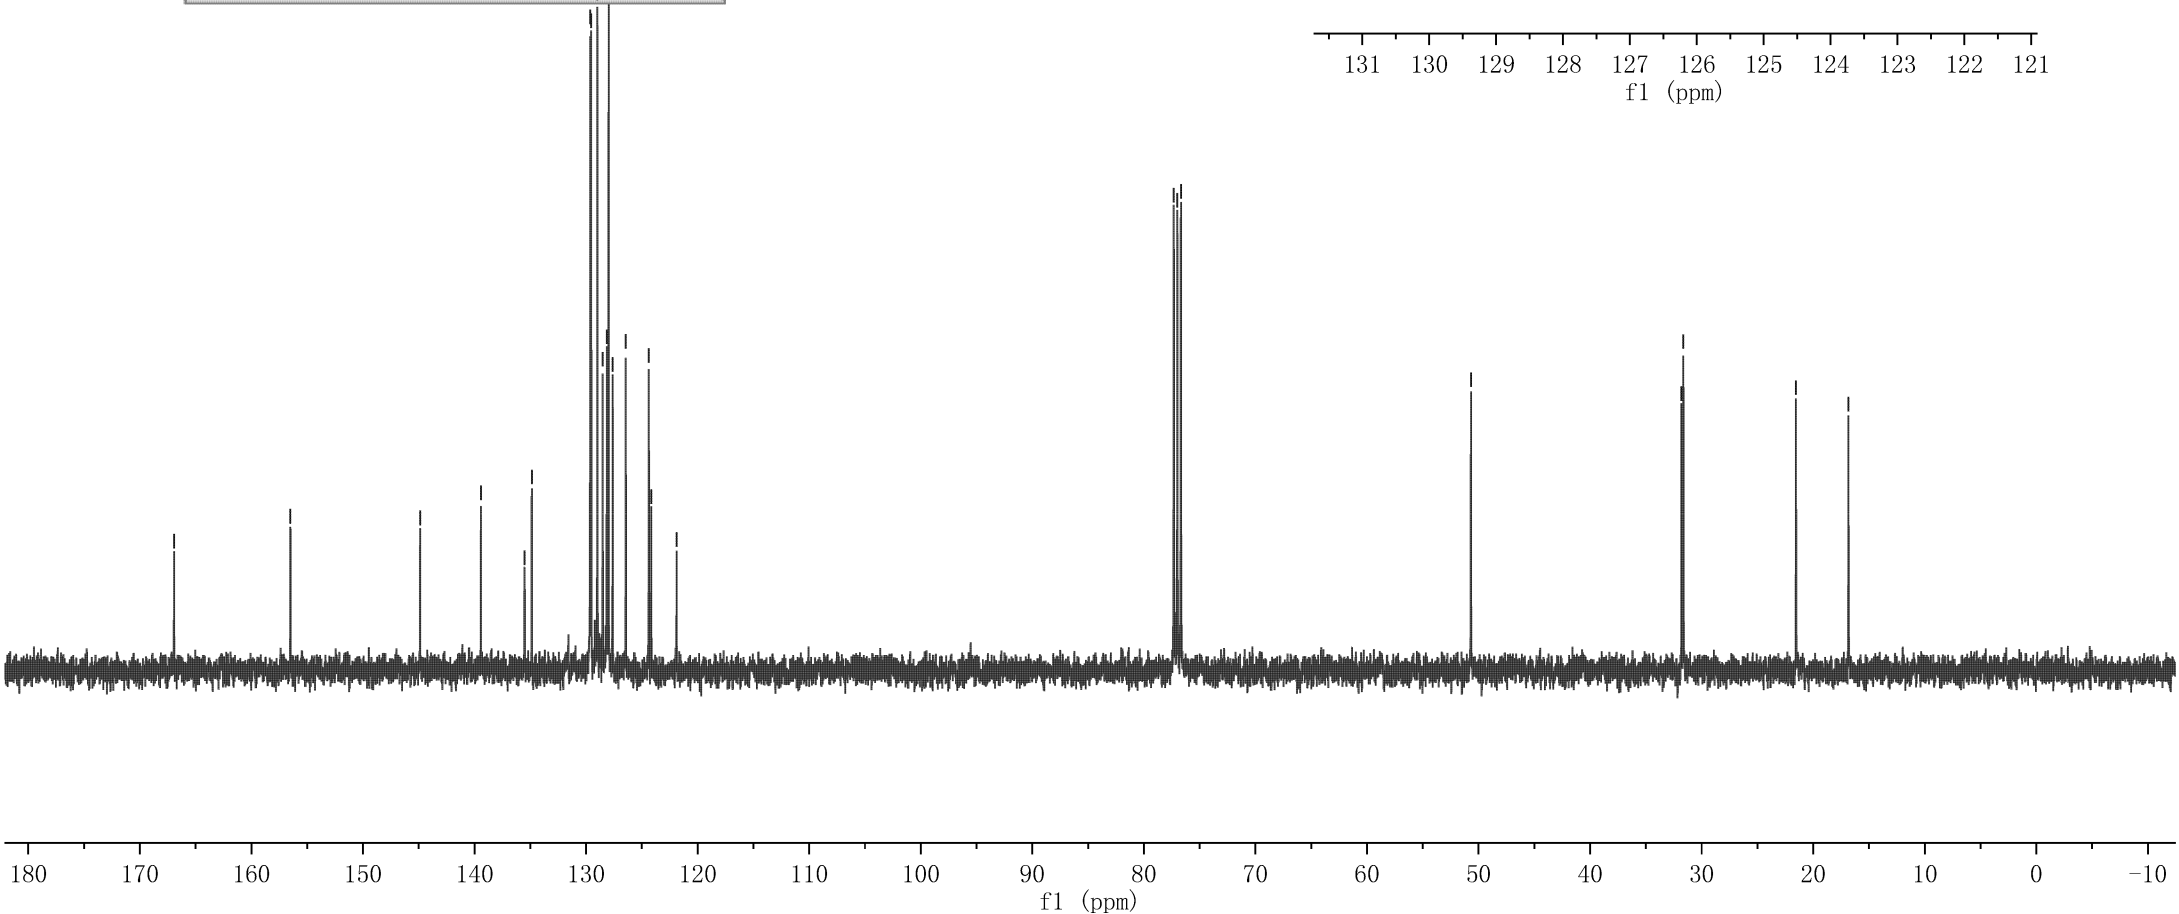

| Parameter                | Value               |
|--------------------------|---------------------|
| 1 Title                  | hf1-5-53-c-DEPT     |
| 2 Origin                 | Bruker BioSpin GmbH |
| 3 Solvent                | CDC13               |
| 4 Temperature            | 298.1               |
| 5 Number of Scans        | 8                   |
| 6 Acquisition Time       | 1.3631              |
| 7 Acquisition Date       | 2018-06-07T21:19:40 |
| 8 Spectrometer Frequency | 100.61              |
| 9 Spectral Width         | 24038.5             |

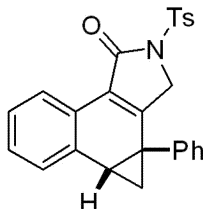

**2a**

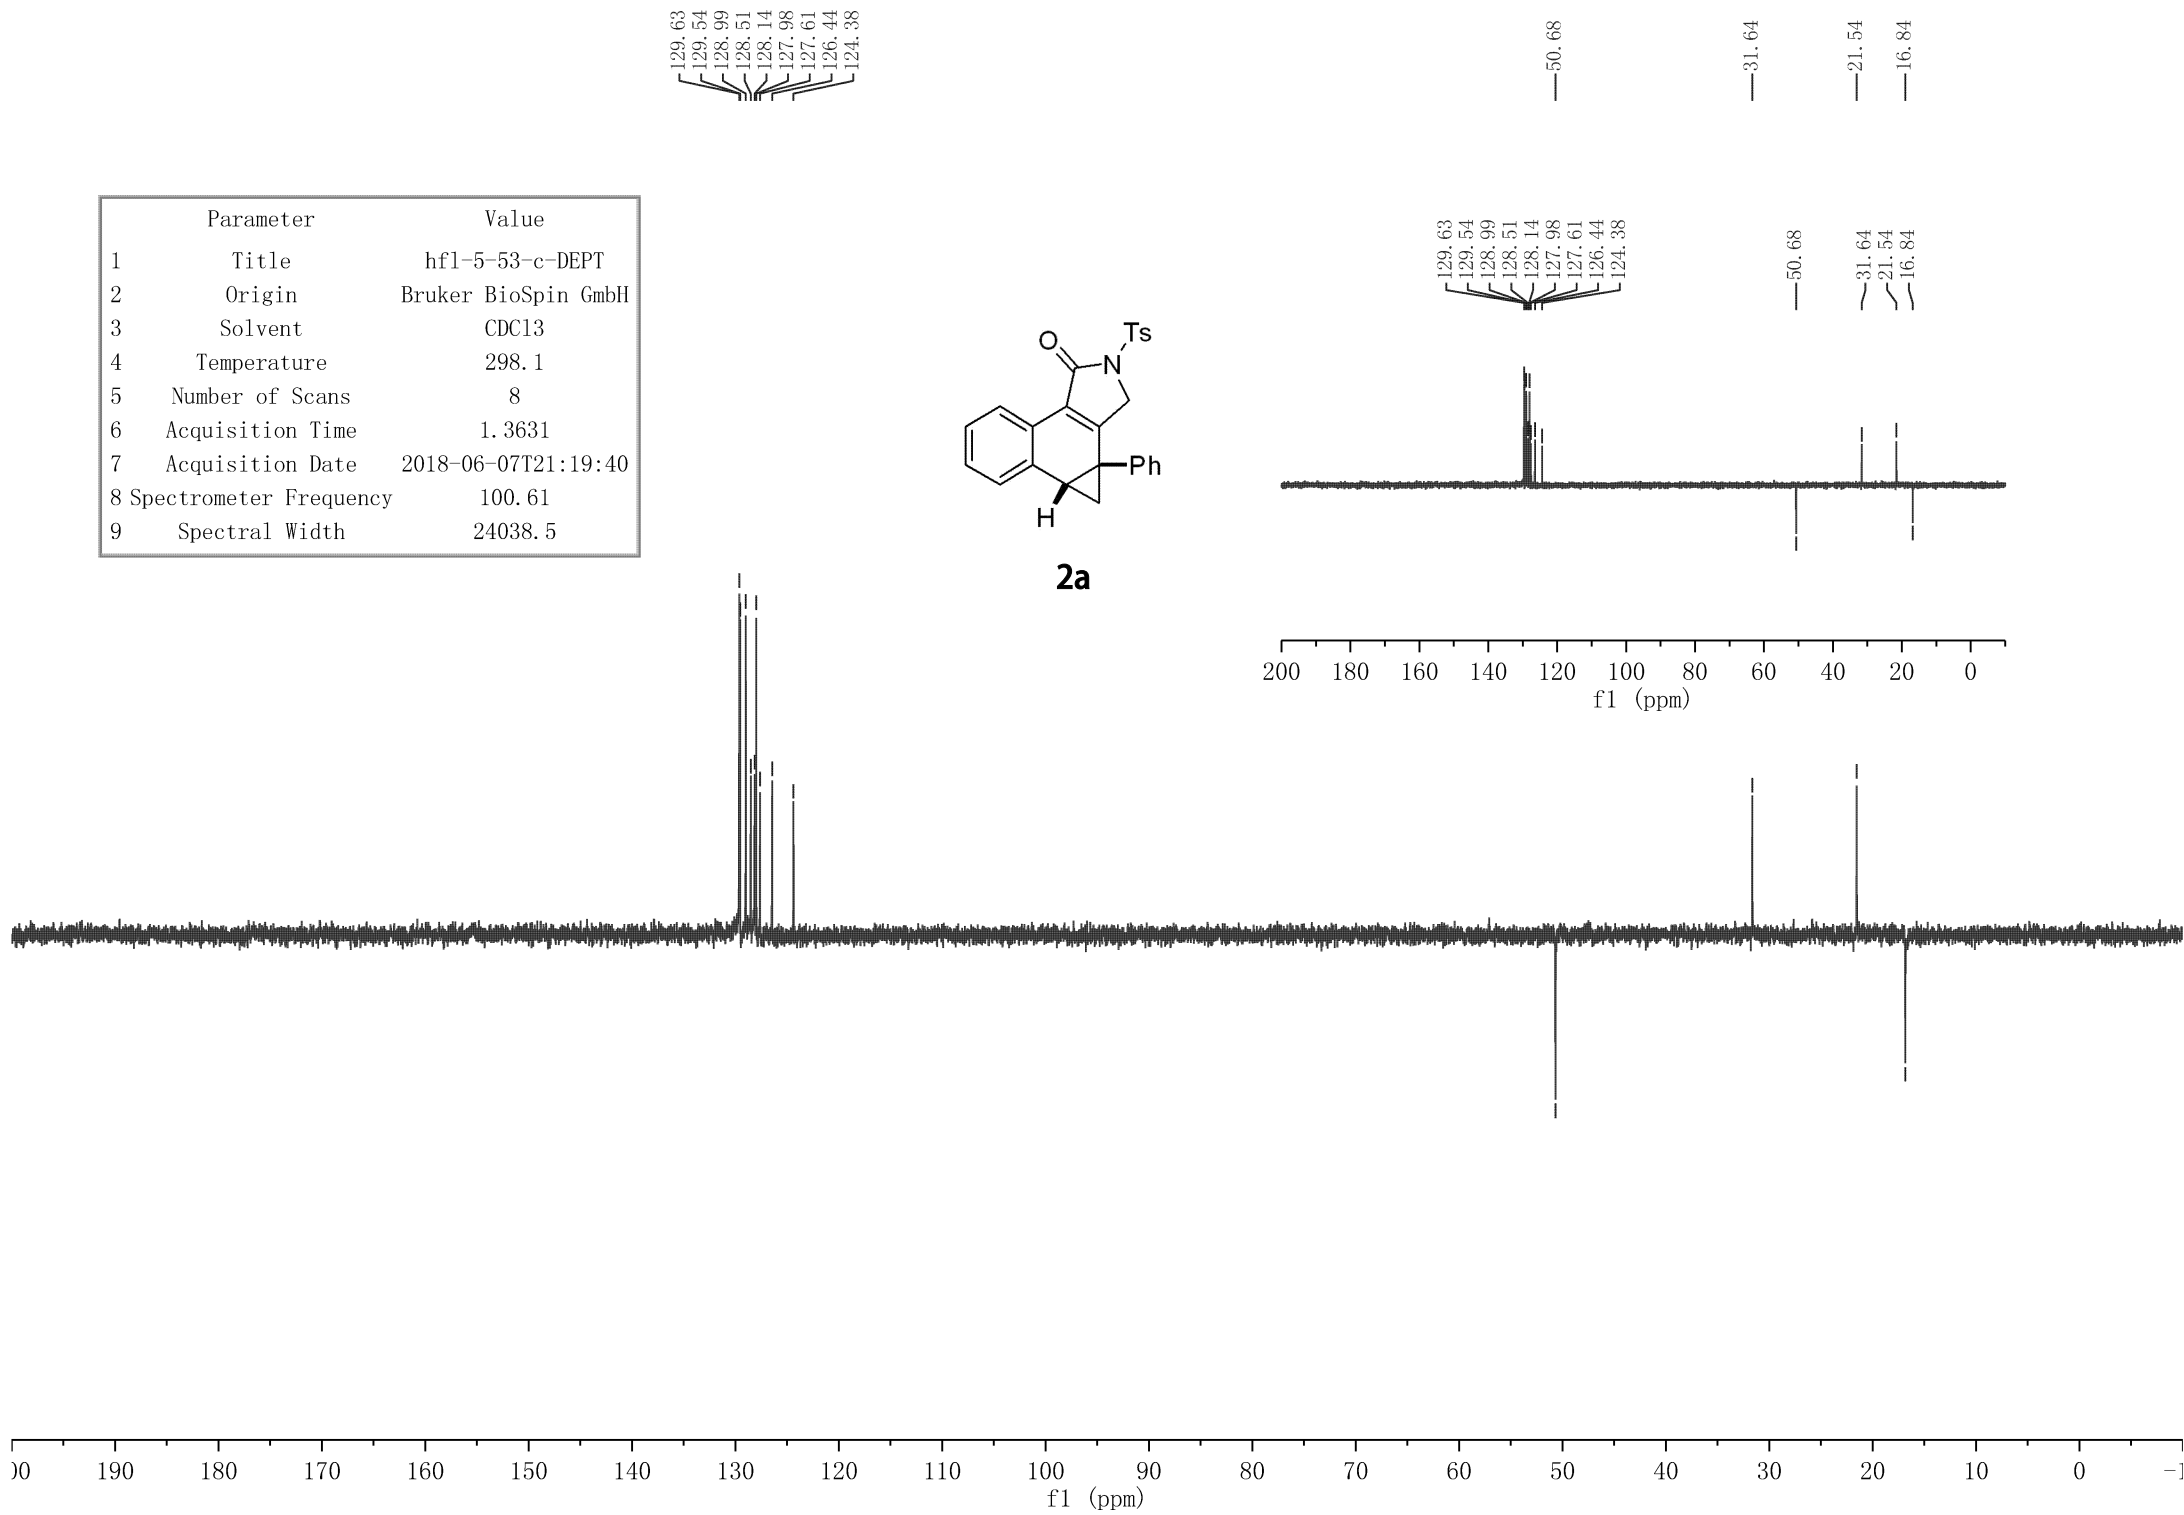

8.500  
8.482  
8.478  
8.016  
7.994  
7.425  
7.404  
7.356  
7.337  
7.304  
7.281  
7.258  
7.251  
6.985  
6.963

4.501  
4.453  
4.128  
4.080  
3.844

2.863  
2.848  
2.839  
2.825  
2.303  
2.292  
2.279  
2.269

0.442  
0.431  
0.428  
0.418

| Parameter                | Value               |
|--------------------------|---------------------|
| 1 Title                  | hf1-5-136-7.5-h     |
| 2 Origin                 | Bruker BioSpin GmbH |
| 3 Solvent                | CDC13               |
| 4 Temperature            | 299.2               |
| 5 Number of Scans        | 5                   |
| 6 Acquisition Time       | 3.9846              |
| 7 Acquisition Date       | 2018-07-05T22:12:54 |
| 8 Spectrometer Frequency | 400.13              |
| 9 Spectral Width         | 8223.7              |

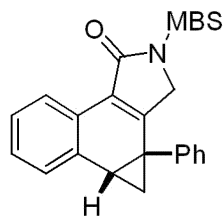

**2b**

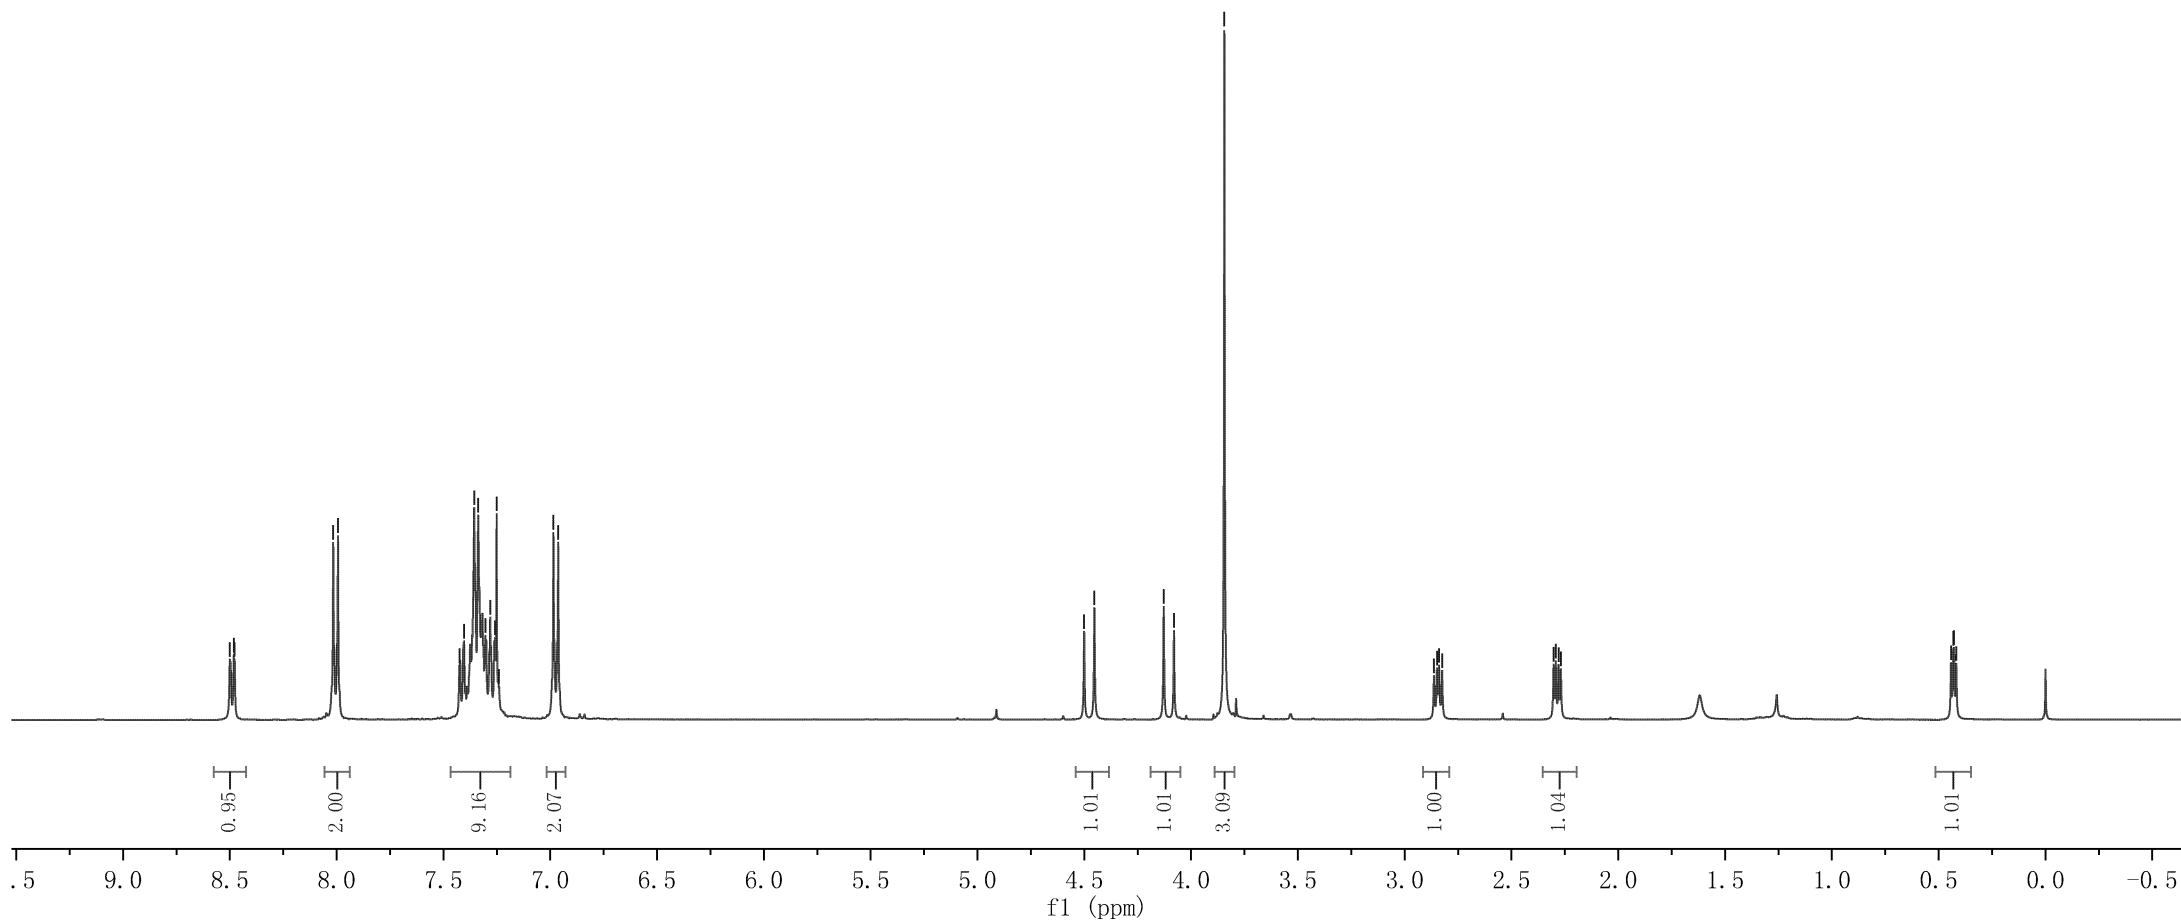

167.02  
163.88  
156.41  
139.55  
134.93  
130.35  
129.60  
129.04  
128.55  
128.19  
127.65  
126.51  
124.46  
124.27  
122.03

77.32  
77.00  
76.68

55.62  
50.72

31.87  
31.69

16.87

| Parameter                | Value               |
|--------------------------|---------------------|
| 1 Title                  | hf1-5-136-7.5-C     |
| 2 Origin                 | Bruker BioSpin GmbH |
| 3 Solvent                | CDC13               |
| 4 Temperature            | 299.4               |
| 5 Number of Scans        | 118                 |
| 6 Acquisition Time       | 1.3631              |
| 7 Acquisition Date       | 2018-07-05T22:15:12 |
| 8 Spectrometer Frequency | 100.61              |
| 9 Spectral Width         | 24038.5             |

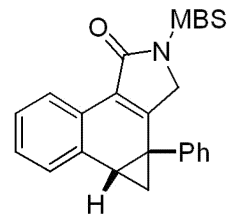

2b

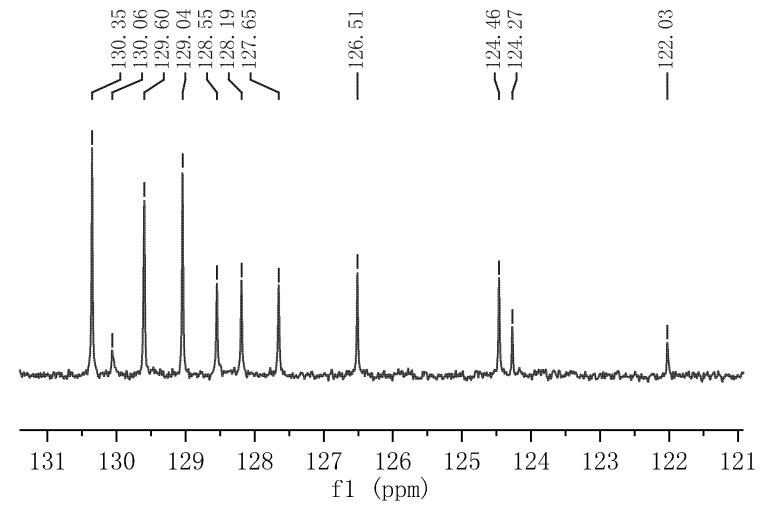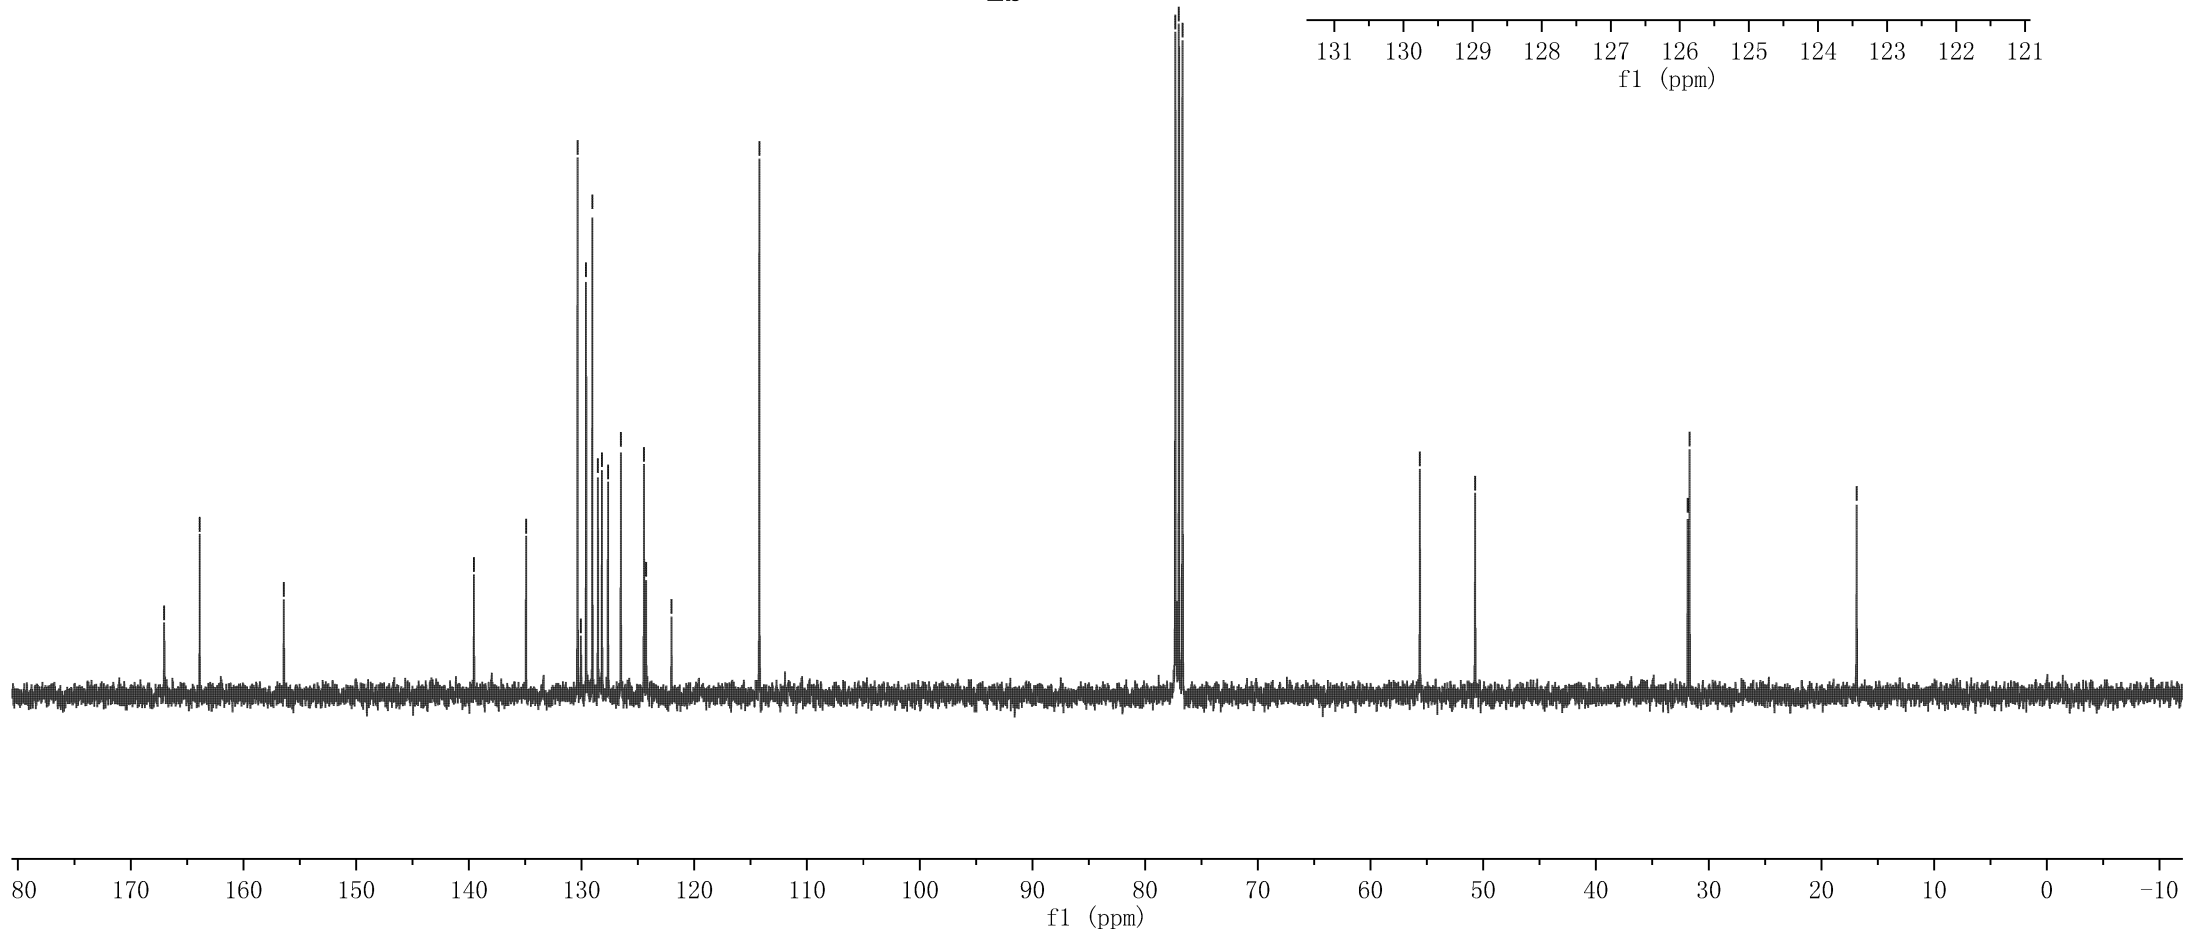

8.498  
8.495  
8.479  
8.475  
8.086  
8.068  
8.064  
7.637  
7.618  
7.600  
7.547  
7.527  
7.509  
7.410  
7.380  
7.361  
7.339  
7.288  
7.251  
7.220

4.520  
4.473

4.143  
4.095

2.871  
2.857  
2.848  
2.833

2.311  
2.301  
2.288  
2.277

0.451  
0.440  
0.436  
0.426

| Parameter                | Value               |
|--------------------------|---------------------|
| 1 Title                  | hf1-5-127-7.5-h     |
| 2 Origin                 | Bruker BioSpin GmbH |
| 3 Solvent                | CDC13               |
| 4 Temperature            | 299.3               |
| 5 Number of Scans        | 6                   |
| 6 Acquisition Time       | 3.9846              |
| 7 Acquisition Date       | 2018-07-05T22:10:00 |
| 8 Spectrometer Frequency | 400.13              |
| 9 Spectral Width         | 8223.7              |

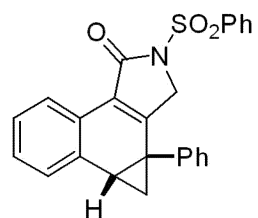

**2c**

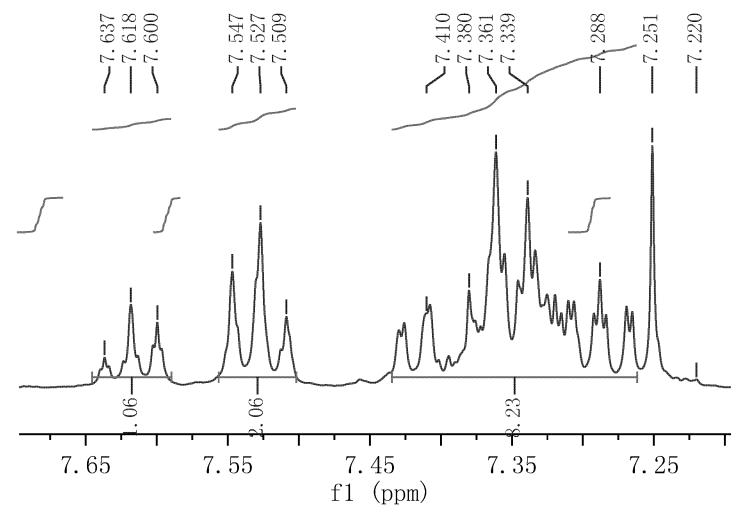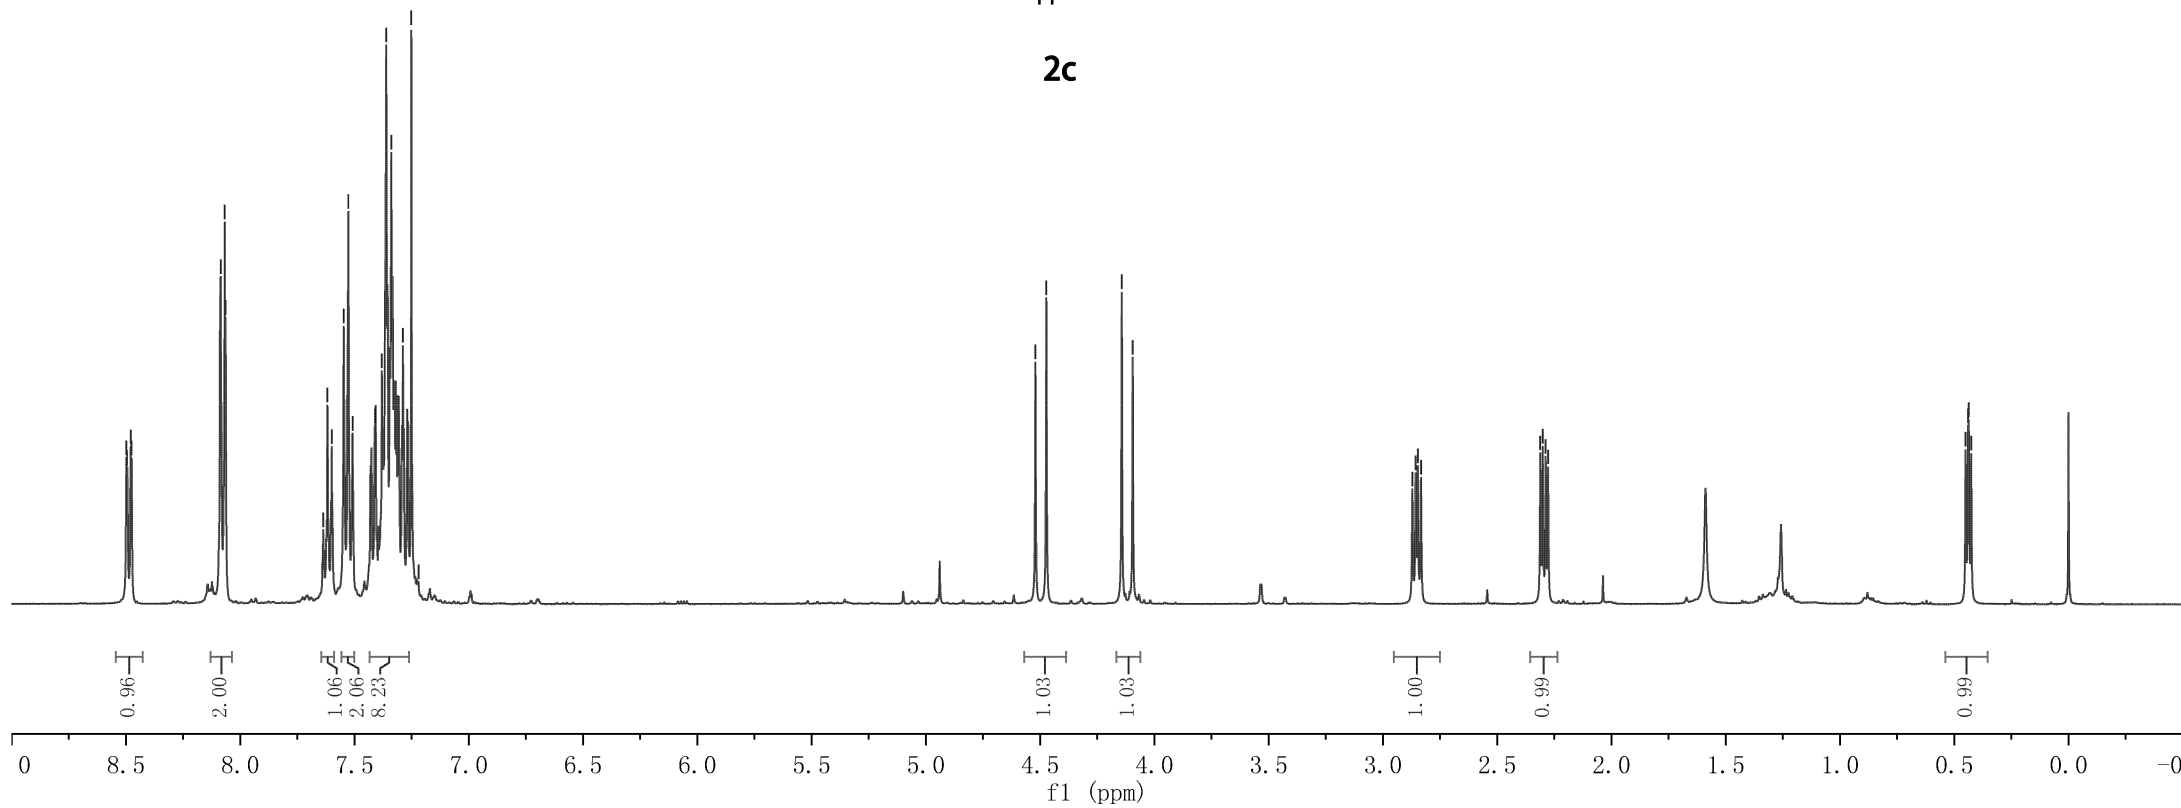

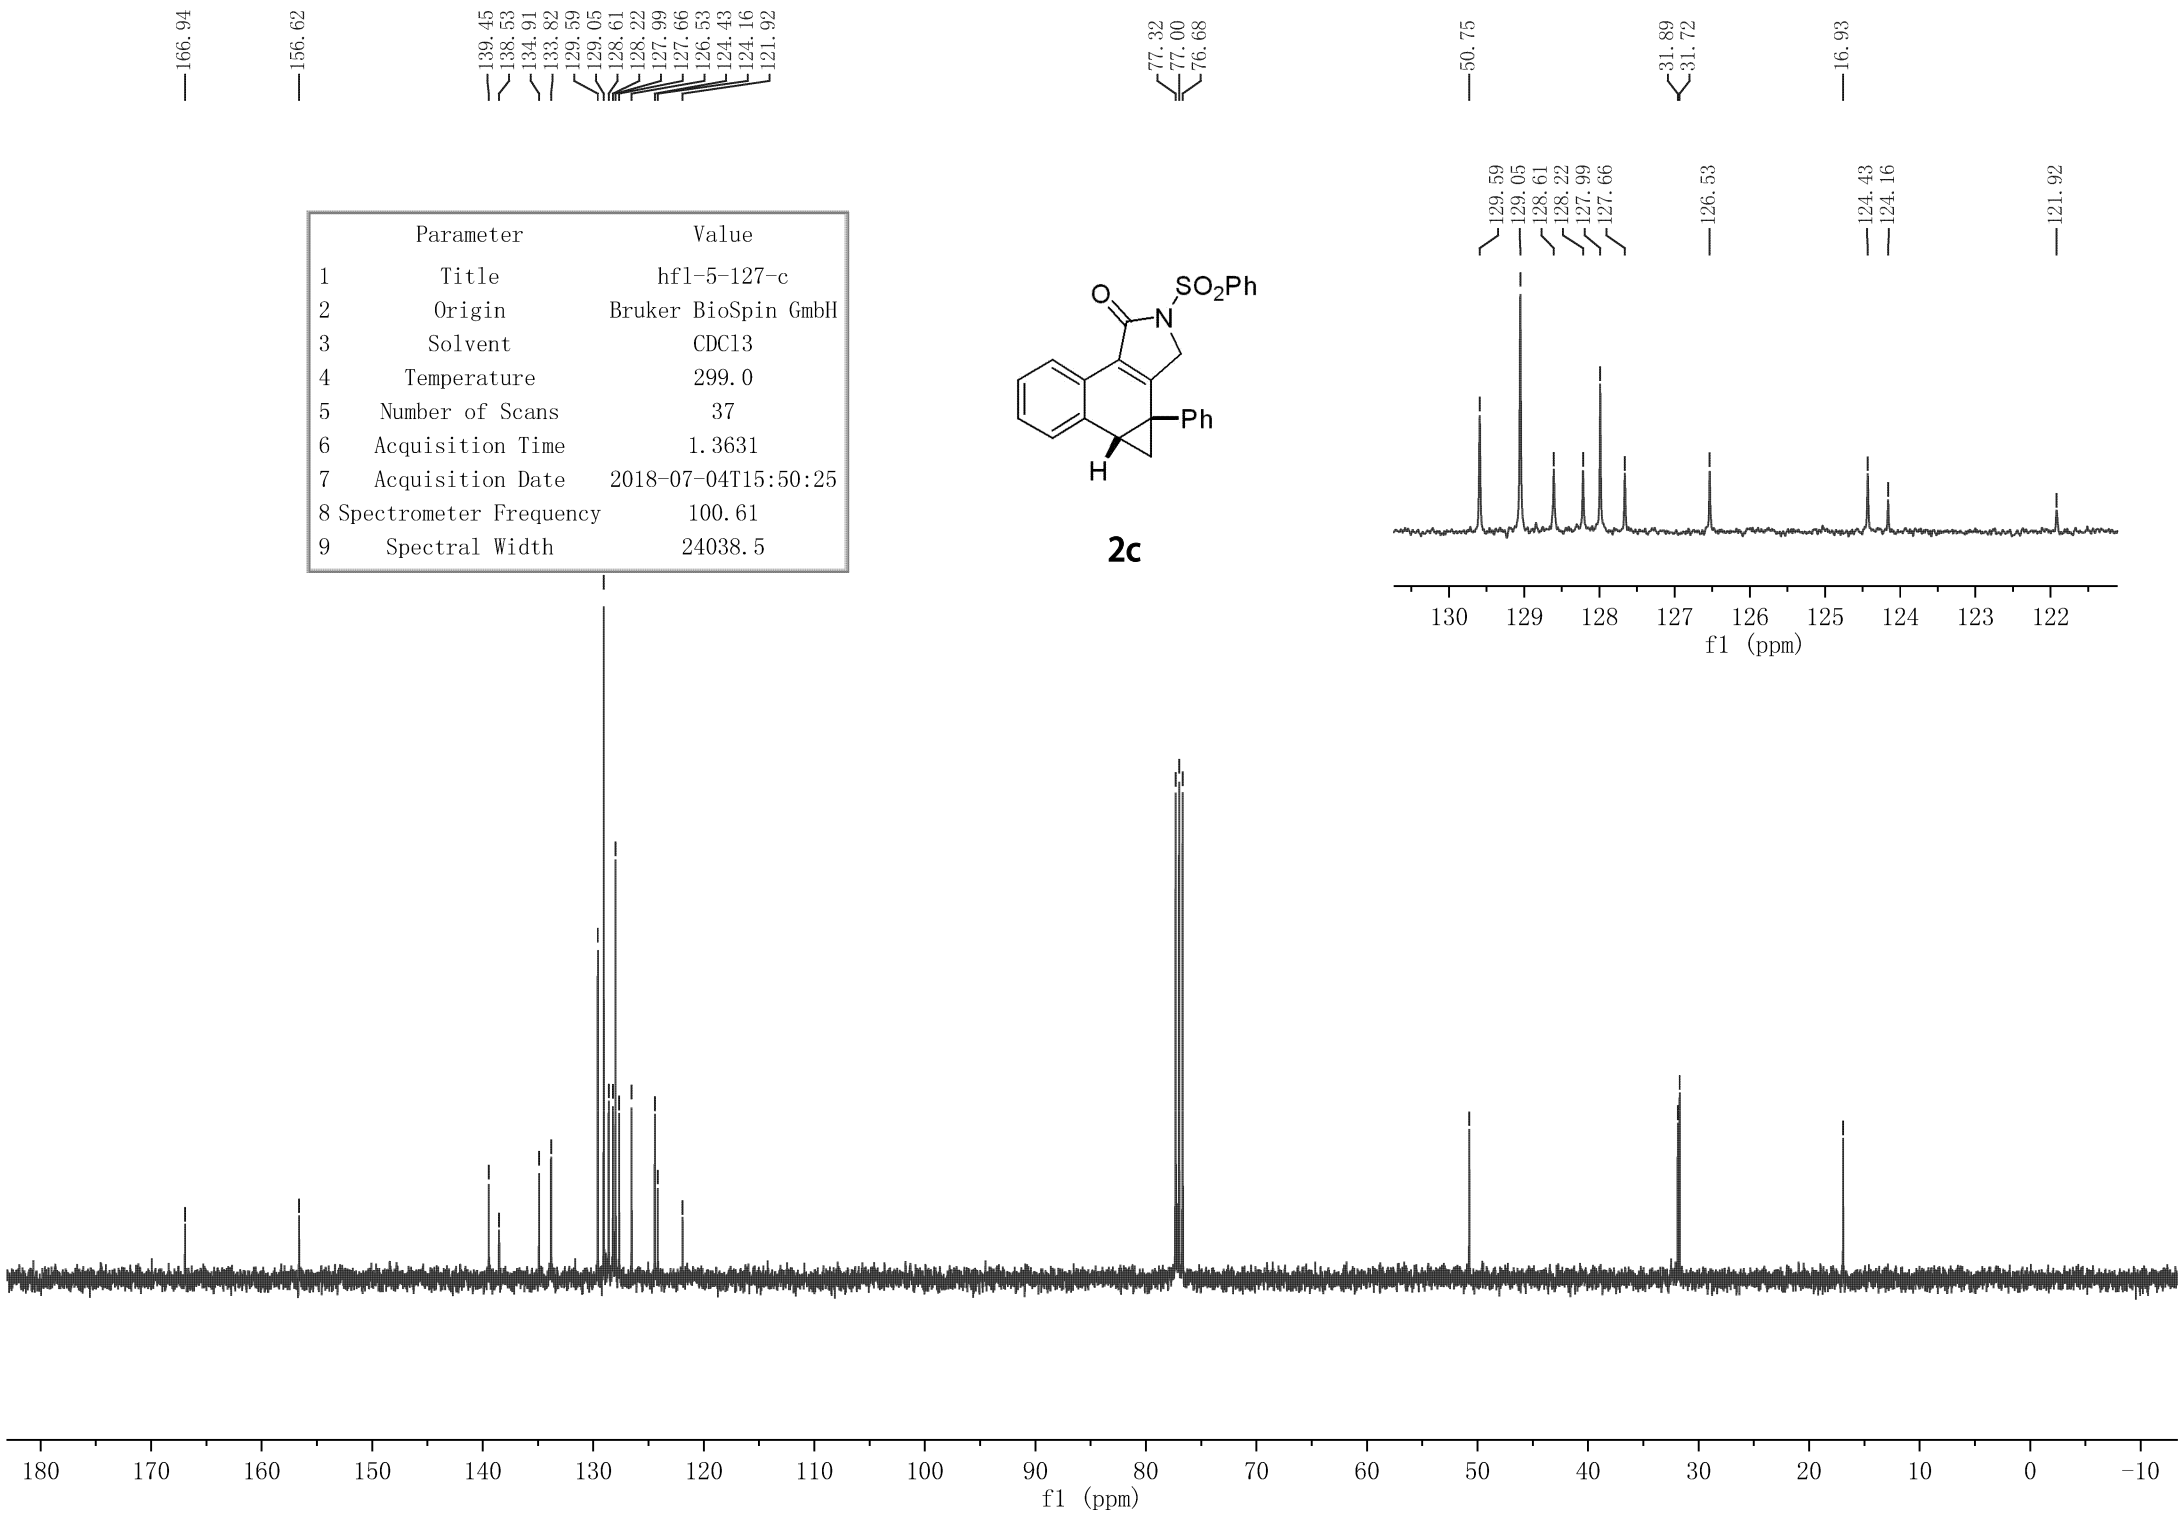

8.554  
8.550  
8.537  
8.531

7.480  
7.475  
7.464  
7.461  
7.458  
7.388  
7.368  
7.356  
7.349  
7.338  
7.331  
7.326  
7.308

4.488  
4.439  
4.103  
4.055

3.336

2.920  
2.906  
2.897  
2.882

2.355  
2.344  
2.332  
2.321

0.506  
0.496  
0.492  
0.481

| Parameter                | Value               |
|--------------------------|---------------------|
| 1 Title                  | HFL-5-198-H-7.20    |
| 2 Origin                 | Bruker BioSpin GmbH |
| 3 Solvent                | CDC13               |
| 4 Temperature            | 299.6               |
| 5 Number of Scans        | 6                   |
| 6 Acquisition Time       | 3.9846              |
| 7 Acquisition Date       | 2018-07-20T22:07:18 |
| 8 Spectrometer Frequency | 400.13              |
| 9 Spectral Width         | 8223.7              |

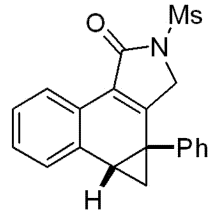

2d

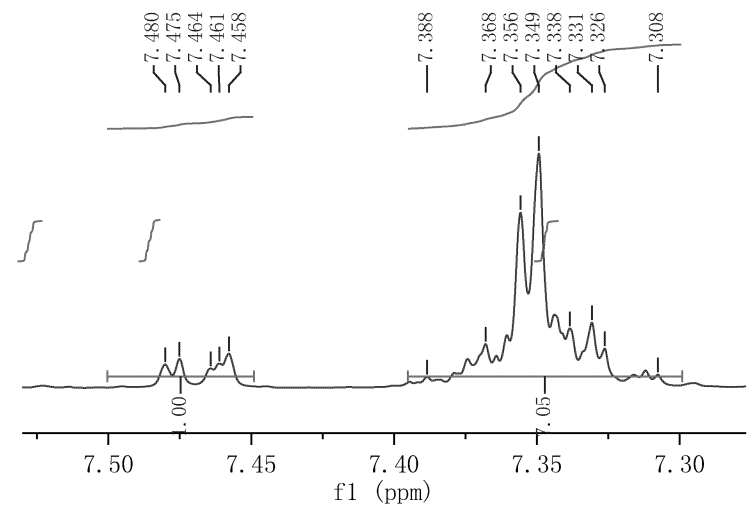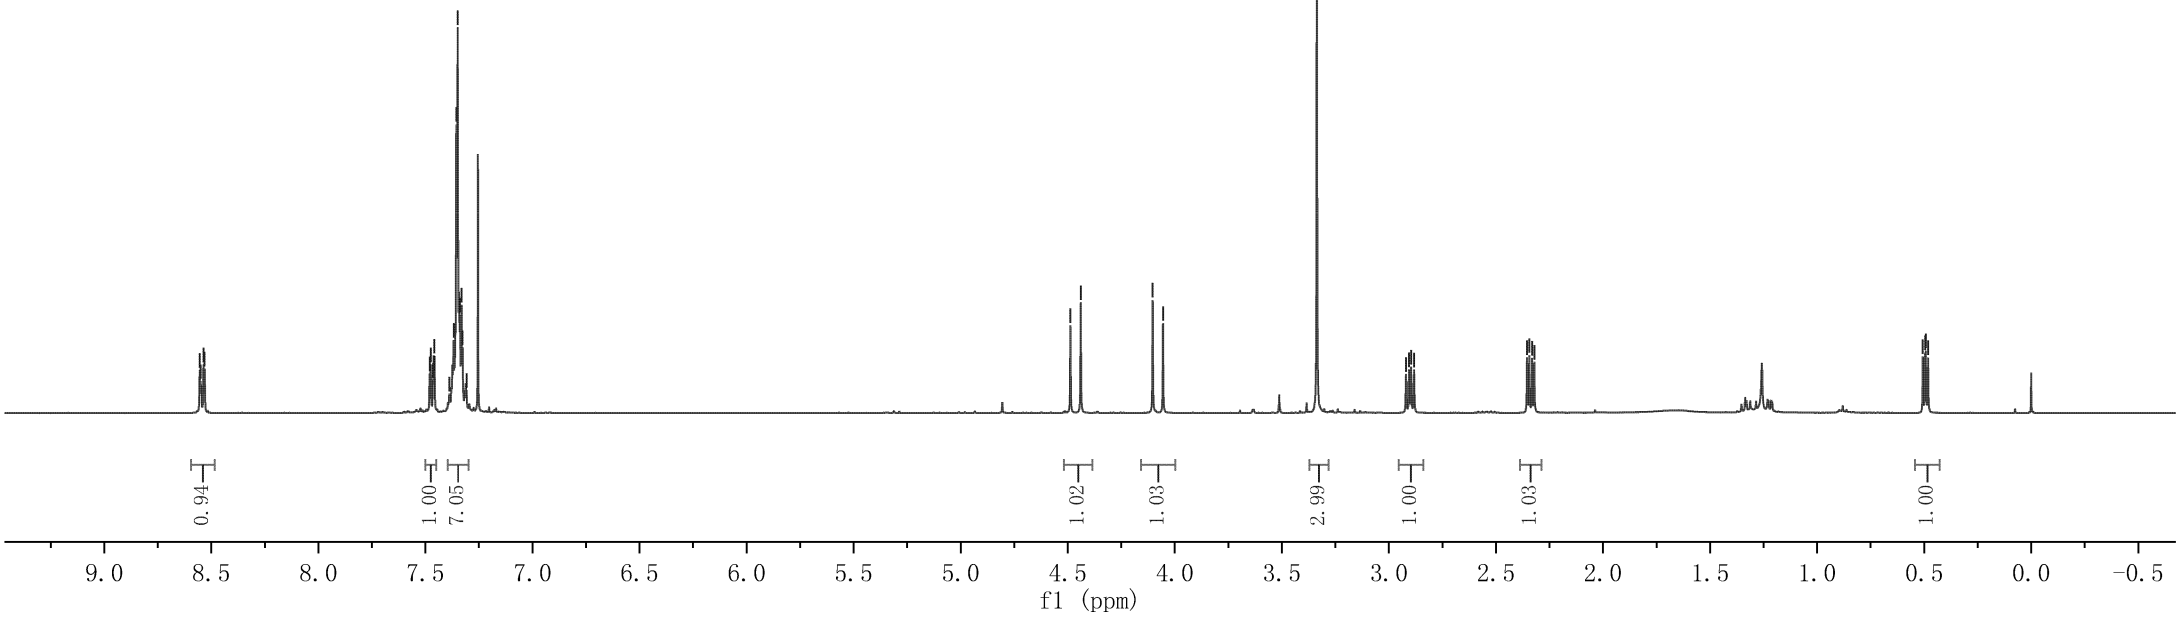



— 168.09  
— 157.12  
— 139.41  
— 134.99  
— 129.59  
— 129.08  
— 128.74  
— 128.28  
— 127.78  
— 126.67  
— 124.38  
— 124.15  
— 121.90

77.32  
77.00  
76.68

— 50.13

— 41.03

31.97  
31.78

— 16.95

| Parameter                | Value               |
|--------------------------|---------------------|
| 1 Title                  | HFL-5-198-C-7.20    |
| 2 Origin                 | Bruker BioSpin GmbH |
| 3 Solvent                | CDC13               |
| 4 Temperature            | 299.6               |
| 5 Number of Scans        | 32                  |
| 6 Acquisition Time       | 1.3631              |
| 7 Acquisition Date       | 2018-07-20T22:09:37 |
| 8 Spectrometer Frequency | 100.61              |
| 9 Spectral Width         | 24038.5             |

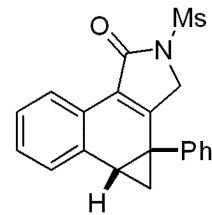

**2d**

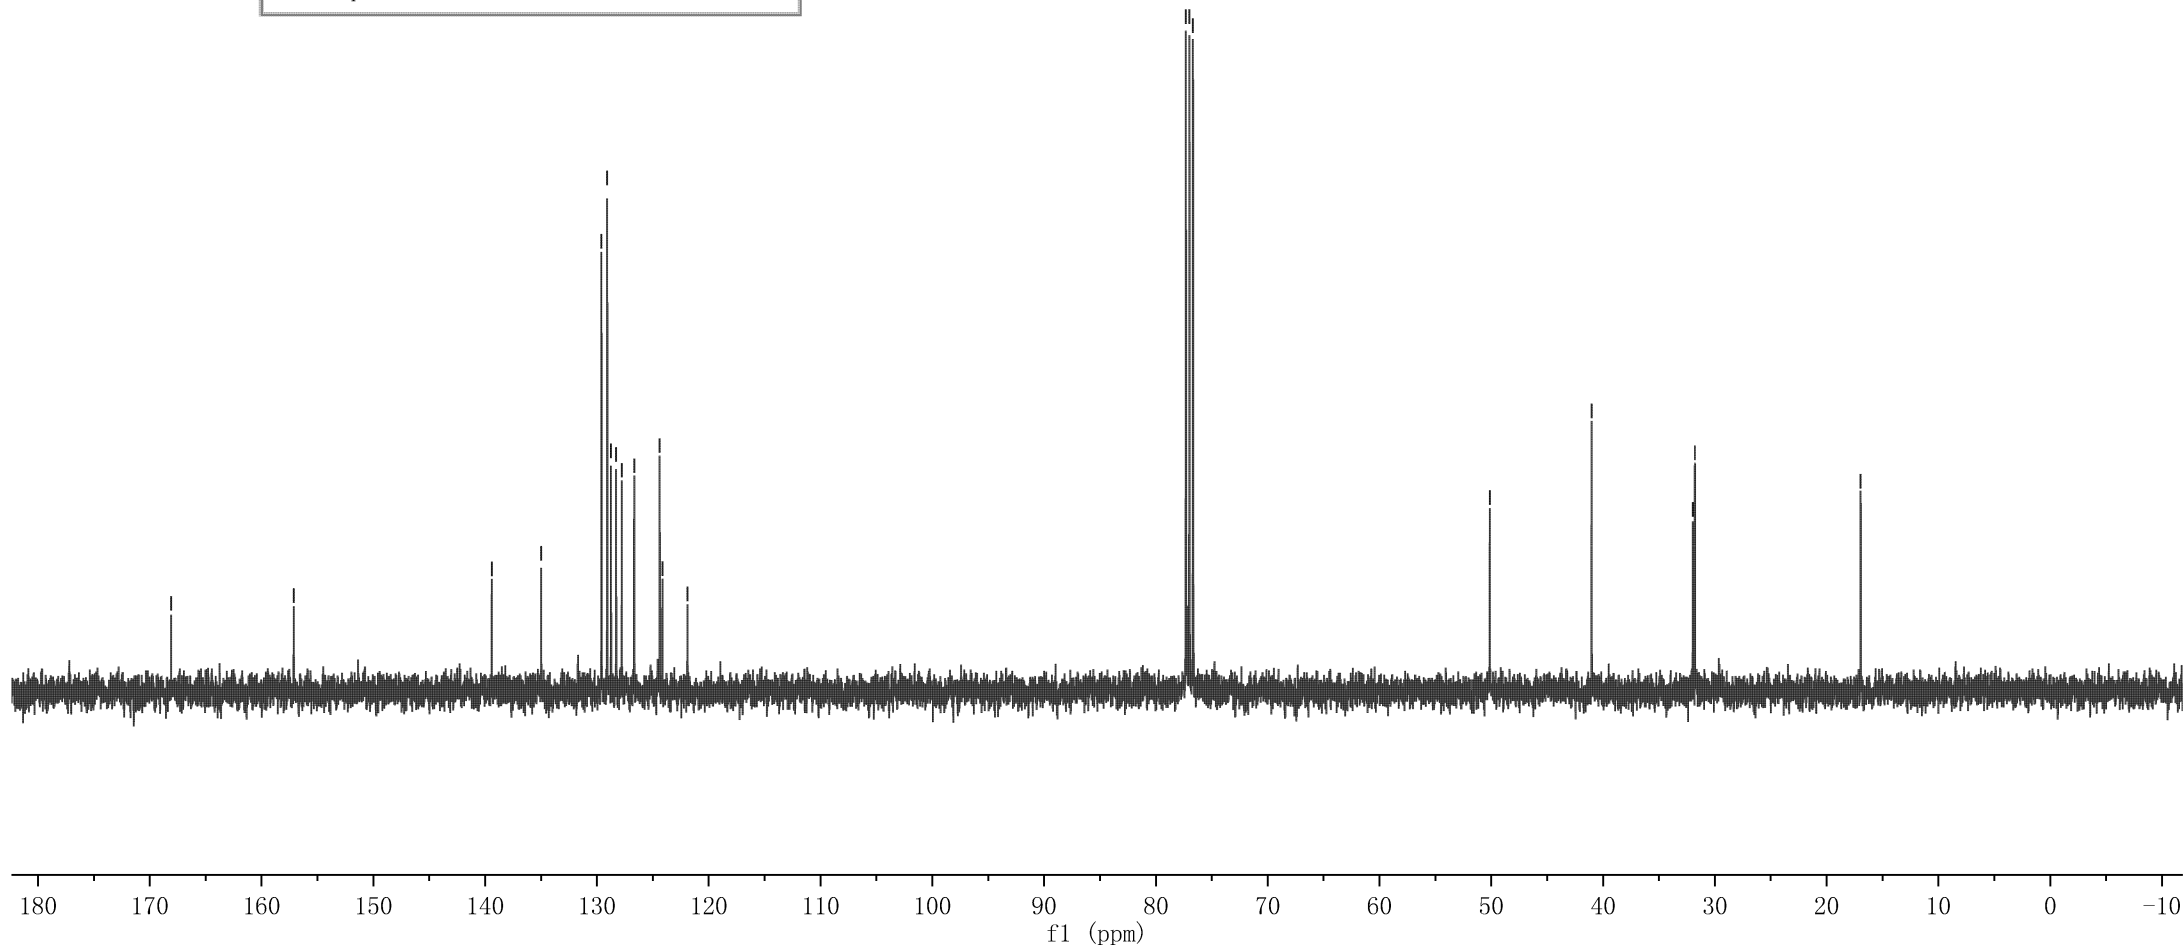

8.490  
8.472  
8.468  
7.957  
7.936  
7.410  
7.392  
7.316  
7.296  
7.241  
7.214  
7.193  
7.175  
7.154

4.493  
4.445  
4.137  
4.089

2.823  
2.809  
2.800  
2.785  
2.398  
2.366  
2.274  
2.263  
2.250  
2.240

0.397  
0.386  
0.383  
0.373

| Parameter                | Value               |
|--------------------------|---------------------|
| 1 Title                  | hf1-5-154-h         |
| 2 Origin                 | Bruker BioSpin GmbH |
| 3 Solvent                | CDC13               |
| 4 Temperature            | 299.0               |
| 5 Number of Scans        | 8                   |
| 6 Acquisition Time       | 3.9846              |
| 7 Acquisition Date       | 2018-07-08T17:18:51 |
| 8 Spectrometer Frequency | 400.13              |
| 9 Spectral Width         | 8223.7              |

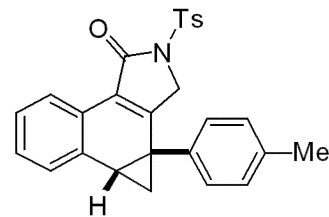

2e

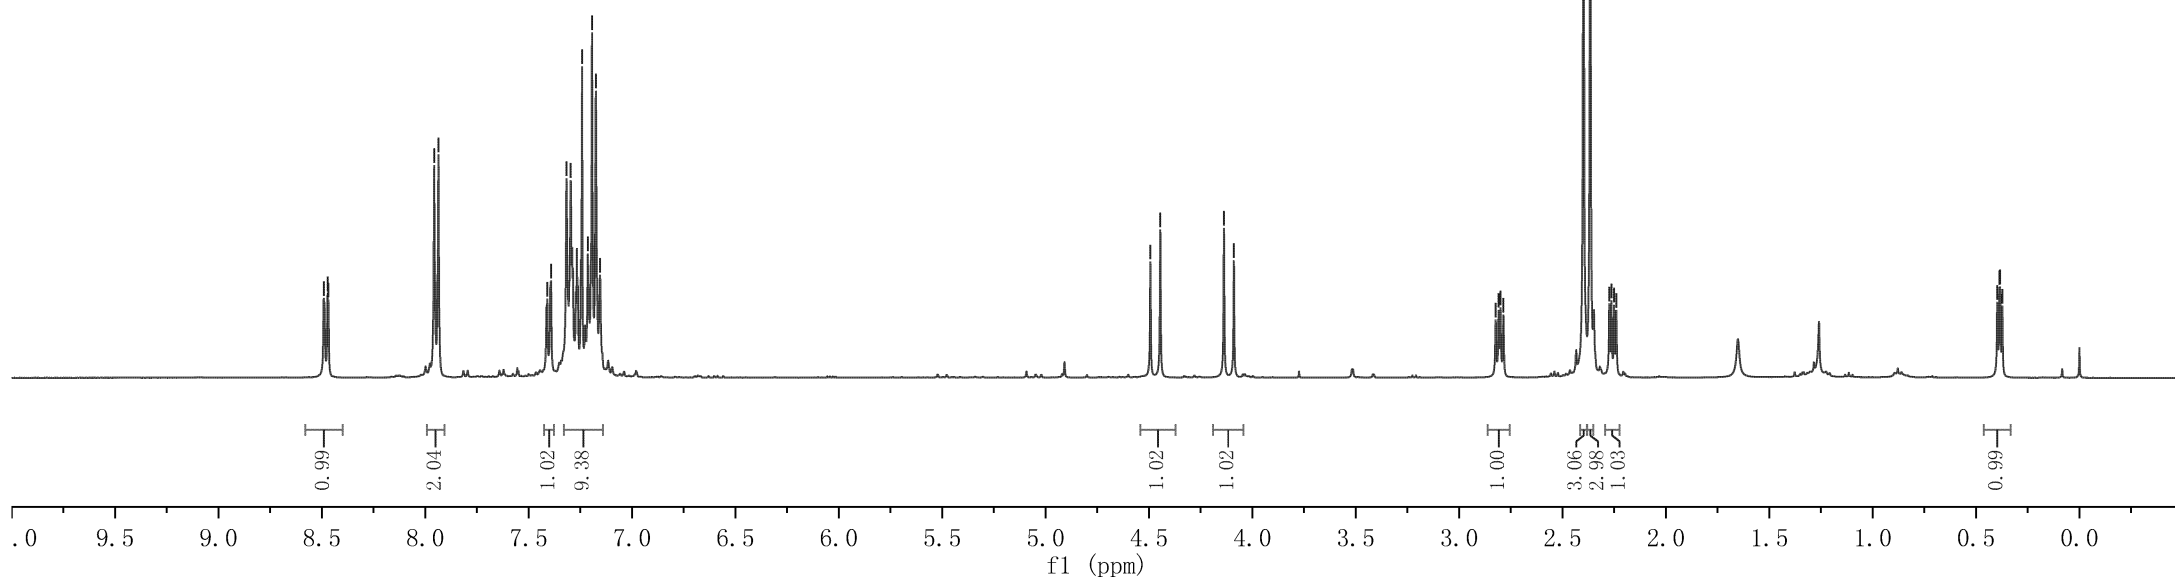

| Parameter                | Value               |
|--------------------------|---------------------|
| 1 Title                  | hf1-5-154-c         |
| 2 Origin                 | Bruker BioSpin GmbH |
| 3 Solvent                | CDC13               |
| 4 Temperature            | 299.1               |
| 5 Number of Scans        | 34                  |
| 6 Acquisition Time       | 1.3631              |
| 7 Acquisition Date       | 2018-07-08T17:21:10 |
| 8 Spectrometer Frequency | 100.61              |
| 9 Spectral Width         | 24038.5             |

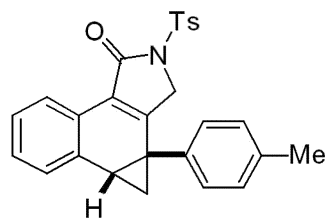

**2e**

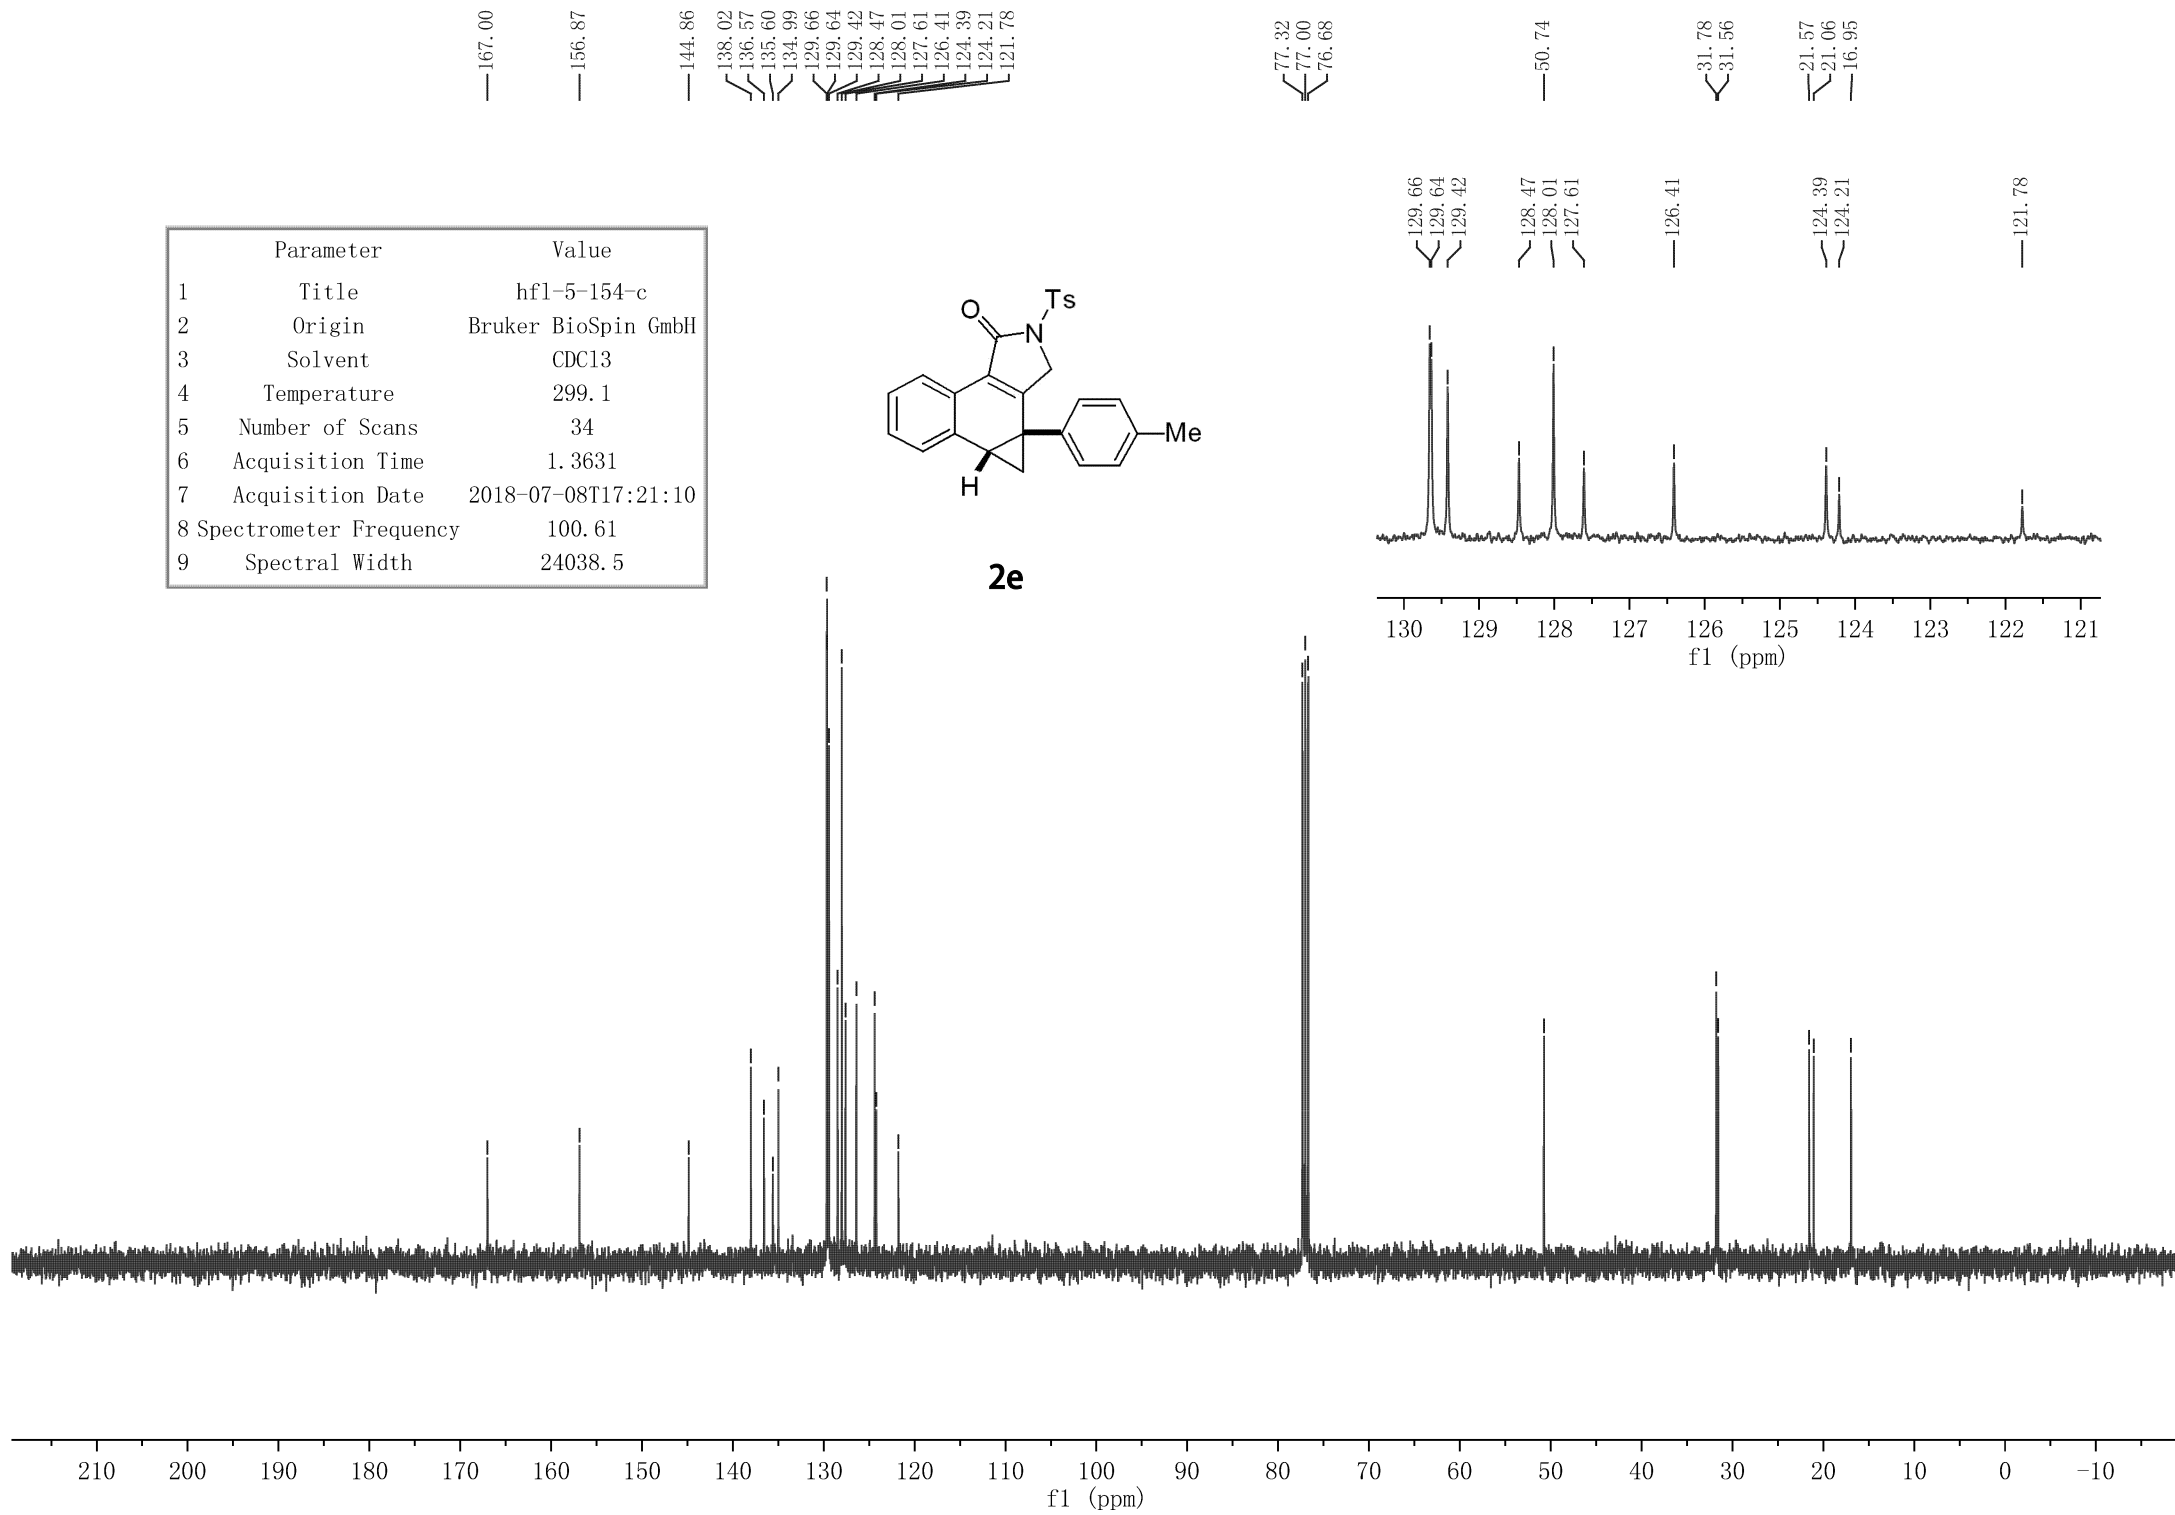

| Parameter                | Value               |
|--------------------------|---------------------|
| 1 Title                  | hfl-5-133-h. 7. 10  |
| 2 Origin                 | Bruker BioSpin GmbH |
| 3 Solvent                | CDCl3               |
| 4 Temperature            | 298.9               |
| 5 Number of Scans        | 7                   |
| 6 Acquisition Time       | 3.9846              |
| 7 Acquisition Date       | 2018-07-11T14:28:47 |
| 8 Spectrometer Frequency | 400.13              |
| 9 Spectral Width         | 8223.7              |

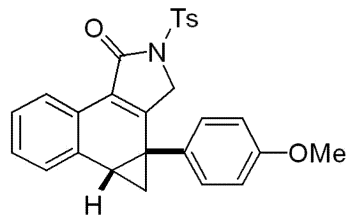

**2f**

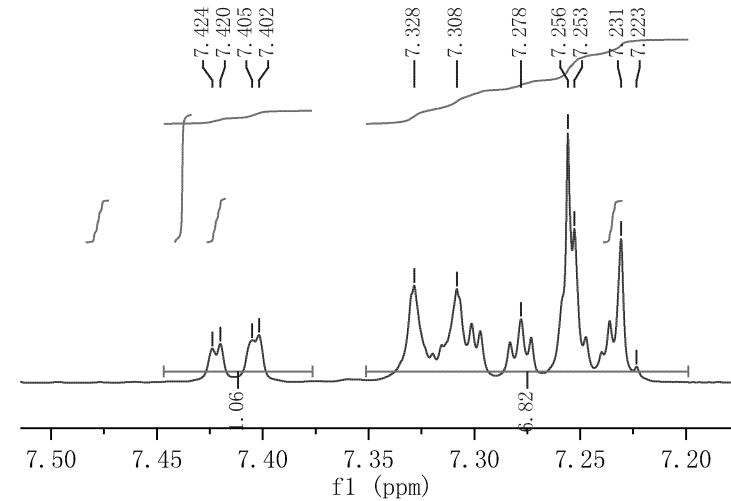

8.490  
8.486  
8.471  
8.467

7.963  
7.942

7.405  
7.402  
7.328  
7.308  
7.278  
7.256  
7.253  
7.231  
7.223  
6.878

4.492  
4.444

4.127  
4.079

3.834

2.826  
2.812  
2.803  
2.789

2.411  
2.266  
2.256  
2.243  
2.233

0.404  
0.394  
0.390  
0.380

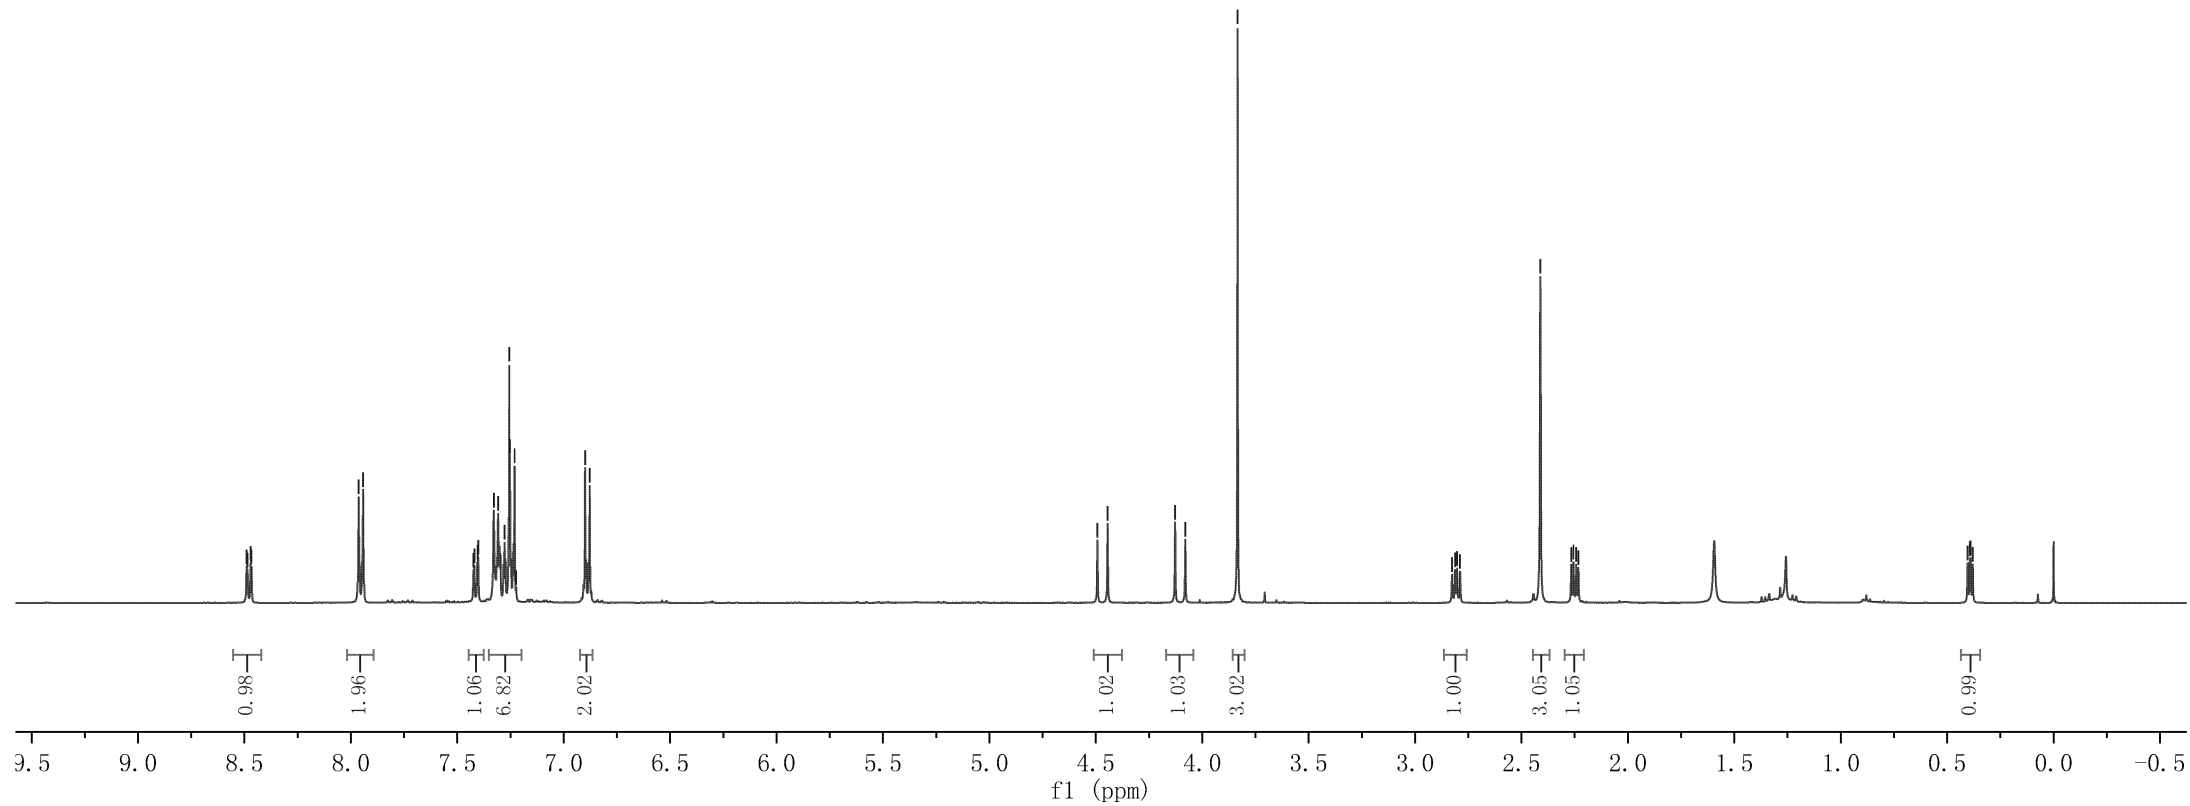

167.04  
159.46  
156.99  
144.89  
135.70  
135.06  
131.84  
130.74  
129.68  
128.51  
128.08  
127.63  
126.46  
124.47  
124.27  
121.76  
114.42

77.32  
77.00  
76.68

55.38  
50.79

31.96  
31.28

21.61  
17.19

| Parameter                | Value               |
|--------------------------|---------------------|
| 1 Title                  | hf1-5-133-c. 7.10   |
| 2 Origin                 | Bruker BioSpin GmbH |
| 3 Solvent                | CDC13               |
| 4 Temperature            | 299.3               |
| 5 Number of Scans        | 155                 |
| 6 Acquisition Time       | 1.3631              |
| 7 Acquisition Date       | 2018-07-11T14:32:06 |
| 8 Spectrometer Frequency | 100.61              |
| 9 Spectral Width         | 24038.5             |

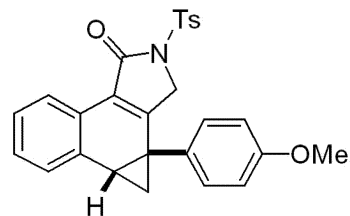

2f

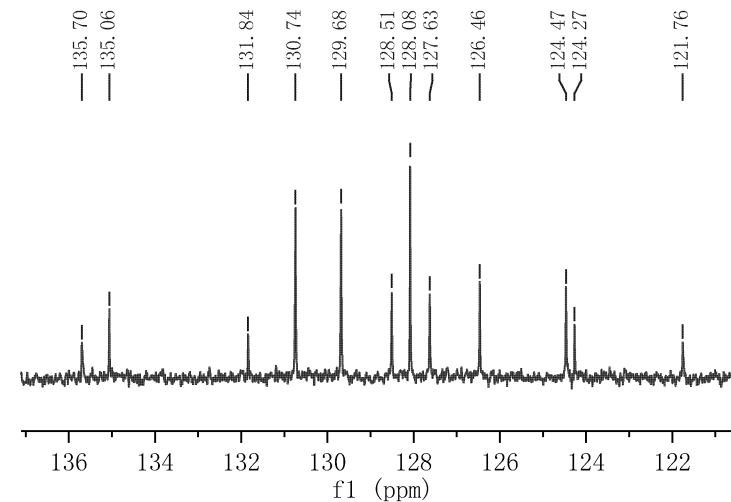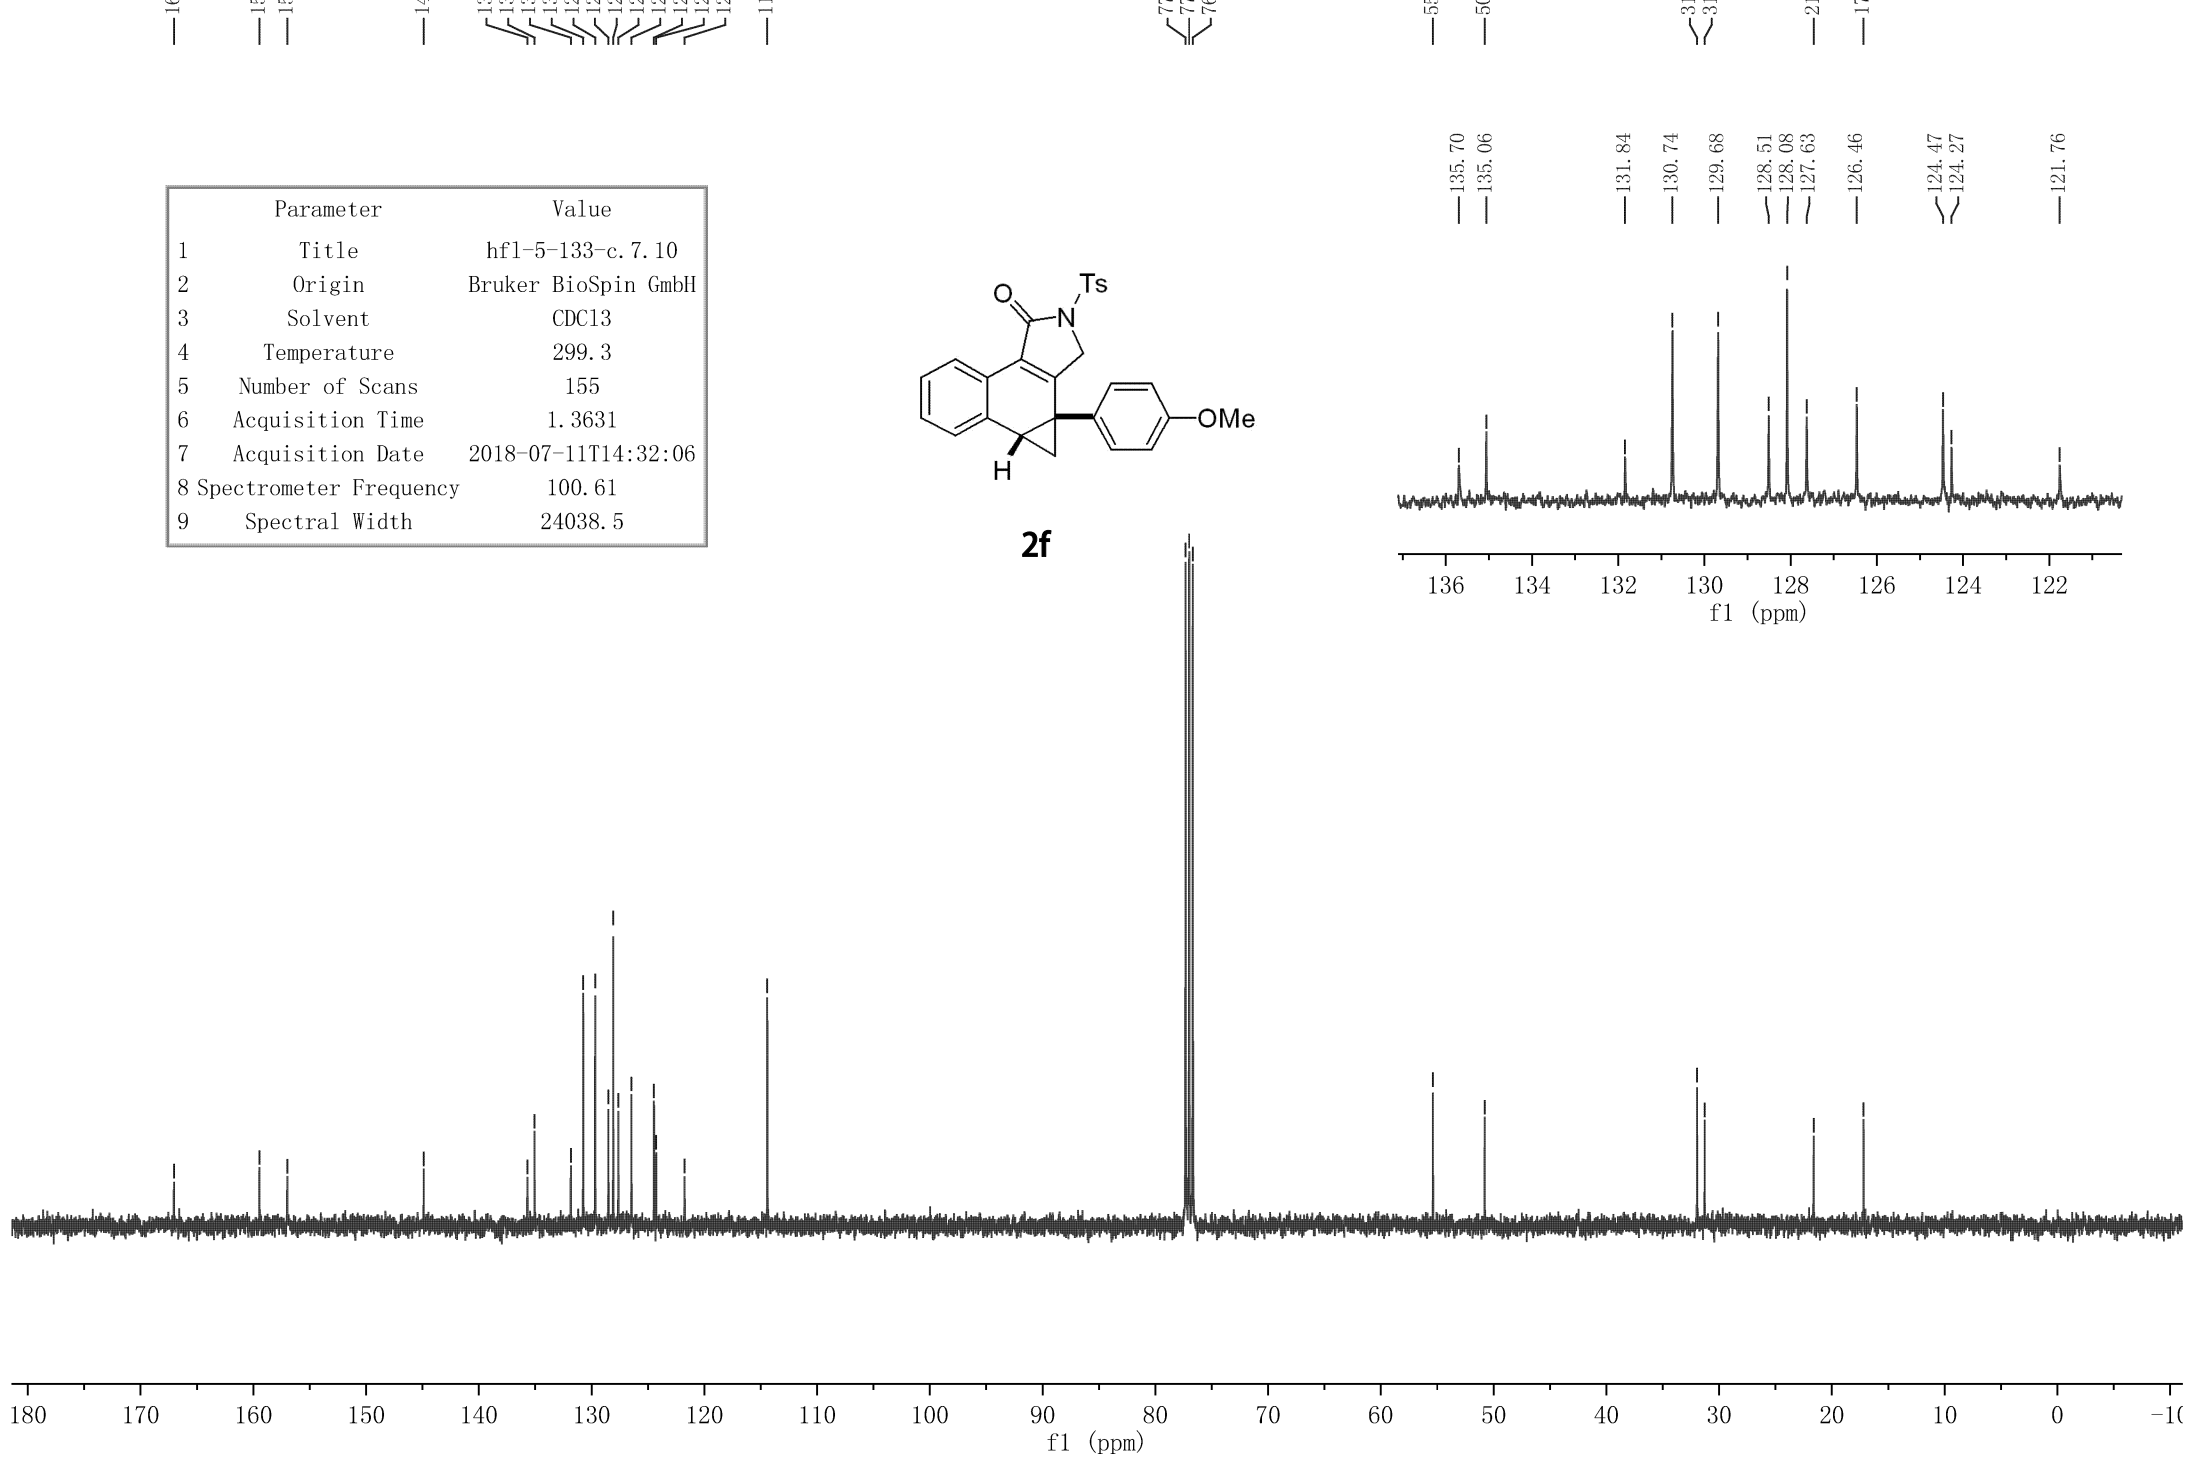

8.514  
8.496  
8.482

7.970  
7.949  
7.600  
7.593  
7.581  
7.573  
7.472  
7.454  
7.434  
7.392  
7.371  
7.316  
7.295  
7.265  
7.233

4.547  
4.499

4.209  
4.161

2.881  
2.867  
2.858  
2.844

2.394  
2.332  
2.321  
2.308  
2.298

0.455  
0.444  
0.441  
0.430

| Parameter                | Value               |
|--------------------------|---------------------|
| 1 Title                  | hf1-5-162-h         |
| 2 Origin                 | Bruker BioSpin GmbH |
| 3 Solvent                | CDC13               |
| 4 Temperature            | 299.1               |
| 5 Number of Scans        | 7                   |
| 6 Acquisition Time       | 3.9846              |
| 7 Acquisition Date       | 2018-07-12T21:44:58 |
| 8 Spectrometer Frequency | 400.13              |
| 9 Spectral Width         | 8223.7              |

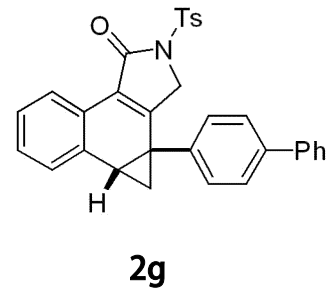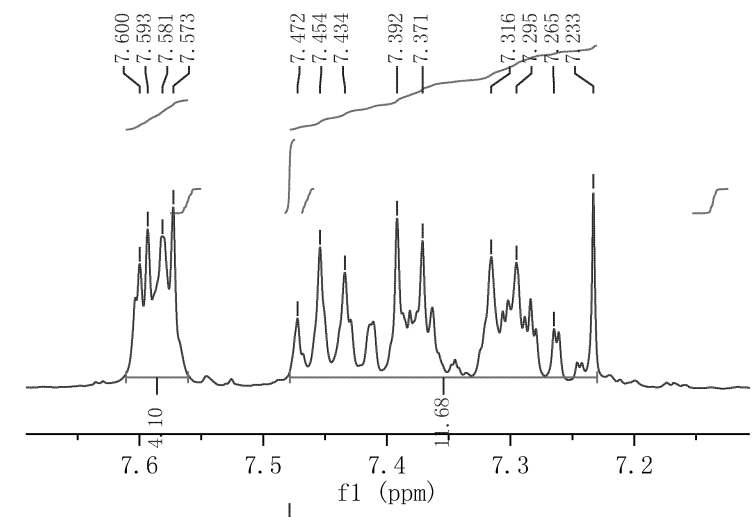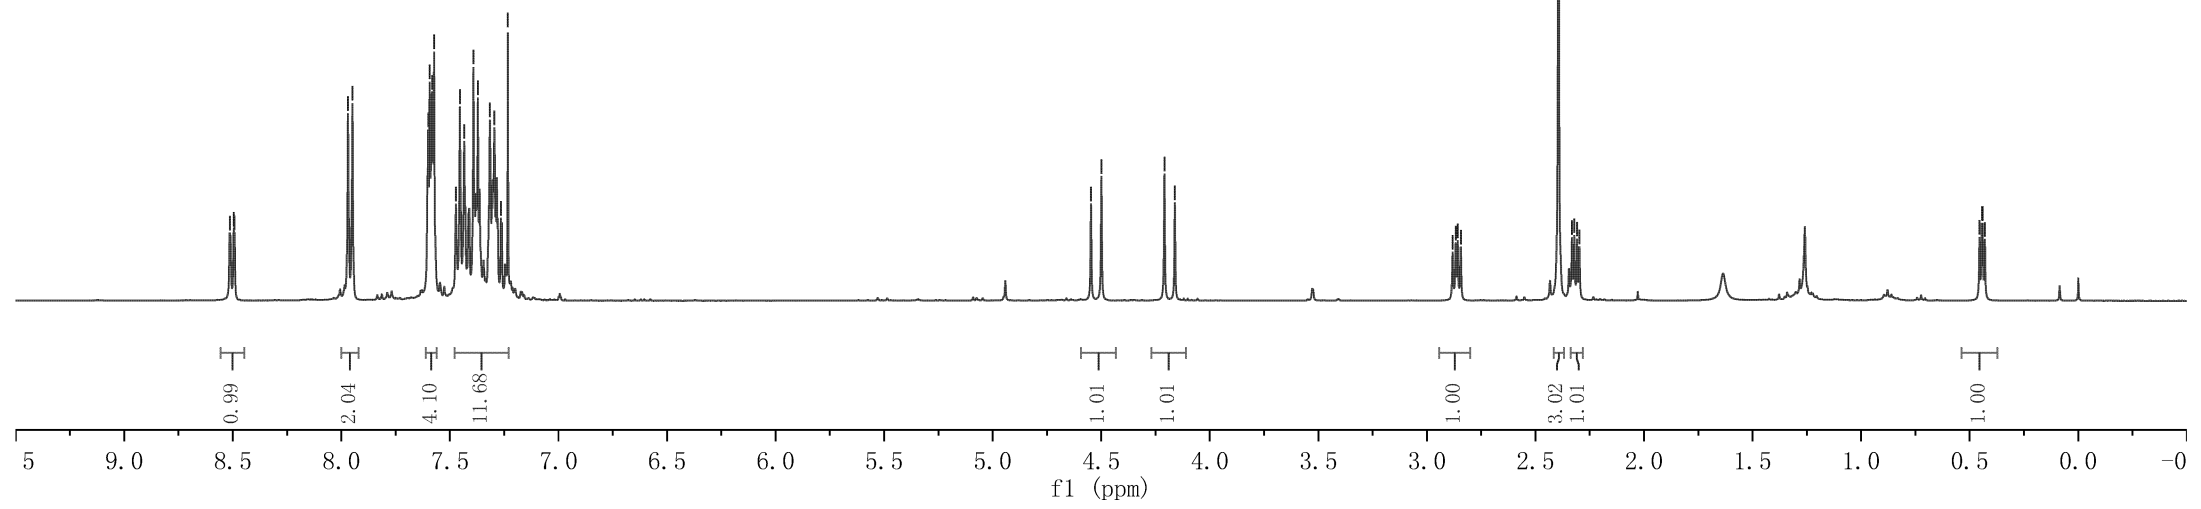

| Parameter                | Value               |
|--------------------------|---------------------|
| 1 Title                  | hf1-5-162-c-7.13    |
| 2 Origin                 | Bruker BioSpin GmbH |
| 3 Solvent                | CDC13               |
| 4 Temperature            | 298.8               |
| 5 Number of Scans        | 20                  |
| 6 Acquisition Time       | 1.3631              |
| 7 Acquisition Date       | 2018-07-13T09:45:55 |
| 8 Spectrometer Frequency | 100.61              |
| 9 Spectral Width         | 24038.5             |

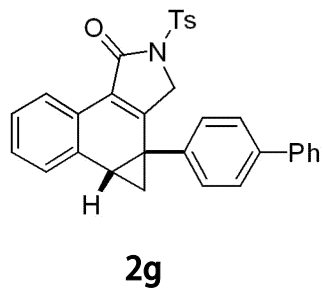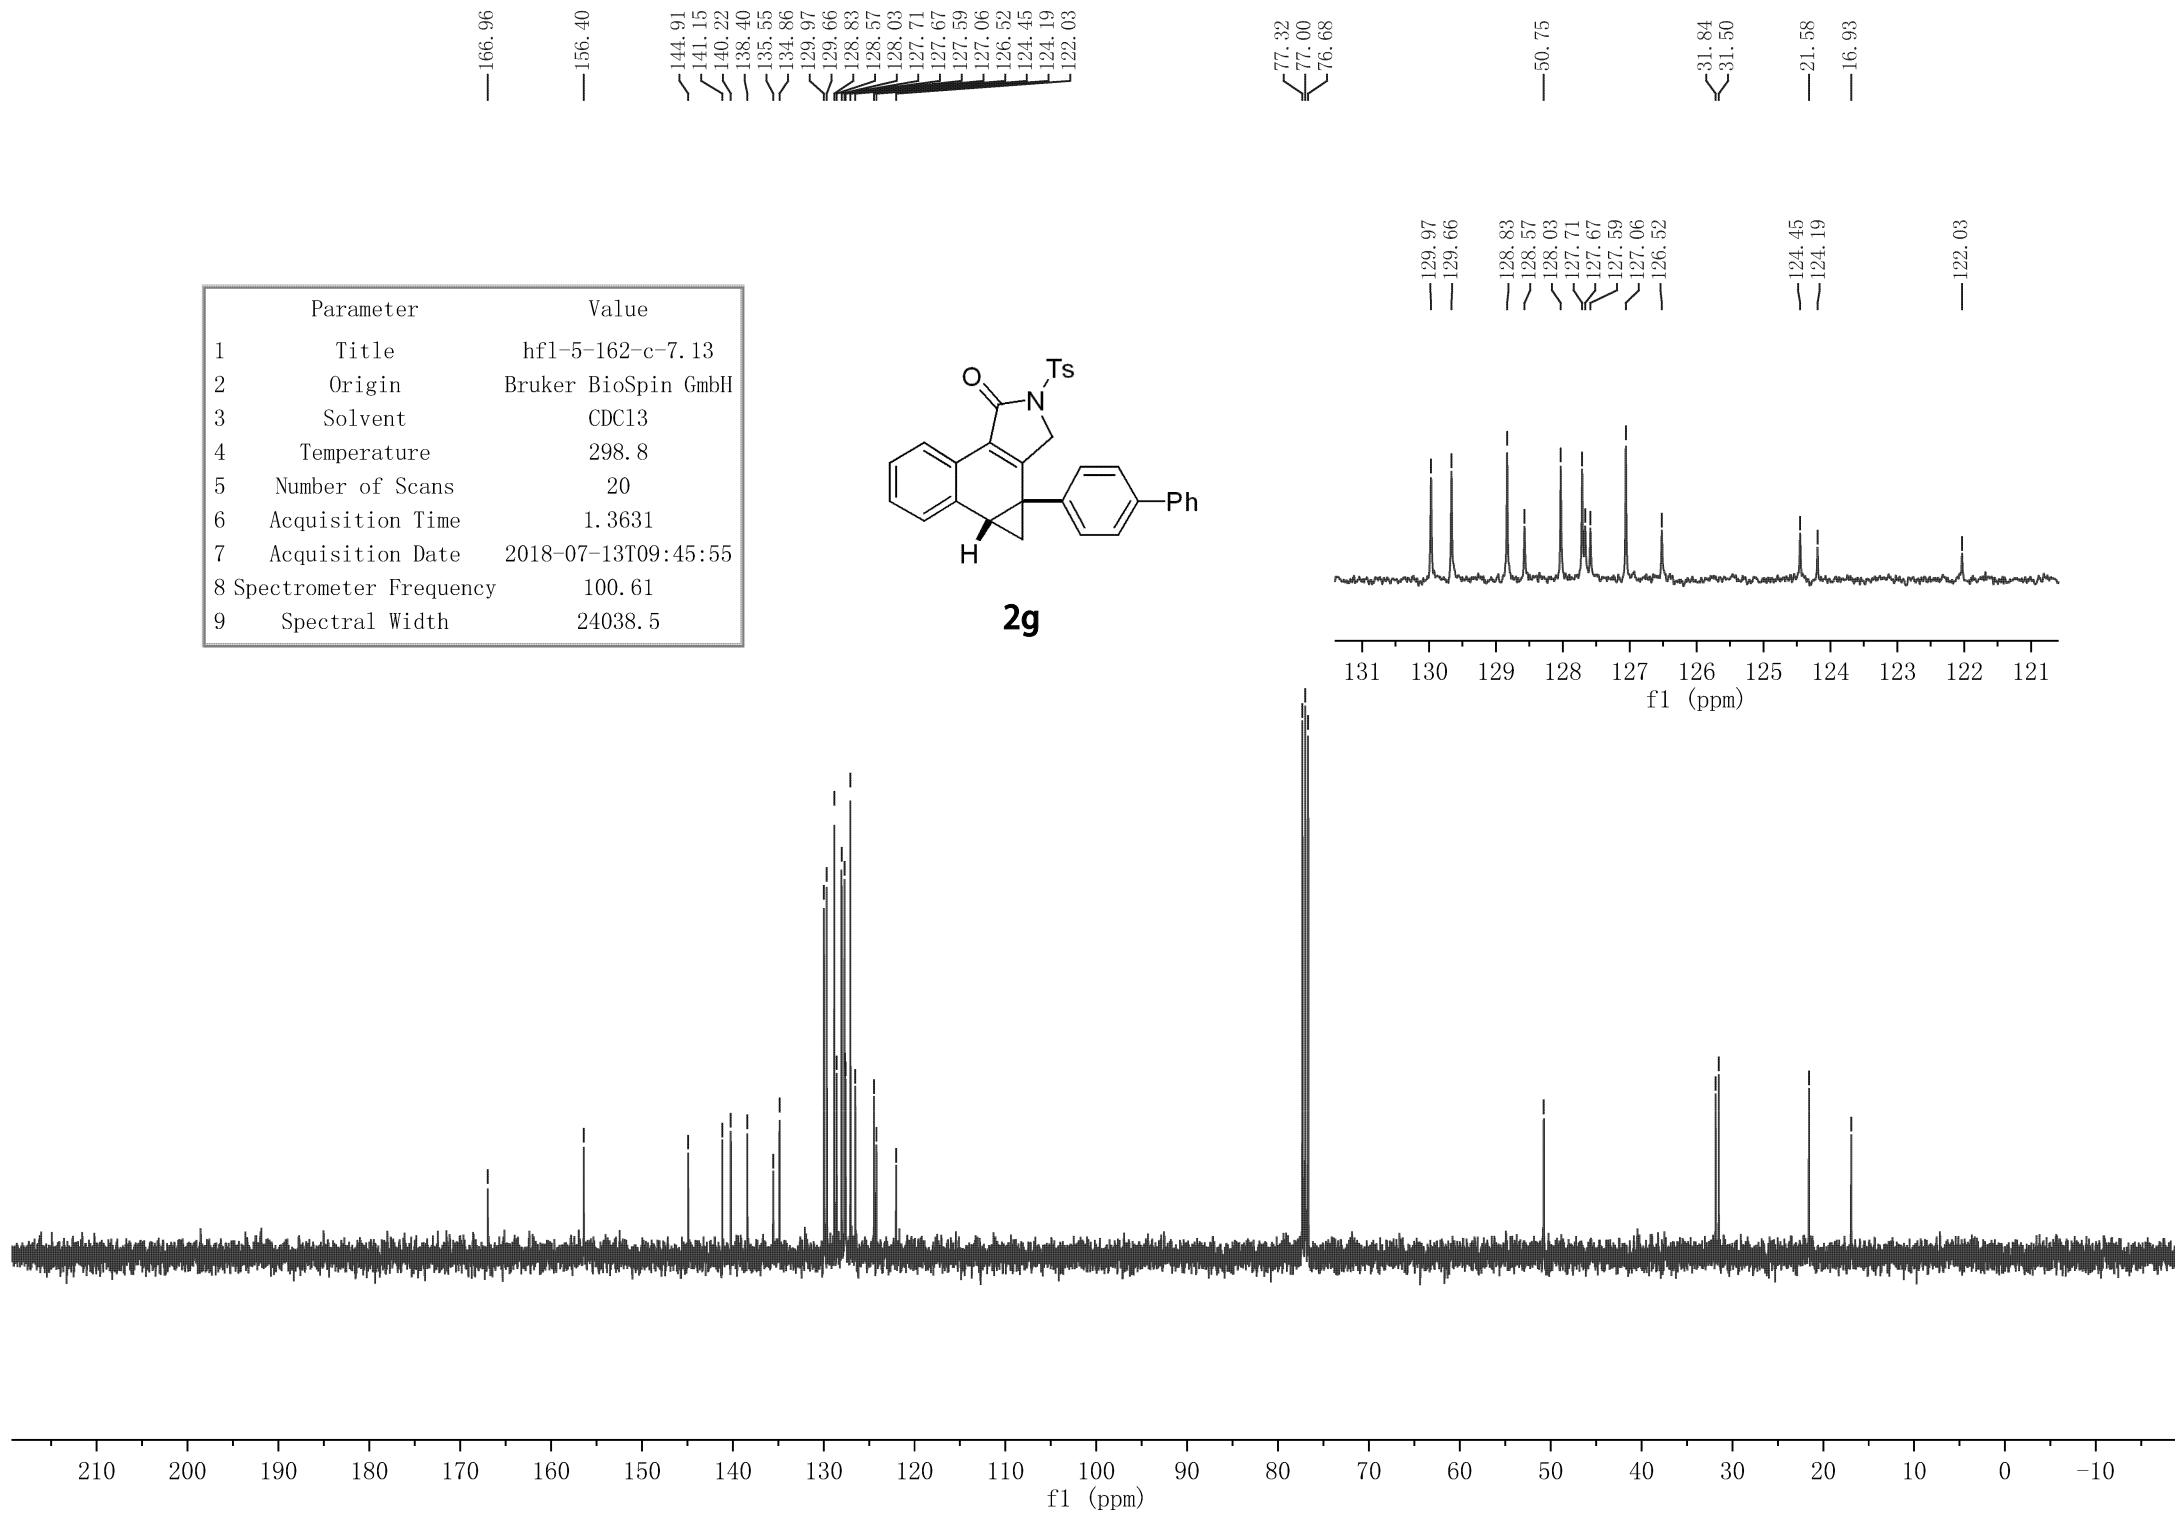

8.492  
8.474  
7.962  
7.941  
7.422  
7.404  
7.326  
7.305  
7.250  
7.237  
7.210  
7.077  
7.056  
7.034

4.499  
4.451  
4.104  
4.056

2.841  
2.827  
2.818  
2.804  
2.404  
2.261  
2.250  
2.237  
2.227

0.437  
0.424  
0.412

| Parameter                | Value               |
|--------------------------|---------------------|
| 1 Title                  | hfl-5-147-h         |
| 2 Origin                 | Bruker BioSpin GmbH |
| 3 Solvent                | CDC13               |
| 4 Temperature            | 299.1               |
| 5 Number of Scans        | 9                   |
| 6 Acquisition Time       | 3.9846              |
| 7 Acquisition Date       | 2018-07-07T22:27:28 |
| 8 Spectrometer Frequency | 400.13              |
| 9 Spectral Width         | 8223.7              |

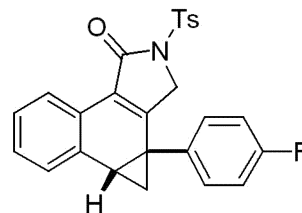

2h

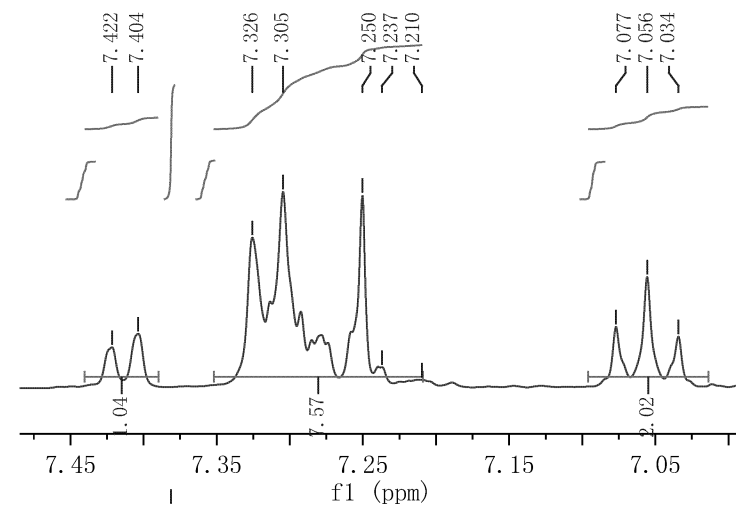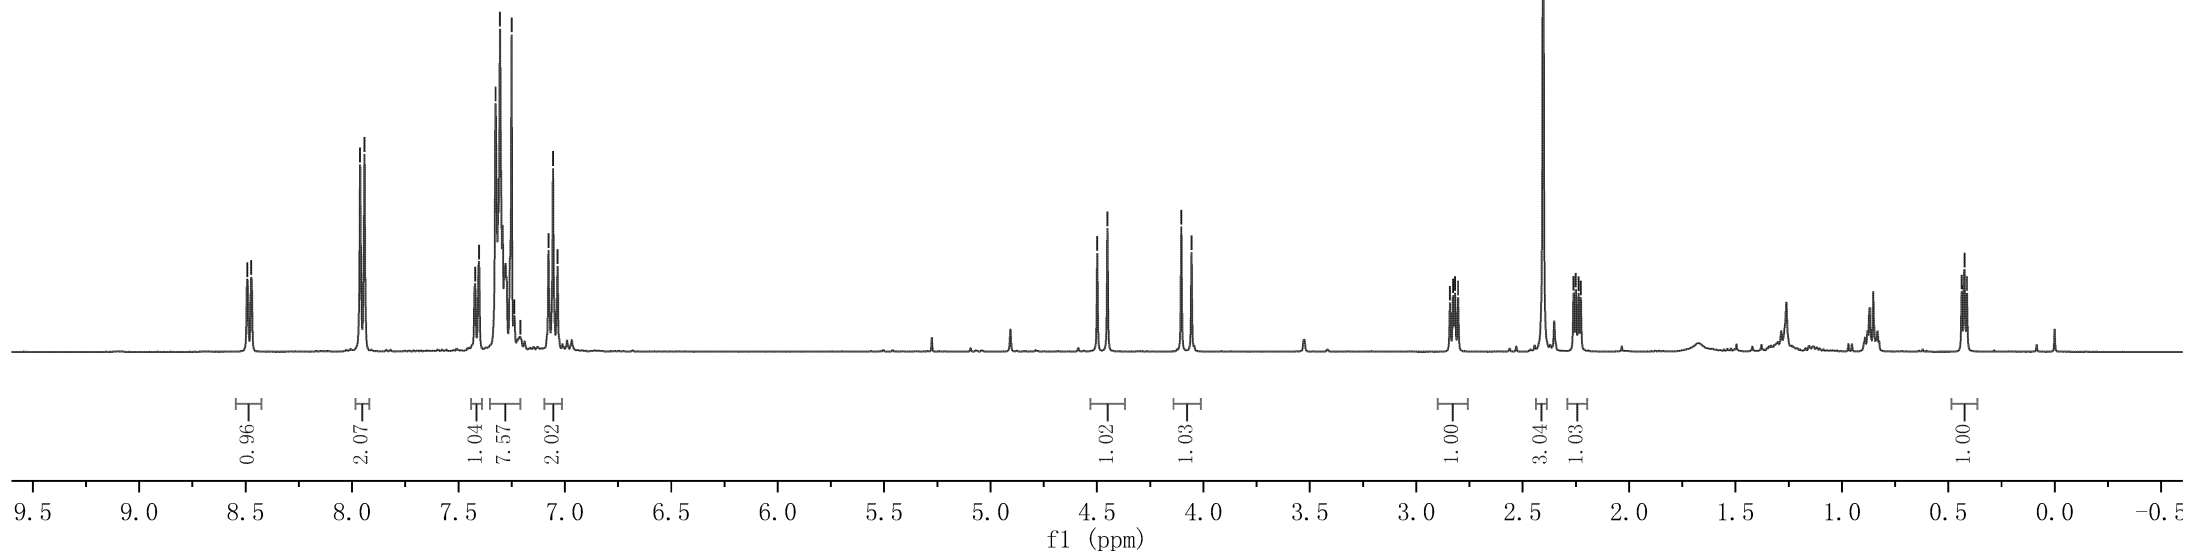



| Parameter                | Value               |
|--------------------------|---------------------|
| 1 Title                  | hf1-5-147-C         |
| 2 Origin                 | Bruker BioSpin GmbH |
| 3 Solvent                | CDC13               |
| 4 Temperature            | 299.3               |
| 5 Number of Scans        | 150                 |
| 6 Acquisition Time       | 1.3631              |
| 7 Acquisition Date       | 2018-07-07T22:30:02 |
| 8 Spectrometer Frequency | 100.61              |
| 9 Spectral Width         | 24038.5             |

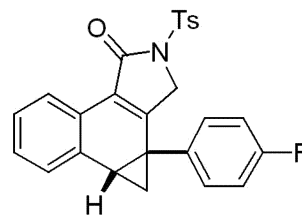

**2h**

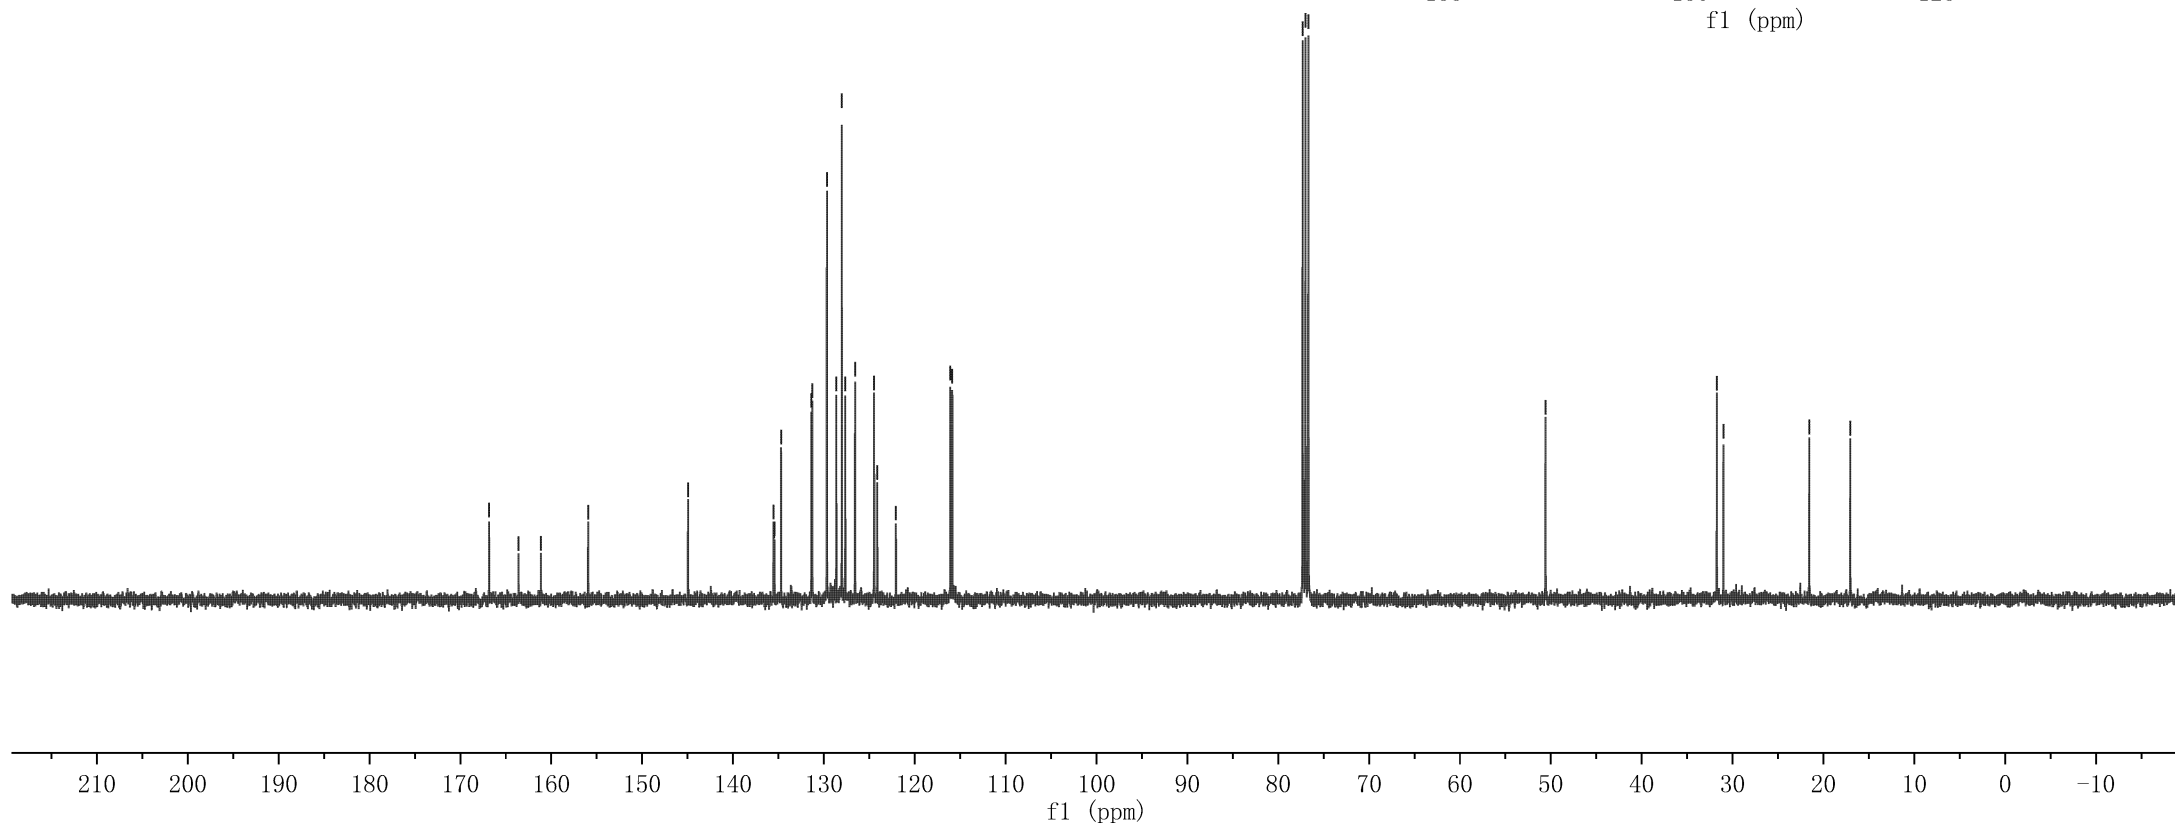

166.84  
163.60  
161.14  
155.94  
144.95  
134.71  
131.37  
131.28  
129.67  
128.63  
128.02  
127.64  
126.57  
124.47  
124.08  
116.08  
115.87

77.32  
77.00  
76.68

50.59

31.74  
31.01

21.56  
17.05

135.54  
135.47  
135.43  
134.71

131.37  
131.28

129.67

128.63  
128.02  
127.64

126.57

124.47  
124.12

122.07

135  
130  
125  
f1 (ppm)

210 200 190 180 170 160 150 140 130 120 110 100 90 80 70 60 50 40 30 20 10 0 -10

f1 (ppm)

| Parameter                | Value               |
|--------------------------|---------------------|
| 1 Title                  | scy-15-2h           |
| 2 Origin                 | Bruker BioSpin GmbH |
| 3 Solvent                | CDCl3               |
| 4 Temperature            | 295.4               |
| 5 Number of Scans        | 13                  |
| 6 Acquisition Time       | 0.7340              |
| 7 Acquisition Date       | 2022-01-08T17:54:12 |
| 8 Spectrometer Frequency | 376.31              |
| 9 Spectral Width         | 89285.7             |

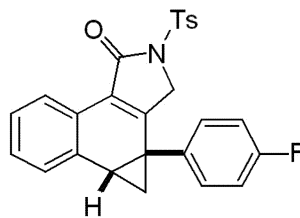

**2h**

—112.97

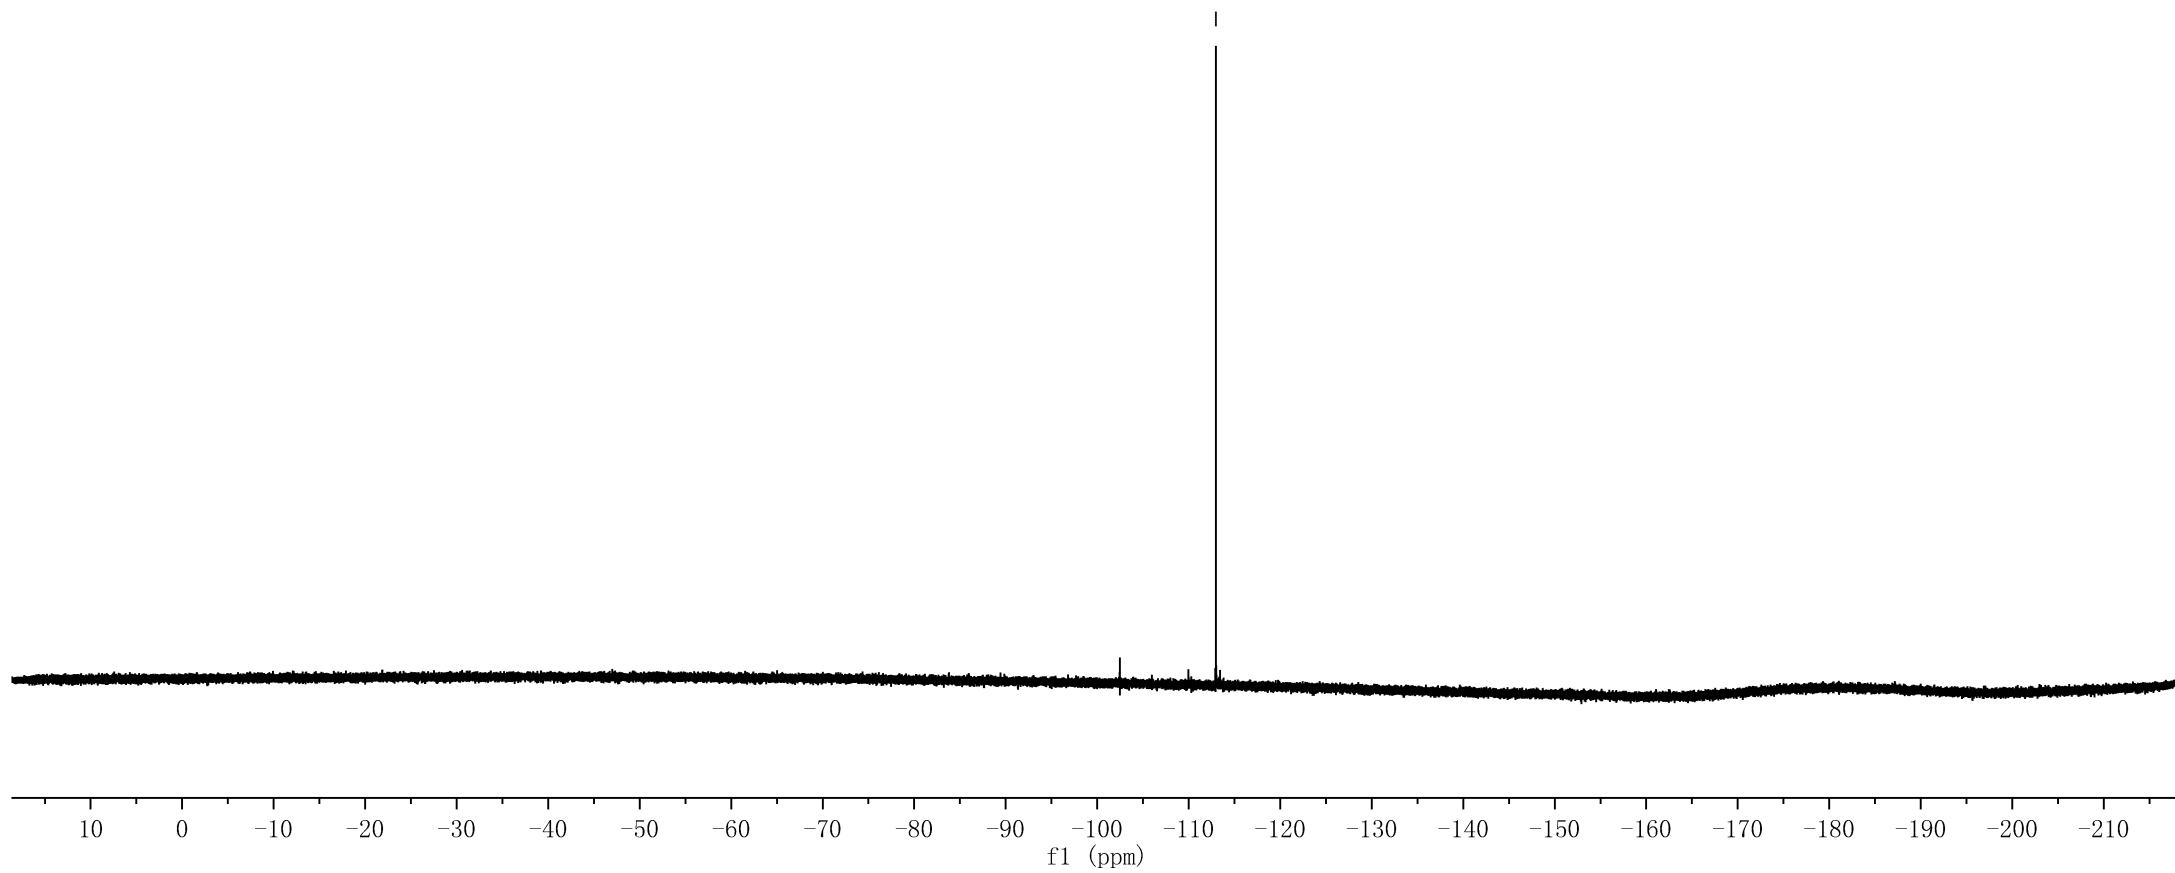

8.493  
8.475  
8.472  
7.964  
7.944  
7.419  
7.401  
7.362  
7.341  
7.331  
7.310  
7.280  
7.259  
7.254

4.493  
4.445  
4.109  
4.061

2.839  
2.825  
2.815  
2.801  
2.411  
2.260  
2.249  
2.236  
2.226

0.455  
0.444  
0.442  
0.430

| Parameter                | Value               |
|--------------------------|---------------------|
| 1 Title                  | HFL-5-148-H-7.16-1  |
| 2 Origin                 | Bruker BioSpin GmbH |
| 3 Solvent                | CDC13               |
| 4 Temperature            | 299.0               |
| 5 Number of Scans        | 6                   |
| 6 Acquisition Time       | 3.9846              |
| 7 Acquisition Date       | 2018-07-16T11:45:02 |
| 8 Spectrometer Frequency | 400.13              |
| 9 Spectral Width         | 8223.7              |

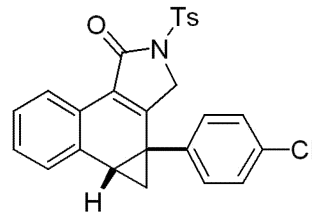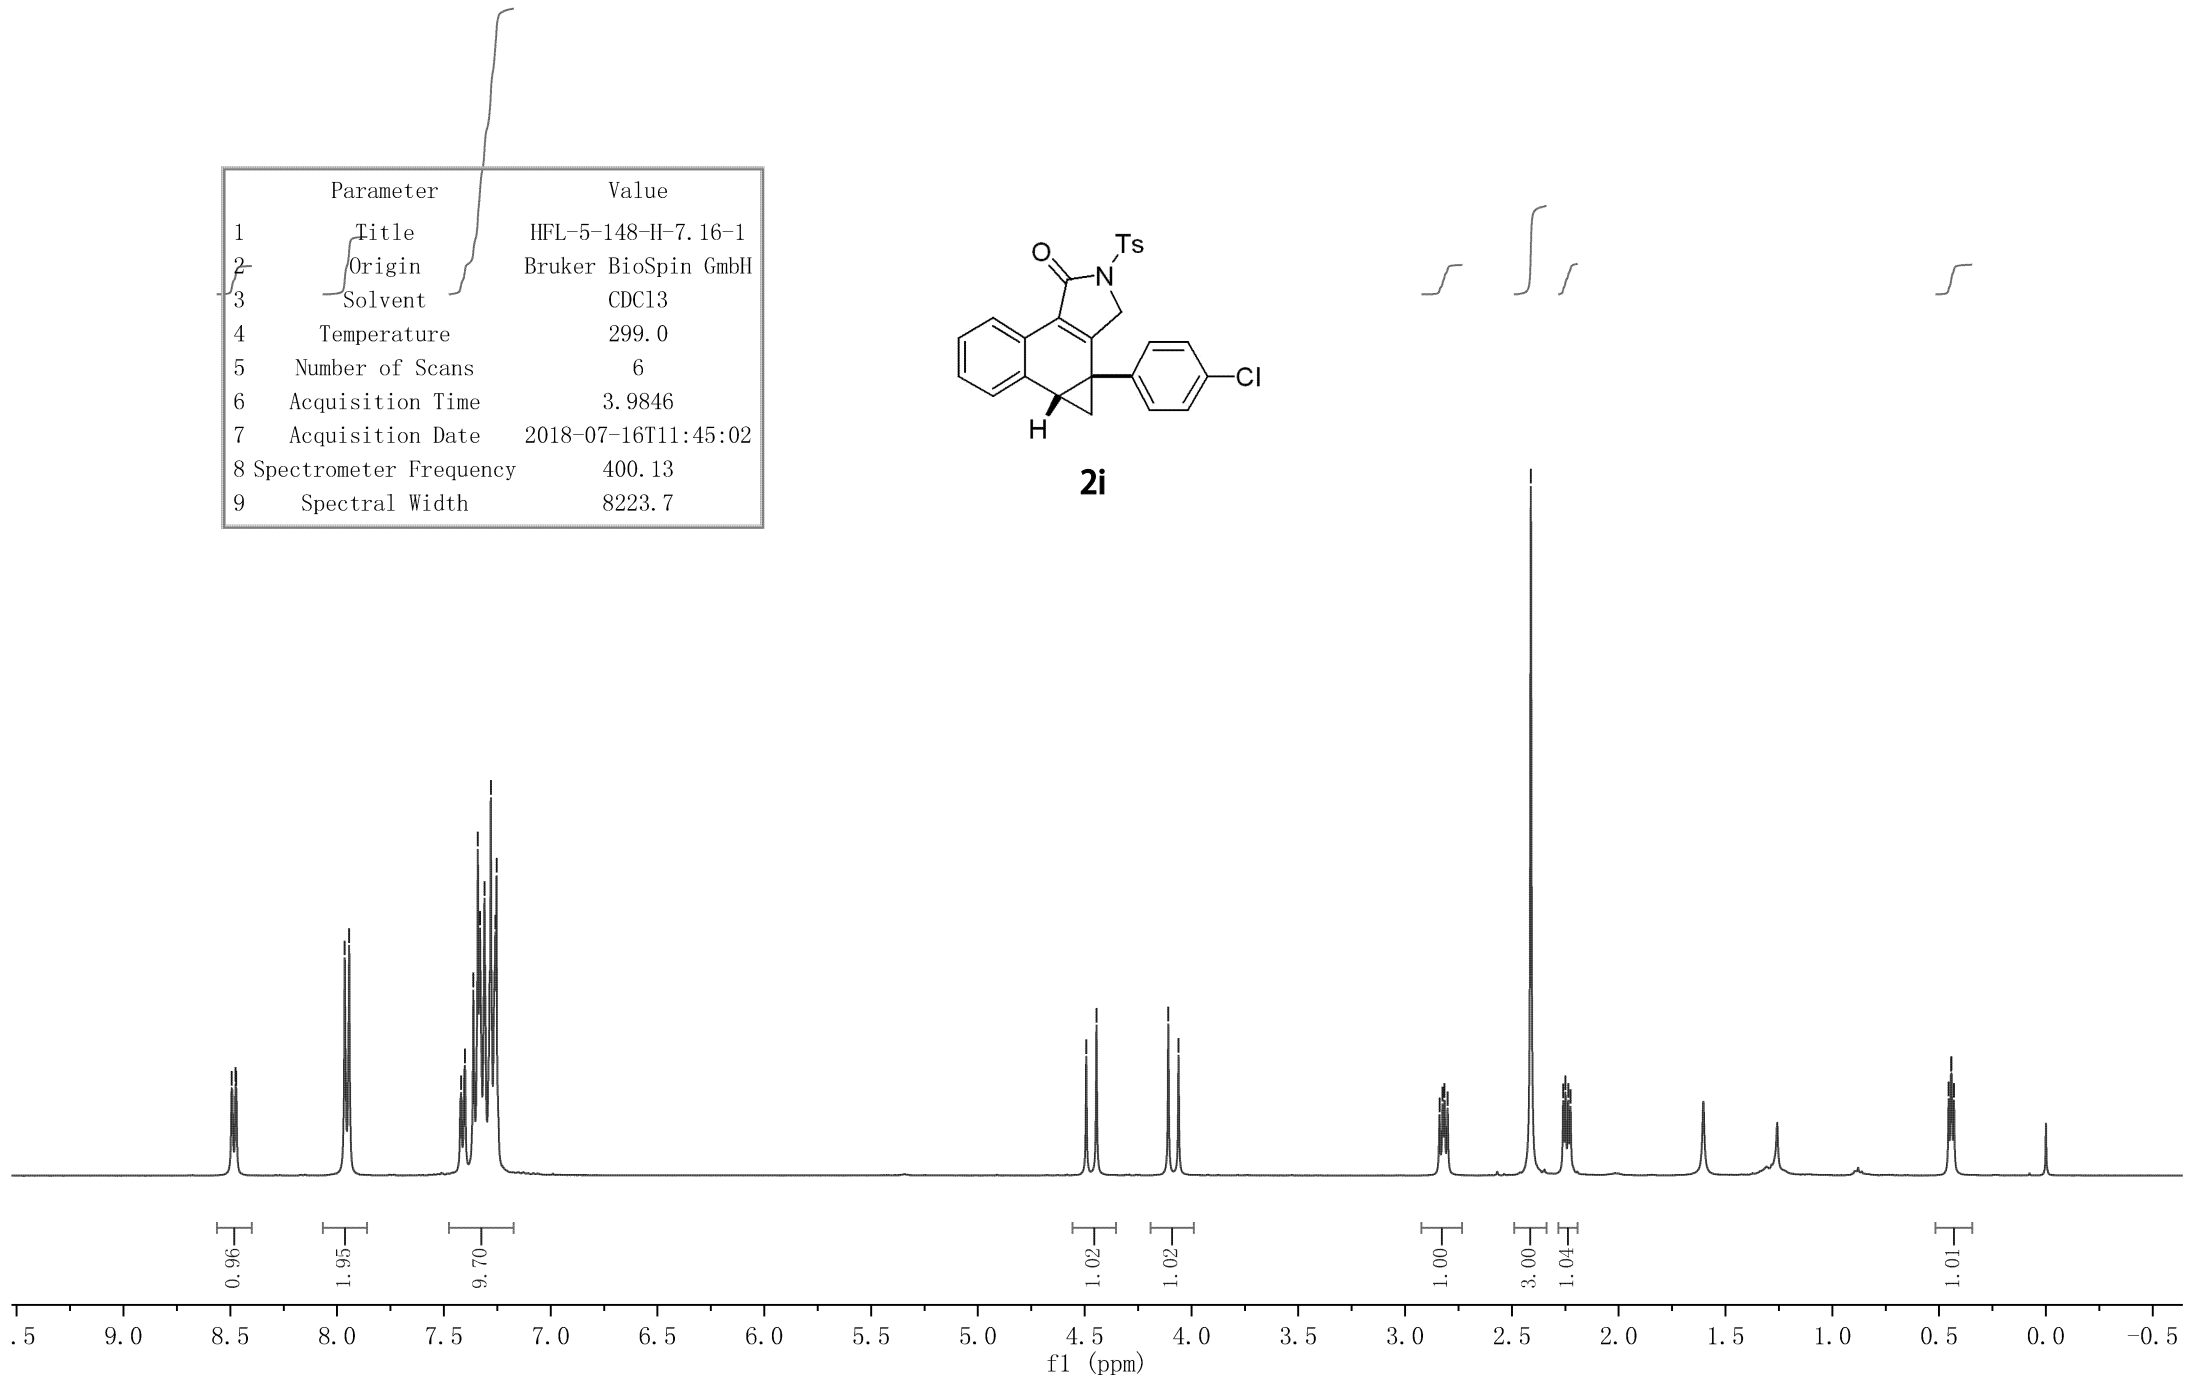

| Parameter                | Value               |
|--------------------------|---------------------|
| 1 Title                  | HFL-5-148-C-7.16-1  |
| 2 Origin                 | Bruker BioSpin GmbH |
| 3 Solvent                | CDC13               |
| 4 Temperature            | 299.4               |
| 5 Number of Scans        | 53                  |
| 6 Acquisition Time       | 1.3631              |
| 7 Acquisition Date       | 2018-07-16T11:48:37 |
| 8 Spectrometer Frequency | 100.61              |
| 9 Spectral Width         | 24038.5             |

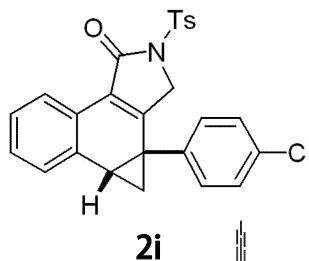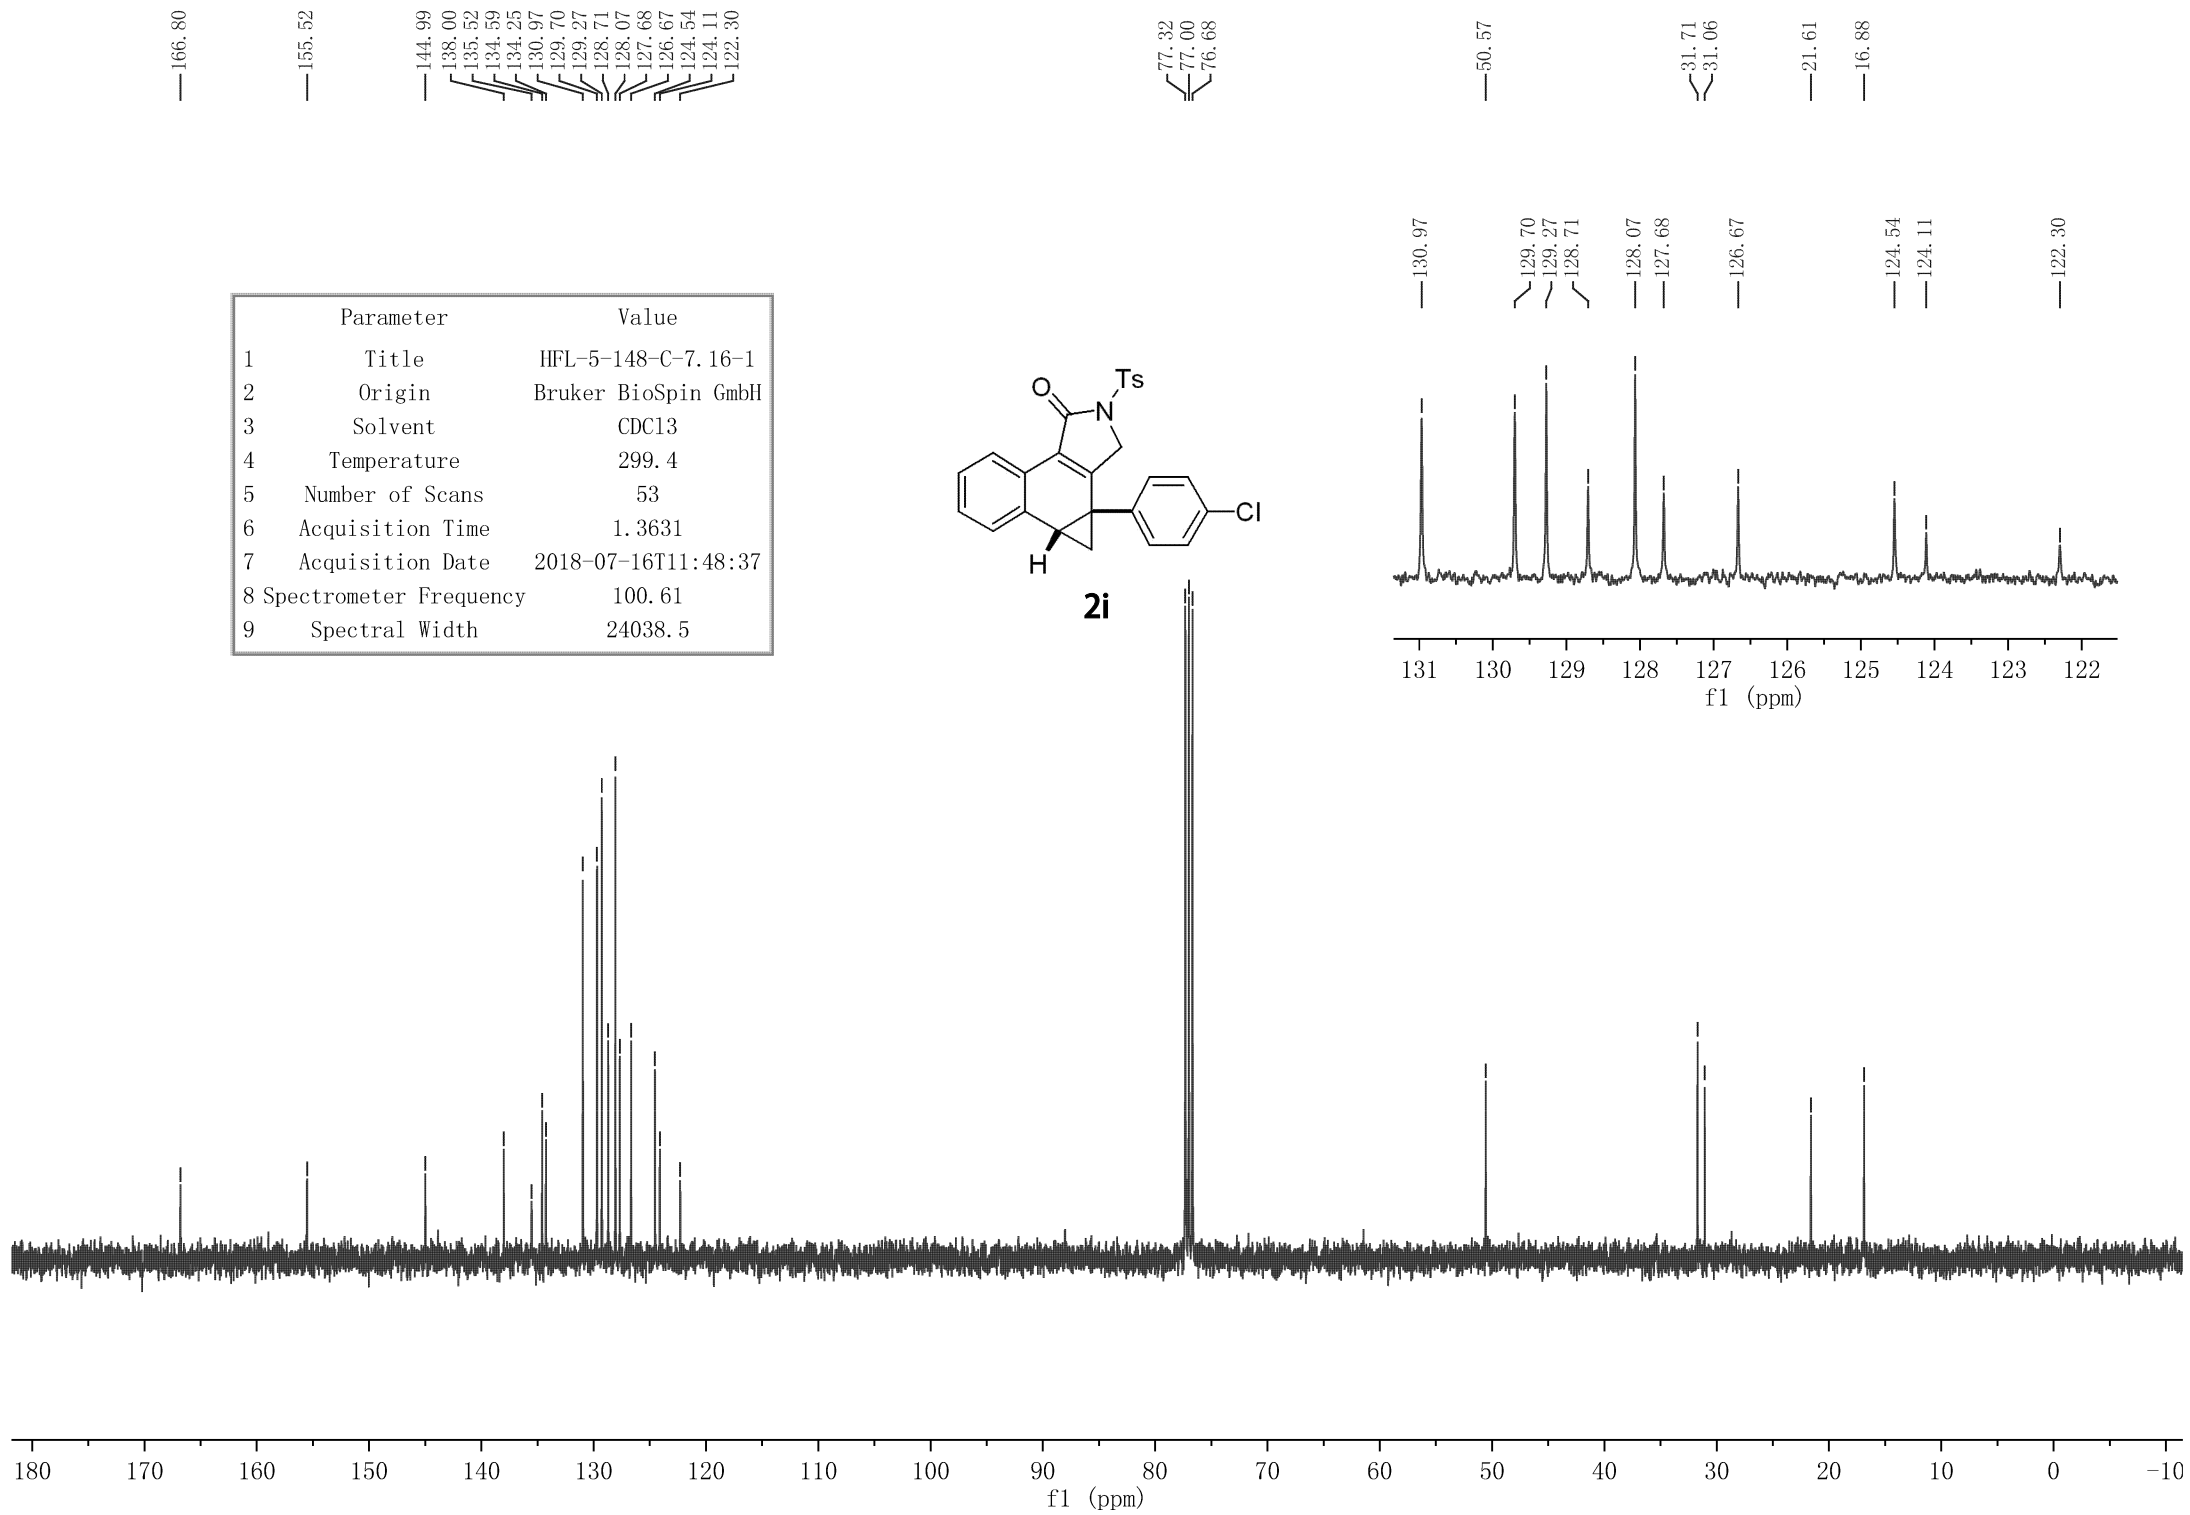

8.493  
8.490  
8.474  
8.470

7.963  
7.943  
7.515  
7.494  
7.421  
7.417  
7.402  
7.399  
7.329  
7.308  
7.283  
7.253  
7.219  
7.198  
7.192

4.493  
4.445

4.109  
4.061

2.836  
2.822  
2.813  
2.799

2.409  
2.256  
2.245  
2.232  
2.221

0.451  
0.440  
0.437  
0.426

| Parameter                | Value               |
|--------------------------|---------------------|
| 1 Title                  | HFL-5-149-H-7.16    |
| 2 Origin                 | Bruker BioSpin GmbH |
| 3 Solvent                | CDC13               |
| 4 Temperature            | 299.3               |
| 5 Number of Scans        | 8                   |
| 6 Acquisition Time       | 3.9846              |
| 7 Acquisition Date       | 2018-07-16T11:52:57 |
| 8 Spectrometer Frequency | 400.13              |
| 9 Spectral Width         | 8223.7              |

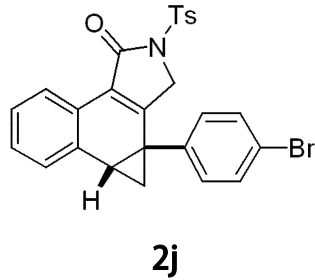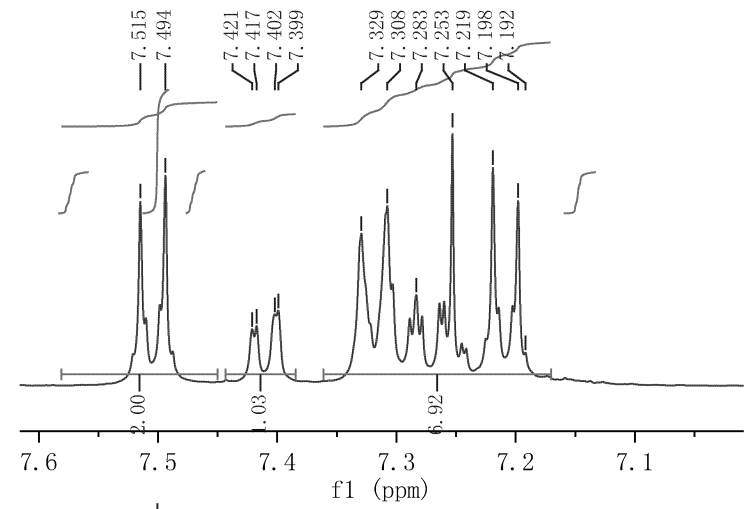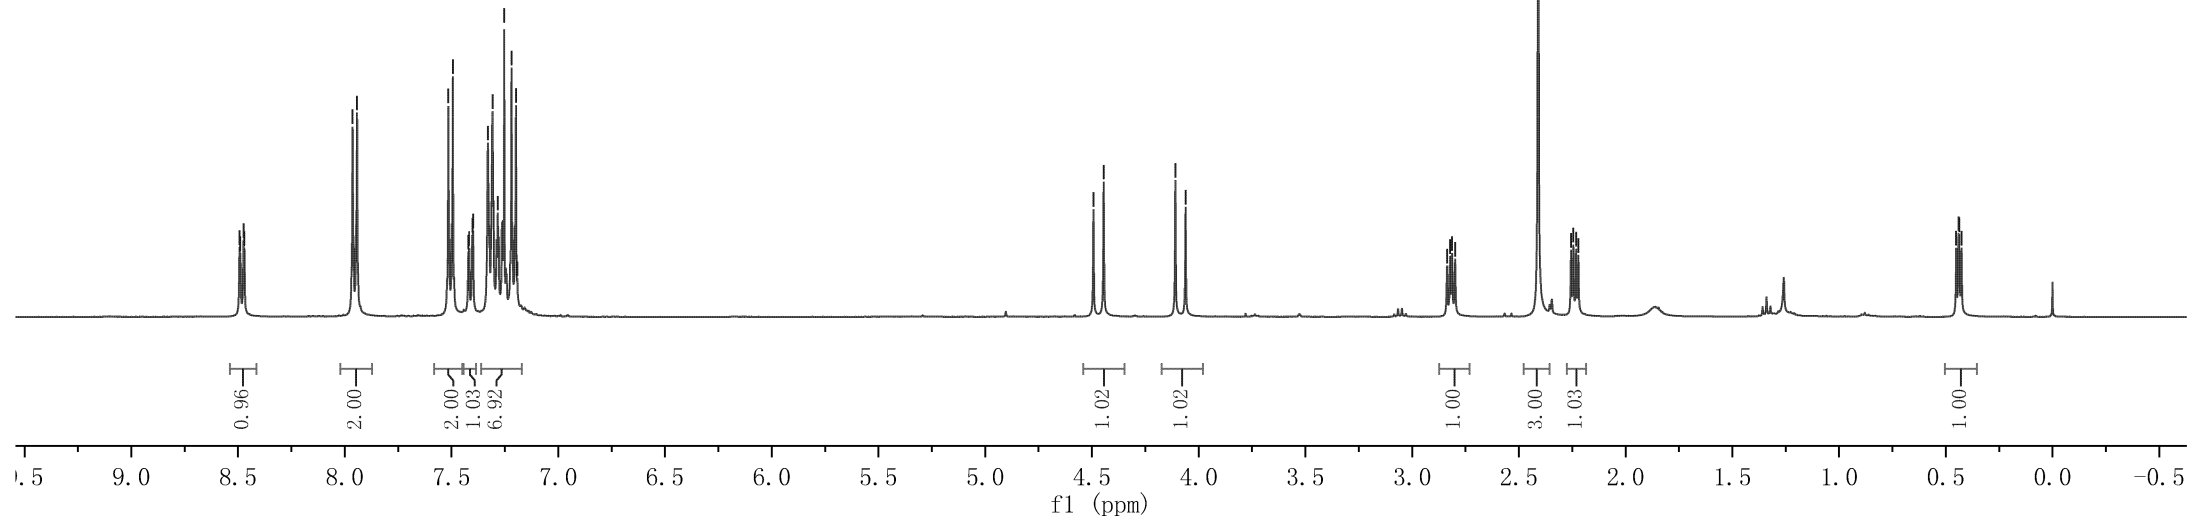

| Parameter                | Value               |
|--------------------------|---------------------|
| 1 Title                  | HFL-5-149-C-7.16    |
| 2 Origin                 | Bruker BioSpin GmbH |
| 3 Solvent                | CDC13               |
| 4 Temperature            | 299.2               |
| 5 Number of Scans        | 28                  |
| 6 Acquisition Time       | 1.3631              |
| 7 Acquisition Date       | 2018-07-16T11:54:43 |
| 8 Spectrometer Frequency | 100.61              |
| 9 Spectral Width         | 24038.5             |

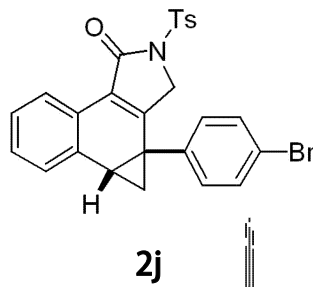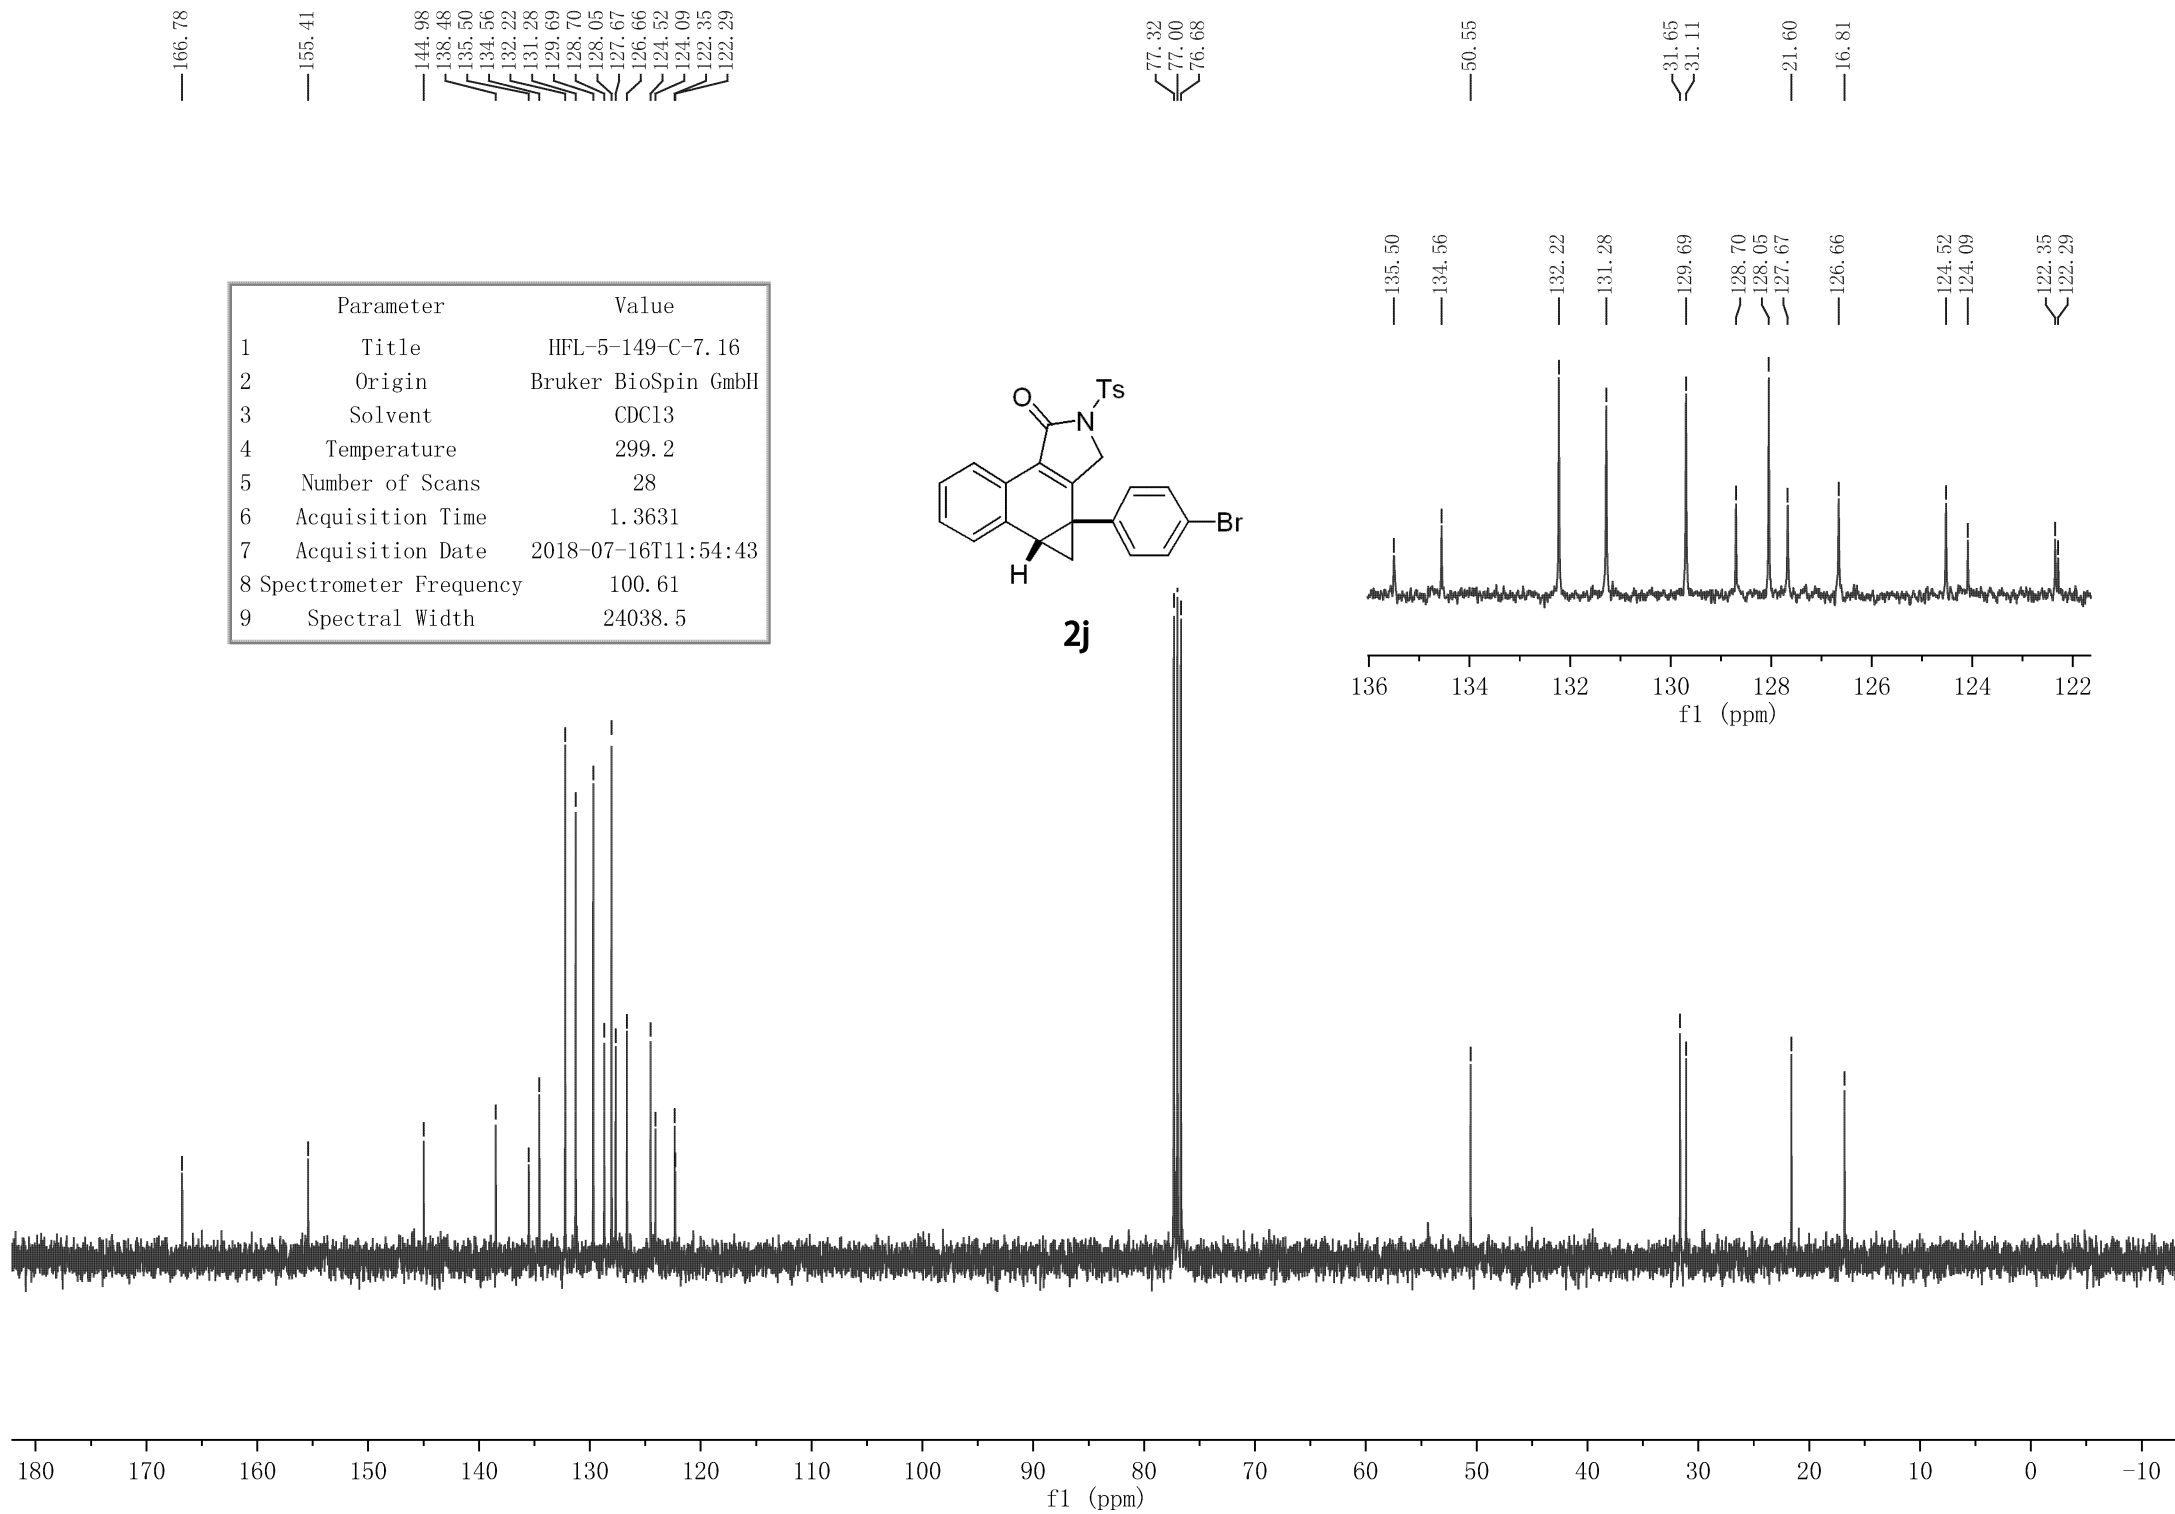

8.493  
8.474  
8.471

7.966  
7.946  
7.423  
7.420  
7.402  
7.329  
7.308  
7.278  
7.251  
7.236  
7.160  
7.140  
7.127  
7.109

4.500  
4.452

4.149  
4.101

2.843  
2.829  
2.819  
2.805  
2.411  
2.360  
2.291  
2.280  
2.267  
2.257

0.419  
0.408  
0.405  
0.394

| Parameter                | Value               |
|--------------------------|---------------------|
| 1 Title                  | hfl-5-184-h-7.18    |
| 2 Origin                 | Bruker BioSpin GmbH |
| 3 Solvent                | CDC13               |
| 4 Temperature            | 299.2               |
| 5 Number of Scans        | 7                   |
| 6 Acquisition Time       | 3.9846              |
| 7 Acquisition Date       | 2018-07-18T11:30:32 |
| 8 Spectrometer Frequency | 400.13              |
| 9 Spectral Width         | 8223.7              |

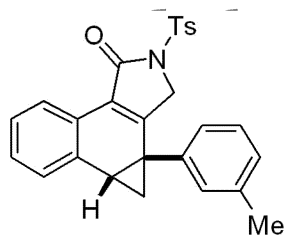

**2k**

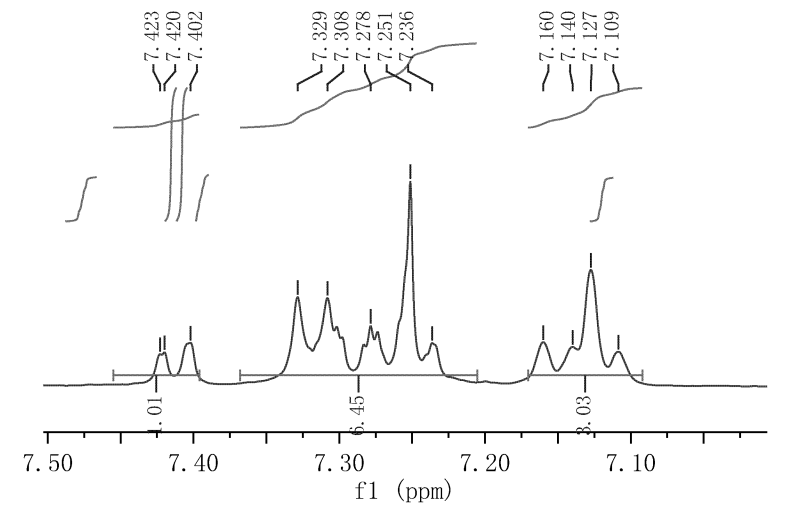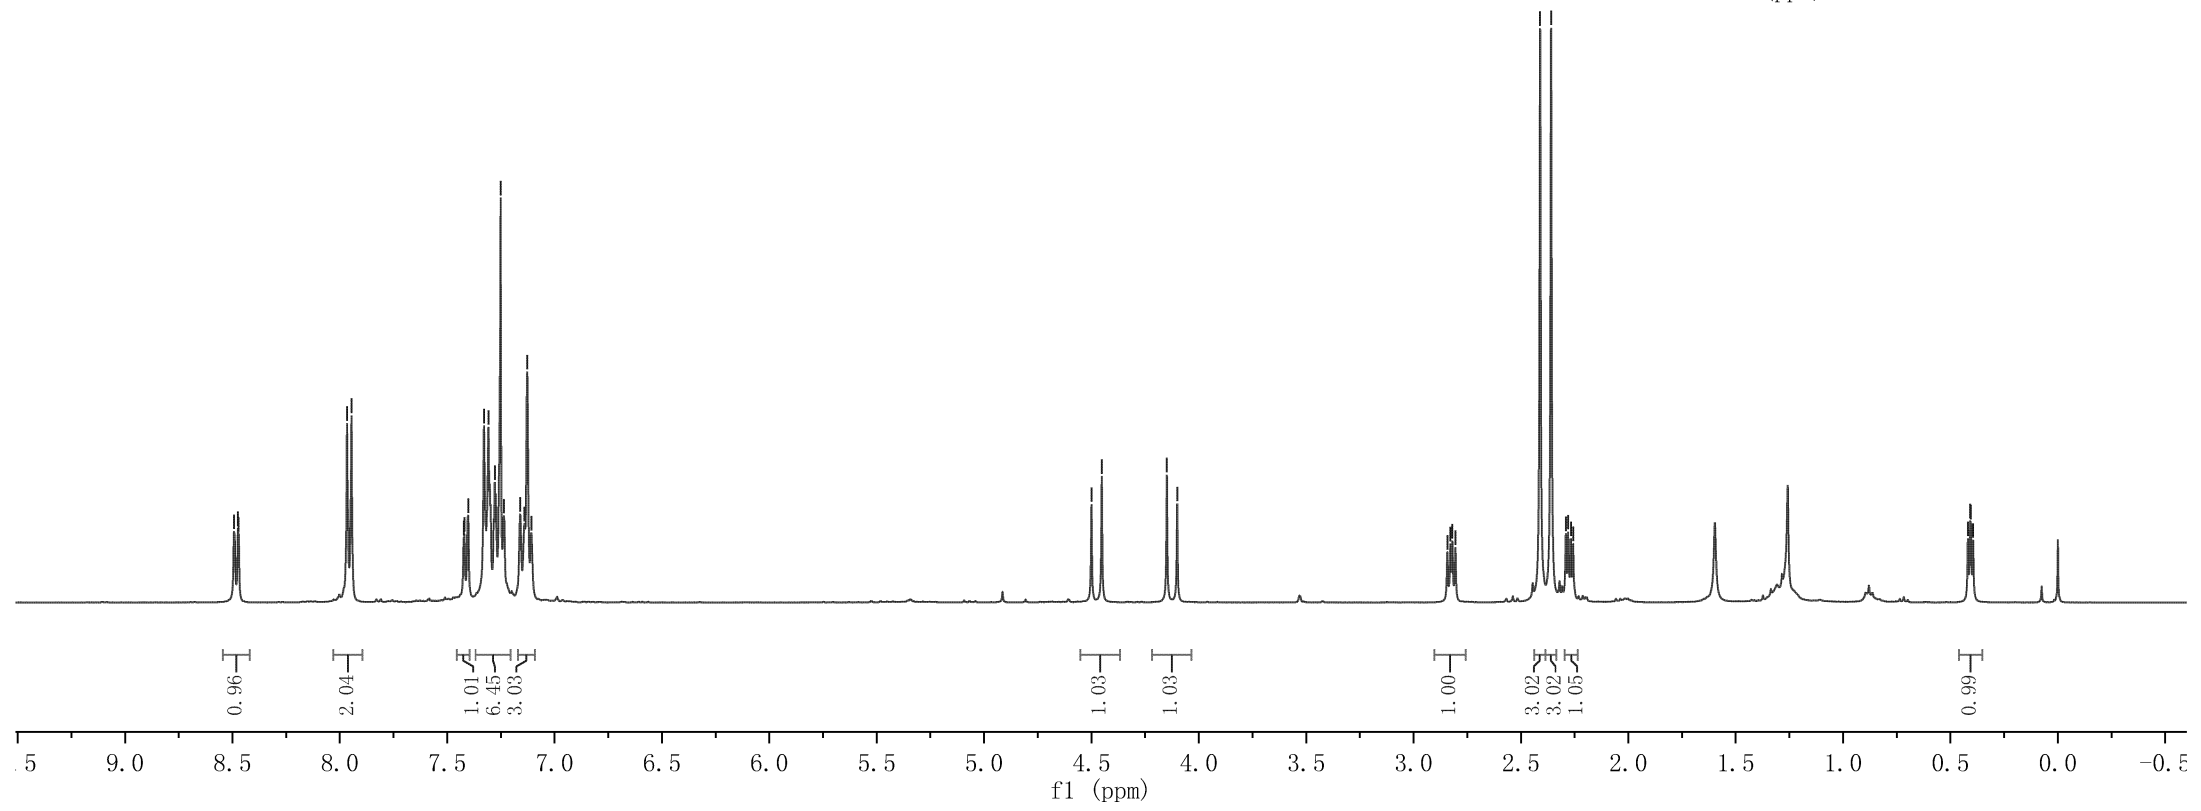

| Parameter                | Value               |
|--------------------------|---------------------|
| 1 Title                  | hfl-5-184-c-7.18    |
| 2 Origin                 | Bruker BioSpin GmbH |
| 3 Solvent                | CDC13               |
| 4 Temperature            | 299.3               |
| 5 Number of Scans        | 51                  |
| 6 Acquisition Time       | 1.3631              |
| 7 Acquisition Date       | 2018-07-18T11:32:46 |
| 8 Spectrometer Frequency | 100.61              |
| 9 Spectral Width         | 24038.5             |

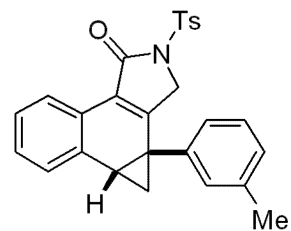

**2k**

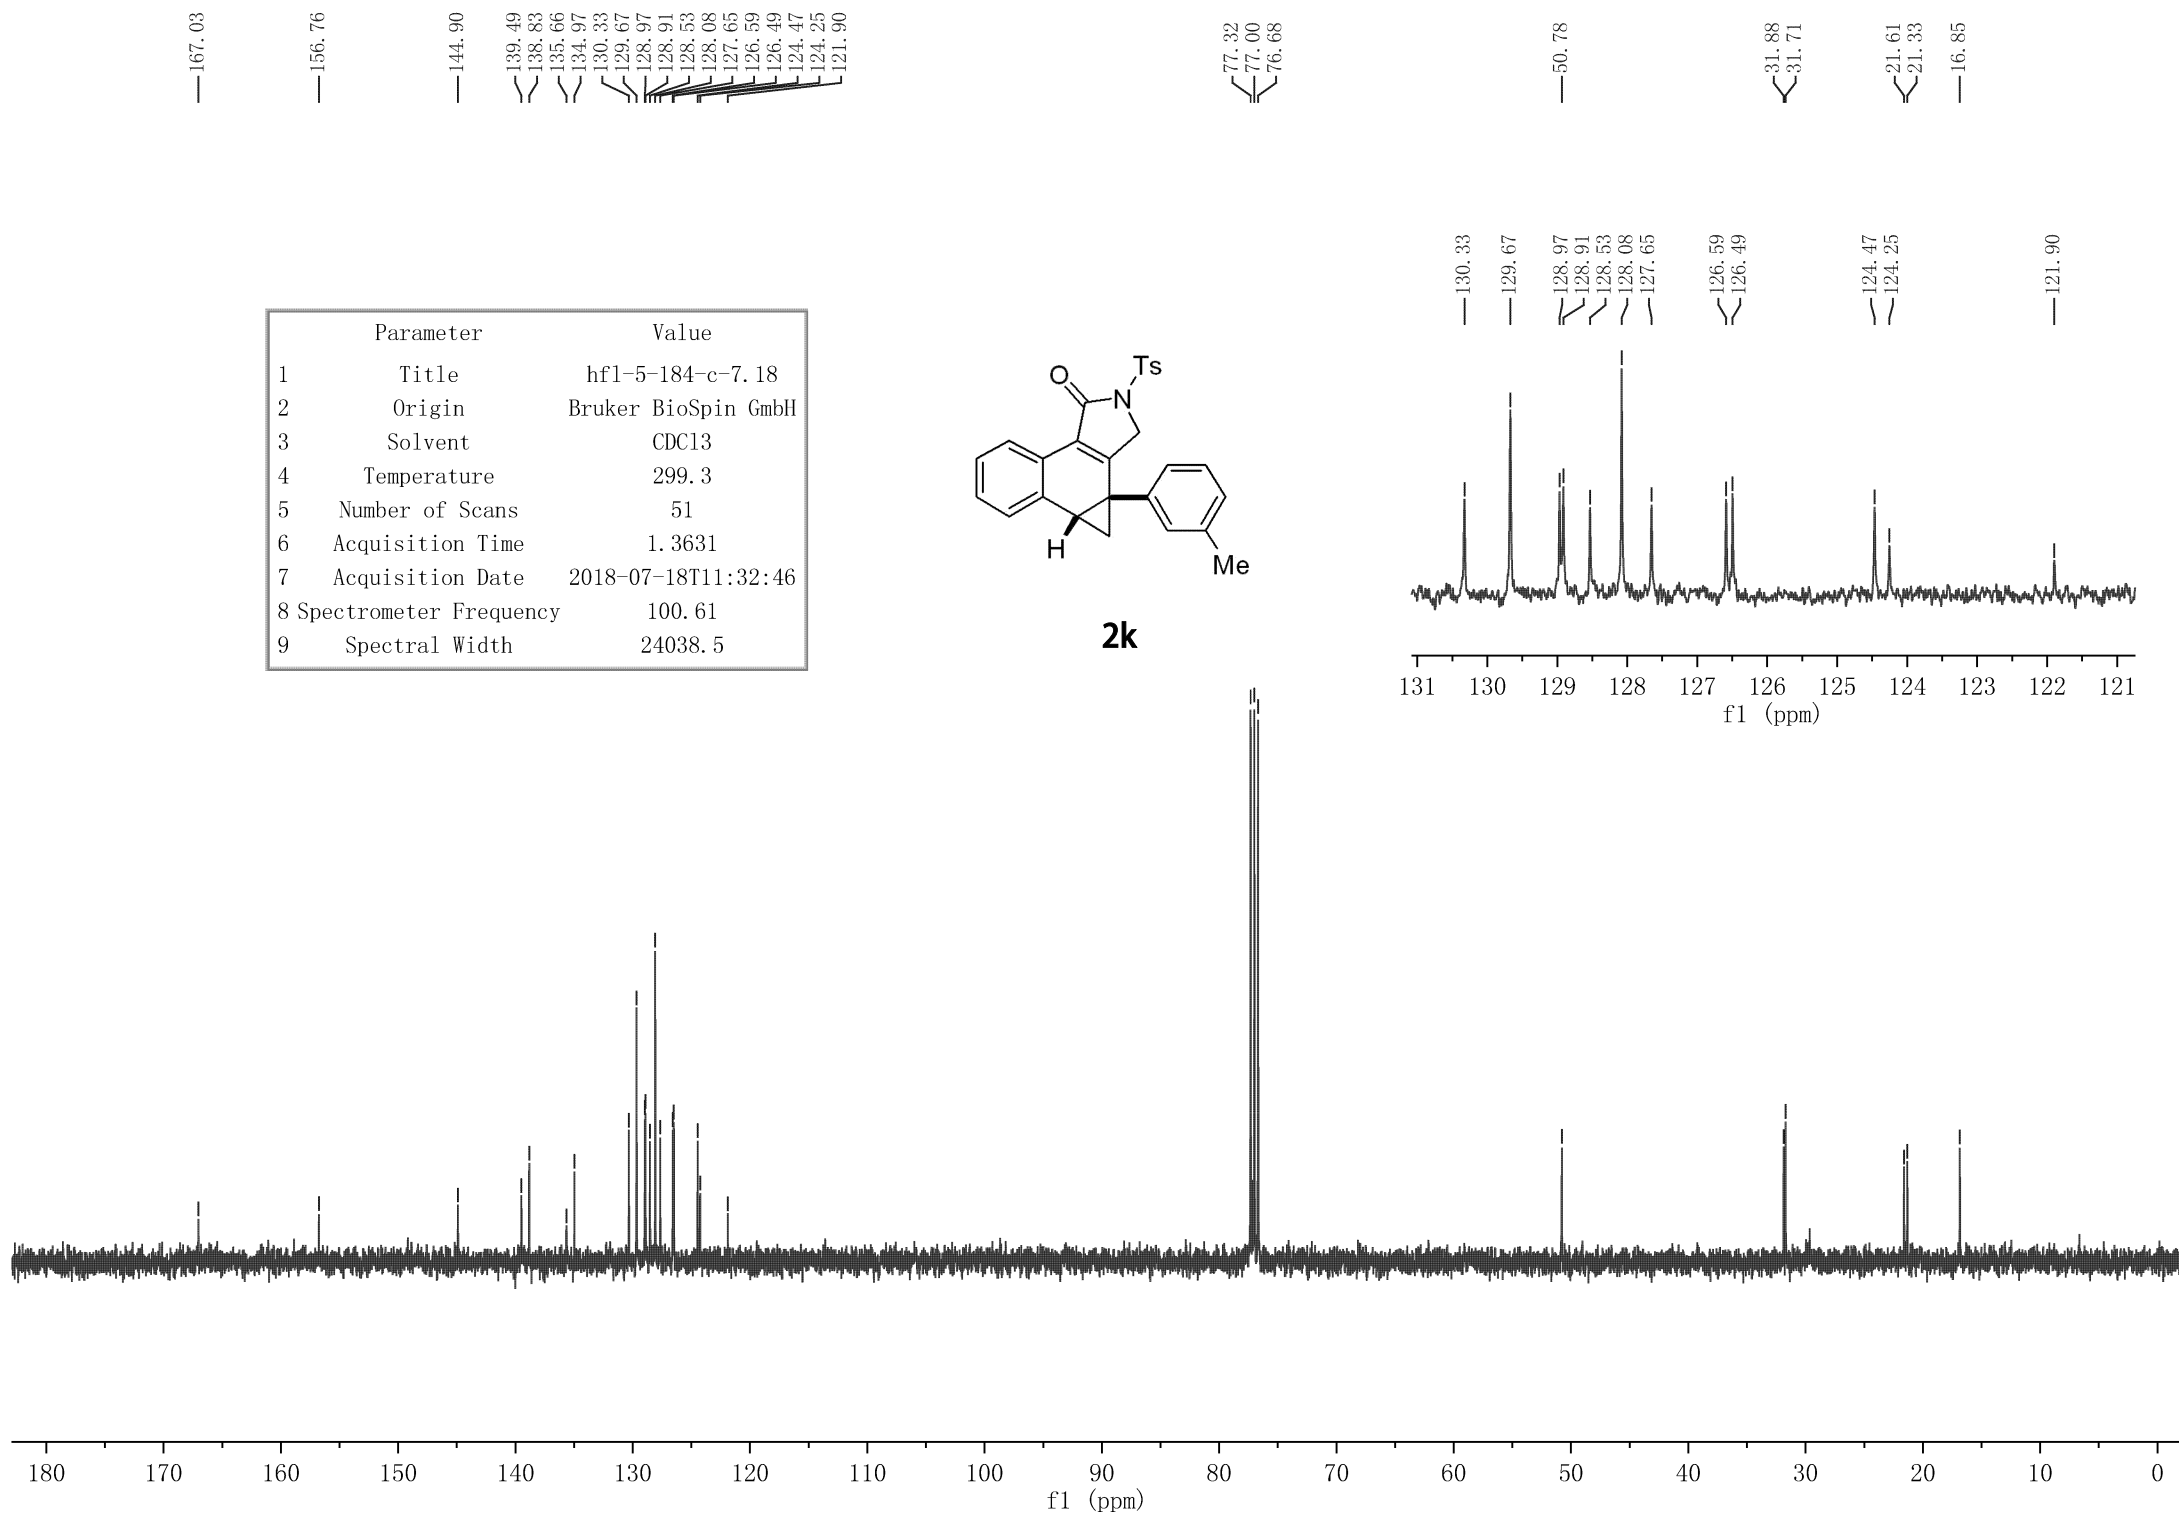



8.496  
8.492  
8.477  
8.473

7.964  
7.943

7.421  
7.406  
7.403  
7.325  
7.302  
7.283  
7.249  
6.916  
6.899  
6.885  
6.866  
6.839  
6.834

4.516  
4.468

4.167  
4.119

3.803

2.862  
2.847  
2.838  
2.824

2.404  
2.288  
2.278  
2.265  
2.254

0.417  
0.406  
0.403  
0.392

| Parameter                | Value               |
|--------------------------|---------------------|
| 1 Title                  | hf1-5-197-h-8.18    |
| 2 Origin                 | Bruker/BioSpin GmbH |
| 3 Solvent                | CDC13               |
| 4 Temperature            | 296.8               |
| 5 Number of Scans        | 7                   |
| 6 Acquisition Time       | 3.9846              |
| 7 Acquisition Date       | 2018-08-18T20:38:45 |
| 8 Spectrometer Frequency | 400.13              |
| 9 Spectral Width         | 8223.7              |

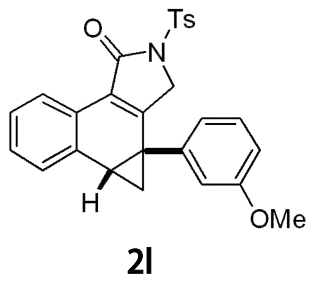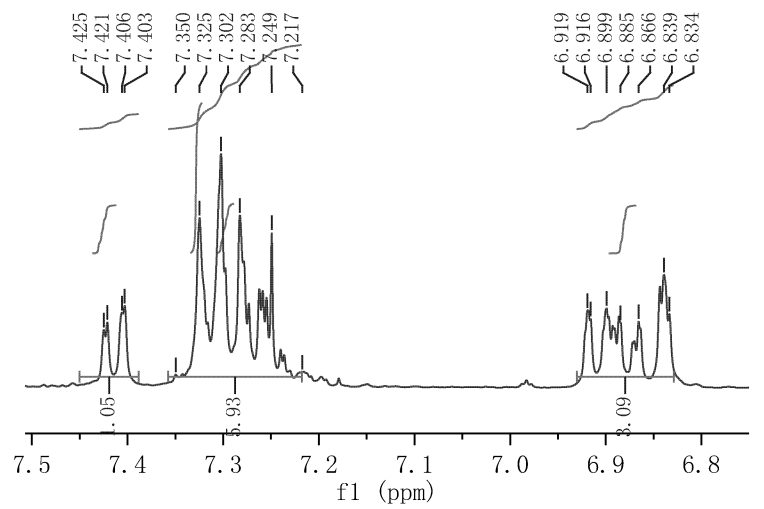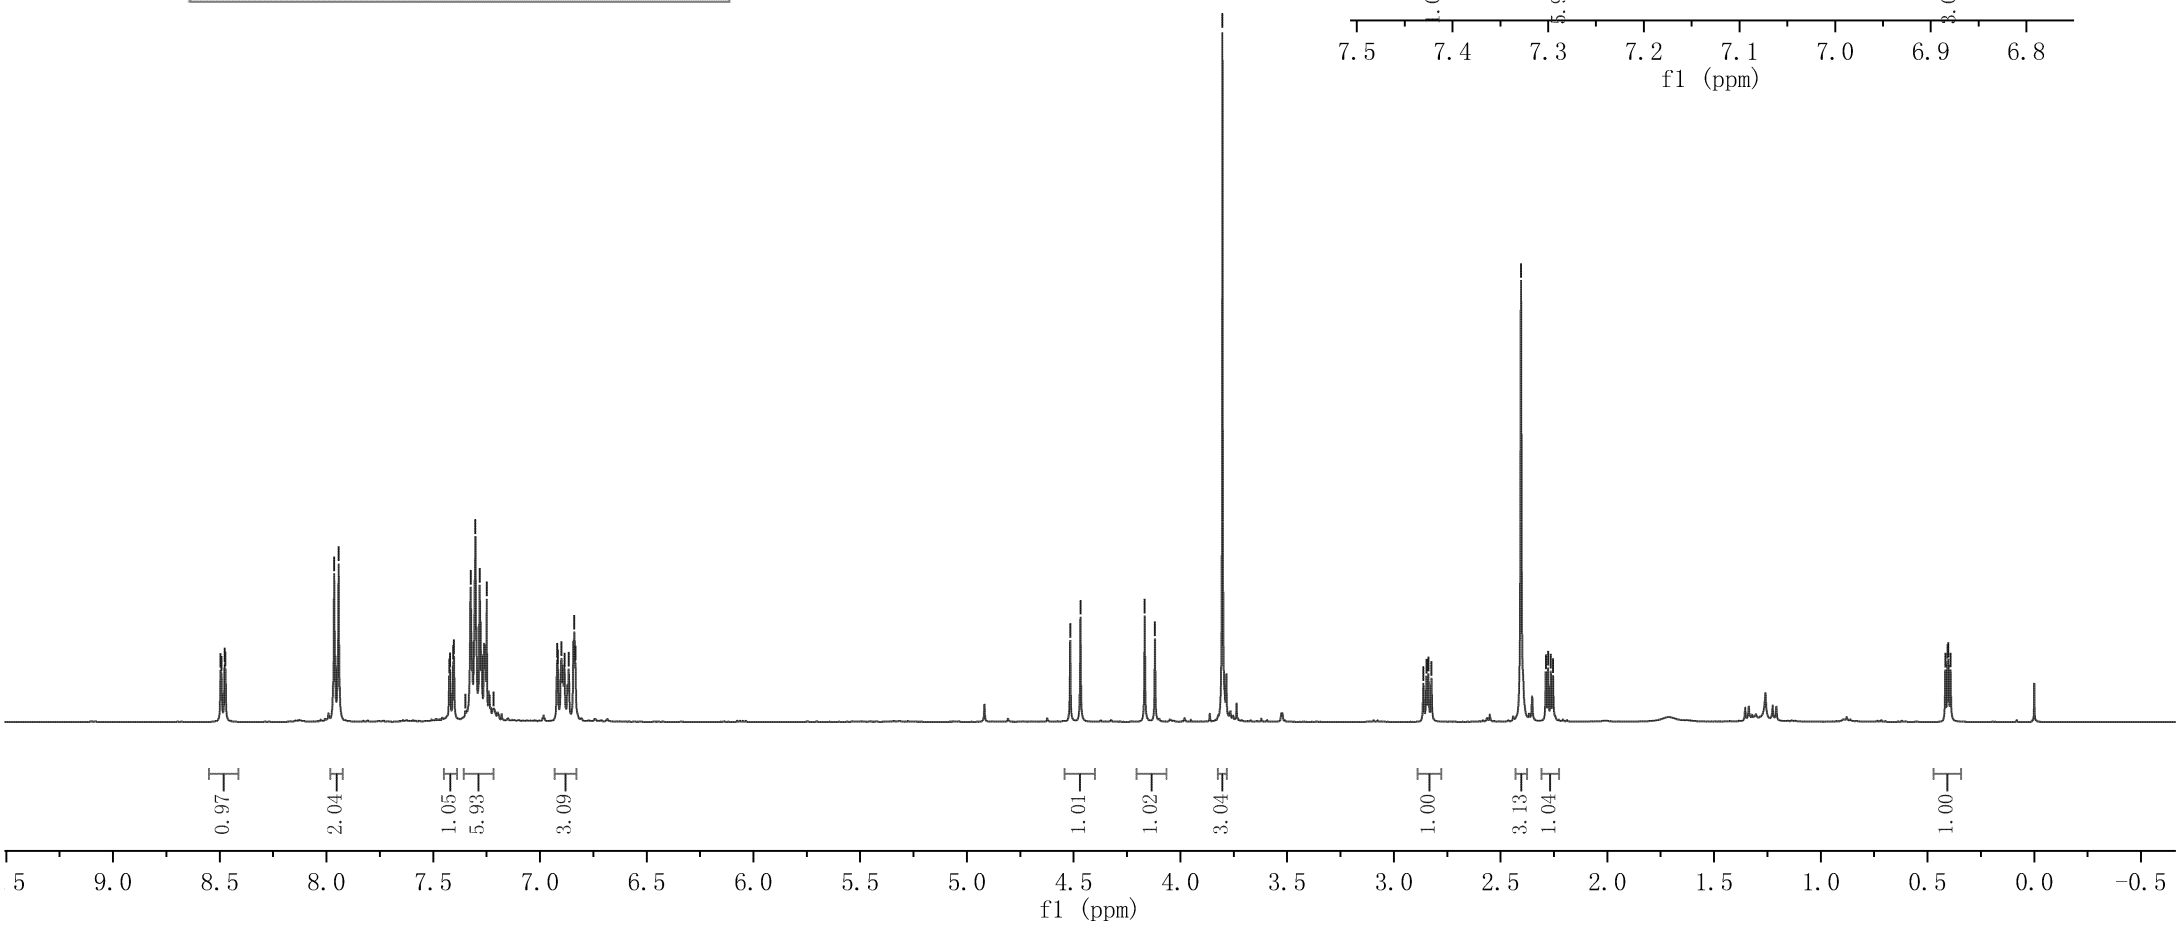

166.96  
 159.95  
 156.45  
 144.91  
 140.92  
 135.53  
 134.86  
 130.09  
 129.66  
 128.53  
 128.02  
 127.65  
 126.49  
 124.41  
 124.18  
 121.78  
 115.38  
 113.43

| Parameter                | Value               |
|--------------------------|---------------------|
| 1 Title                  | hf1-5-197-c-8.18    |
| 2 Origin                 | Bruker BioSpin GmbH |
| 3 Solvent                | CDC13               |
| 4 Temperature            | 296.8               |
| 5 Number of Scans        | 24                  |
| 6 Acquisition Time       | 1.3631              |
| 7 Acquisition Date       | 2018-08-18T20:40:43 |
| 8 Spectrometer Frequency | 100.61              |
| 9 Spectral Width         | 24038.5             |

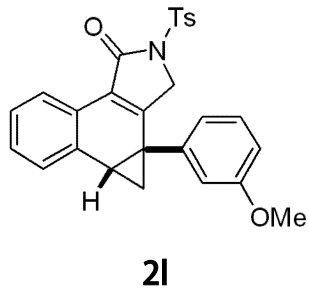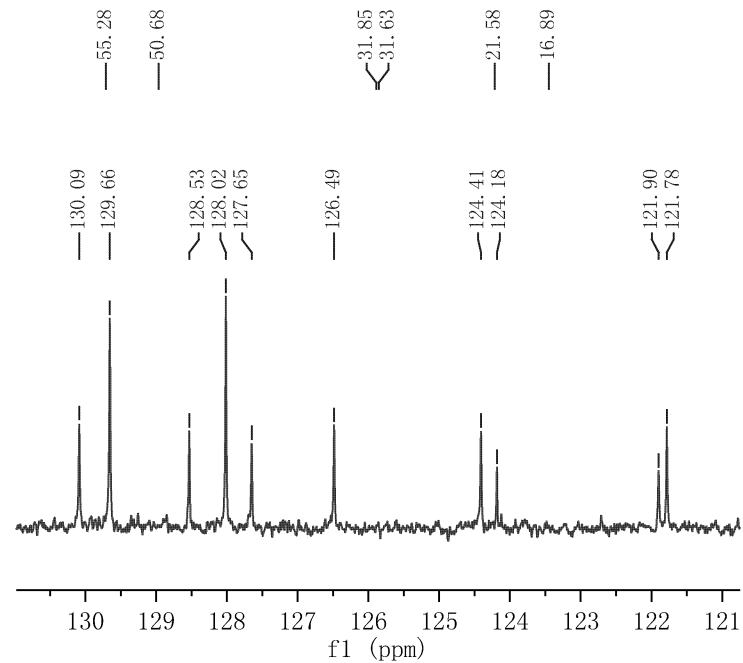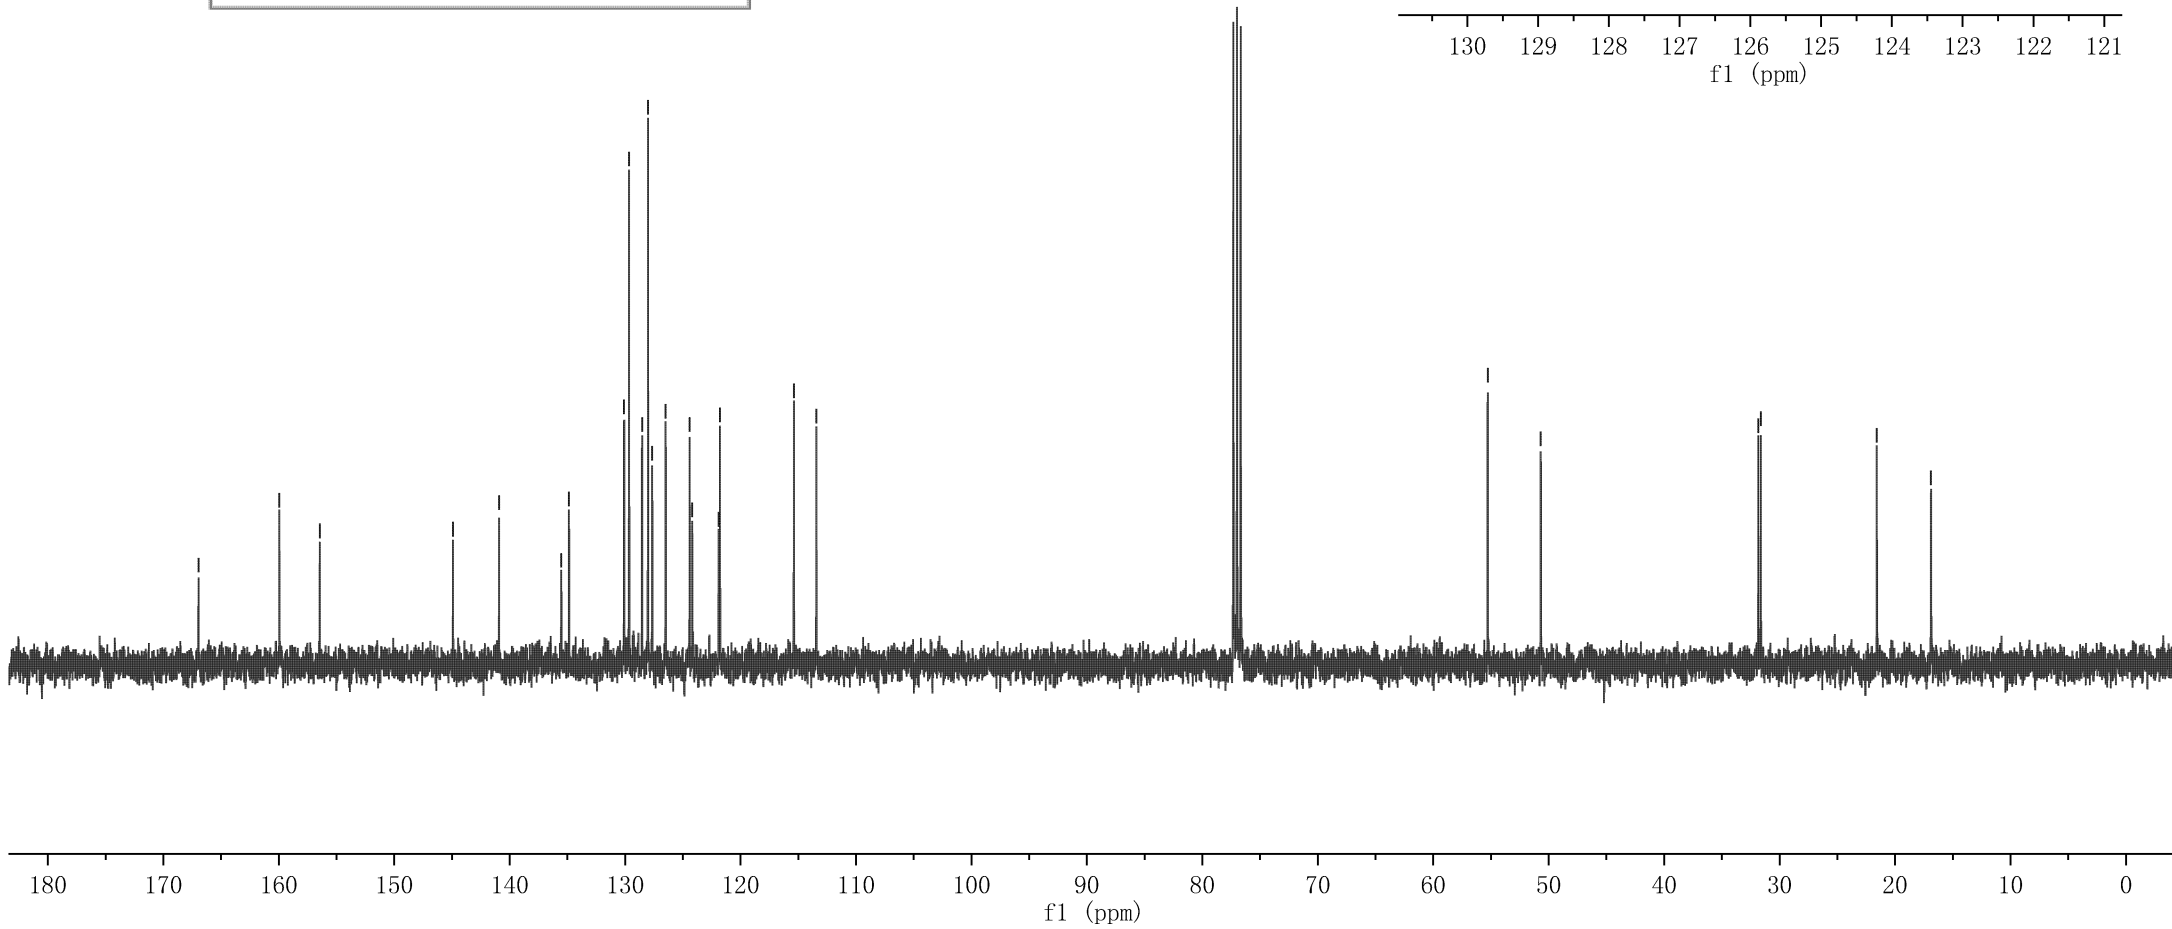

8.476  
8.461  
7.953  
7.936  
7.416  
7.402  
7.347  
7.329  
7.314  
7.298  
6.946  
6.937  
6.943  
6.929  
6.912  
6.896

4.818  
4.578  
4.353  
4.232  
4.067  
4.029  
3.936  
3.808  
3.731  
3.633  
3.513

2.959  
2.756  
2.600  
2.398  
2.269  
2.180  
2.000

0.533  
0.433  
0.322

| Parameter                | Value               |
|--------------------------|---------------------|
| 1 Title                  | HFL-15-112-H        |
| 2 Origin                 | Bruker BioSpin GmbH |
| 3 Solvent                | CDC13               |
| 4 Temperature            | 298.4               |
| 5 Number of Scans        | 9                   |
| 6 Acquisition Time       | 3.1719              |
| 7 Acquisition Date       | 2020-09-03T13:48:46 |
| 8 Spectrometer Frequency | 500.17              |
| 9 Spectral Width         | 10330.6             |

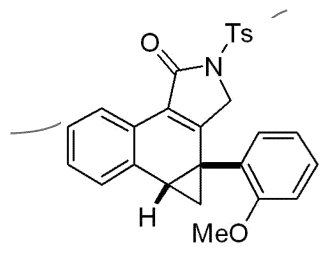

**2m**

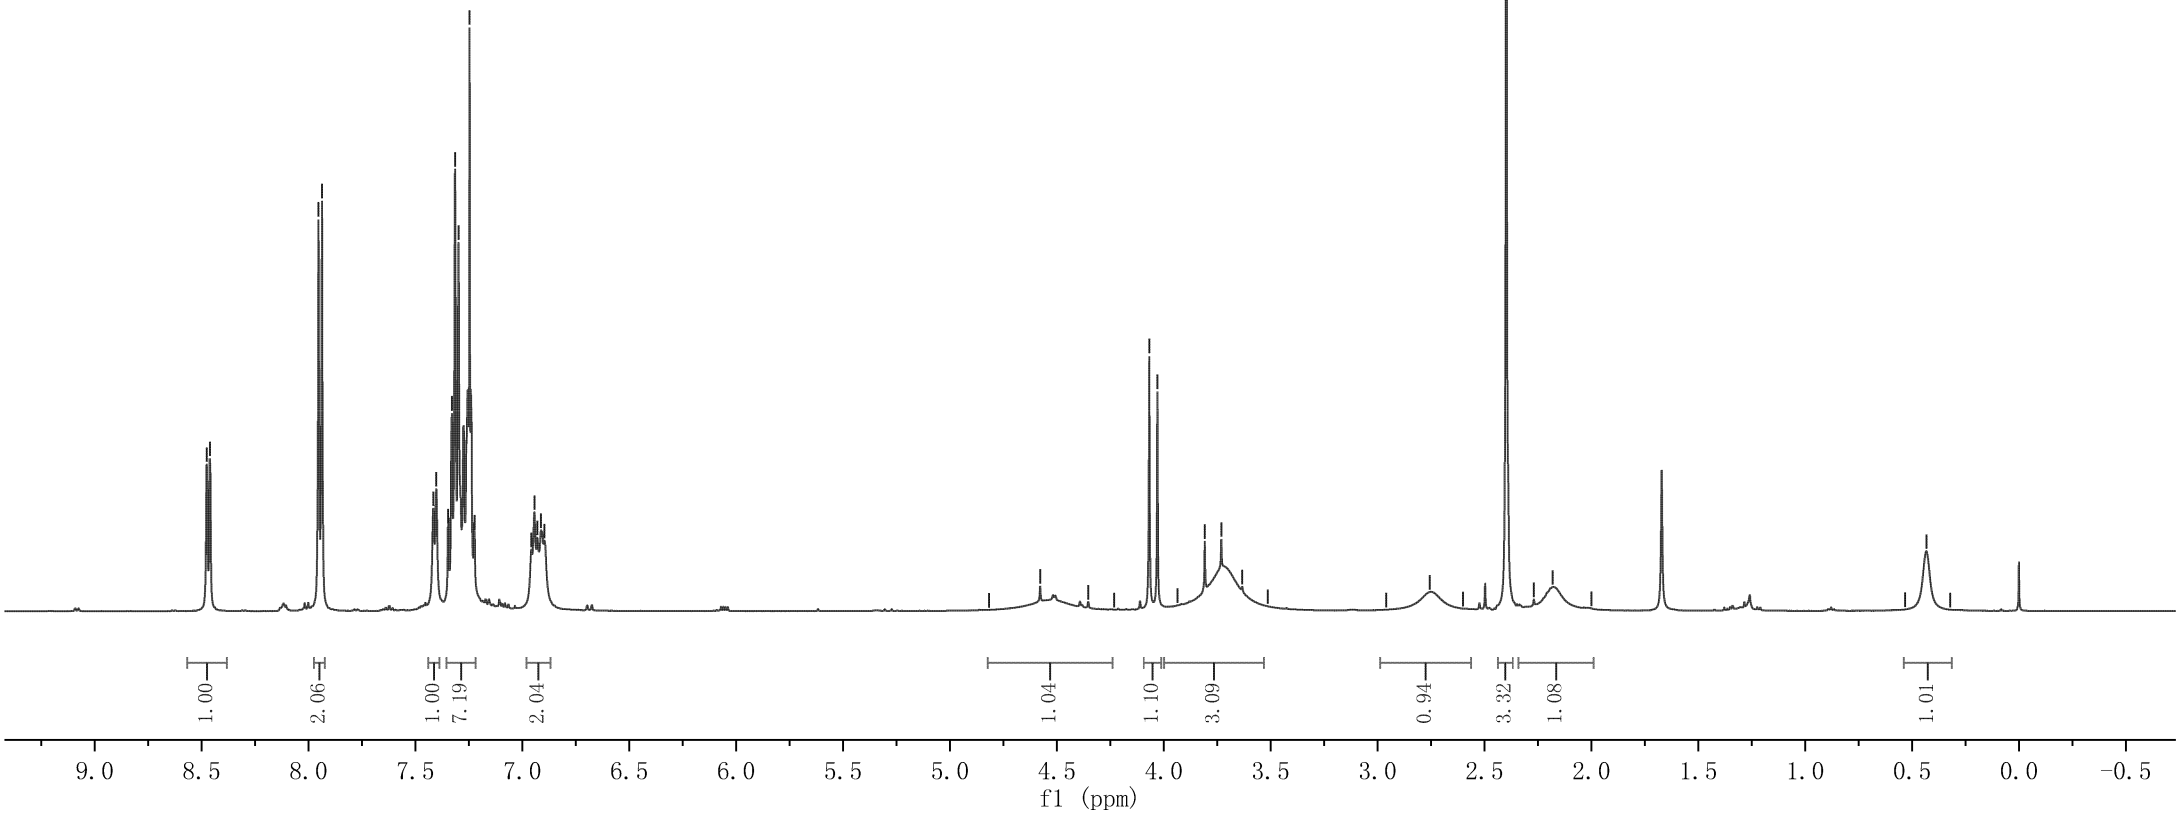

167.29  
 158.66  
 158.09  
 144.77  
 135.66  
 135.50  
 129.71  
 129.59  
 128.13  
 127.51  
 127.96  
 126.20  
 124.40  
 124.22  
 120.91  
 120.64  
 110.83

77.25  
 77.00  
 76.75  
 55.40  
 50.66  
 31.69  
 28.24  
 21.56

| Parameter                | Value               |
|--------------------------|---------------------|
| 1 Title                  | HFL-15-112-C        |
| 2 Origin                 | Bruker BioSpin GmbH |
| 3 Solvent                | CDC13               |
| 4 Temperature            | 298.7               |
| 5 Number of Scans        | 187                 |
| 6 Acquisition Time       | 1.1010              |
| 7 Acquisition Date       | 2020-09-03T13:52:56 |
| 8 Spectrometer Frequency | 125.77              |
| 9 Spectral Width         | 29761.9             |

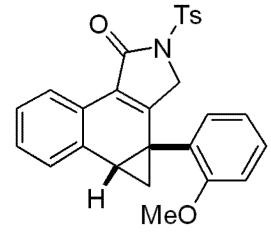

2m

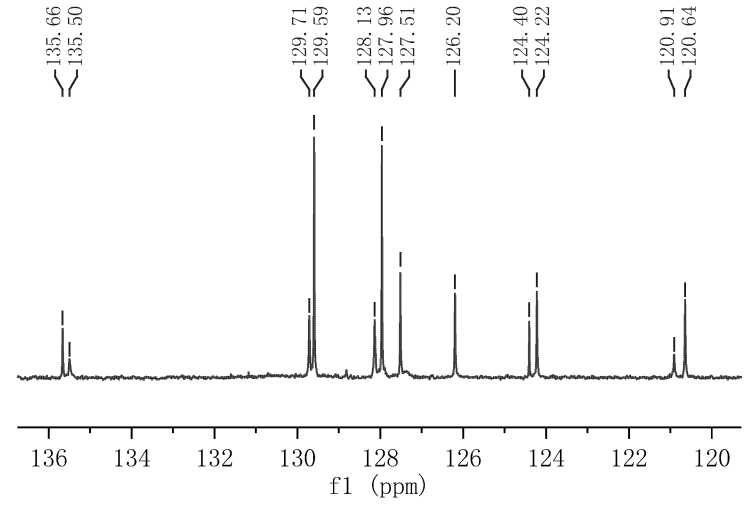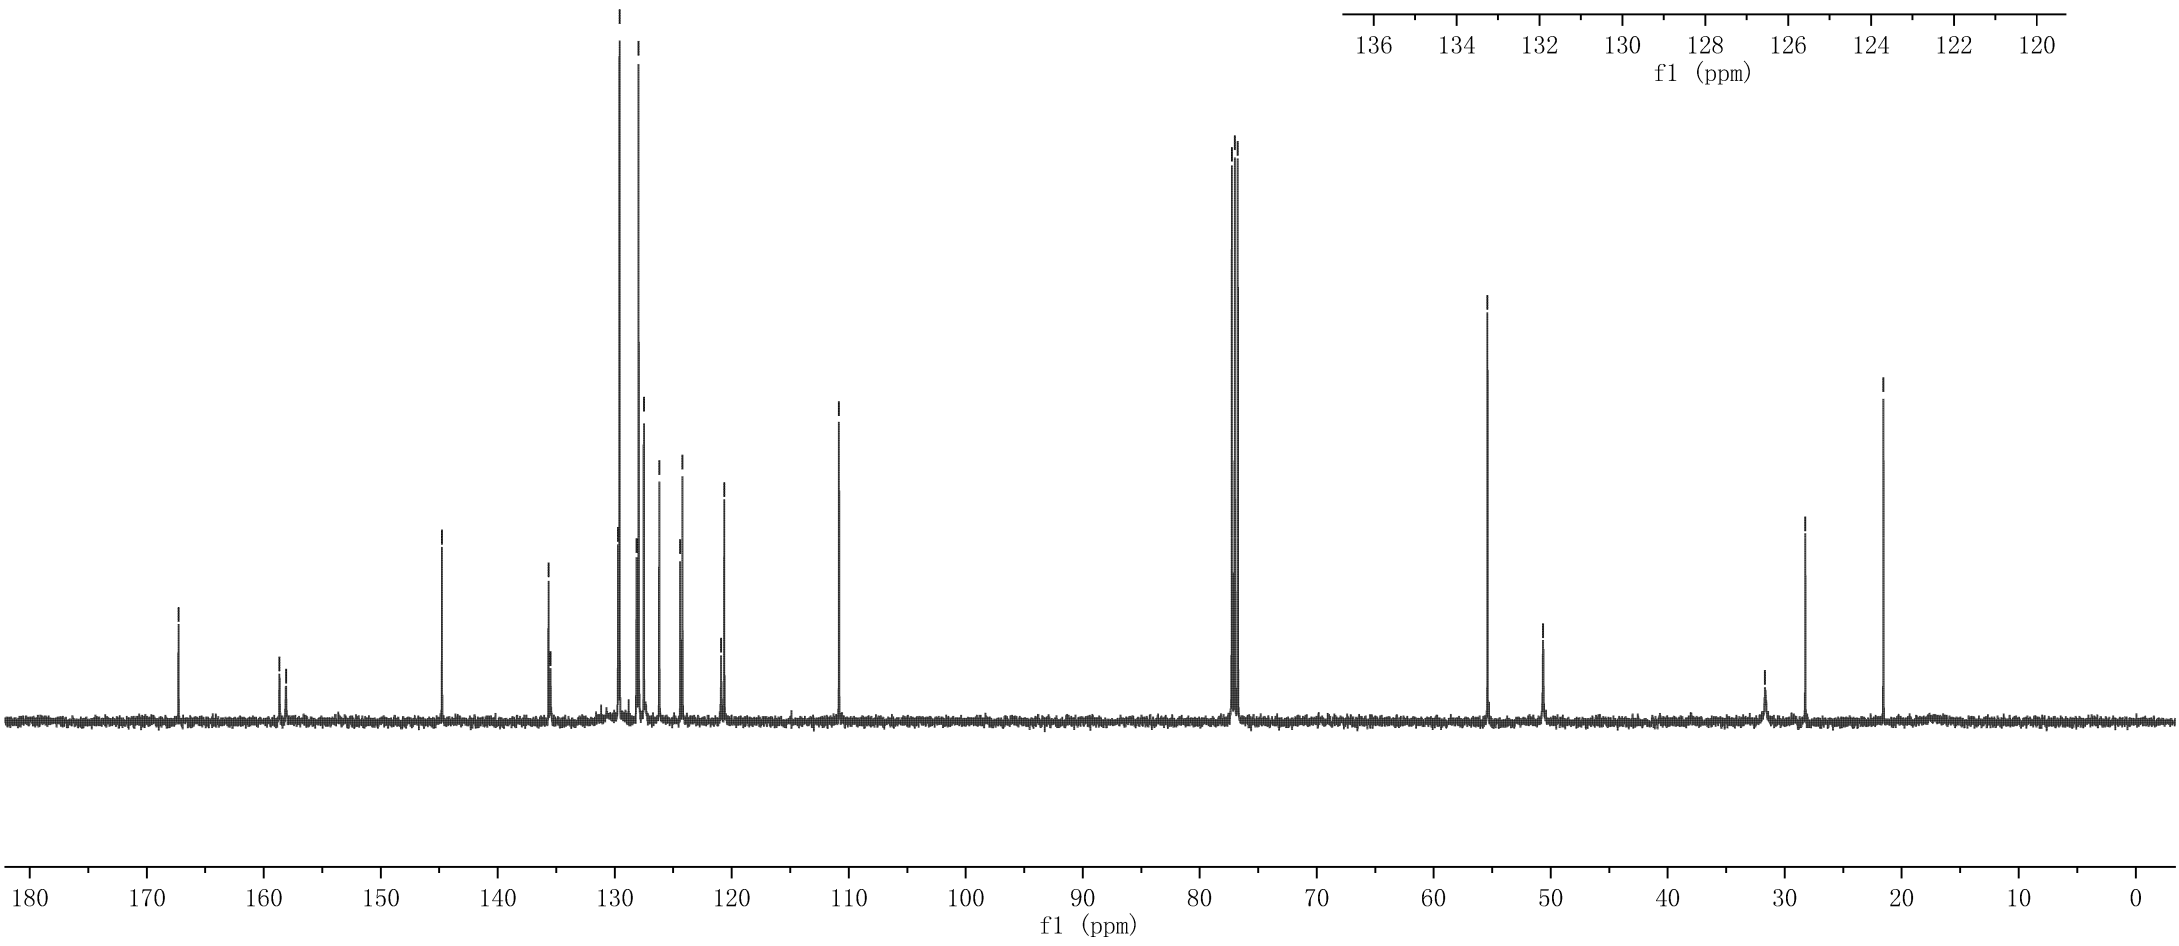

8.488  
8.485  
8.470  
8.466

7.962  
7.941  
7.418  
7.414  
7.399  
7.396  
7.324  
7.304  
7.271  
7.248  
7.229  
7.128  
7.108  
7.073  
7.053  
7.033

4.491  
4.443

4.156  
4.108

2.817  
2.803  
2.793  
2.779  
2.407  
2.276  
2.262  
2.253  
2.243

0.391  
0.381  
0.377  
0.367

| Parameter                | Value               |
|--------------------------|---------------------|
| 1 Title                  | hfl-5-172-H         |
| 2 Origin                 | Bruker BioSpin GmbH |
| 3 Solvent                | CDCl3               |
| 4 Temperature            | 300.0               |
| 5 Number of Scans        | 9                   |
| 6 Acquisition Time       | 3.9846              |
| 7 Acquisition Date       | 2018-07-14T16:50:22 |
| 8 Spectrometer Frequency | 400.13              |
| 9 Spectral Width         | 8223.7              |

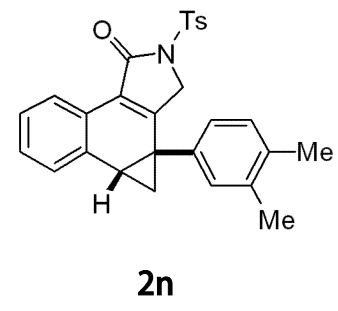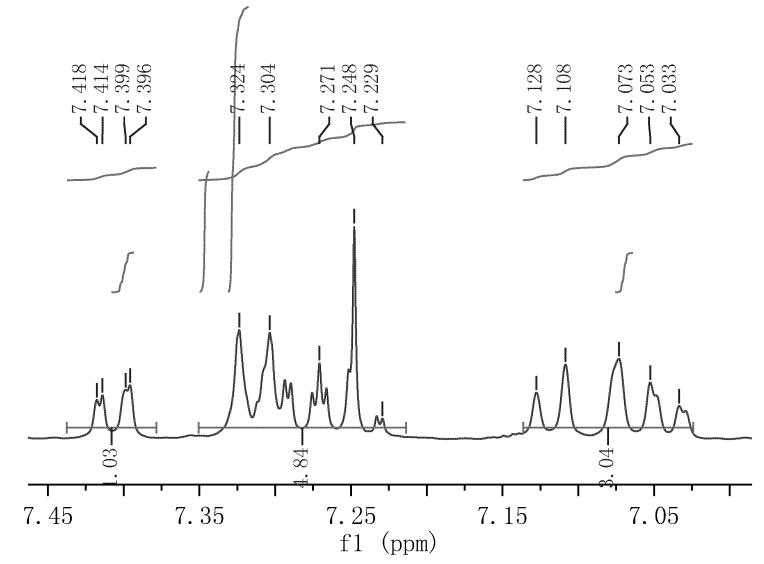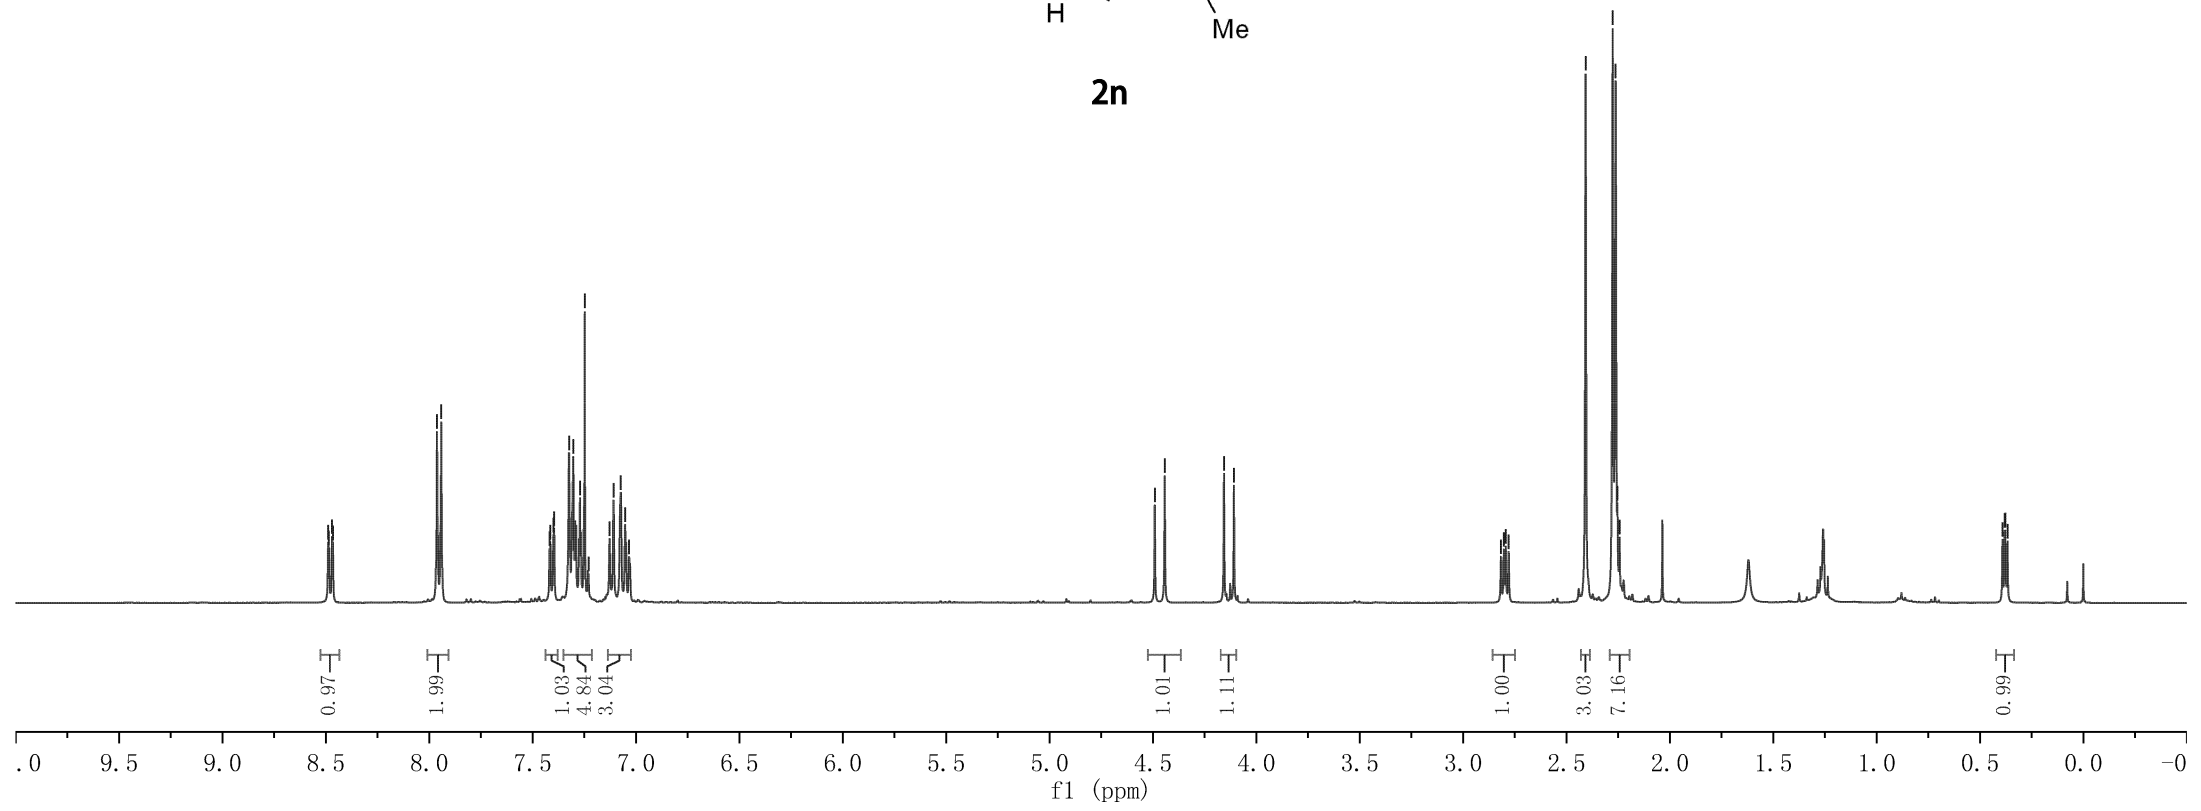

167.08  
157.11  
144.87  
137.31  
137.05  
136.71  
135.66  
135.07  
130.81  
130.18  
129.65  
128.46  
128.06  
127.63  
126.84  
126.42  
124.42  
124.27  
121.73

77.32  
77.00  
76.68

50.83

31.83  
31.65

21.59  
19.72  
19.39  
16.92

| Parameter                | Value               |
|--------------------------|---------------------|
| 1 Title                  | hf1-5-172-C         |
| 2 Origin                 | Bruker BioSpin GmbH |
| 3 Solvent                | CDC13               |
| 4 Temperature            | 300.0               |
| 5 Number of Scans        | 36                  |
| 6 Acquisition Time       | 1.3631              |
| 7 Acquisition Date       | 2018-07-14T16:52:33 |
| 8 Spectrometer Frequency | 100.61              |
| 9 Spectral Width         | 24038.5             |

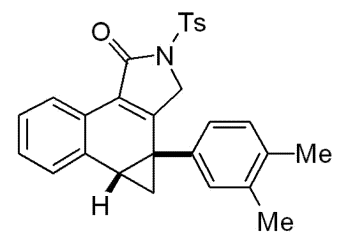

2n

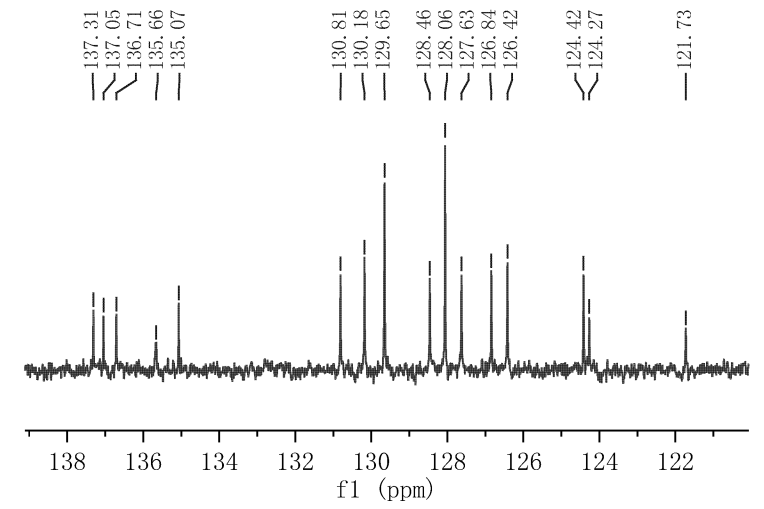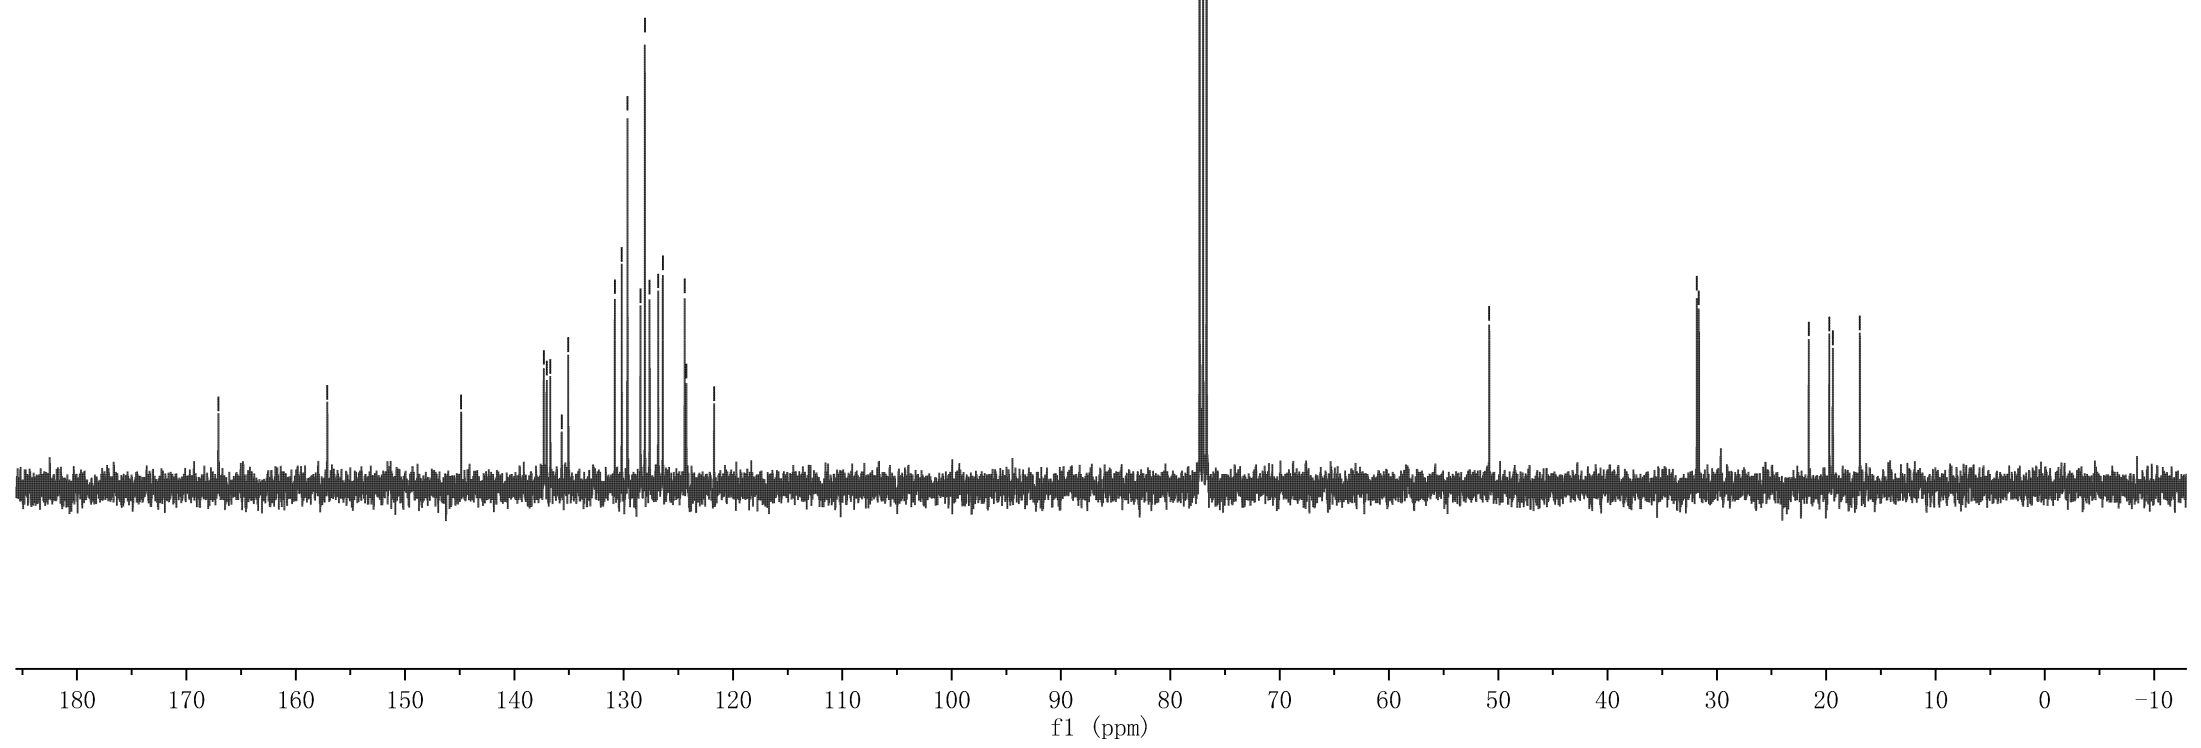

| Parameter                | Value               |
|--------------------------|---------------------|
| 1 Title                  | hf1-6-9.3-h         |
| 2 Origin                 | Bruker BioSpin GmbH |
| 3 Solvent                | CDC13               |
| 4 Temperature            | 297.1               |
| 5 Number of Scans        | 10                  |
| 6 Acquisition Time       | 3.9846              |
| 7 Acquisition Date       | 2018-09-03T10:21:52 |
| 8 Spectrometer Frequency | 400.13              |
| 9 Spectral Width         | 8223.7              |

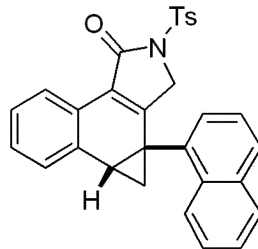

**20**

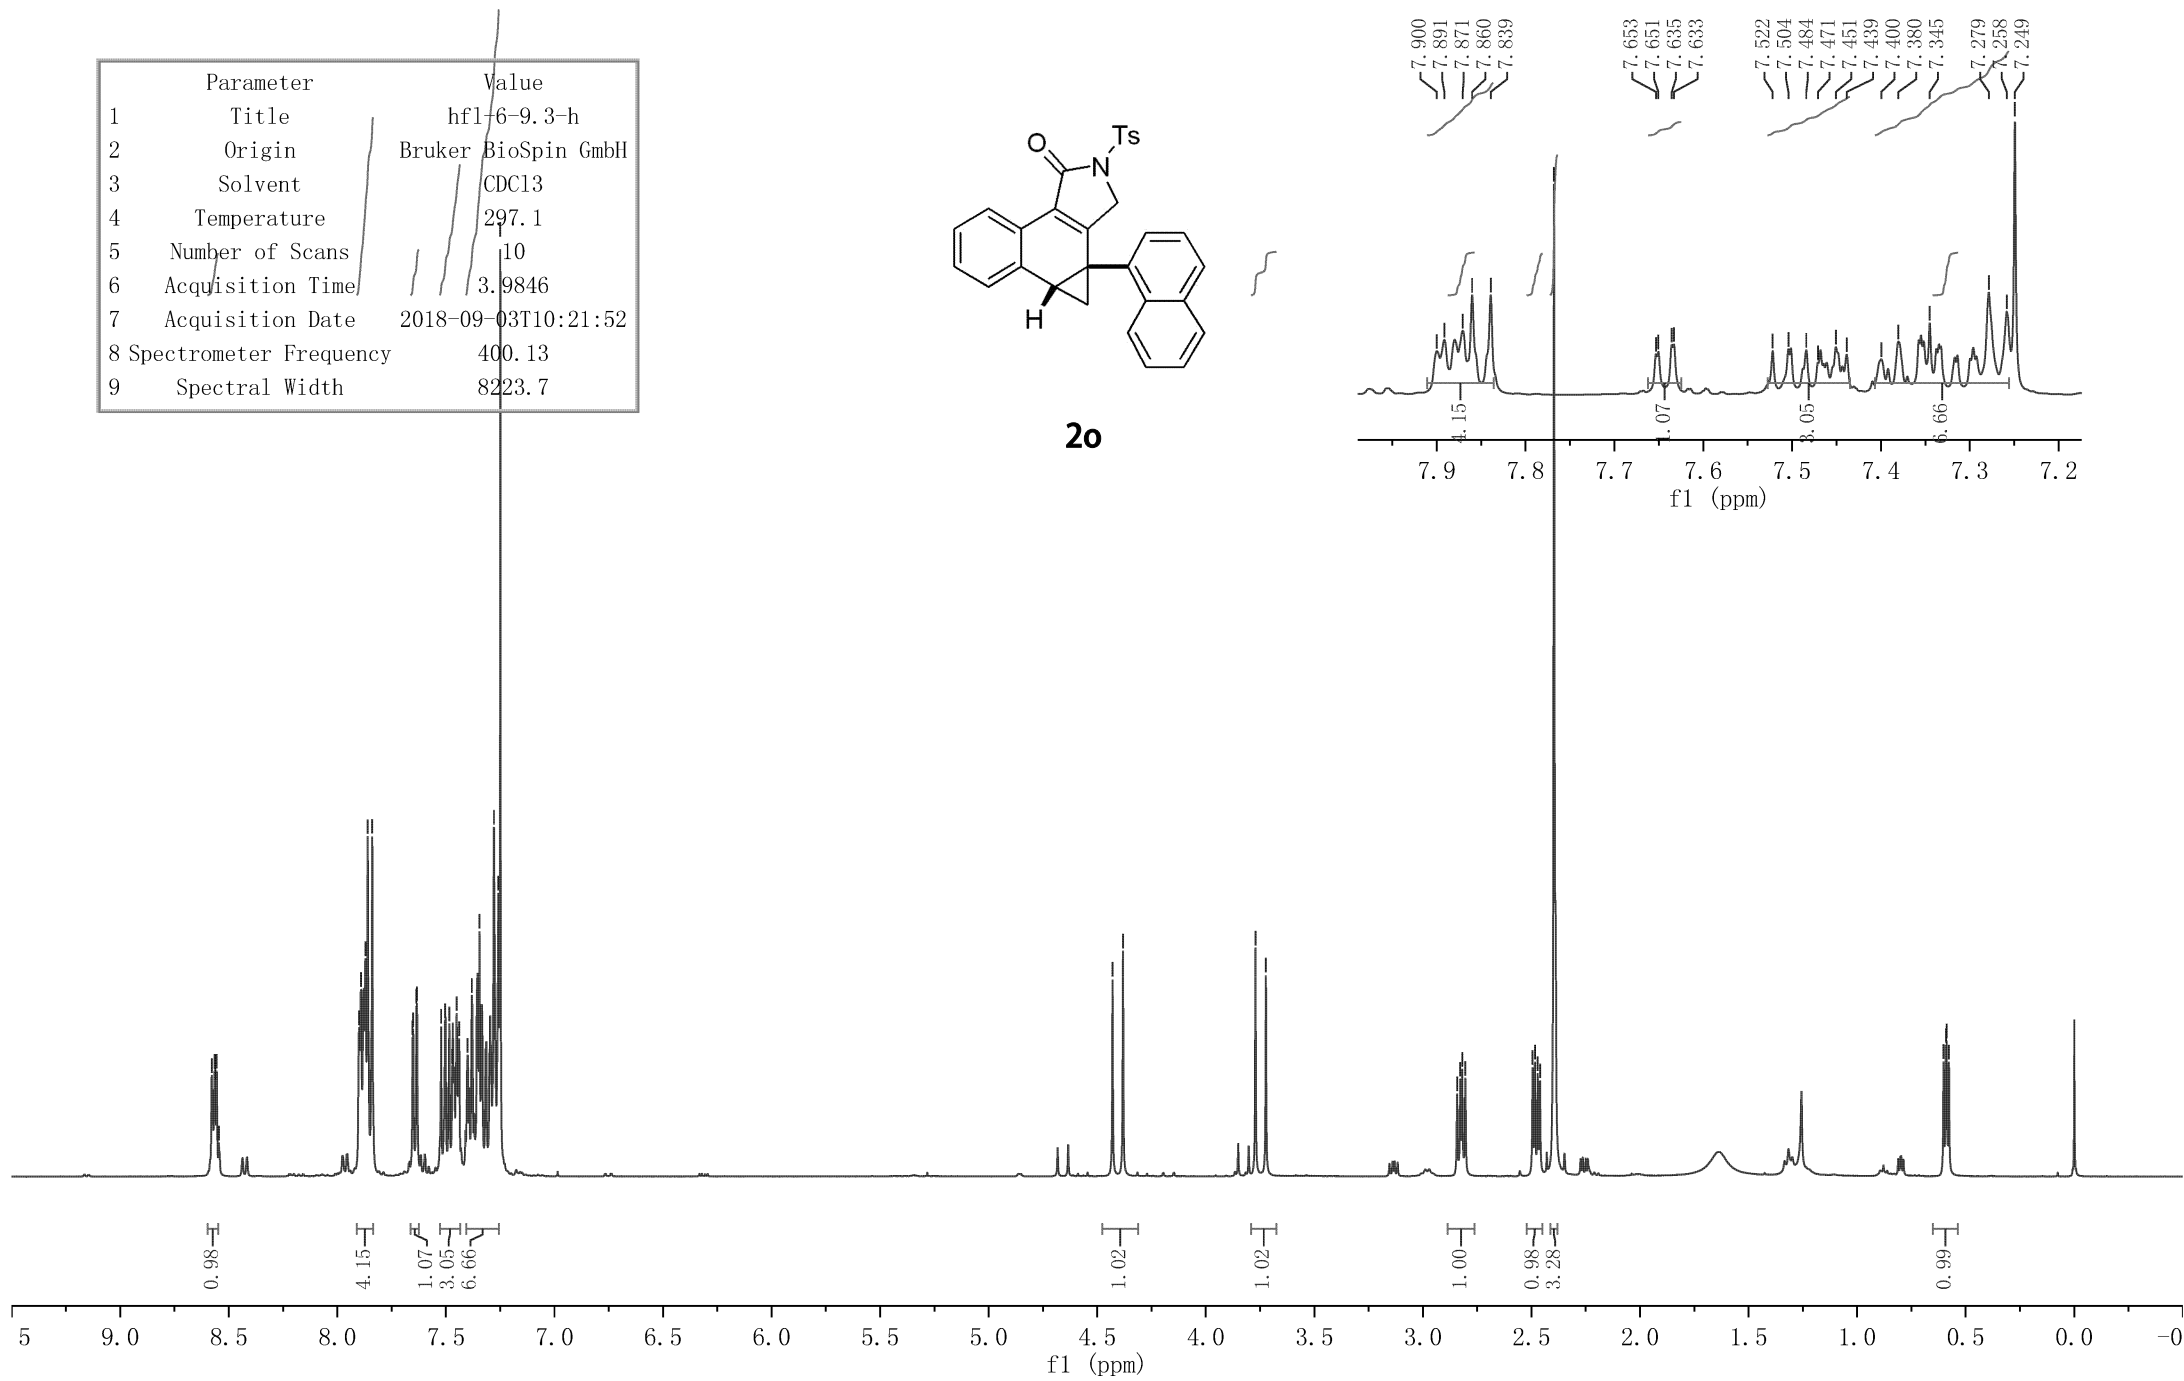

| Parameter                | Value               |
|--------------------------|---------------------|
| 1 Title                  | hf1-6-9.3-C         |
| 2 Origin                 | Bruker BioSpin GmbH |
| 3 Solvent                | CDCl3               |
| 4 Temperature            | 297.2               |
| 5 Number of Scans        | 60                  |
| 6 Acquisition Time       | 1.3631              |
| 7 Acquisition Date       | 2018-09-03T10:25:02 |
| 8 Spectrometer Frequency | 100.61              |
| 9 Spectral Width         | 24038.5             |

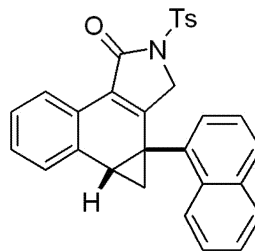

**20**

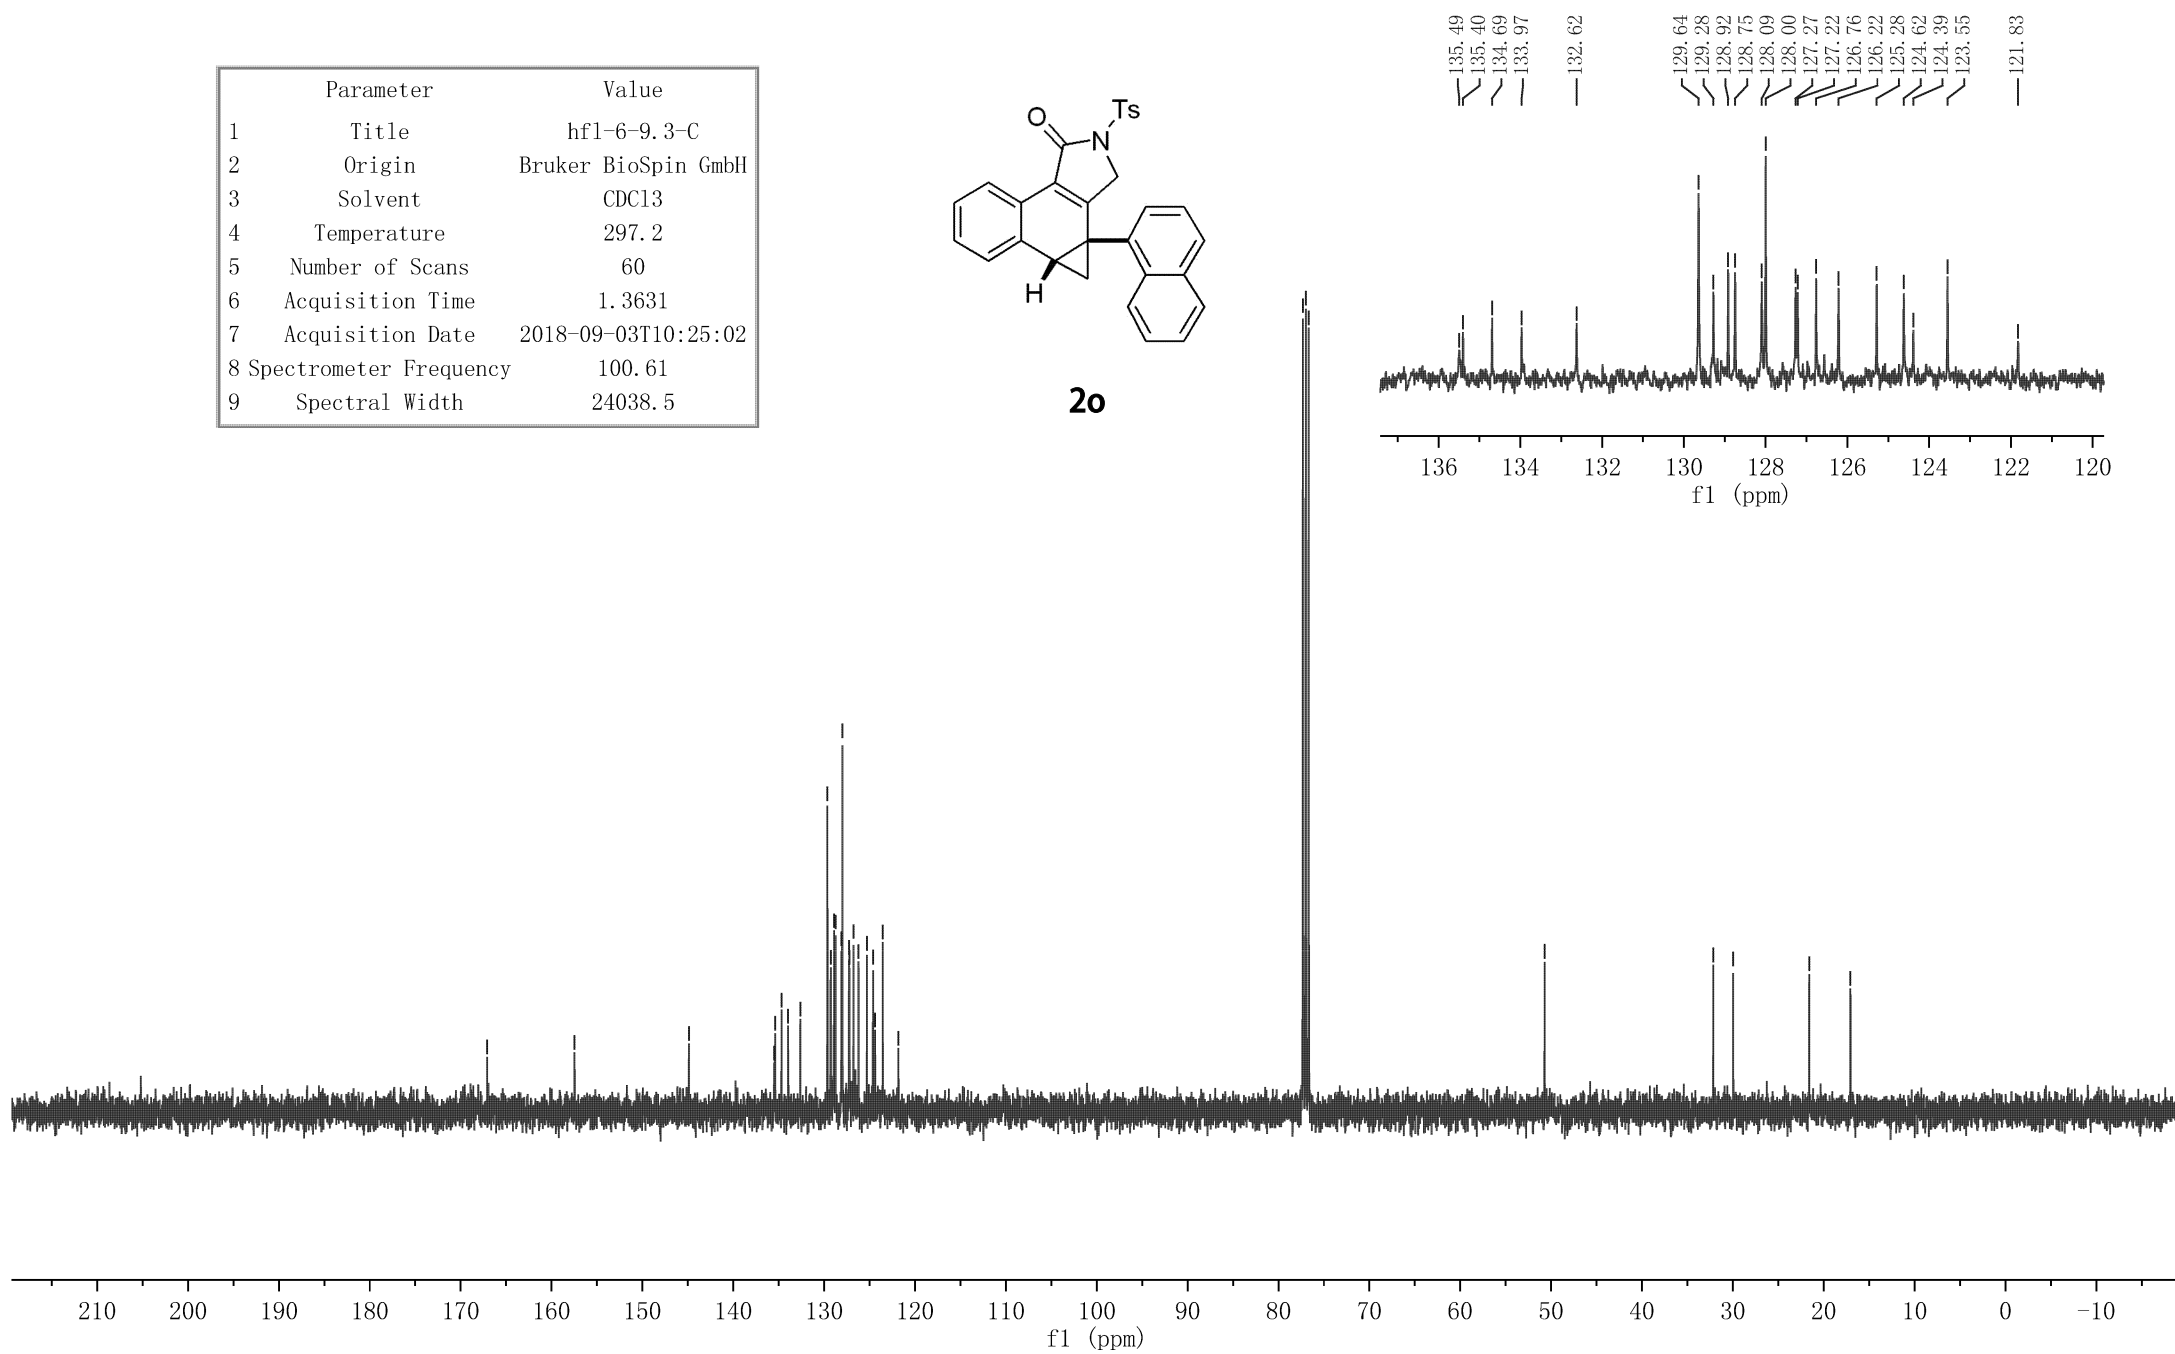



8.501  
8.483  
8.479

7.982  
7.961

7.406  
7.403  
7.340  
7.320  
7.290  
7.272  
7.256  
7.013  
7.008  
7.005  
6.993  
6.984

4.594  
4.546  
4.379  
4.330

2.971  
2.957  
2.948  
2.933

2.417  
2.381  
2.371  
2.358  
2.347

0.527  
0.517  
0.513  
0.502

| Parameter                | Value               |
|--------------------------|---------------------|
| 1 Title                  | HFL-5-142-7.10-H    |
| 2 Origin                 | Bruker BioSpin GmbH |
| 3 Solvent                | CDC13               |
| 4 Temperature            | 299.1               |
| 5 Number of Scans        | 8                   |
| 6 Acquisition Time       | 3.9846              |
| 7 Acquisition Date       | 2018-07-10T21:55:24 |
| 8 Spectrometer Frequency | 400.13              |
| 9 Spectral Width         | 8223.7              |

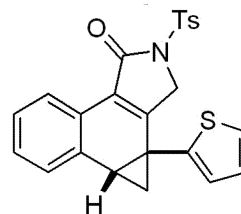

2p

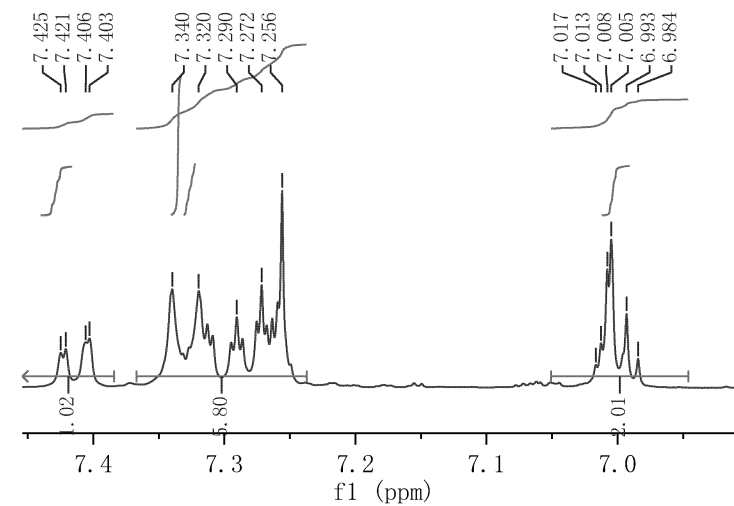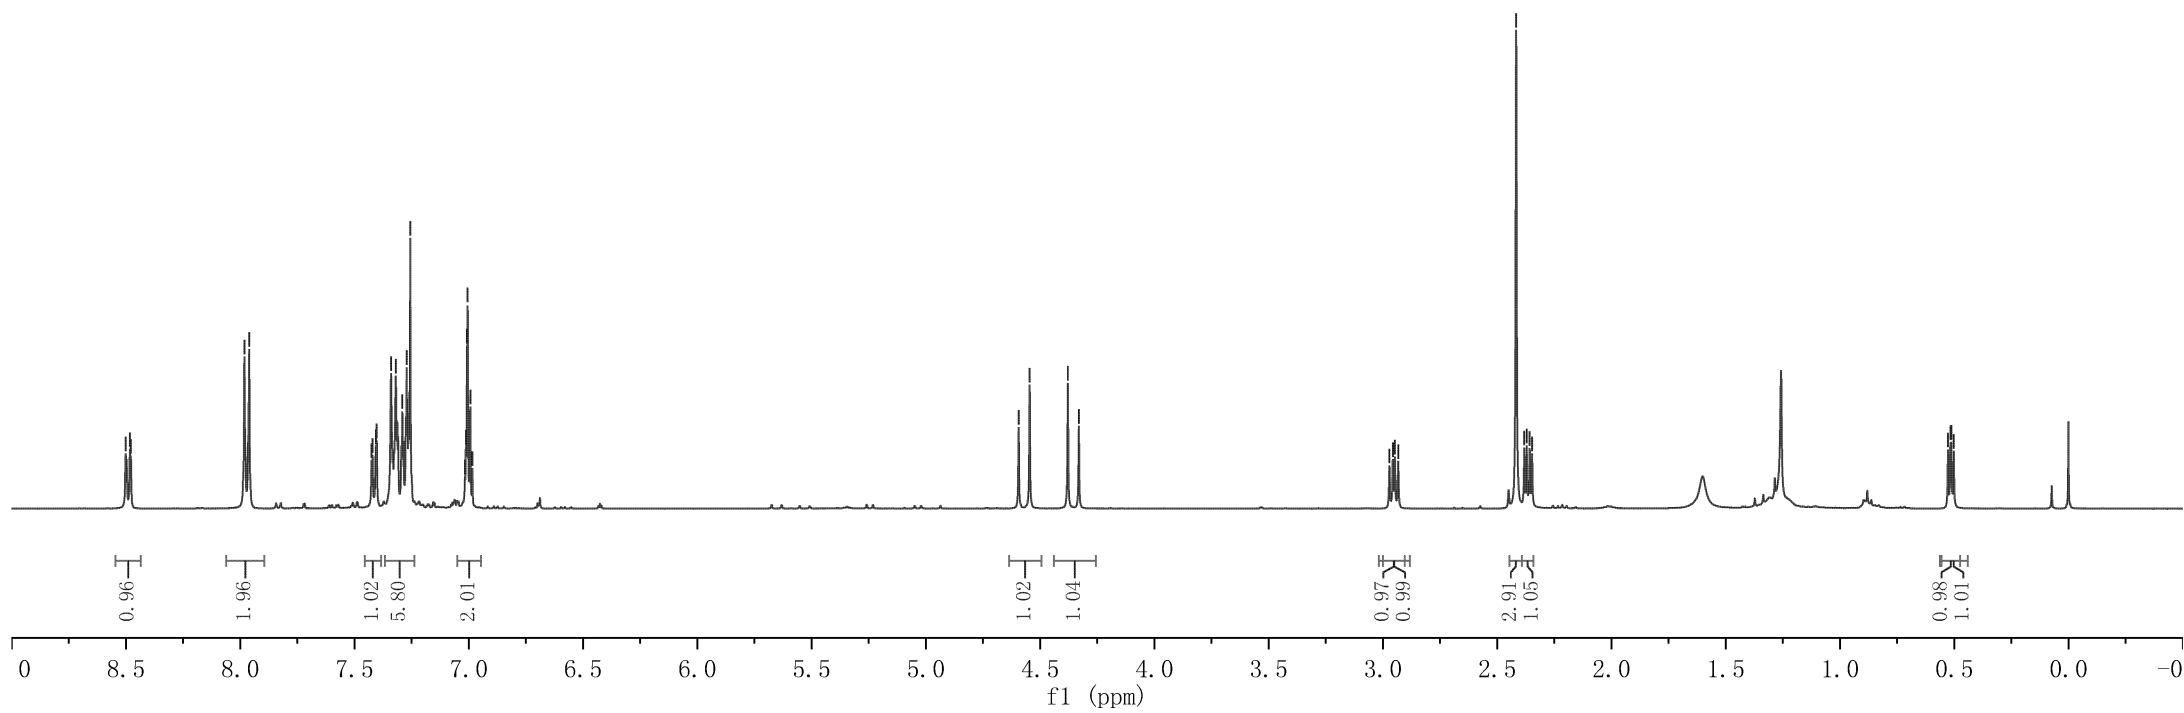

| Parameter                | Value               |
|--------------------------|---------------------|
| 1 Title                  | HFL-5-142-7. 10-C   |
| 2 Origin                 | Bruker BioSpin GmbH |
| 3 Solvent                | CDC13               |
| 4 Temperature            | 299.2               |
| 5 Number of Scans        | 165                 |
| 6 Acquisition Time       | 1.3631              |
| 7 Acquisition Date       | 2018-07-10T21:57:47 |
| 8 Spectrometer Frequency | 100.61              |
| 9 Spectral Width         | 24038.5             |

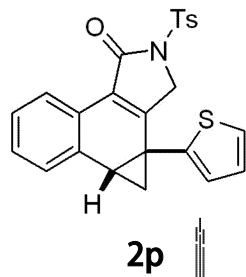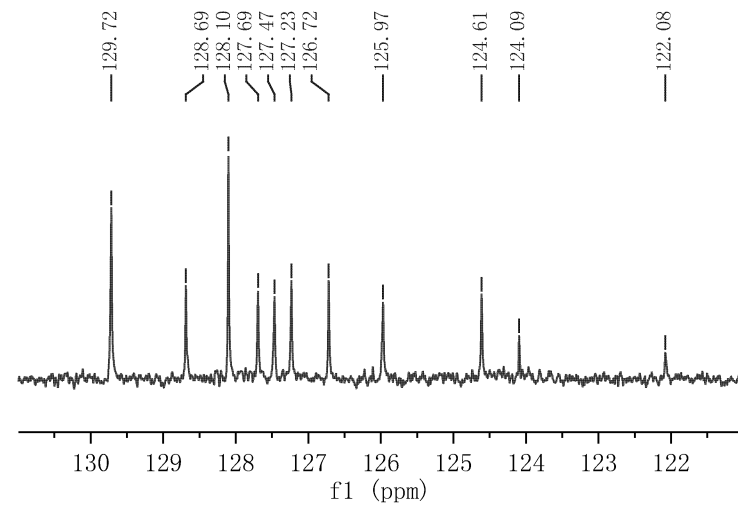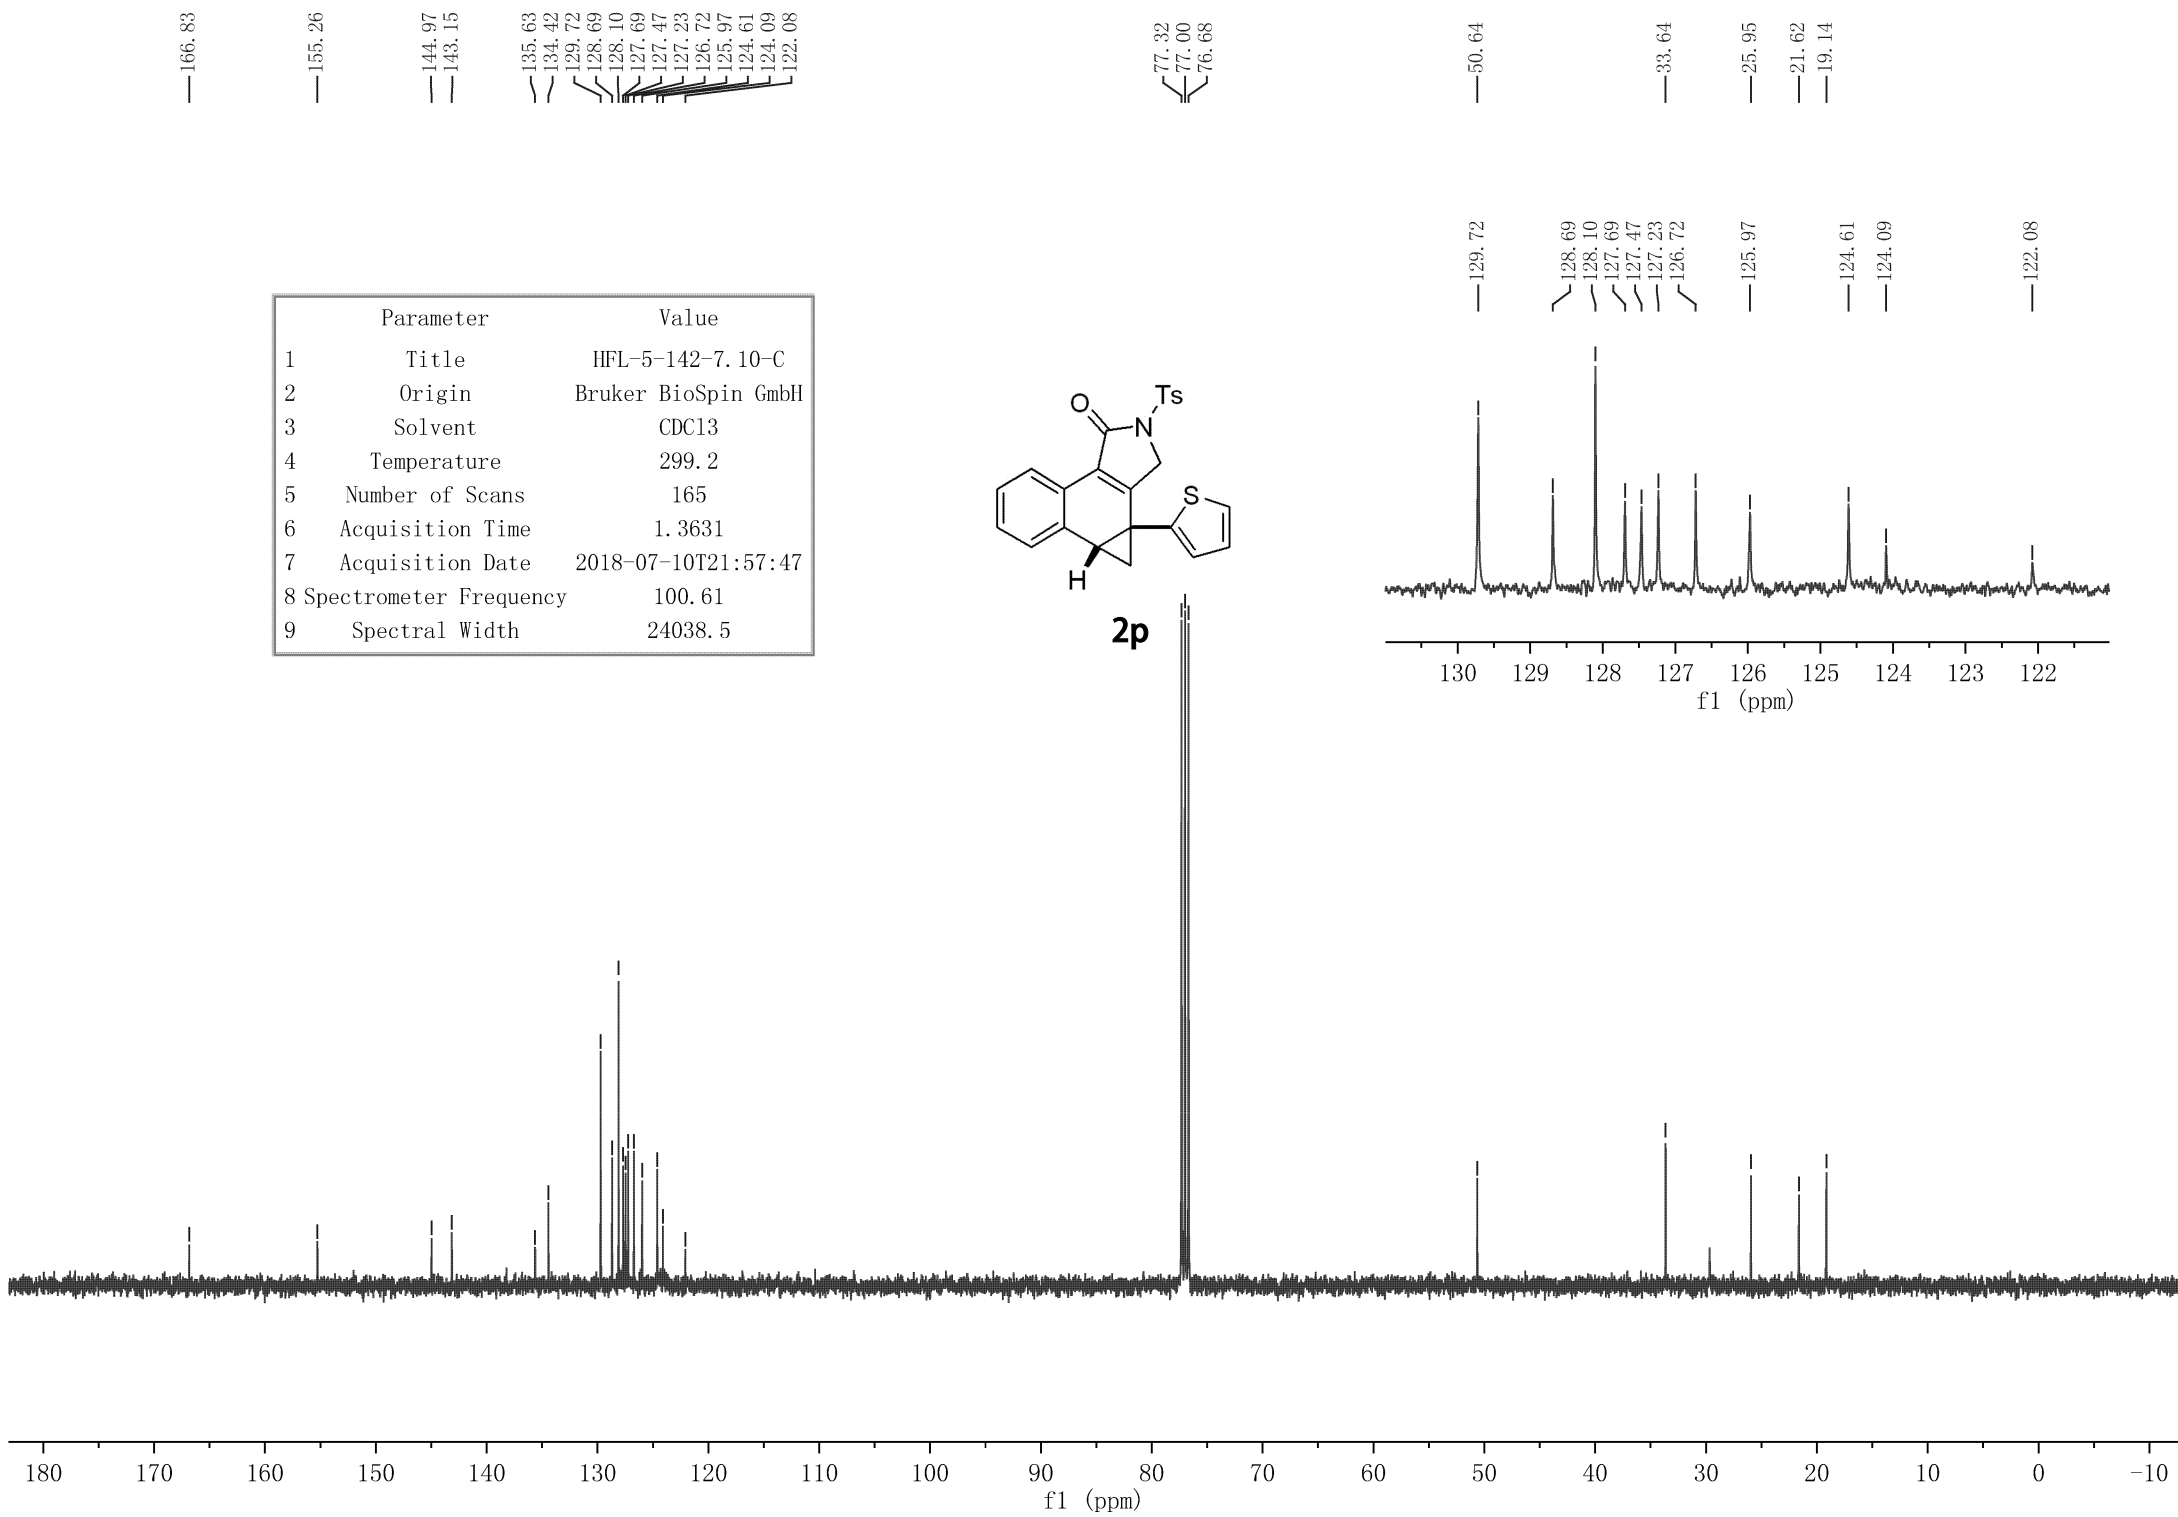

8.325  
 7.962  
 7.942  
 7.391  
 7.384  
 7.370  
 7.351  
 7.326  
 7.321  
 7.310  
 7.291  
 7.251  
 7.129  
 7.111

4.490  
 4.442  
 4.136  
 4.088

2.834  
 2.819  
 2.811  
 2.796  
 2.412  
 2.340  
 2.266  
 2.256  
 2.243  
 2.232

0.414  
 0.402  
 0.389

| Parameter                | Value               |
|--------------------------|---------------------|
| 1 Title                  | hf1-5-158-h-7.14    |
| 2 Origin                 | Brüker BioSpin GmbH |
| 3 Solvent                | CDC13               |
| 4 Temperature            | 299.6               |
| 5 Number of Scans        | 7                   |
| 6 Acquisition Time       | 3.9846              |
| 7 Acquisition Date       | 2018-07-14T16:39:24 |
| 8 Spectrometer Frequency | 400.13              |
| 9 Spectral Width         | 8223.7              |

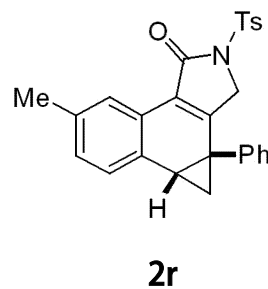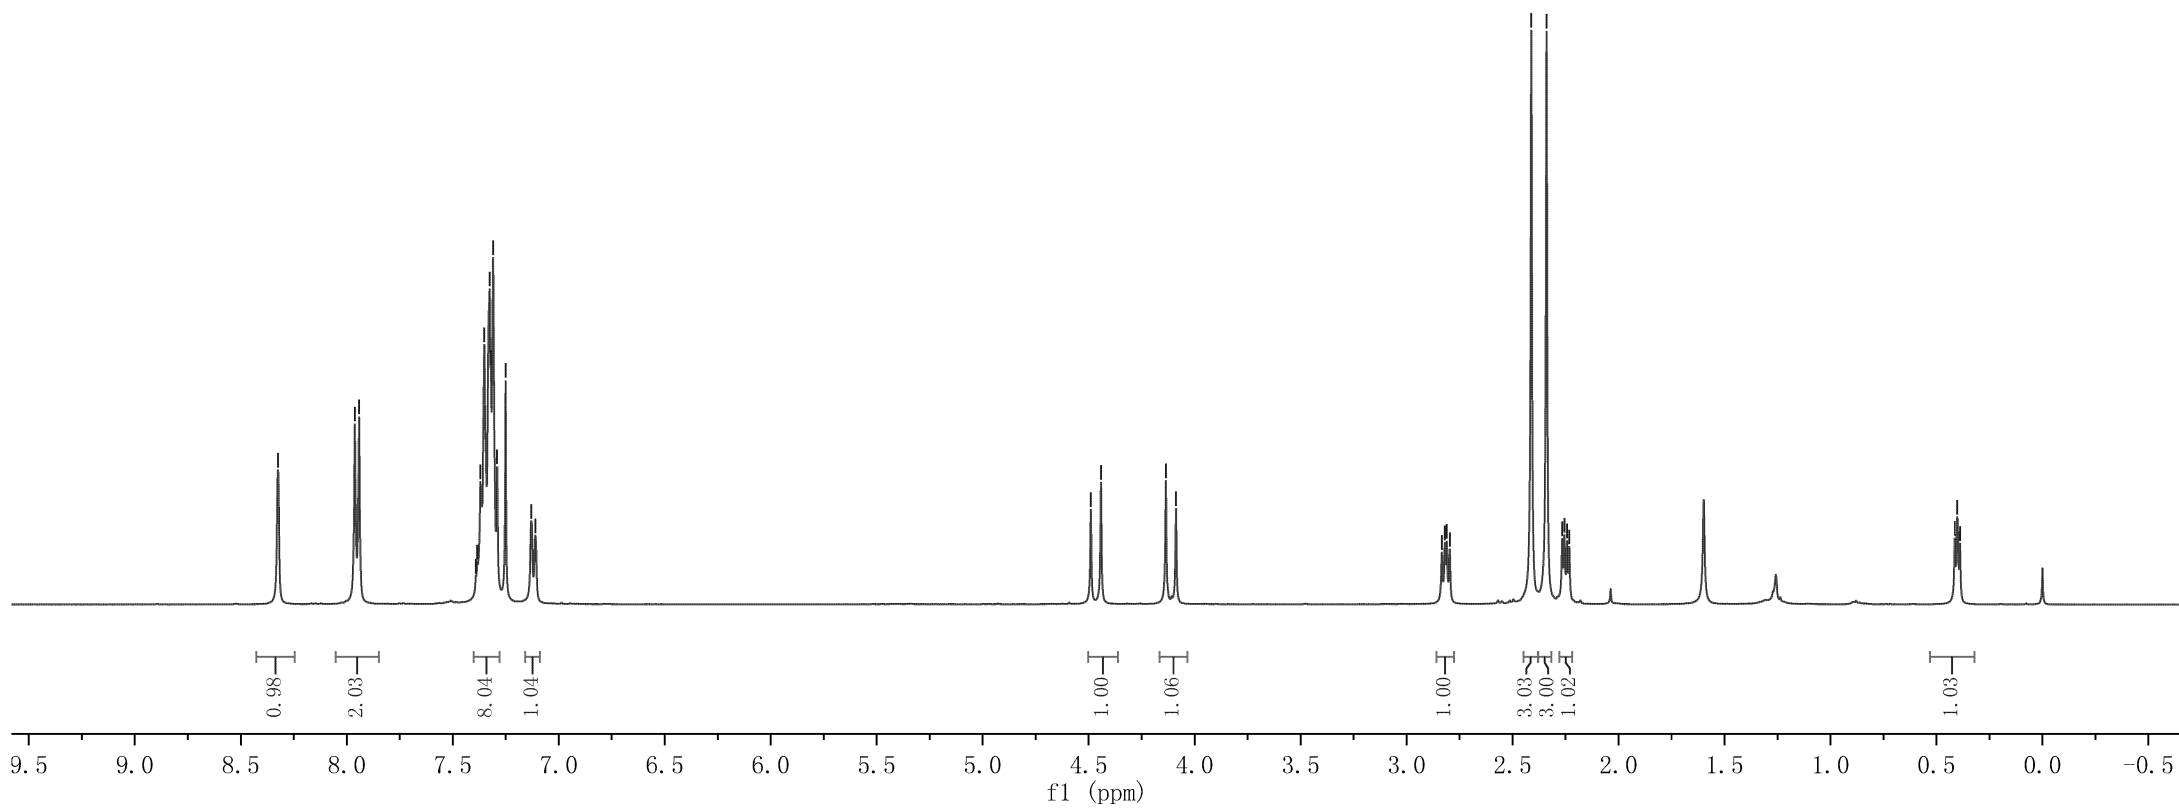

| Parameter                | Value               |
|--------------------------|---------------------|
| 1 Title                  | hf1-5-158-c-7.14    |
| 2 Origin                 | Bruker BioSpin GmbH |
| 3 Solvent                | CDCl3               |
| 4 Temperature            | 299.8               |
| 5 Number of Scans        | 101                 |
| 6 Acquisition Time       | 1.3631              |
| 7 Acquisition Date       | 2018-07-14T16:42:11 |
| 8 Spectrometer Frequency | 100.61              |
| 9 Spectral Width         | 24038.5             |

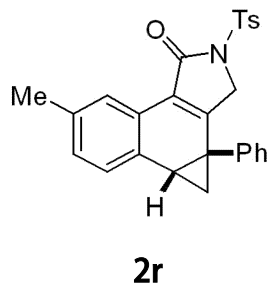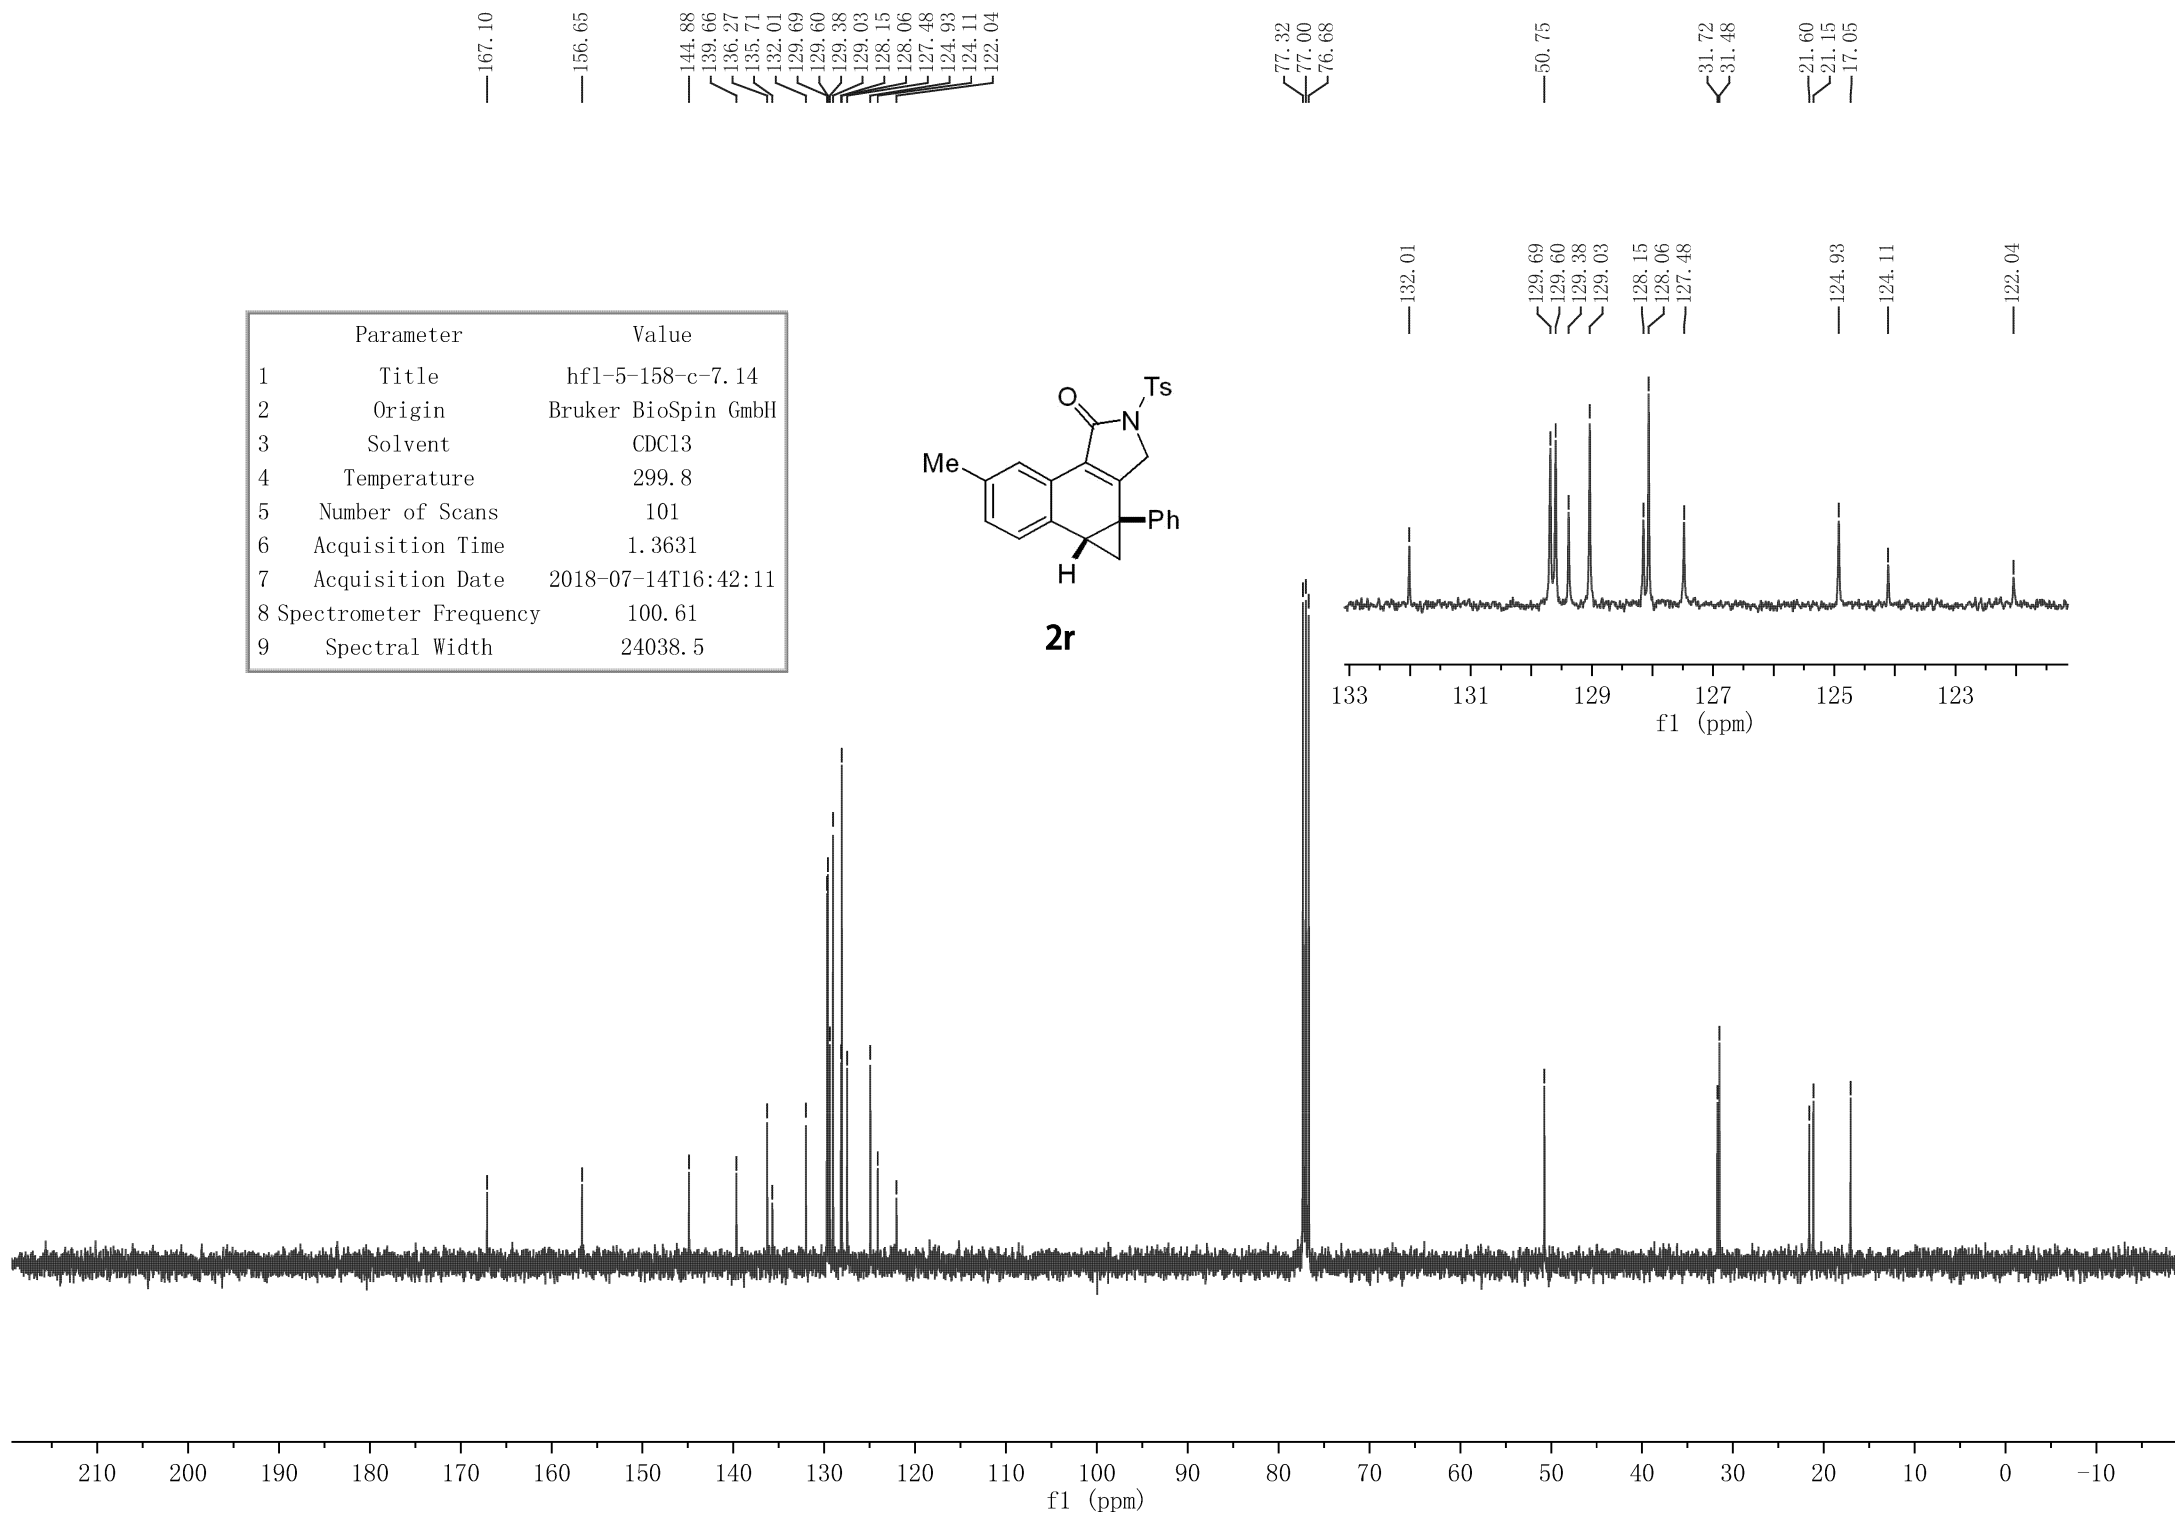

8.114  
8.109  
7.959  
7.943

7.385  
7.358  
7.339  
7.324  
7.302

6.897  
6.891  
6.880  
6.875

4.483  
4.445

4.133  
4.095

3.826

2.833  
2.821  
2.814  
2.803

2.421  
2.254  
2.245  
2.235  
2.227

0.395  
0.386  
0.384  
0.375

| Parameter                | Value               |
|--------------------------|---------------------|
| 1 Title                  | HFL-OME-9.28-HH     |
| 2 Origin                 | Bruker BioSpin GmbH |
| 3 Solvent                | CDC13               |
| 4 Temperature            | 298.1               |
| 5 Number of Scans        | 5                   |
| 6 Acquisition Time       | 3.1719              |
| 7 Acquisition Date       | 2020-09-28T15:36:01 |
| 8 Spectrometer Frequency | 500.17              |
| 9 Spectral Width         | 10330.6             |

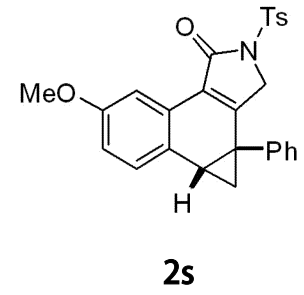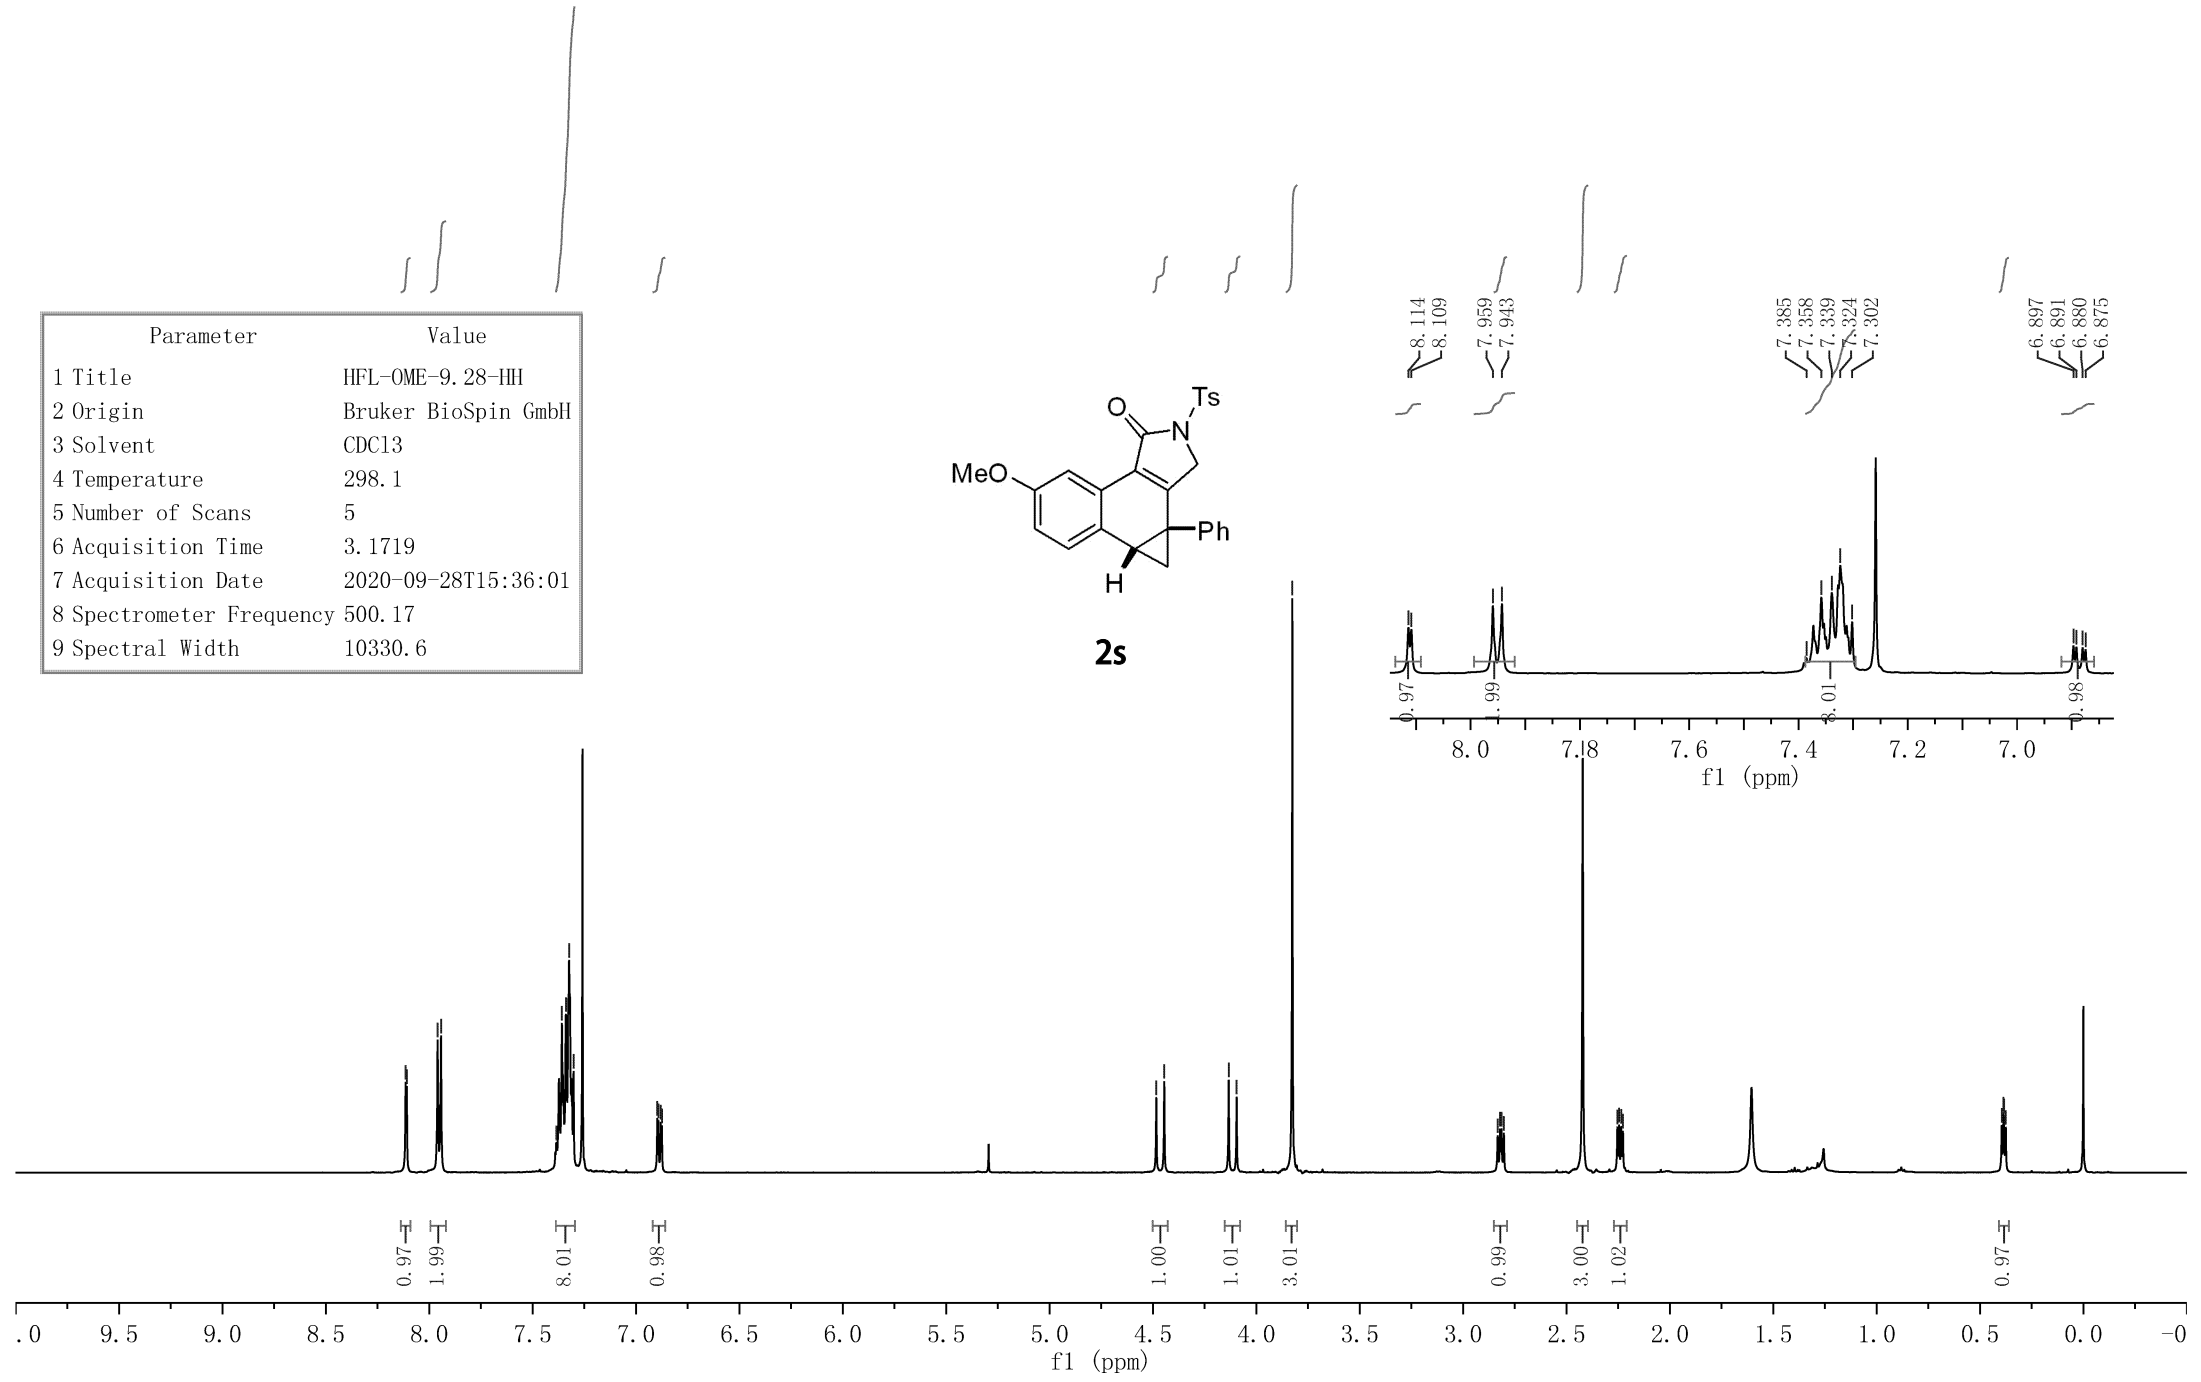

| Parameter                | Value               |
|--------------------------|---------------------|
| 1 Title                  | HFL-OME-9.28-cc     |
| 2 Origin                 | Bruker BioSpin GmbH |
| 3 Solvent                | CDC13               |
| 4 Temperature            | 298.8               |
| 5 Number of Scans        | 86                  |
| 6 Acquisition Time       | 1.1010              |
| 7 Acquisition Date       | 2020-09-28T15:40:51 |
| 8 Spectrometer Frequency | 125.77              |
| 9 Spectral Width         | 29761.9             |

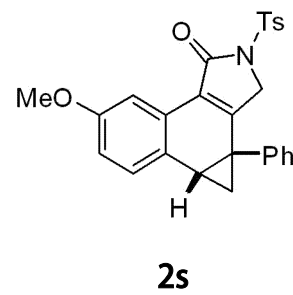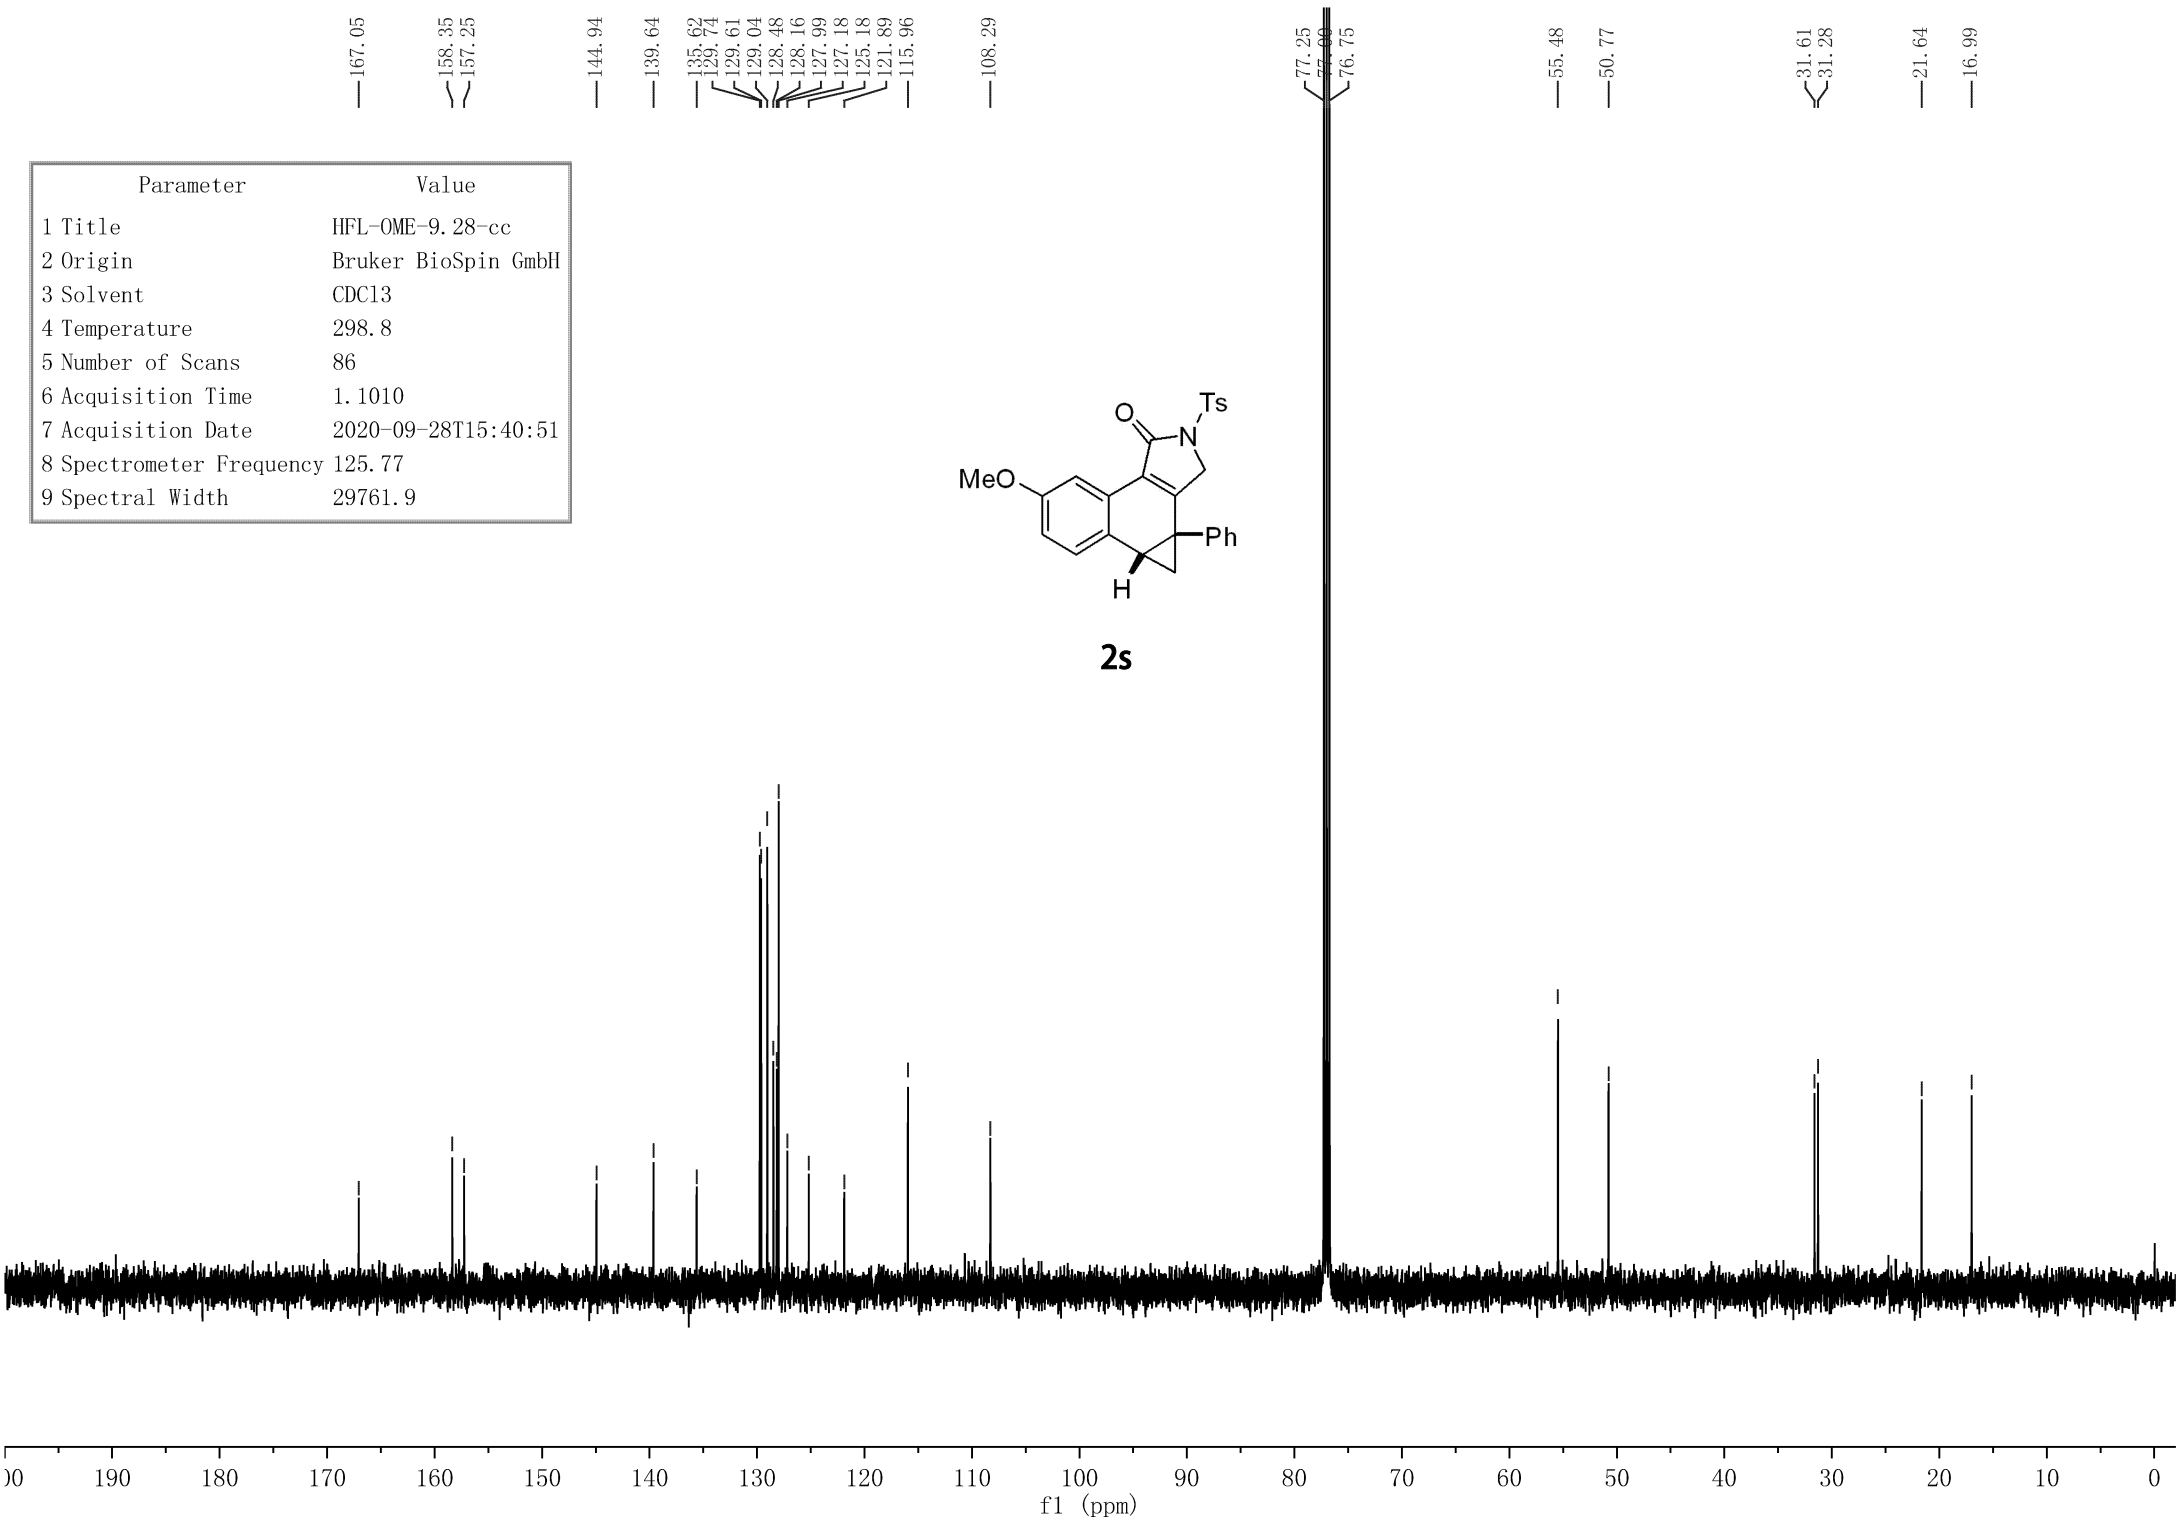

| Parameter                | Value                |
|--------------------------|----------------------|
| 1 Title                  | HFL-OME-9.28-cc-DEPT |
| 2 Origin                 | Bruker BioSpin GmbH  |
| 3 Solvent                | CDC13                |
| 4 Temperature            | 298.8                |
| 5 Number of Scans        | 15                   |
| 6 Acquisition Time       | 1.1010               |
| 7 Acquisition Date       | 2020-09-28T15:44:42  |
| 8 Spectrometer Frequency | 125.77               |
| 9 Spectral Width         | 29761.9              |

129.74  
129.61  
129.04  
128.48  
128.16  
127.99

115.96

108.29

55.48

50.77

31.28

21.64

16.99

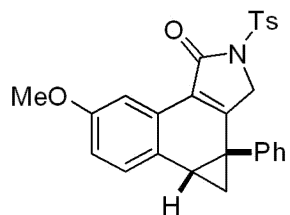

**2s**

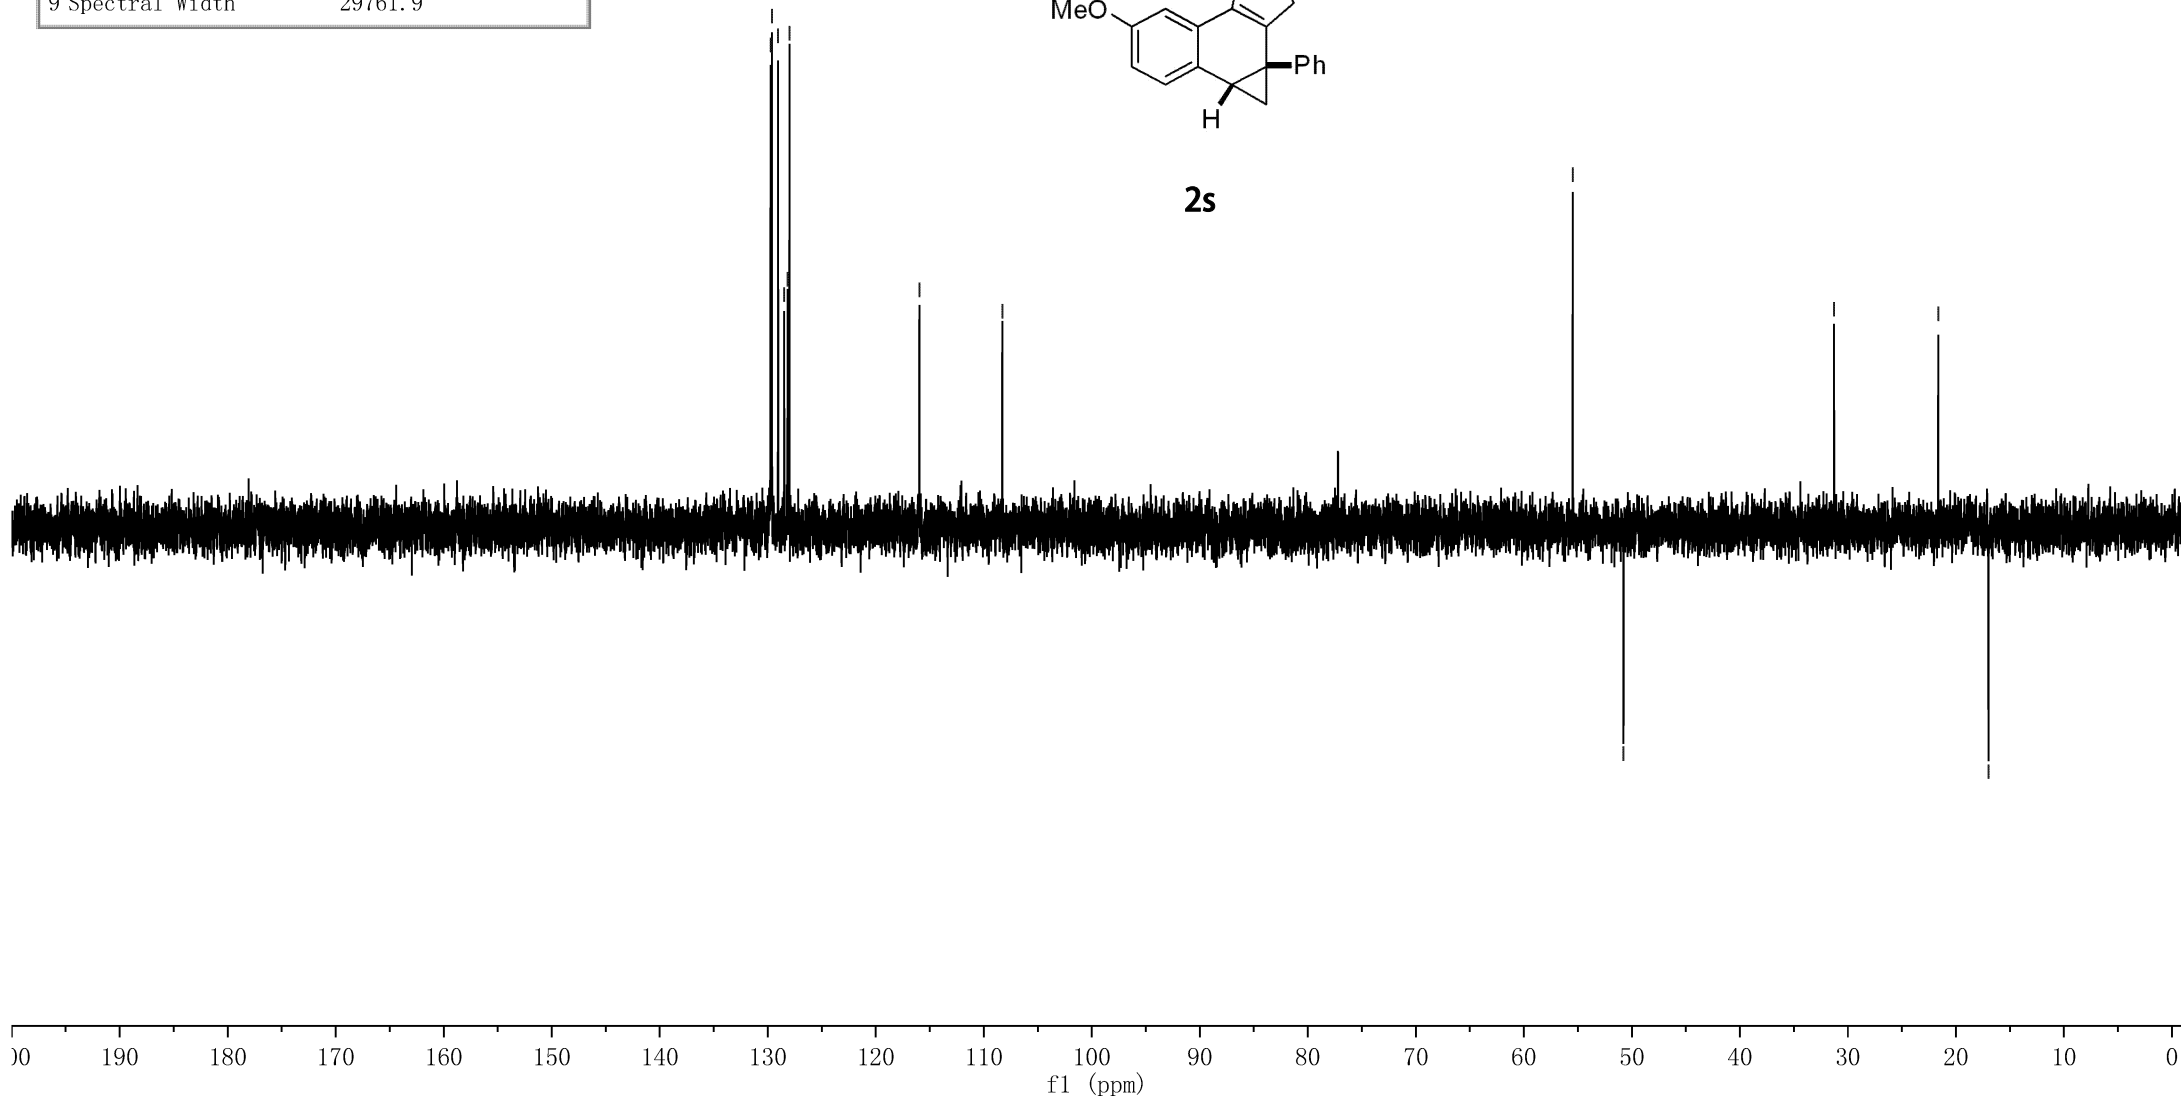

8.237  
8.230  
8.212  
8.205  
7.961  
7.940  
7.380  
7.363  
7.330  
7.316  
7.310  
7.306  
7.034  
7.013  
6.999  
6.992  
6.978  
6.971

4.517  
4.469  
4.140  
4.092

2.862  
2.847  
2.838  
2.824  
2.416  
2.307  
2.296  
2.283  
2.273

0.419  
0.408  
0.404  
0.393

| Parameter                | Value               |
|--------------------------|---------------------|
| 1 Title                  | hfl-5-157-H         |
| 2 Origin                 | Bruker BioSpin GmbH |
| 3 Solvent                | CDC13               |
| 4 Temperature            | 299.6               |
| 5 Number of Scans        | 5                   |
| 6 Acquisition Time       | 3.9846              |
| 7 Acquisition Date       | 2018-07-11T17:14:17 |
| 8 Spectrometer Frequency | 400.13              |
| 9 Spectral Width         | 8223.7              |

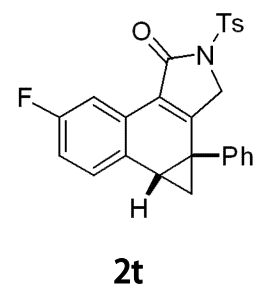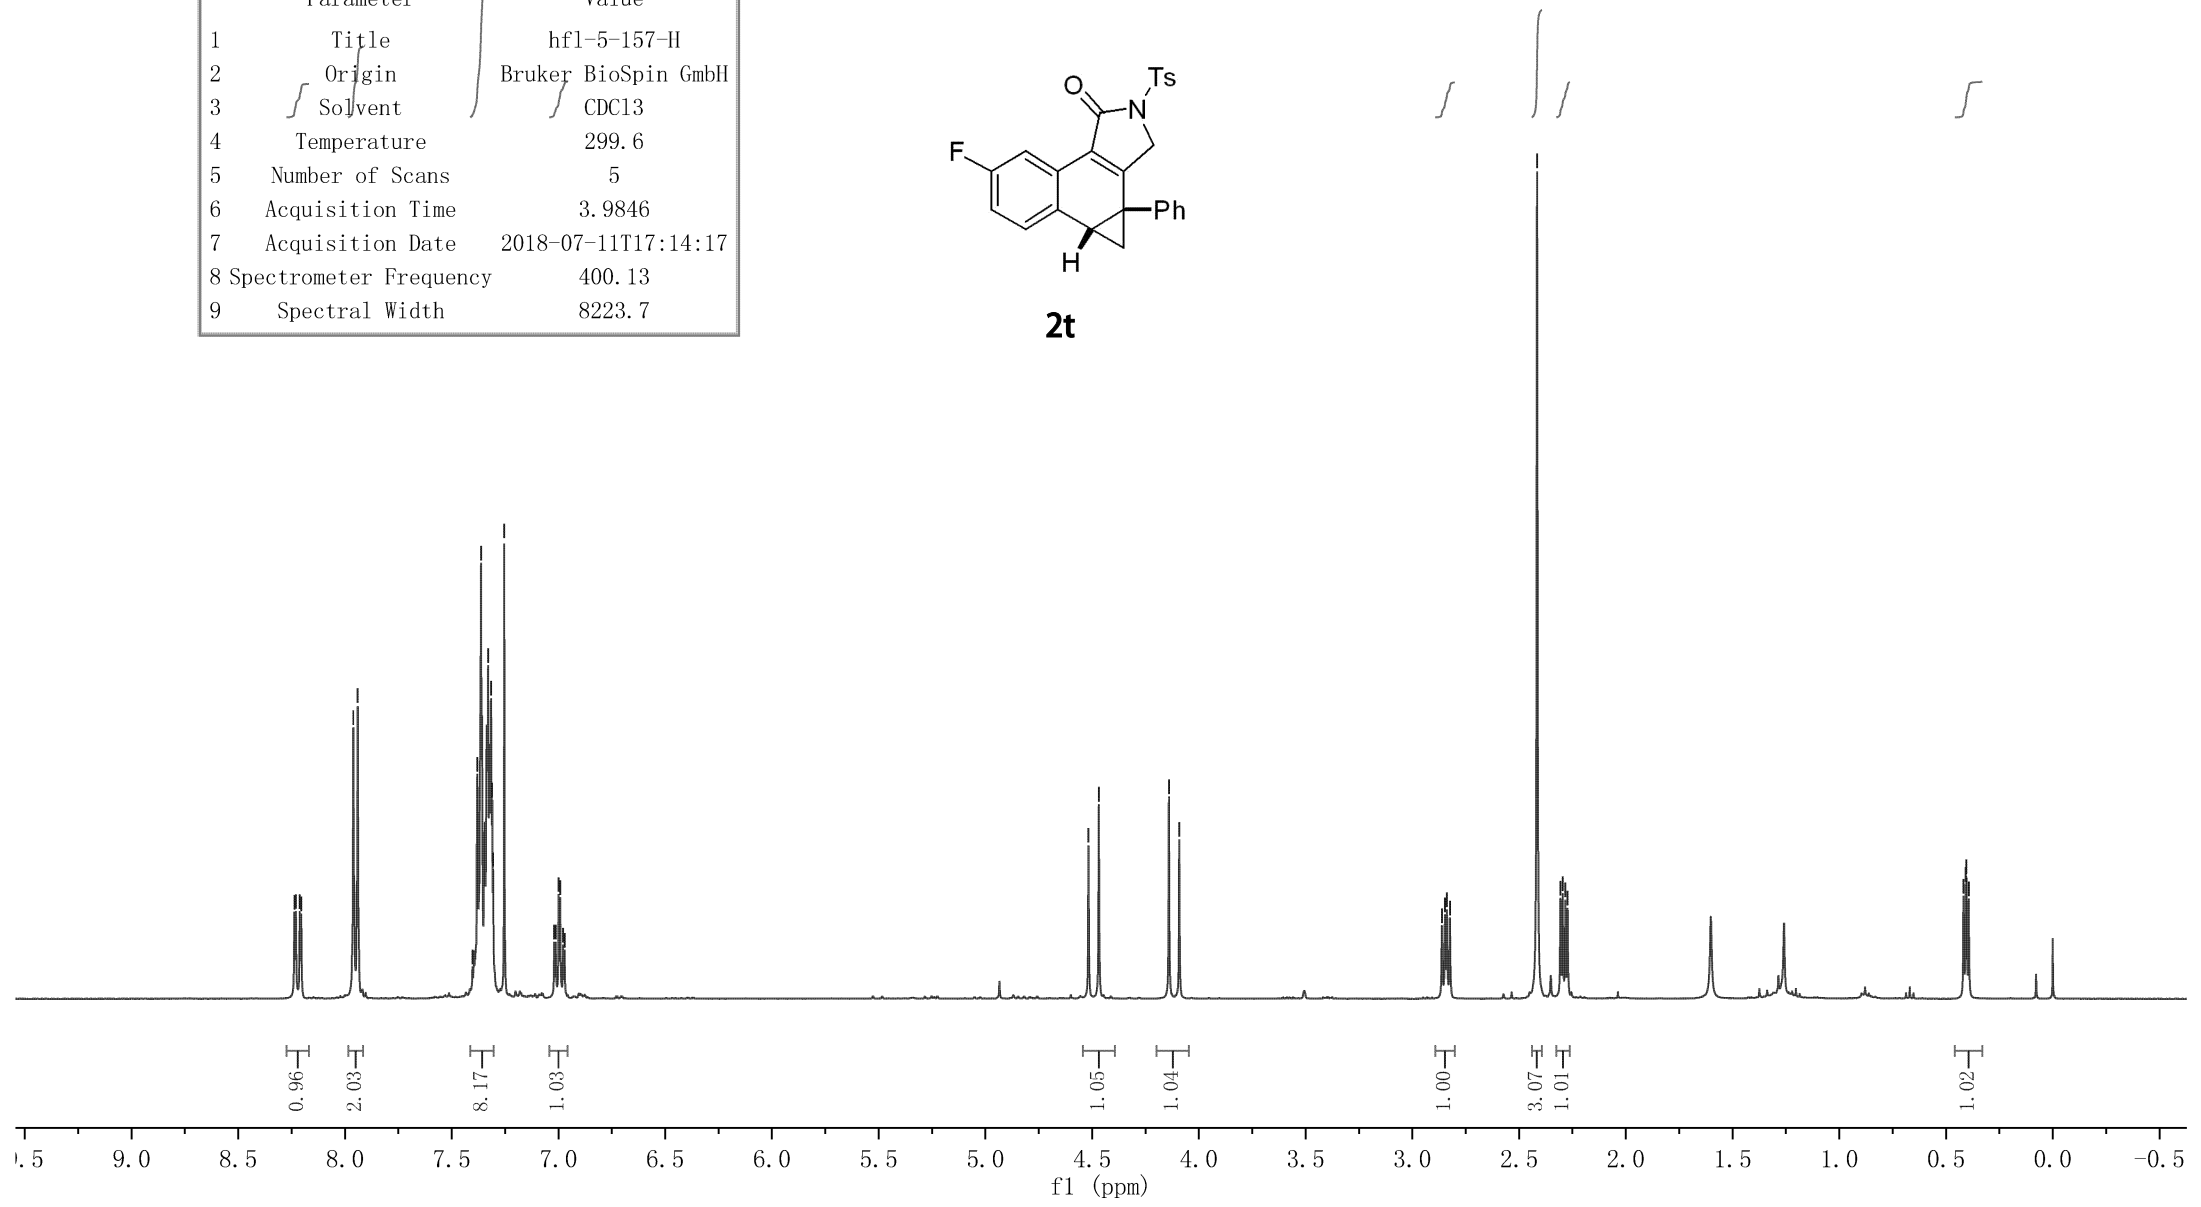



| Parameter                | Value               |
|--------------------------|---------------------|
| 1 Title                  | hf1-5-157-C         |
| 2 Origin                 | Bruker BioSpin GmbH |
| 3 Solvent                | CDC13               |
| 4 Temperature            | 299.5               |
| 5 Number of Scans        | 170                 |
| 6 Acquisition Time       | 1.3631              |
| 7 Acquisition Date       | 2018-07-11T17:16:16 |
| 8 Spectrometer Frequency | 100.61              |
| 9 Spectral Width         | 24038.5             |

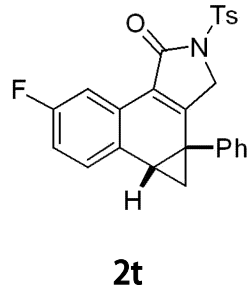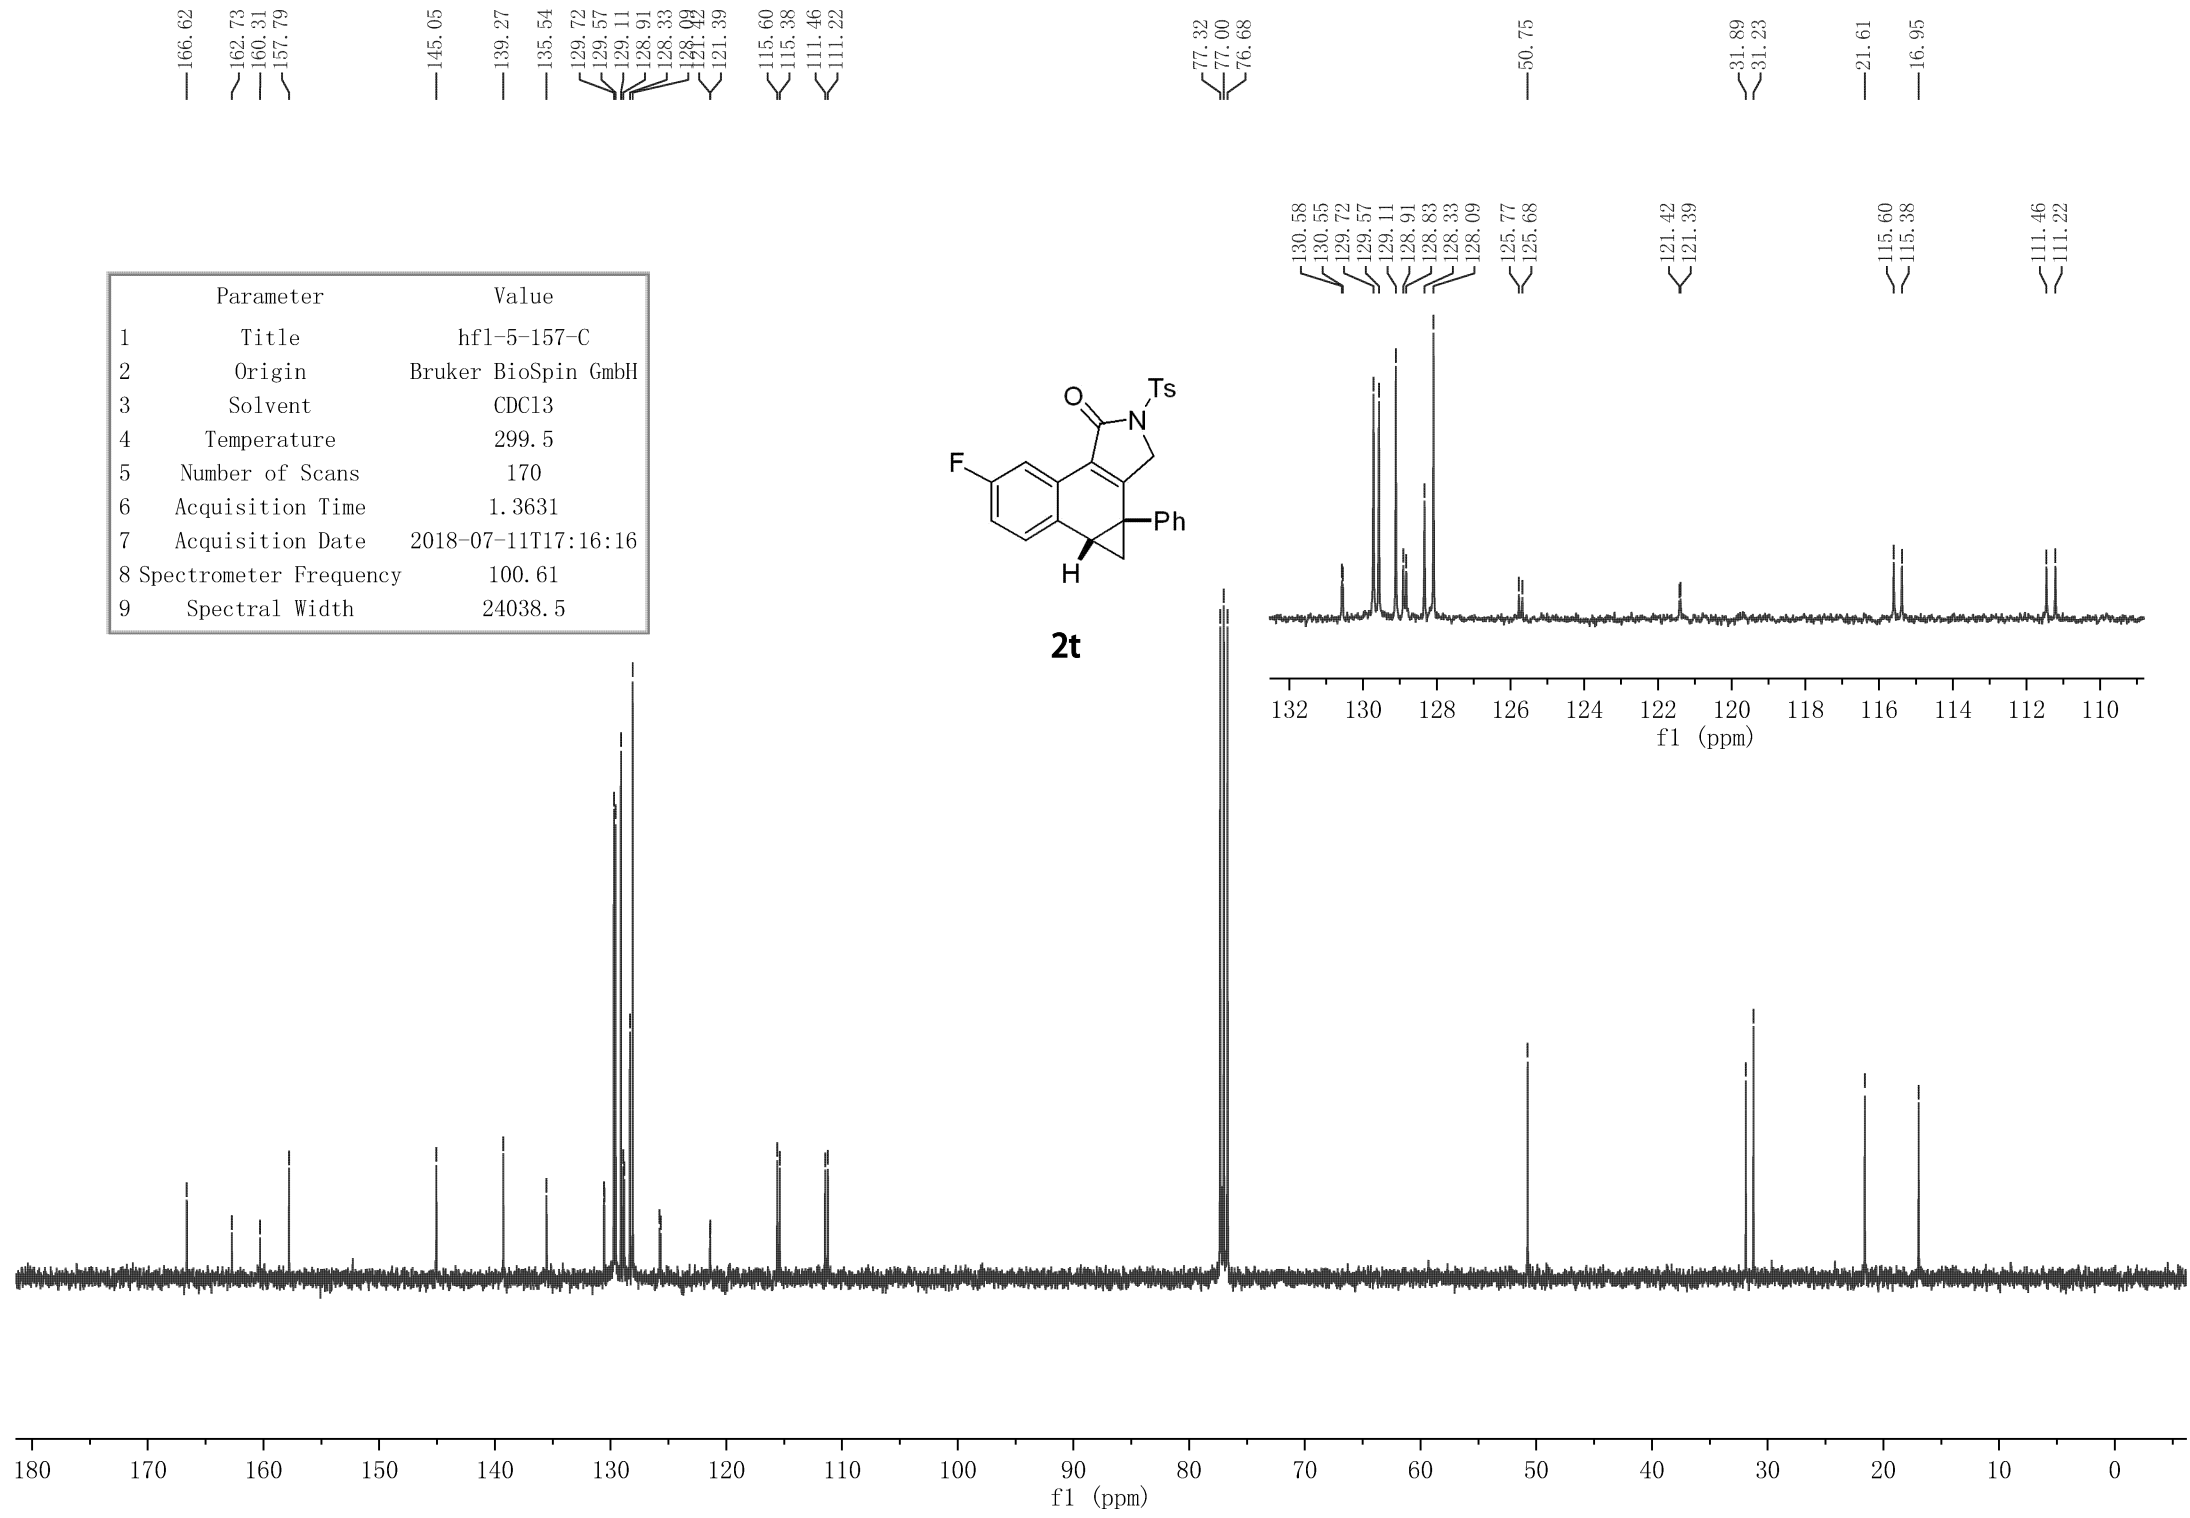

| Parameter                | Value               |
|--------------------------|---------------------|
| 1 Title                  | scy-15-2t1          |
| 2 Origin                 | Bruker BioSpin GmbH |
| 3 Solvent                | CDCl3               |
| 4 Temperature            | 295.4               |
| 5 Number of Scans        | 12                  |
| 6 Acquisition Time       | 0.7340              |
| 7 Acquisition Date       | 2022-01-08T18:05:29 |
| 8 Spectrometer Frequency | 376.31              |
| 9 Spectral Width         | 89285.7             |

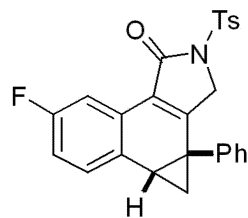

**2t**

—114.94

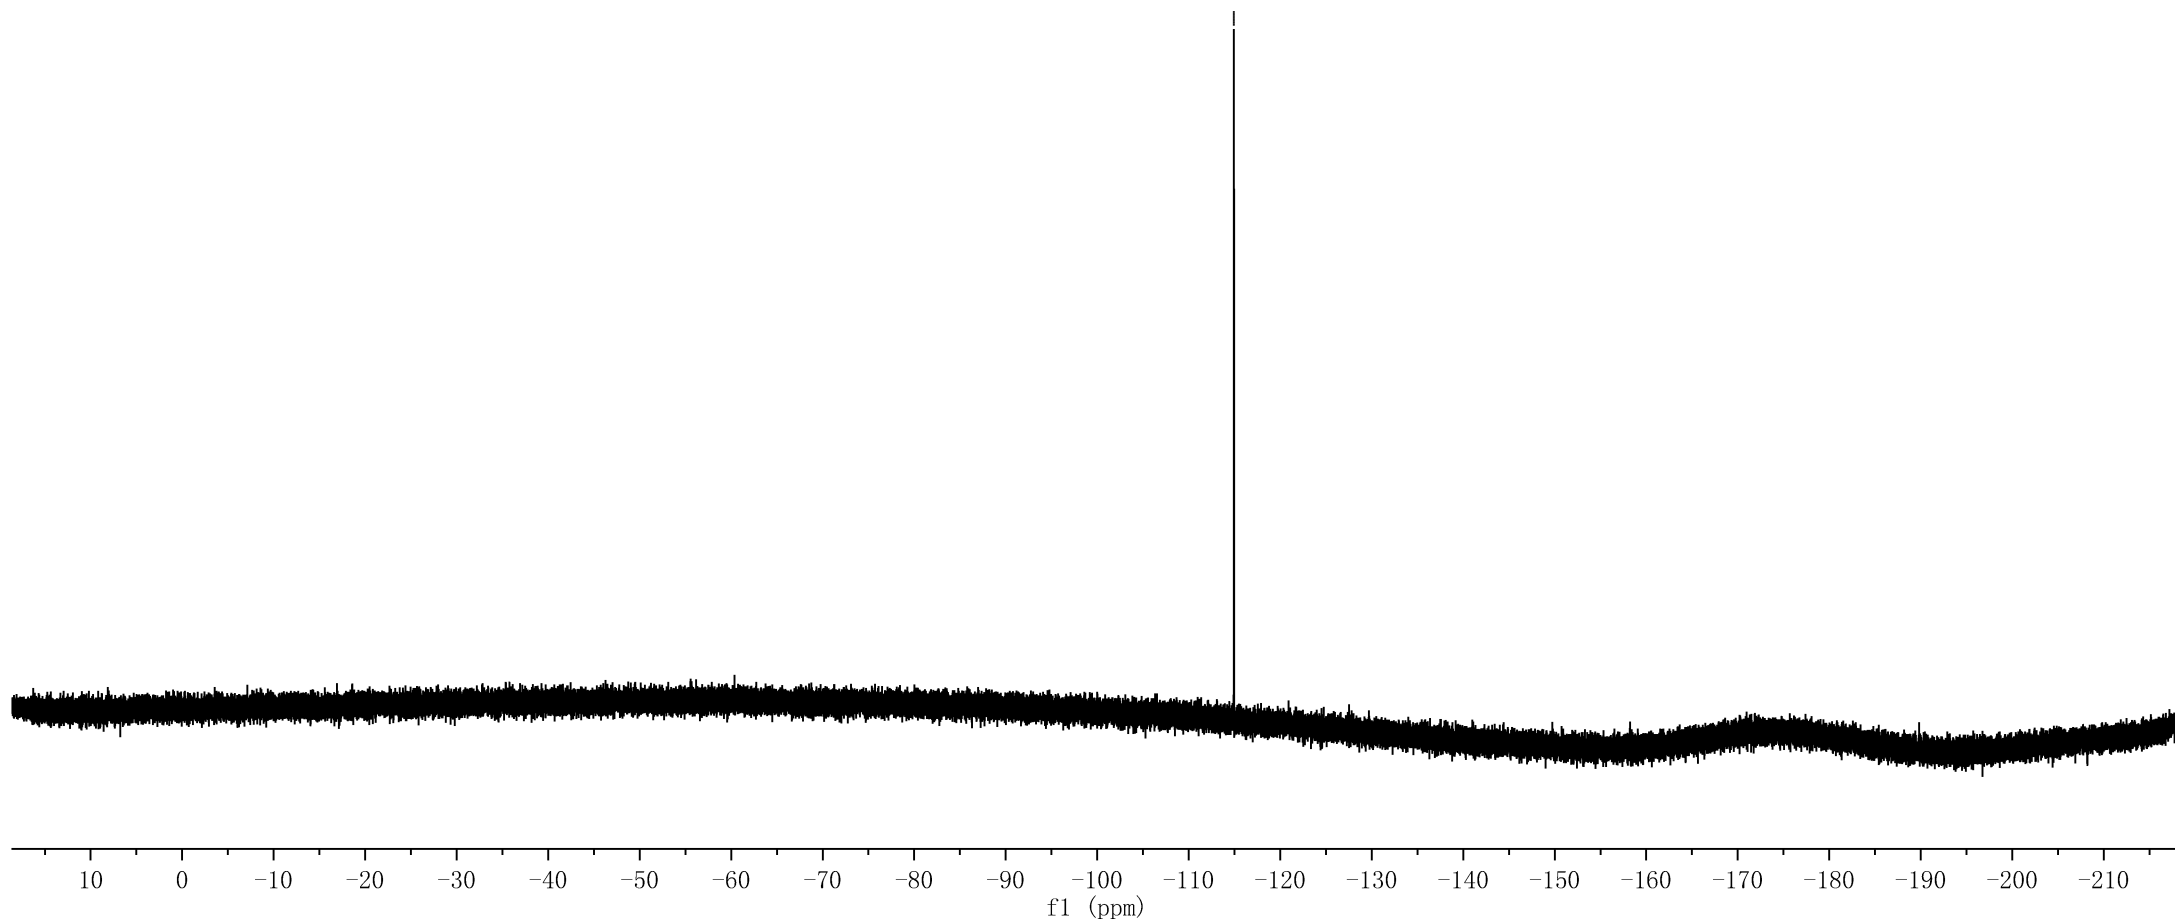

8.109  
7.960  
7.943

7.376  
7.361  
7.342  
7.328  
7.317

6.931

4.467  
4.429

4.126  
4.088  
3.916

2.795  
2.784  
2.776  
2.765  
2.424  
2.249  
2.241  
2.231  
2.222

0.400  
0.390  
0.380

| Parameter                | Value               |
|--------------------------|---------------------|
| 1 Title                  | HFL-DIOME-H-10.1    |
| 2 Origin                 | Bruker BioSpin GmbH |
| 3 Solvent                | CDC13               |
| 4 Temperature            | 298.4               |
| 5 Number of Scans        | 7                   |
| 6 Acquisition Time       | 3.1719              |
| 7 Acquisition Date       | 2020-10-01T14:40:26 |
| 8 Spectrometer Frequency | 500.17              |
| 9 Spectral Width         | 10330.6             |

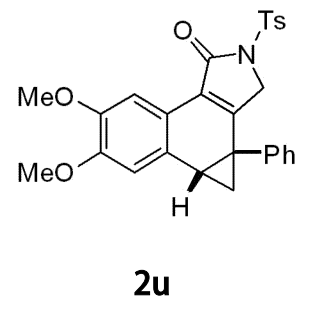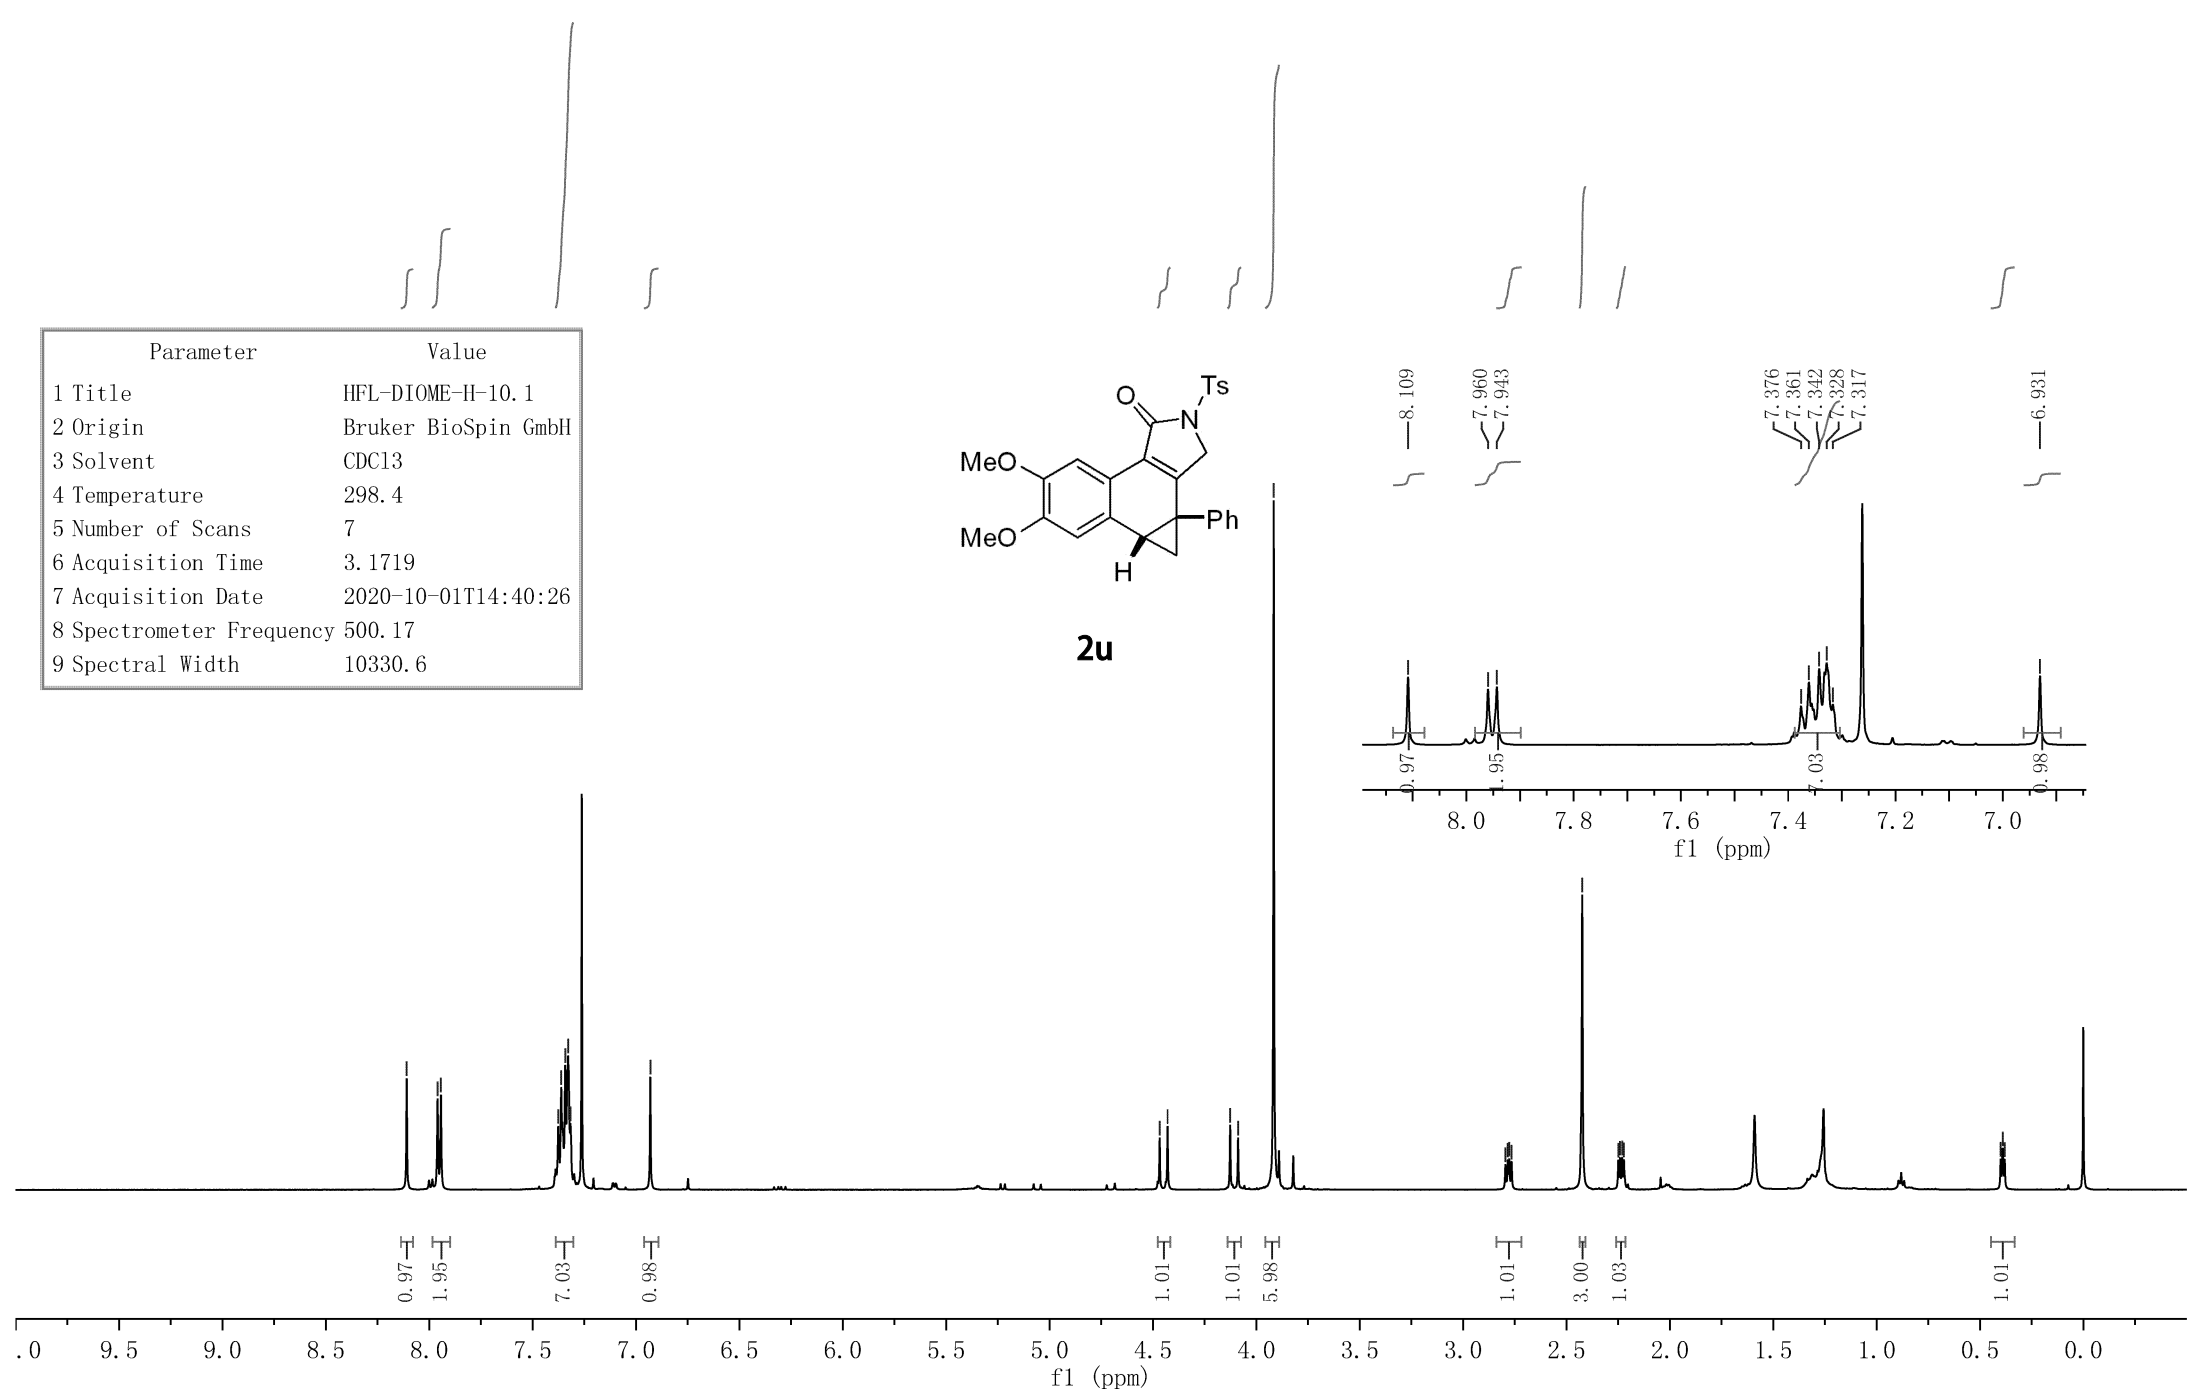

| Parameter                | Value               |
|--------------------------|---------------------|
| 1 Title                  | HFL-DIOME-C-10.1    |
| 2 Origin                 | Bruker BioSpin GmbH |
| 3 Solvent                | CDC13               |
| 4 Temperature            | 299.4               |
| 5 Number of Scans        | 157                 |
| 6 Acquisition Time       | 1.1010              |
| 7 Acquisition Date       | 2020-10-01T14:47:45 |
| 8 Spectrometer Frequency | 125.77              |
| 9 Spectral Width         | 29761.9             |

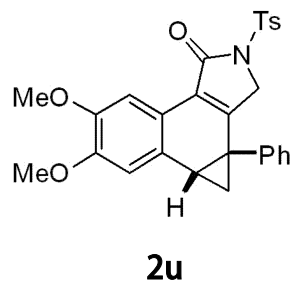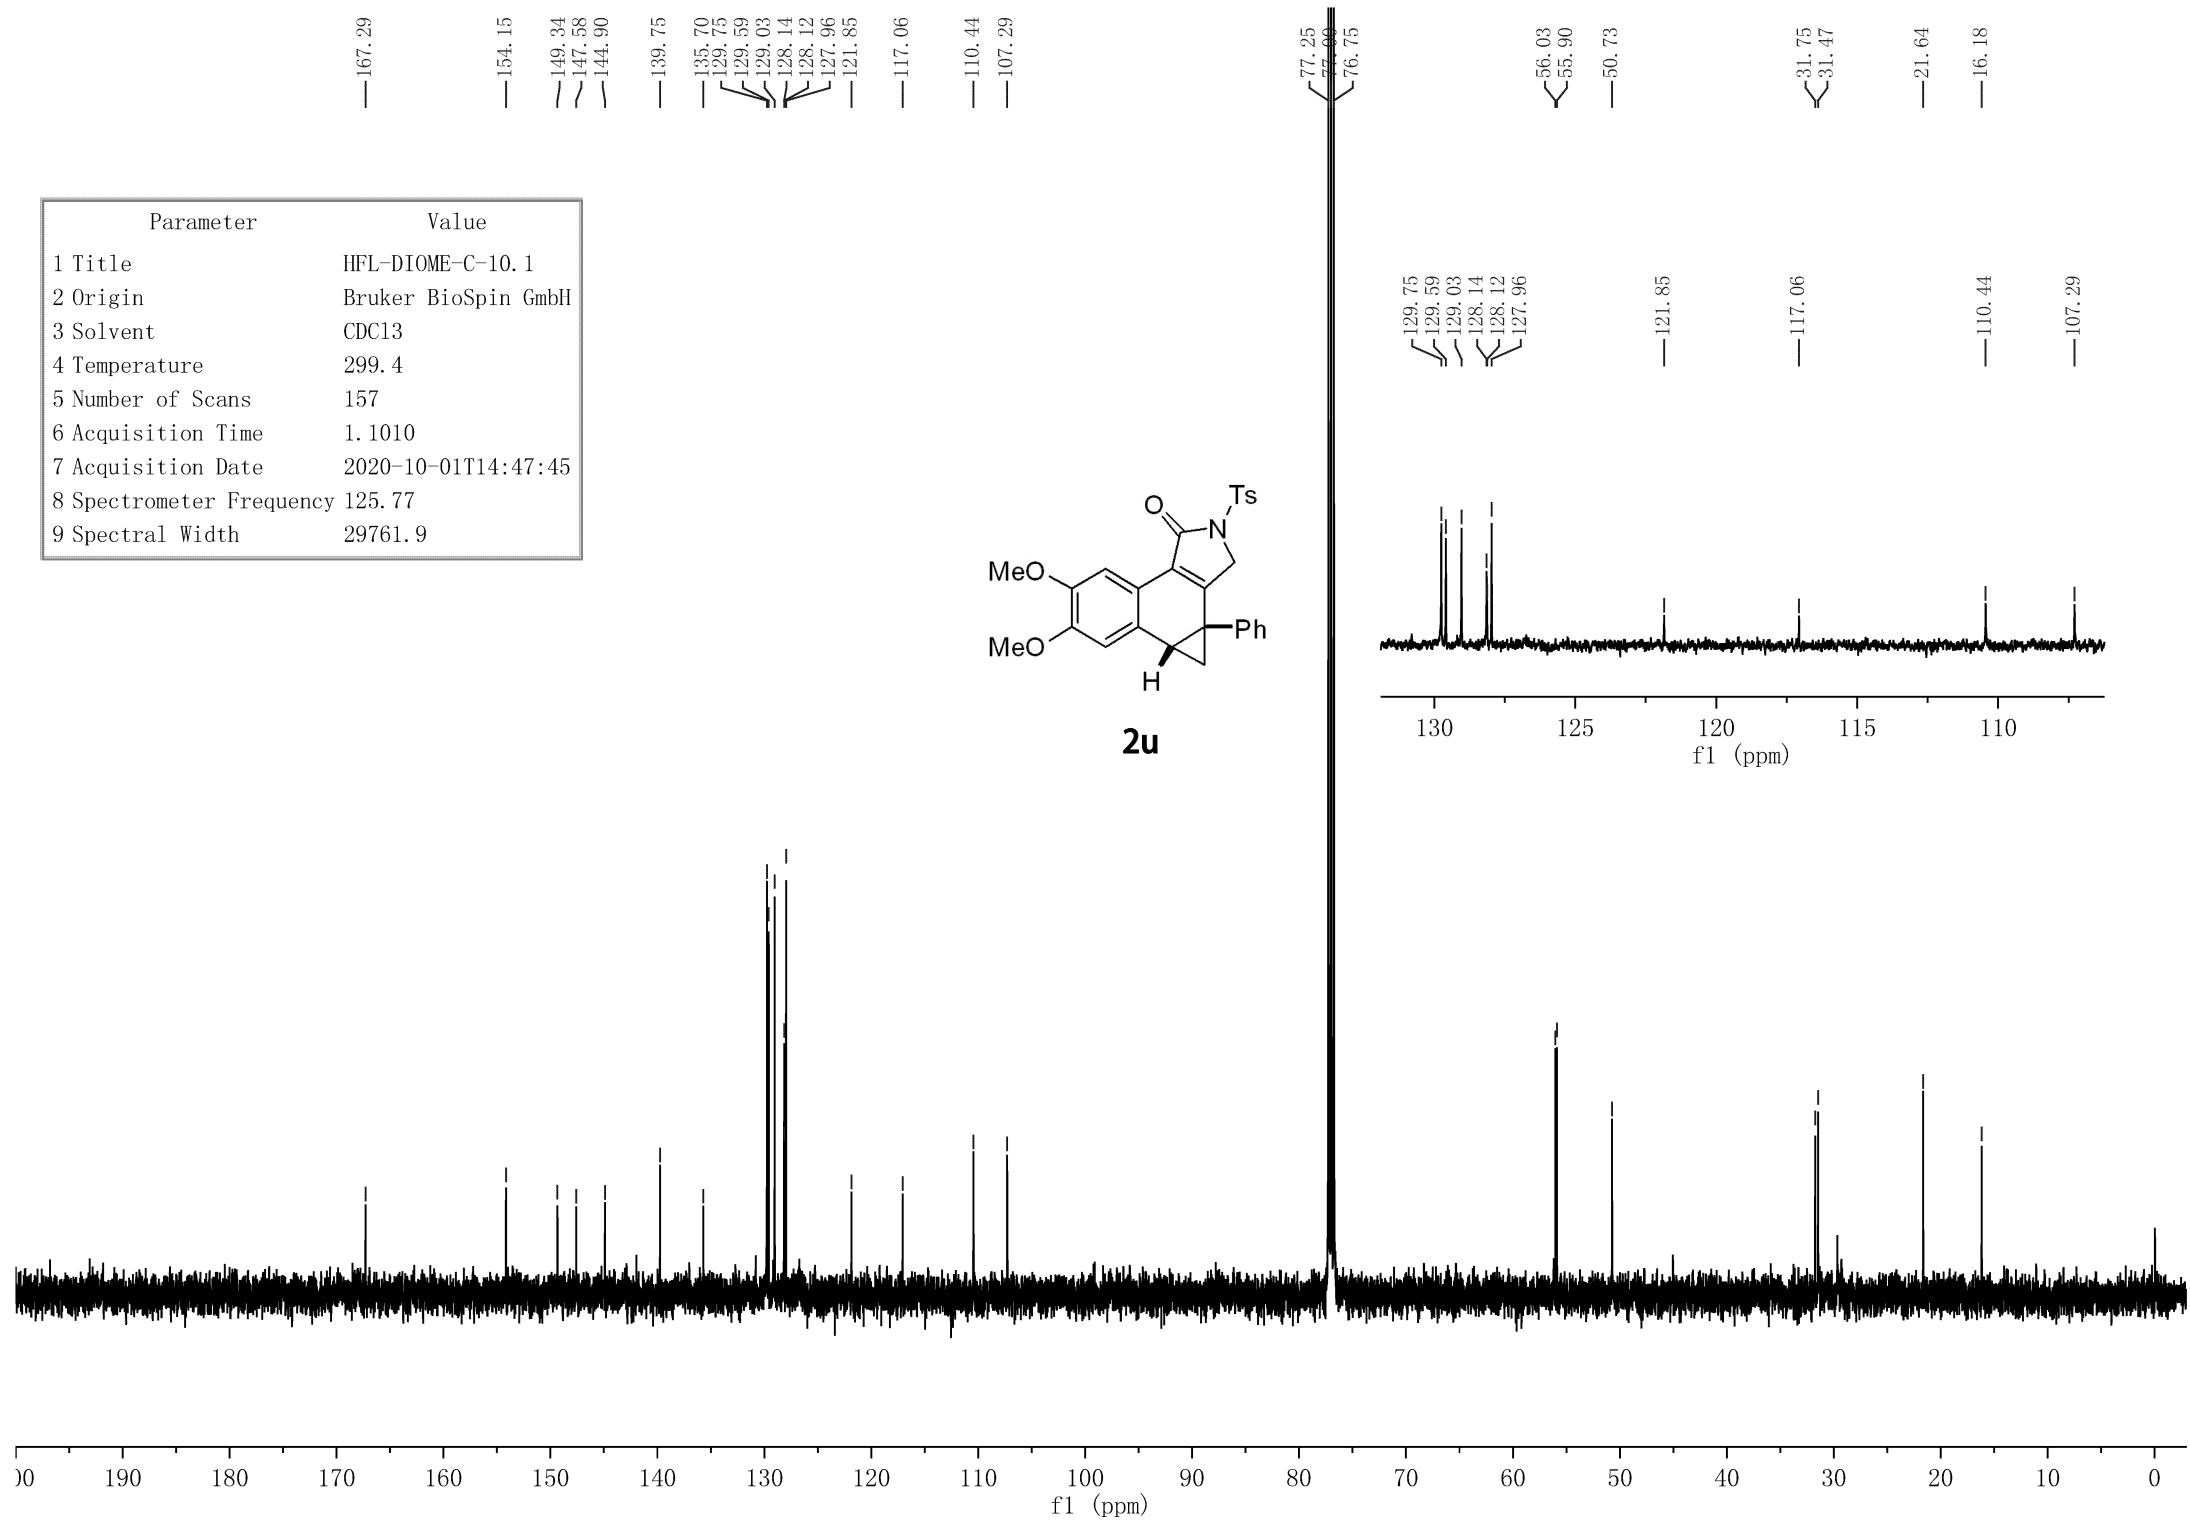

| Parameter                | Value               |
|--------------------------|---------------------|
| 1 Title                  | 6-38-h              |
| 2 Origin                 | Bruker BioSpin GmbH |
| 3 Solvent                | CDC13               |
| 4 Temperature            | 296.5               |
| 5 Number of Scans        | 6                   |
| 6 Acquisition Time       | 3.9846              |
| 7 Acquisition Date       | 2018-08-12T16:09:39 |
| 8 Spectrometer Frequency | 400.13              |
| 9 Spectral Width         | 8223.7              |

7.970  
7.948  
7.386  
7.365  
7.349  
7.173  
7.154  
7.126  
7.103  
7.027  
7.006  
6.839  
6.819  
6.560

5.737  
5.723  
5.710

4.463  
4.449

2.772

2.079

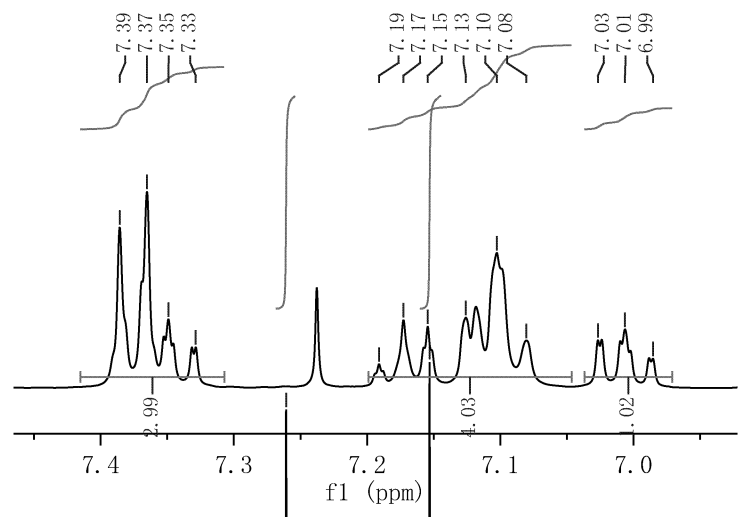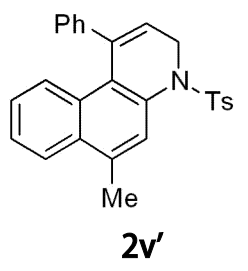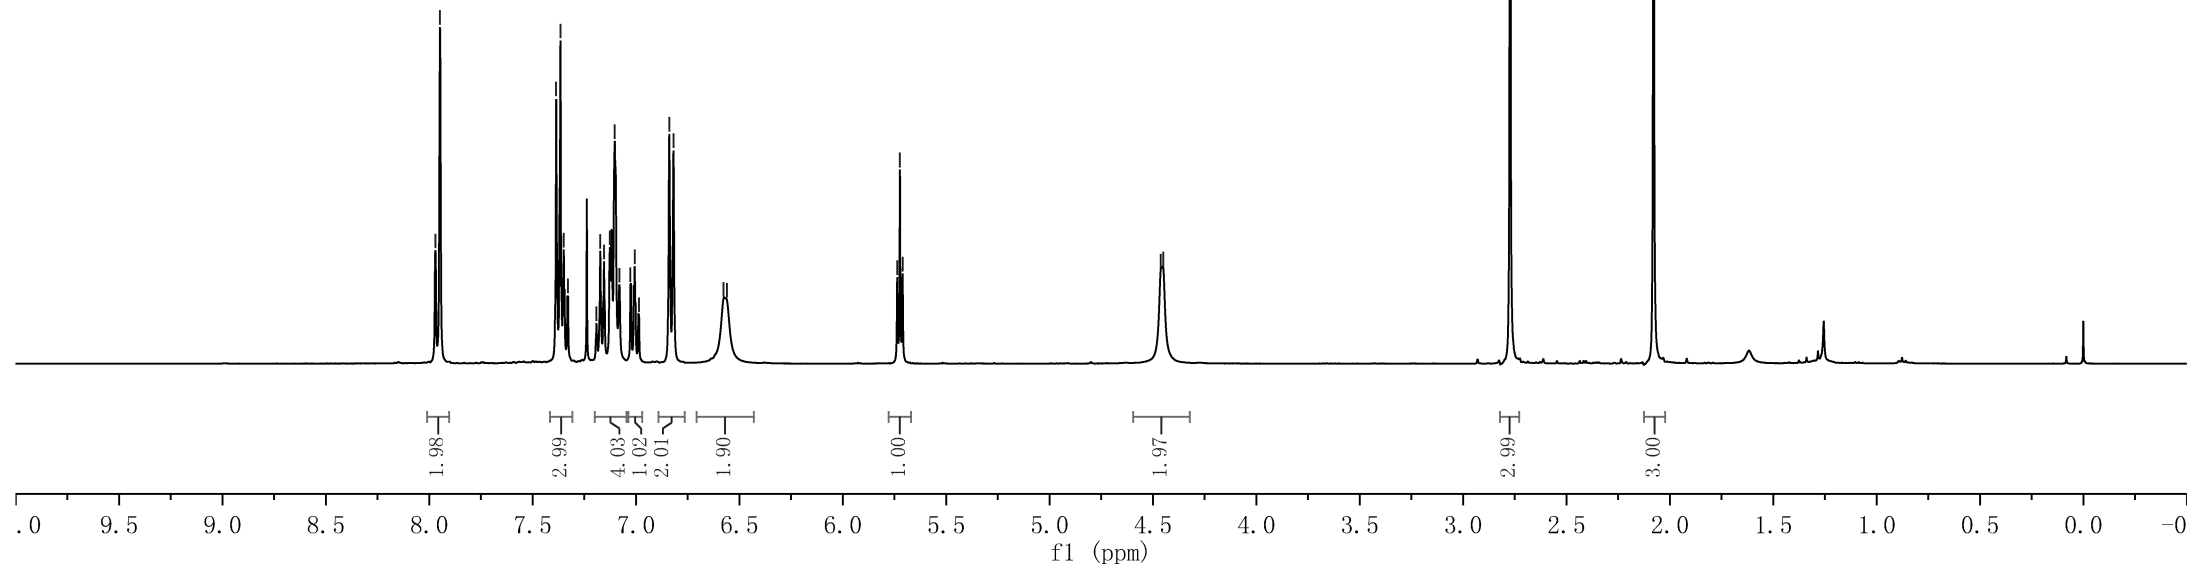

| Parameter                | Value               |
|--------------------------|---------------------|
| 1 Title                  | 6-38-C              |
| 2 Origin                 | Bruker BioSpin GmbH |
| 3 Solvent                | CDC13               |
| 4 Temperature            | 296.7               |
| 5 Number of Scans        | 16                  |
| 6 Acquisition Time       | 1.3631              |
| 7 Acquisition Date       | 2018-08-12T16:11:34 |
| 8 Spectrometer Frequency | 100.61              |
| 9 Spectral Width         | 24038.5             |

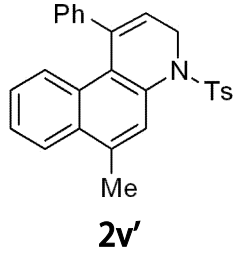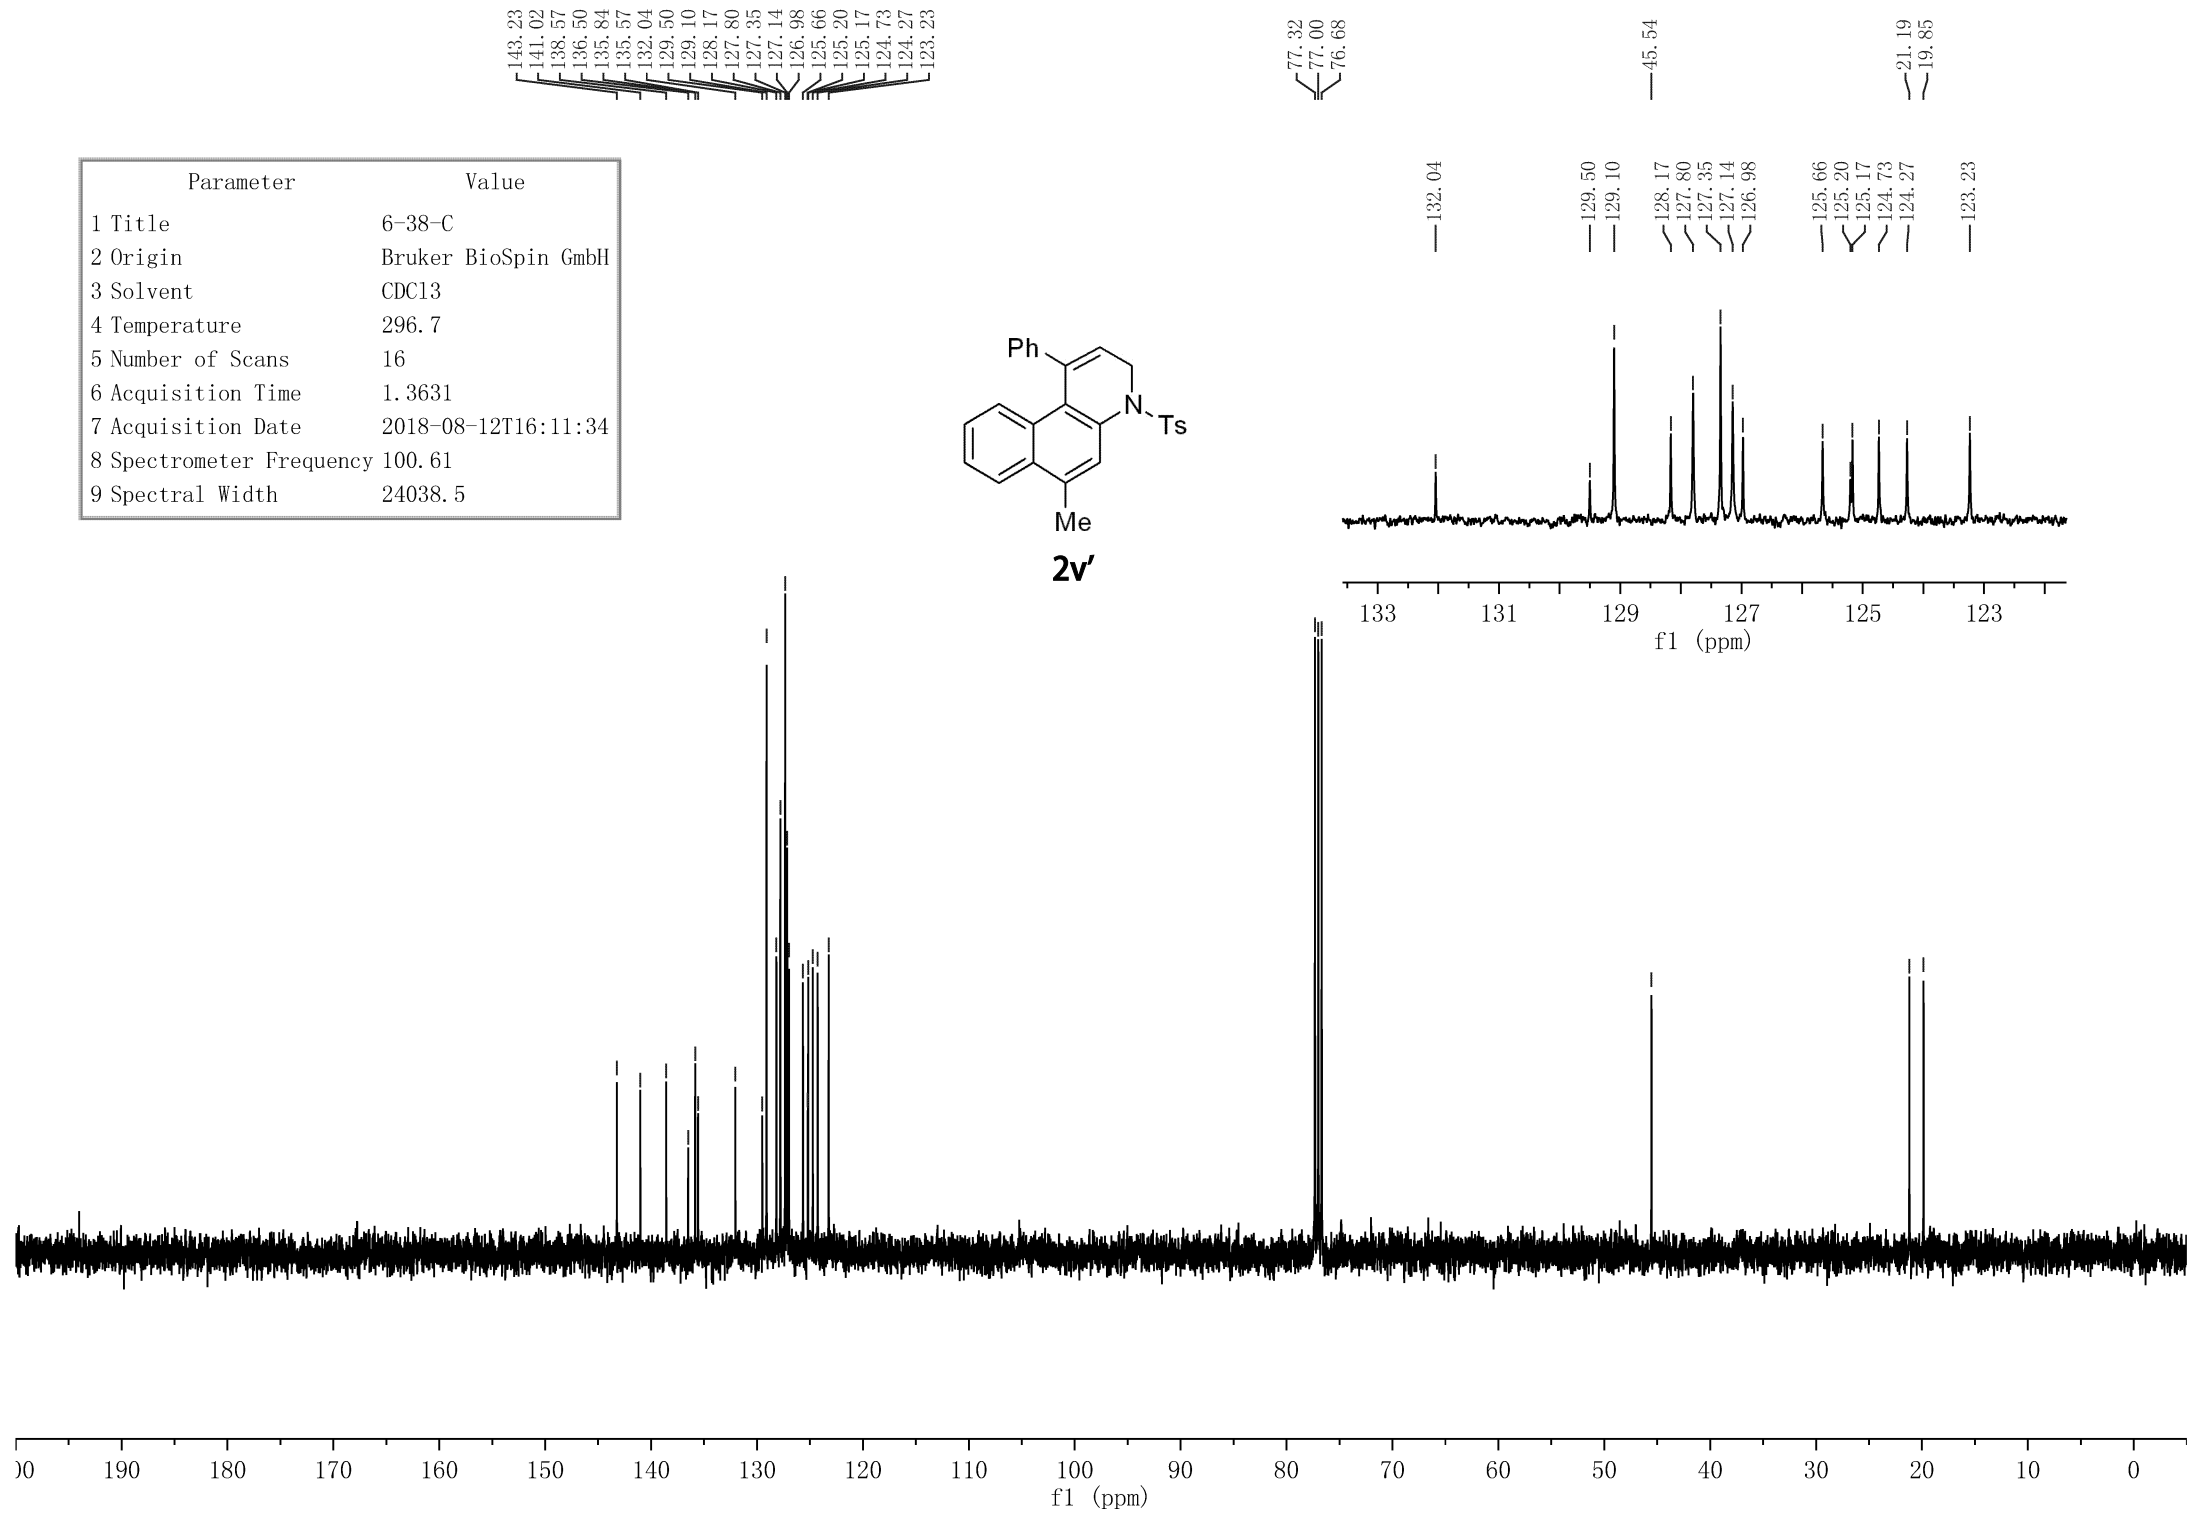

129.11  
128.18  
127.81  
127.36  
127.16  
126.99  
125.67  
125.18  
124.74  
124.28  
123.24

| Parameter                | Value               |
|--------------------------|---------------------|
| 1 Title                  | 6-38-C-DEPT         |
| 2 Origin                 | Bruker BioSpin GmbH |
| 3 Solvent                | CDC13               |
| 4 Temperature            | 297.0               |
| 5 Number of Scans        | 8                   |
| 6 Acquisition Time       | 1.3631              |
| 7 Acquisition Date       | 2018-08-12T16:13:08 |
| 8 Spectrometer Frequency | 100.61              |
| 9 Spectral Width         | 24038.5             |

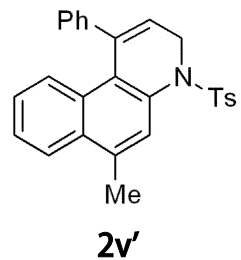

45.55

21.20  
19.85

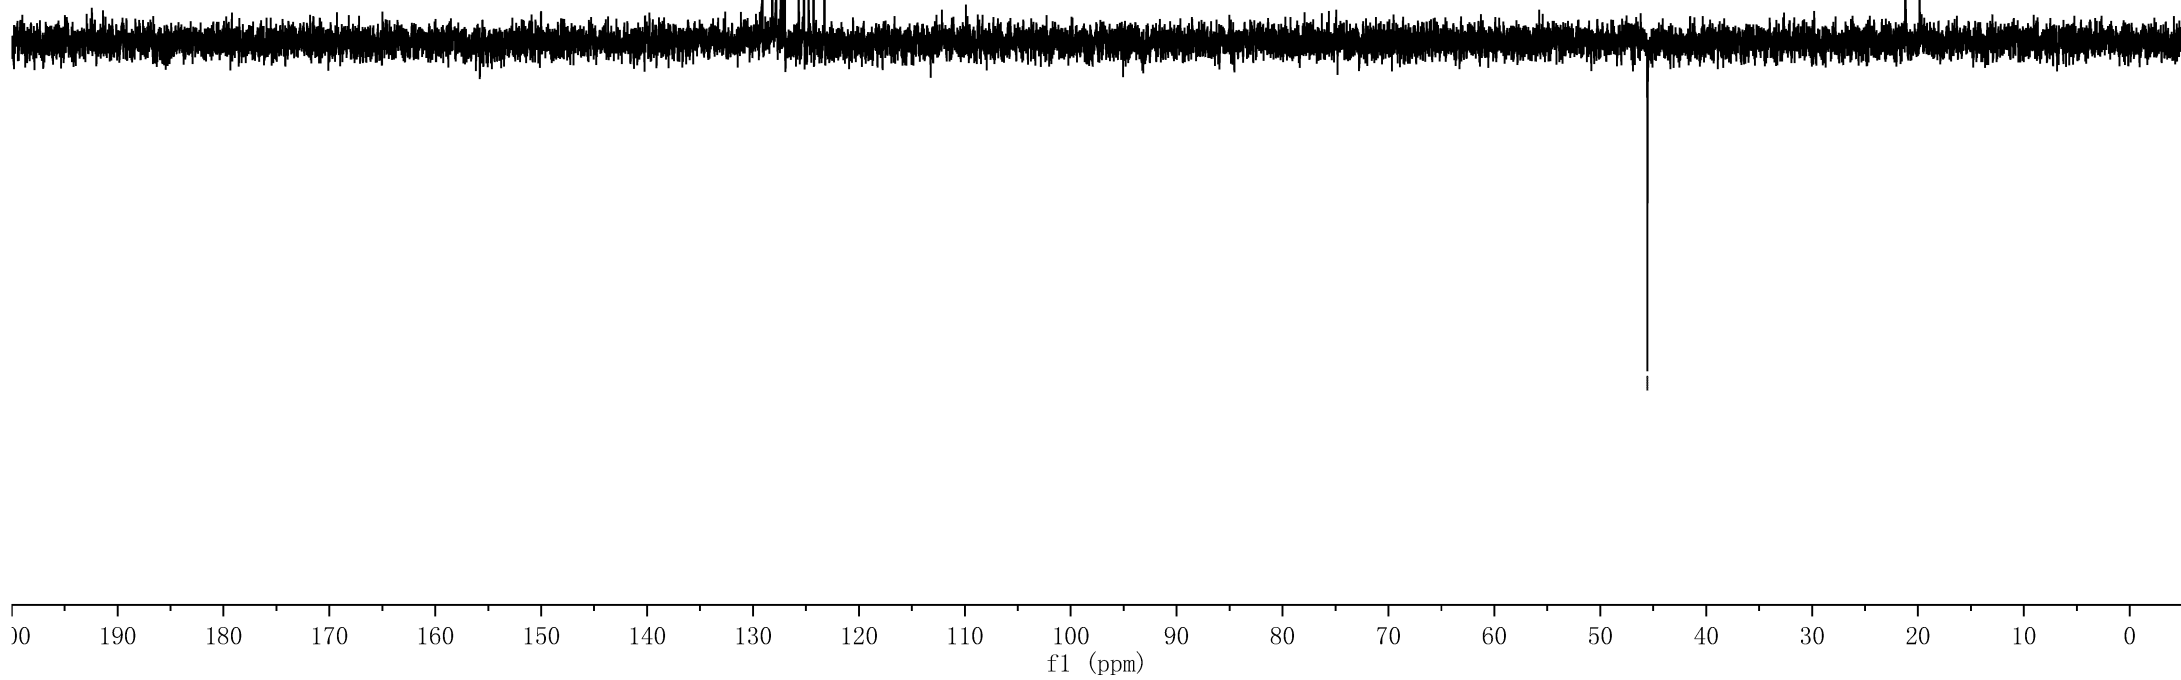

8.083  
8.069  
7.960  
7.943

7.309  
7.292  
7.247  
7.205  
7.128  
7.099  
7.085

4.208  
4.171  
4.161  
4.124  
3.942  
3.927  
3.920  
3.905

2.827  
2.799  
2.778  
2.732  
2.481  
2.464  
2.449  
2.399  
2.382  
2.020  
1.996  
1.969

8.083  
8.069  
7.960  
7.943

7.309  
7.292  
7.247  
7.205  
7.128  
7.099  
7.085

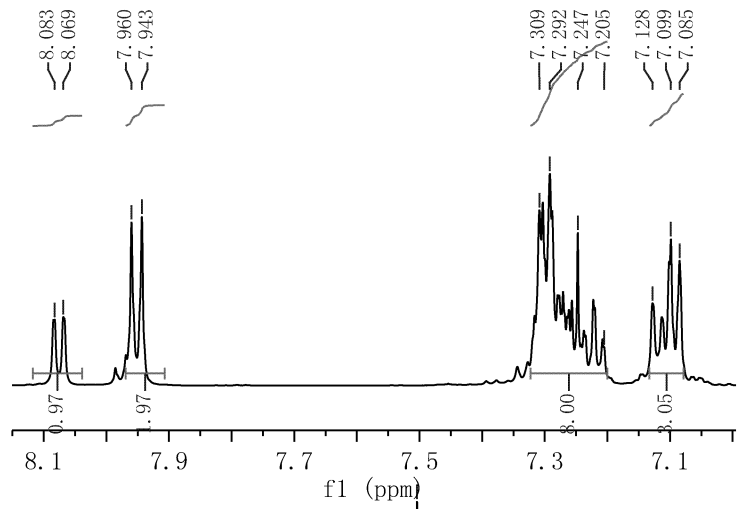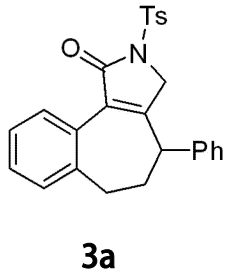

| Parameter                | Value               |
|--------------------------|---------------------|
| 1 Title                  | HFL-15-cyclo.-H     |
| 2 Origin                 | Bruker BioSpin GmbH |
| 3 Solvent                | CDC13               |
| 4 Temperature            | 298.0               |
| 5 Number of Scans        | 10                  |
| 6 Acquisition Time       | 3.1719              |
| 7 Acquisition Date       | 2020-09-06T09:09:07 |
| 8 Spectrometer Frequency | 500.17              |
| 9 Spectral Width         | 10330.6             |

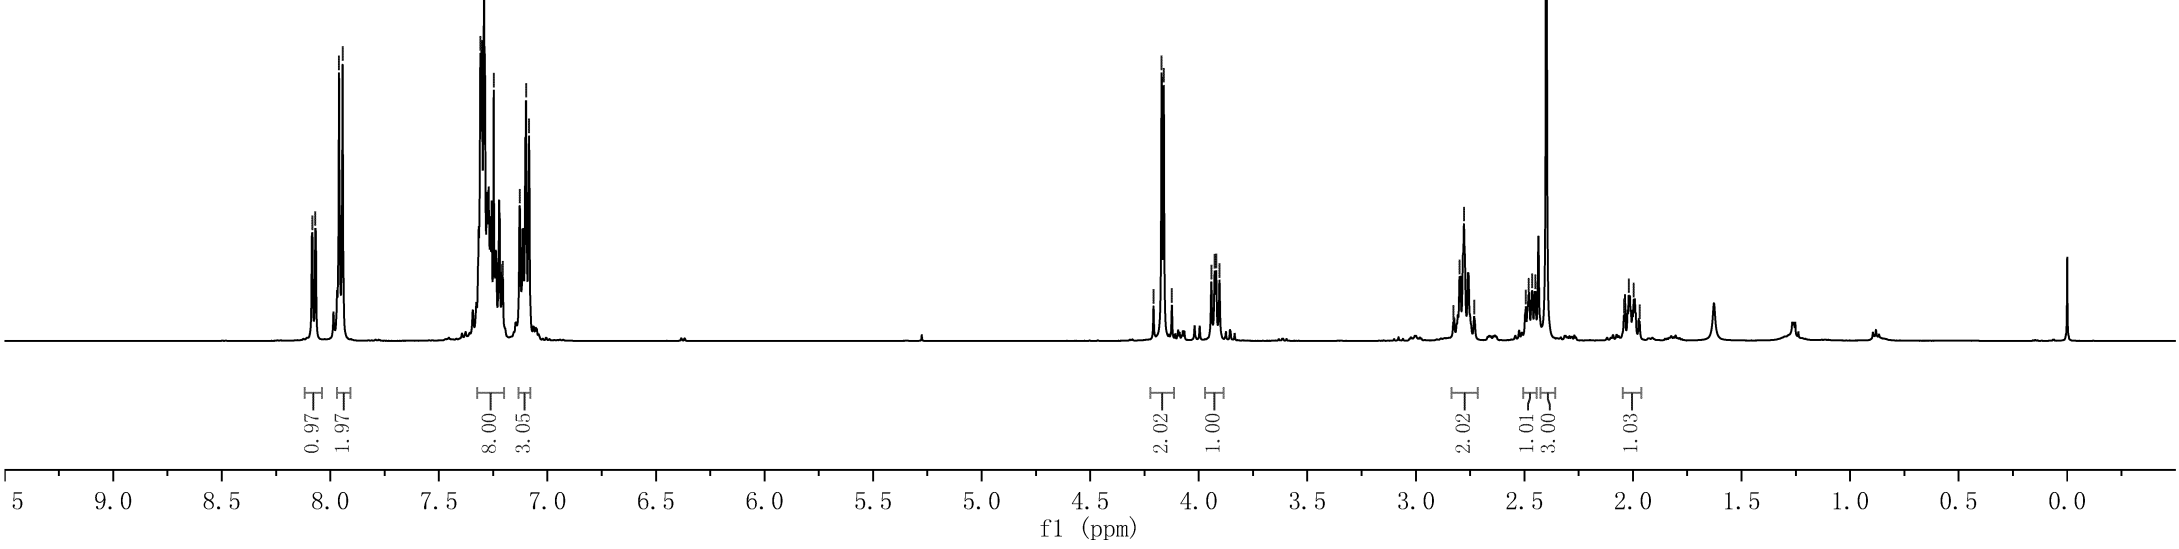



| Parameter                | Value               |
|--------------------------|---------------------|
| 1 Title                  | HFL-15-cyclo.-C     |
| 2 Origin                 | Bruker BioSpin GmbH |
| 3 Solvent                | CDC13               |
| 4 Temperature            | 298.7               |
| 5 Number of Scans        | 54                  |
| 6 Acquisition Time       | 1.1010              |
| 7 Acquisition Date       | 2020-09-06T09:14:12 |
| 8 Spectrometer Frequency | 125.77              |
| 9 Spectral Width         | 29761.9             |

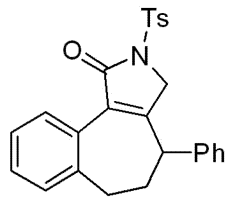

**3a**

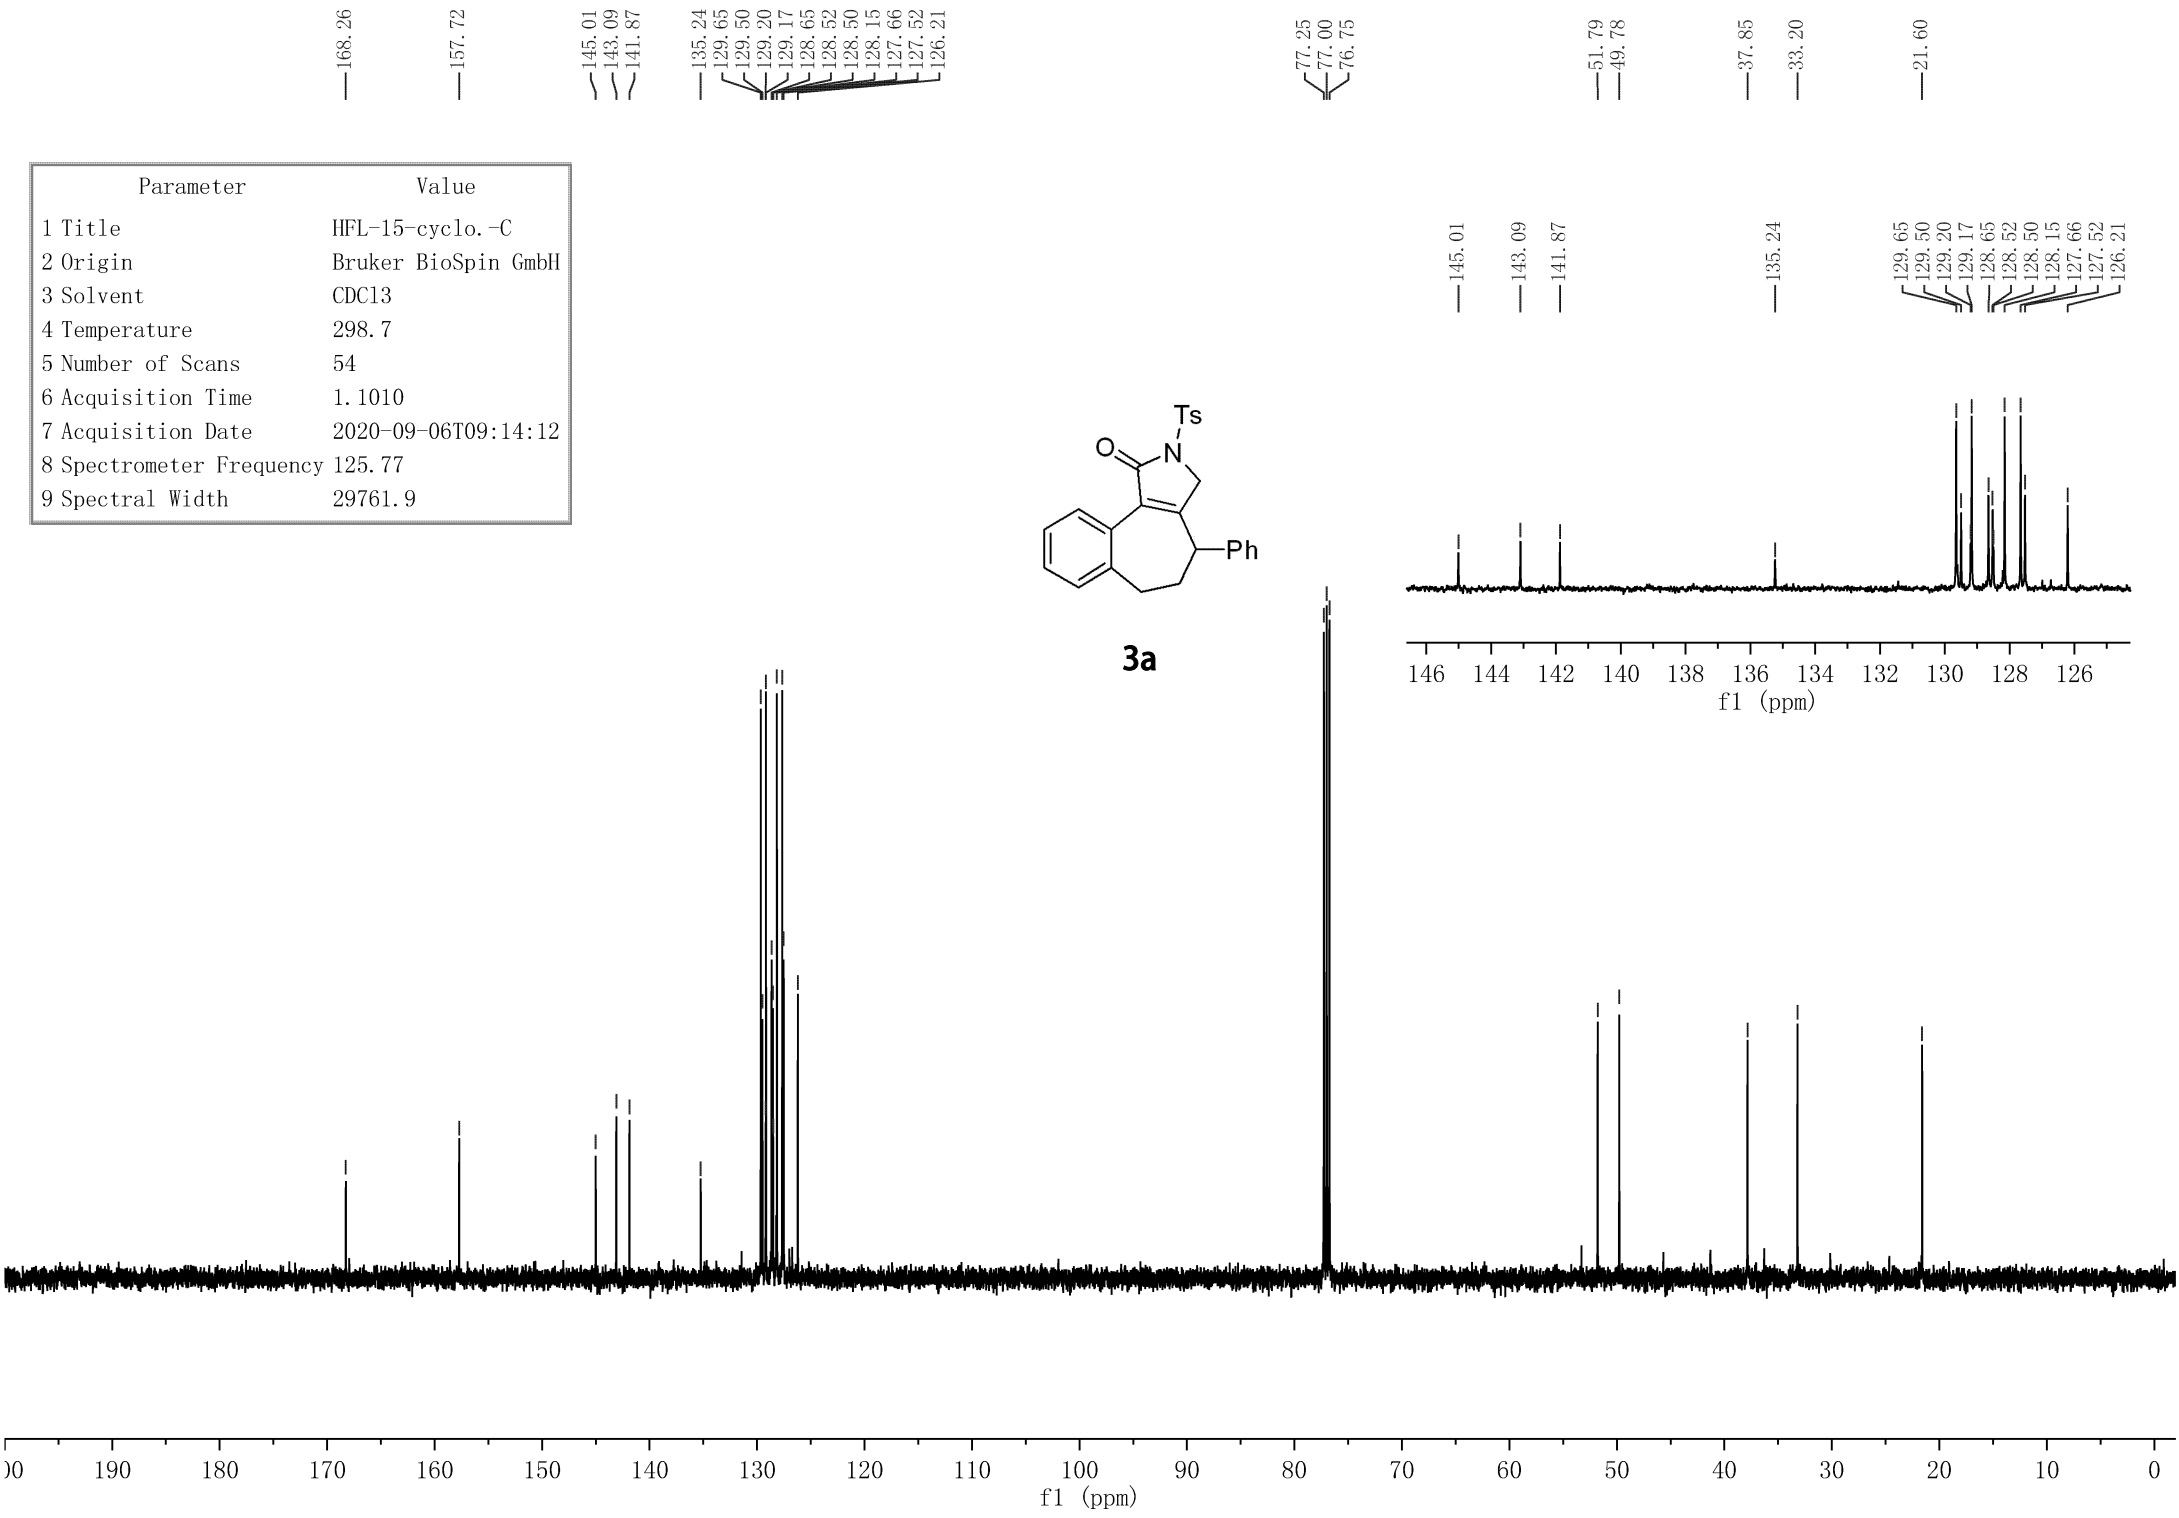

| Parameter                | Value                 |
|--------------------------|-----------------------|
| 1 Title                  | HFL-15-cyclo. -C-DEPT |
| 2 Origin                 | Bruker BioSpin GmbH   |
| 3 Solvent                | CDC13                 |
| 4 Temperature            | 298.6                 |
| 5 Number of Scans        | 13                    |
| 6 Acquisition Time       | 1.1010                |
| 7 Acquisition Date       | 2020-09-06T09:16:21   |
| 8 Spectrometer Frequency | 125.77                |
| 9 Spectral Width         | 29761.9               |

129.65  
129.50  
129.17  
128.65  
128.52  
128.15  
127.66  
127.52  
126.21

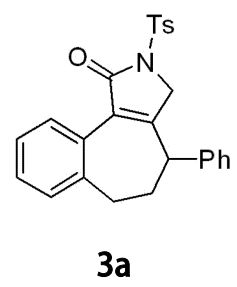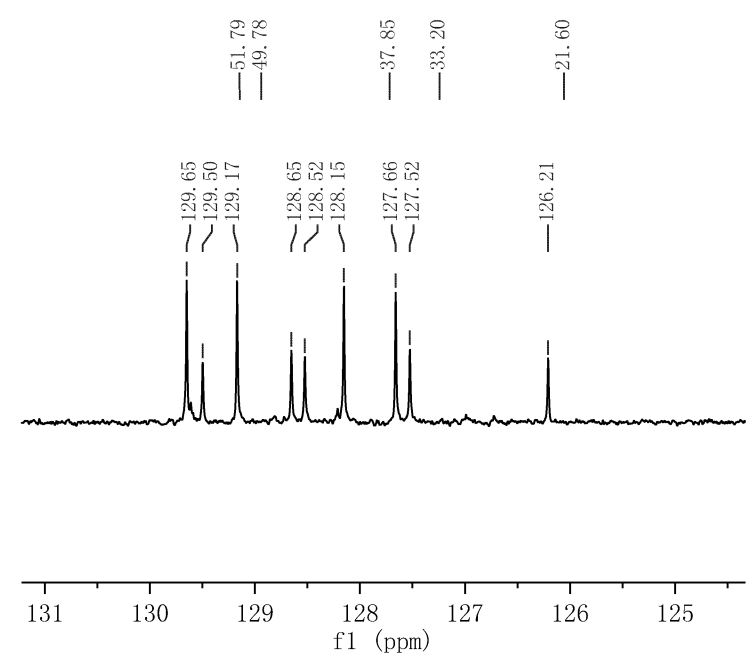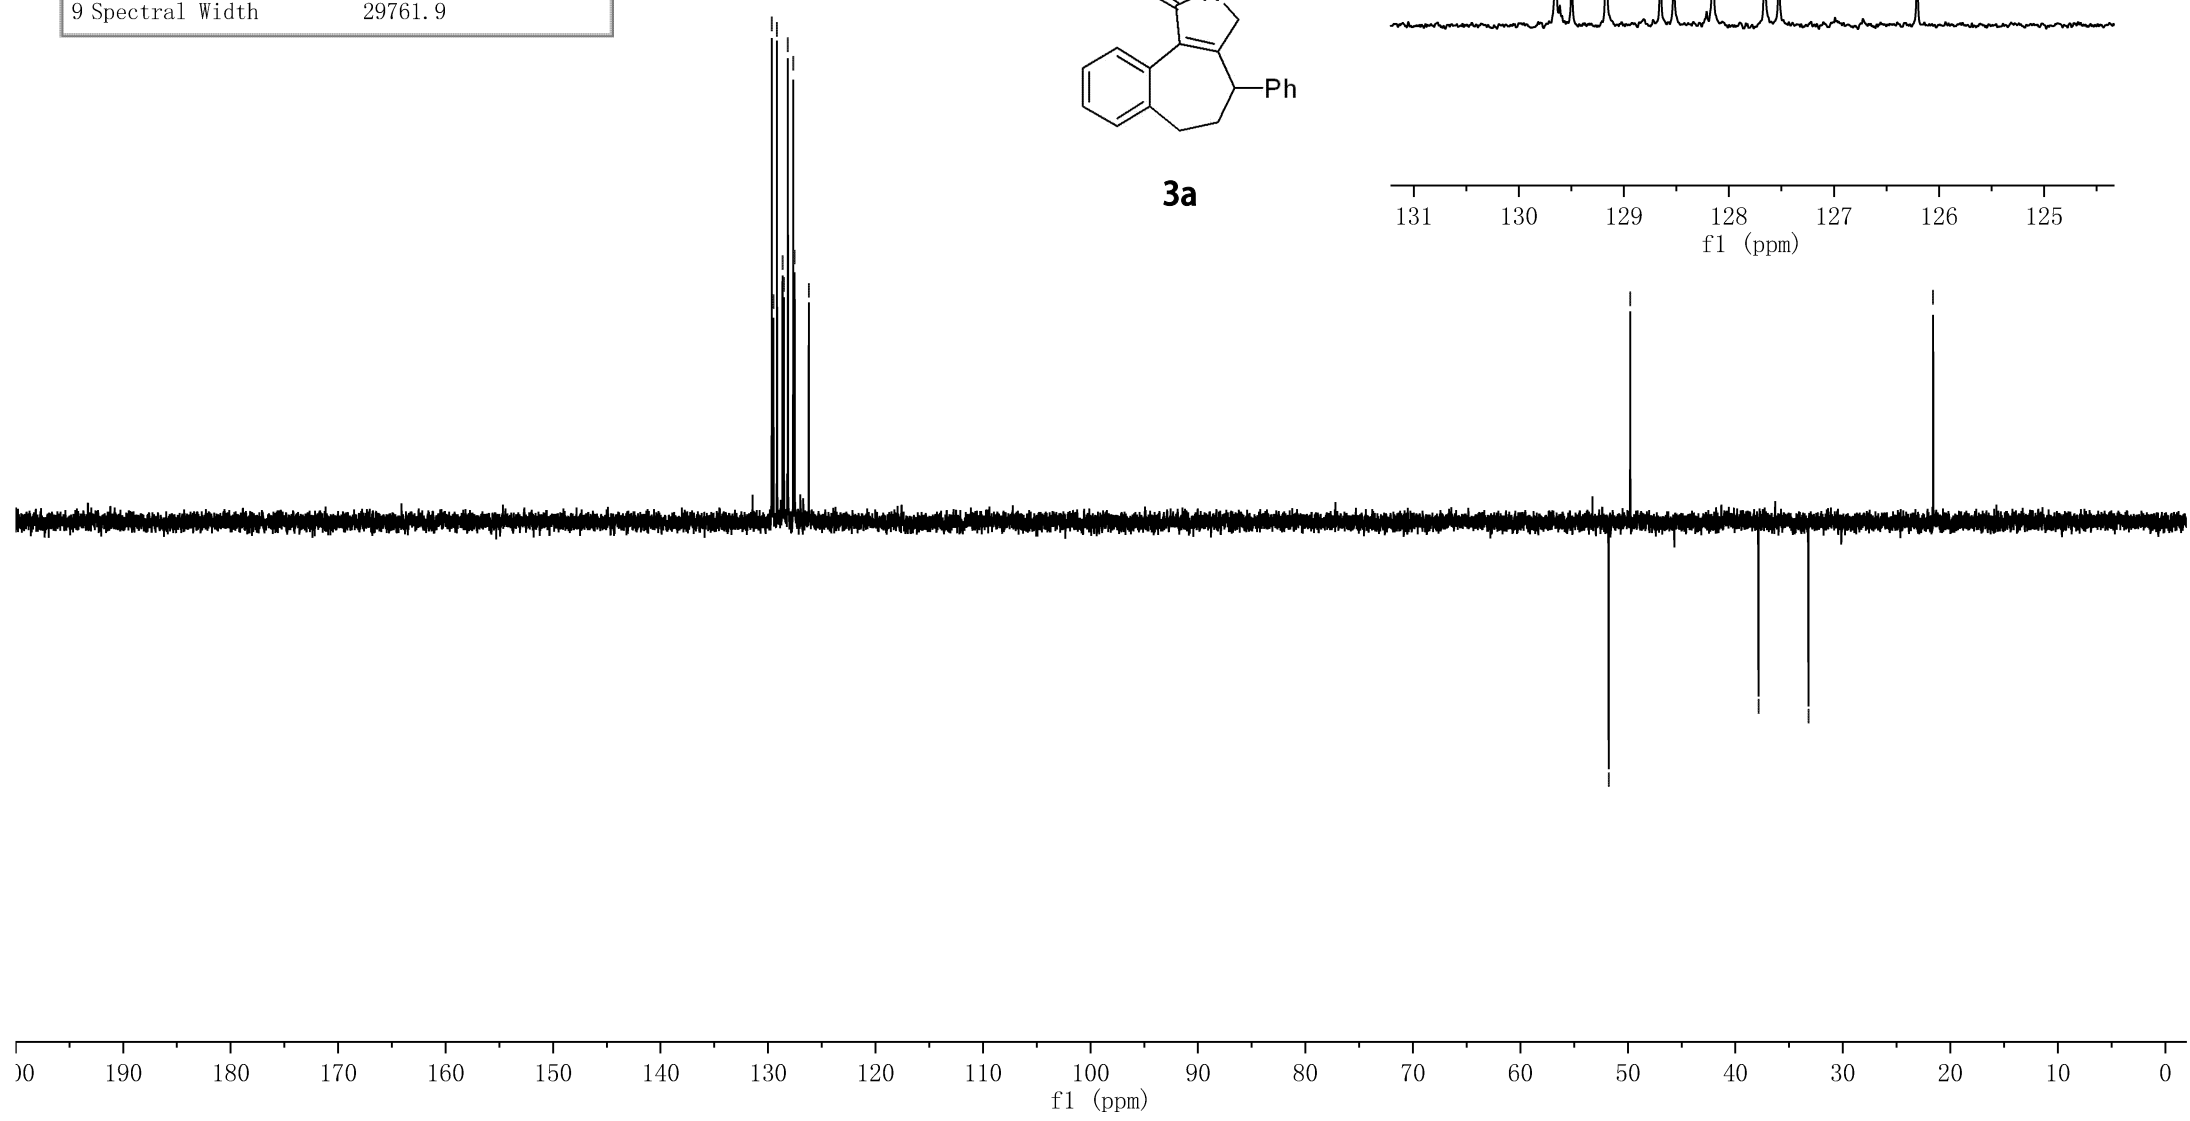

Supplement: d2qo00123c1.pdf [file d2qo00123c1.pdf]
